# Supplementary material for: Predicting human intestinal absorption with modified random forest approach: a comprehensive evaluation of molecular representation, unbalanced data, and applicability domain issues
Source: Royal Society of Chemistry journal article supplement (doi:10.1039/c6ra28442f), 2017-01-01
Supplement: c6ra28442f1.xlsx [file c6ra28442f1.xlsx]

## Sheet: 480+98
Name	SMI	Class	label
AAFC	FC1=CN2[C@@H]3O[C@H](CO)[C@@H](O)[C@@H]3OC2=NC1=N	Tr	1
Arbekacin	O1[C@H](CO)[C@@H](O)[C@H](N)[C@@H](O)[C@H]1O[C@@H]1[C@@H](O)[C@H](O[C@H]2O[C@@H](CC[C@H]2N)CN)[C@@H](N)C[C@H]1NC(=O)[C@@H](O)CCN	Tr	0
Azlocillin	S1[C@H]2N([C@@H](C(O)=O)C1(C)C)C(=O)[C@H]2NC(=O)[C@H](NC(=O)N1CCNC1=O)c1ccccc1	Tr	0
Cefodizime	s1c(CC(O)=O)c(nc1SCC=1CS[C@H]2N(C=1C(O)=O)C(=O)[C@H]2NC(=O)\C(=N/OC)\c1nc(sc1)N)C	Tr	0
Gentamicin_C1a	O1[C@H](O[C@H]2[C@H](O)[C@@H](O[C@H]3OC[C@@](O)(C)[C@H](NC)[C@H]3O)[C@H](N)C[C@@H]2N)[C@H](N)CC[C@H]1CC	Tr	0
Lucifer_Yellow_CH	S(O)(=O)(=O)c1cc2c3c(cc(S(O)(=O)=O)cc3c1N)C(=O)N(NNC(=O)NN)C2=O	Tr	0
Meropenem	S([C@@H]1N[C@@H](CC1)C(=O)N(C)C)C=1[C@@H]([C@H]2N(C=1C(O)=O)C(=O)[C@@H]2[C@@H](O)C)C	Tr	0
Mezlocillin	S1[C@@H]2N([C@@H](C(O)=O)C1(C)C)C(=O)[C@@H]2NC(=O)[C@@H](NC(=O)N1CCN(S(=O)(=O)C)C1=O)c1ccccc1	Tr	0
Netilmicin	O1[C@@H](O[C@H]2[C@H](O)[C@@H](O[C@H]3OC[C@@](O)(C)[C@H](NC)[C@H]3O)[C@H](NCC)C[C@@H]2N)[C@@H](N)CC=C1CN	Tr	0
Pentamidine	O(CCCCCOc1ccc(cc1)C(N)=N)c1ccc(cc1)C(N)=N	Tr	0
Raffinose	O1[C@](O[C@H]2O[C@H](CO[C@H]3O[C@H](CO)[C@H](O)[C@H](O)[C@H]3O)[C@@H](O)[C@H](O)[C@H]2O)(CO)[C@@H](O)[C@H](O)[C@H]1CO	Tr	0
Streptozocin	O1[C@H](CO)[C@@H](O)[C@H](O)[C@@H](NC(=O)N(N=O)C)[C@H]1O	Tr	0
Tobramycin	O1[C@H](CO)[C@@H](O)[C@H](N)[C@@H](O)[C@H]1O[C@@H]1[C@H](O)[C@H](O[C@H]2O[C@H](CN)[C@@H](O)C[C@H]2N)[C@@H](N)C[C@H]1N	Tr	0
Vancomycin	Clc1c2Oc3cc4[C@H](NC(=O)[C@@H](NC(=O)[C@@H](NC(=O)[C@H](NC)CC(C)C)[C@H](O)c(c1)cc2)CC(=O)N)C(=O)N[C@@H]1c2cc(-c5c(cc(O)cc5O)[C@H](NC(=O)[C@@H](NC1=O)[C@@H](O)c1cc(Cl)c(Oc(c4)c3O[C@@H]3O[C@H](CO)[C@H](O)[C@@H](O)[C@H]3O[C@H]3O[C@@H](C)[C@H](O)[C@@](N)(C3)C)cc1)C(O)=O)c(O)cc2	Tr	0
alcuronium chloride	OCC=C1C2C=3C4N(C=C5C6CC7[N+](CC6=CCO)(CCC67C5N(C=3)c3c6cccc3)CC=C)c3c(C45C([N+](C1)(CC5)CC=C)C2)cccc3	Tr	0
atracurium	O(C)c1cc(ccc1OC)CC1[N+](CCc2c1cc(OC)c(OC)c2)(CCC(OCCCCCOC(=O)CC[N+]1(CCc2c(cc(OC)c(OC)c2)C1Cc1cc(OC)c(OC)cc1)C)=O)C	Tr	0
bephenium	O(CC[N+](Cc1ccccc1)(C)C)c1ccccc1	Tr	0
bethanechol	O(C(C[N+](C)(C)C)C)C(=O)N	Tr	0
bretylium tosilate	Brc1ccccc1[CH-][N+](CC)(C)C	Tr	0
butylscopolamine	O1C2C3[N+](C(CC(OC(=O)C(CO)c4ccccc4)C3)C12)(CCCC)C	Tr	0
cefpirome	s1cc(nc1N)/C(=N/OC)/C(=O)NC1C2SCC(C[n+]3ccccc3)=C(N2C1=O)C(O)=O	Tr	0
ceftazidime	s1cc(nc1N)/C(=N/OC(C(O)=O)(C)C)/C(=O)NC1C2SCC(C[n+]3ccccc3)=C(N2C1=O)C(O)=O	Tr	0
diphemanil	[N+]1(CCC(CC1)=C(c1ccccc1)c1ccccc1)(C)C	Tr	0
distigmine	O(C(=O)N(CCCCCCN(C(Oc1ccc[n+](c1)C)=O)C)C)c1ccc[n+](c1)C	Tr	0
Edrophonium	Oc1cc([N+](CC)(C)C)ccc1	Tr	0
Gallamine	[I-].[I-].[I-].O(CC[N+](CC)(CC)CC)c1c(OCC[N+](CC)(CC)CC)cccc1OCC[N+](CC)(CC)CC	Tr	0
glycopyrrolate	O(C(=O)C(O)(C1CCCC1)c1ccccc1)C1CC[N+](C1)(C)C	Tr	0
ipratropium	O(C(=O)C(CO)c1ccccc1)C1CC2[N+](C(C1)CC2)(C(C)C)C	Tr	0
mivacurium	O(C)c1c(OC)cc(cc1OC)CC1[N+](CCc2c1cc(OC)c(OC)c2)(CCCOC(=O)CC\C=C\CCC(OCCC[N+]1(CCc2c(cc(OC)c(OC)c2)C1Cc1cc(OC)c(OC)c(OC)c1)C)=O)C	Tr	0
neostigmine bromide	O(C(=O)N(C)C)c1cc([N+](C)(C)C)ccc1	Tr	0
obidoxime	O(C[n+]1ccc(cc1)\C=N\O)C[n+]1ccc(cc1)\C=N\O	Tr	0
oxitropium	O1C2C3[N+](C(CC(OC(=O)C(CO)c4ccccc4)C3)C12)(CC)C	Tr	0
pancuronium	O(C(=O)C)C1C2(C(CC1[N+]1(CCCCC1)C)C1C(CC2)C2(CC([N+]3(CCCCC3)C)C(OC(=O)C)CC2CC1)C)C	Tr	0
pentolinium	[N+]1(CCCC1)(CCCCC[N+]1(CCCC1)C)C	Tr	0
poldine	O(CC1[N+](CCC1)(C)C)C(=O)C(O)(c1ccccc1)c1ccccc1	Tr	0
pralidoxime	O\N=C\c1[n+](cccc1)C	Tr	0
propantheline	O1c2c(cccc2)C(c2c1cccc2)C(OCC[N+](C(C)C)(C(C)C)C)=O	Tr	0
Trospium	O(C(=O)C(O)(c1ccccc1)c1ccccc1)C1C[C@@H]2[N+]3([C@H](C1)CC2)CCCC3	Tr	0
tubocurarine	O1c2cc3C([N+](CCc3cc2OC)(C)C)Cc2ccc(Oc3c4C([N+](CCc4cc(OC)c3O)(C)C)Cc3cc1c(O)cc3)cc2	Tr	0
vecuronium	O(C(=O)C)[C@@H]1[C@@]2([C@H]([C@H]3[C@H](CC2)[C@@]2([C@H](C[C@H](OC(=O)C)[C@@H](N4CCCCC4)C2)CC3)C)C[C@@H]1[N+]1(CCCCC1)C)C	Tr	0
Alendronic_acid	P(O)(O)(=O)C(P(O)(O)=O)(O)CCCN	Tr	0
Aztreonam	s1cc(nc1N)/C(=N\OC(C(O)=O)(C)C)/C(=O)N[C@H]1[C@@H](N(S(O)(=O)=O)C1=O)C	Tr	0
Ceftriaxone	s1cc(nc1N)/C(=N/OC)/C(=O)N[C@H]1[C@H]2SCC(CSC3=NC(=O)C(=O)NN3C)=C(N2C1=O)C(O)=O	Tr	0
Lactulose	O1[C@](O)(CO)[C@@H](O)[C@H](O[C@@H]2O[C@H](CO)[C@H](O)[C@H](O)[C@H]2O)[C@H]1CO	Tr	0
Risedronic_acid	P(O)(O)(=O)C(P(O)(O)=O)(O)Cc1cccnc1	Tr	0
Streptomycin	O1[C@@H](CO)[C@H](O)[C@H](O)[C@H](NC)[C@@H]1O[C@H]1[C@@](O)(C=O)[C@@H](O[C@@H]1O[C@@H]1[C@@H](NC(N)=N)[C@H](O)[C@@H](NC(N)=N)[C@H](O)[C@H]1O)C	Tr	0
Acarbose	O1[C@H](C)[C@@H](N[C@H]2C=C(CO)[C@@H](O)[C@H](O)[C@H]2O)[C@H](O)[C@@H](O)[C@H]1O[C@H]1[C@H](O)[C@@H](O)[C@H](O[C@@H]1CO)O[C@@H]([C@H](O)CO)[C@@H](O)[C@@H](O)C=O	Tr	0
Amphotericin B	O1[C@@H](C)[C@H](C)[C@H](O)[C@H](\C=C/C=C\C=C\C=C\C=C\C=C\C=C\[C@H](O[C@@H]2O[C@H](C)[C@@H](O)[C@H](N)[C@@H]2O)C[C@@H]2O[C@@](O)(C[C@H](O)[C@H]2C(O)=O)C[C@H](O)C[C@H](O)[C@@H](O)CC[C@@H](O)C[C@@H](O)CC1=O)C	Tr	0
Clodronate	ClC(Cl)(P(O)(O)=O)P(O)(O)=O	Tr	0
Nedocromil	O1c2c(cc3c(N(CC)C(=CC3=O)C(O)=O)c2CCC)C(=O)C=C1C(O)=O	Tr	0
Neomycin	O1[C@@H](CN)[C@@H](O)[C@H](O)[C@@H](N)[C@H]1O[C@H]1[C@@H](O)[C@@H](O[C@@H]1CO)O[C@@H]1[C@H](O[C@@H]2O[C@H](CN)[C@@H](O)[C@H](O)[C@H]2N)[C@@H](N)C[C@H](N)[C@@H]1O	Tr	0
Amygdalin	O1[C@H](CO)[C@@H](O)[C@H](O)[C@@H](O)[C@@H]1OC[C@H]1O[C@@H](O[C@H](C#N)c2ccccc2)[C@H](O)[C@@H](O)[C@@H]1O	Tr	0
Cefotaxime	s1cc(nc1N)/C(=N/OC)/C(=O)N[C@H]1[C@H]2SCC(COC(=O)C)=C(N2C1=O)C(O)=O	Tr	0
Chlorhexidine	Clc1ccc(NC(NC(NCCCCNC(NC(Nc2ccc(Cl)cc2)=N)=N)=N)=N)cc1	Tr	0
Diatrizoate	Ic1c(C(O)=O)c(I)c(NC(=O)C)c(I)c1NC(=O)C	Tr	0
Edetic_acid	OC(=O)CN(CCN(CC(O)=O)CC(O)=O)CC(O)=O	Tr	0
Etidronate	P(O)(O)(=O)C(P(O)(O)=O)(O)C	Tr	0
Gentamincin_C1	O1[C@H](O[C@H]2[C@H](O)[C@@H](O[C@H]3OC[C@@](O)(C)[C@H](NC)[C@H]3O)[C@H](N)C[C@@H]2N)[C@H](N)CC[C@H]1[C@H](NC)C	Tr	0
Imipenem	S(CCNC=N)C=1C[C@H]2N(C=1C(O)=O)C(=O)[C@@H]2[C@H](O)C	Tr	0
Iohexol	Ic1c(C(=O)NC[C@H](O)CO)c(I)c(N(C(=O)C)C[C@H](O)CO)c(I)c1C(=O)NC[C@H](O)CO	Tr	0
Iotroxic_acid	Ic1c(C(O)=O)c(I)cc(I)c1NC(=O)COCCOCCOCC(=O)Nc1c(I)c(C(O)=O)c(I)cc1I	Tr	0
Mitoxantrone	Oc1c2c(C(=O)c3c(C2=O)c(NCCNCCO)ccc3NCCNCCO)c(O)cc1	Tr	0
Moexipril_diacid	O(C)c1cc2C[C@H](N(Cc2cc1OC)C(=O)[C@@H](N[C@@H](CCc1ccccc1)C(O)=O)C)C(O)=O	Tr	0
Pamidronic_acid	P(O)(O)(=O)C(P(O)(O)=O)(O)CCN	Tr	0
Phthalylsulfathiazole	s1ccnc1NS(=O)(=O)c1ccc(NC(=O)c2ccccc2C(O)=O)cc1	Tr	0
Succinylsulfathiazole	s1ccnc1NS(=O)(=O)c1ccc(NC(=O)CCC(O)=O)cc1	Tr	0
Sulbactam	S1(=O)(=O)[C@H]2N([C@H](C(O)=O)C1(C)C)C(=O)C2	Tr	0
Ticarcillin	S1[C@H]2N([C@@H](C(O)=O)C1(C)C)C(=O)[C@H]2NC(=O)[C@H](C(O)=O)c1ccsc1	Tr	0
Cefmetazole	S1[C@H]2N(C(C(O)=O)=C(C1)CSc1nnnn1C)C(=O)[C@@]2(OC)NC(=O)CSCC#N	Tr	0
Acamprosate	S(O)(=O)(=O)CCCNC(=O)C	Tr	0
Cilazaprilat	O=C1N2N(CCC[C@@H]1N[C@@H](CCc1ccccc1)C(O)=O)CCC[C@H]2C(O)=O	Tr	0
Lincomycin	S(C)[C@H]1O[C@H]([C@@H](NC(=O)[C@H]2N(C[C@@H](C2)CCC)C)[C@@H](O)C)[C@H](O)[C@H](O)[C@H]1O	Tr	0
Netivudine	O1[C@H](CO)[C@@H](O)[C@H](O)[C@@H]1N1C=C(C#CC)C(=O)NC1=O	Tr	0
Fosmidomycin	P(O)(O)(=O)CCCN(O)C=O	Tr	0
Nadolol	O(C[C@@H](O)CNC(C)(C)C)c1c2C[C@H](O)[C@H](O)Cc2ccc1	Tr	1
Dihydroergotamine	O1[C@](NC(=O)[C@@H]2C[C@H]3[C@H](N(C2)C)Cc2c4c3cccc4[nH]c2)(C)C(=O)N2[C@@H](Cc3ccccc3)C(=O)N3[C@@H](CCC3)[C@]12O	Tr	1
Sulpiride	S(=O)(=O)(N)c1cc(C(=O)NC[C@H]2N(CCC2)CC)c(OC)cc1	Tr	1
Famotidine	s1cc(nc1N=C(N)N)CSCC/C(=N/S(=O)(=O)N)/N	Tr	1
Metaproterenol	Oc1cc(cc(O)c1)[C@H](O)CNC(C)C	Tr	1
Cymarin	O1CC(=CC1=O)[C@H]1CC[C@@]2(O)[C@H]3[C@H](CC[C@@]12C)[C@]1(CC[C@H](O[C@@H]2O[C@@H](C)[C@H](O)[C@H](OC)C2)C[C@@]1(O)CC3)C=O	Tr	1
Rimiterol	Oc1cc(ccc1O)[C@H](O)[C@@H]1NCCCC1	Tr	1
Atenolol	O(C[C@@H]([O-])C[N-]C(C)C)c1ccc(cc1)CC(=O)[N-2]	Tr	1
Cefpodoxime_proxetil	s1cc(nc1N)/C(=N\OC)/C(=O)N[C@H]1[C@H]2SCC(COC)=C(N2C1=O)C(O[C@H](OC(OC(C)C)=O)C)=O	Tr	1
Guanoxan	O1c2c(OC[C@H]1CNC(N)=N)cccc2	Tr	1
Trandolapril	O(CC)C(=O)[C@@H](N[C@H](C(=O)N1[C@@H]2[C@@H](C[C@H]1C(O)=O)CCCC2)C)CCc1ccccc1	Tr	1
Metformin	N(C(NC(N)=N)=N)(C)C	Tr	1
Eflornithine	FC(F)[C@](N)(CCCN)C(O)=O	Tr	1
Valsartan	OC(=O)[C@@H](N(Cc1ccc(cc1)-c1ccccc1-c1[nH]nnn1)C(=O)CCCC)C(C)C	Tr	1
Dipyridamole	OCCN(CCO)c1nc(N2CCCCC2)c2nc(nc(N3CCCCC3)c2n1)N(CCO)CCO	Tr	1
Oxytetracycline	OC=1[C@@H](N(C)C)[C@H]2[C@@](O)(C(=O)C=1C(=O)N)C(=O)C=1[C@@H]([C@](O)(c3c(C=1O)c(O)ccc3)C)[C@@H]2O	Tr	1
Cilazapril	O=C1N2N(CCC[C@@H]1N[C@@H](CCc1ccccc1)C(OCC)=O)CCC[C@H]2C(O)=O	Tr	1
Fenoterol	Oc1cc(cc(O)c1)[C@H](O)CN[C@H](Cc1ccc(O)cc1)C	Tr	1
Ivermectin	O1[C@H]2C[C@@]3(O[C@@H]4[C@H](C3)[C@H](C)[C@@H]4[C@H](CC)C)O[C@H](C\C=C(\C)/[C@H](O[C@@H]3O[C@H](C)[C@@H](O[C@@H]4O[C@@H](C)[C@H](O)[C@@H](OC)C4)[C@H](OC)C3)[C@@H](\C=C\C=C\3/CO[C@@H]4[C@@H](O)C(=C[C@@H]([C@]/34O)C1=O)C)C)C2	Tr	1
Oxycodone	O1[C@@H]2[C@]34CCN([C@H](Cc5c3c1c(OC)cc5)[C@]4(O)CCC2=O)C	Tr	1
Pirbuterol	Oc1ccc(nc1CO)[C@H](O)CNC(C)(C)C	Tr	1
Ramipril	O(CC)C(=O)[C@@H](N[C@H](C(=O)N1[C@@H]2[C@H](C[C@H]1C(O)=O)CCC2)C)CCc1ccccc1	Tr	1
Ziprasidone	Clc1cc2NC(=O)Cc2cc1CCN1CCN(CC1)c1nsc2c1cccc2	Tr	1
Furosemide	Clc1cc(NCc2occc2)c(cc1S(=O)(=O)N)C(O)=O	Tr	1
Sulfasalazine	S(=O)(=O)(Nc1ncccc1)c1ccc(\N=N\c2cc(C(O)=O)c(O)cc2)cc1	Tr	1
Terbutaline	Oc1cc(cc(O)c1)[C@H](O)CNC(C)(C)C	Tr	1
Chlorthalidone	Clc1ccc(cc1S(=O)(=O)N)[C@@]1(O)NC(=O)c2c1cccc2	Tr	1
Tolrestat	S=C(N(CC(O)=O)C)c1c2c(ccc1)c(C(F)(F)F)c(OC)cc2	Tr	1
Hydroflumethiazide	S(=O)(=O)(N)c1cc2S(=O)(=O)NCNc2cc1C(F)(F)F	Tr	1
Sumatriptan	S(=O)(=O)(NC)Cc1cc2c([nH]cc2CCN(C)C)cc1	Tr	1
Mibefradil	Fc1cc2c(cc1)[C@H](C(C)C)[C@](OC(=O)COC)(CC2)CCN(CCCc1[nH]c2c(n1)cccc2)C	Tr	1
Anagrelide	Clc1c2CN3CC(=O)NC3=Nc2ccc1Cl	Tr	1
Benserazide	Oc1c(O)c(O)ccc1CNNC(=O)[C@H](N)CO	Tr	1
Bromhexine	Brc1cc(Br)cc(CN(C)C2CCCCC2)c1N	Tr	1
Etodolac	O1CCc2c([nH]c3c2cccc3CC)[C@@]1(CC(O)=O)CC	Tr	1
Famciclovir	O(C(=O)C)CC(CCn1c2nc(ncc2nc1)N)COC(=O)C	Tr	1
Isocarboxazid	o1nc(cc1C)C(=O)NNCc1ccccc1	Tr	1
Mianserin	N12[C@@H](c3c(Cc4c1cccc4)cccc3)CN(CC2)C	Tr	1
Moxisylyte	O(C(=O)C)c1cc(C(C)C)c(OCCN(C)C)cc1C	Tr	1
Pimozide	Fc1ccc(cc1)C(CCN1CCC(N2c3c(NC2=O)cccc3)CC1)c1ccc(F)cc1	Tr	1
Recainam	O=C(Nc1c(cccc1C)C)NCCCNC(C)C	Tr	1
Ceftizoxime	s1cc(nc1N)/C(=N/OC)/C(=O)N[C@H]1[C@H]2SCC=C(N2C1=O)C(O)=O	Tr	1
Cycloserine	O1NC(=O)[C@@H](N)C1	Tr	1
Benzbromarone	Brc1cc(cc(Br)c1O)C(=O)c1c2c(oc1CC)cccc2	Tr	1
Quetiapine	S1c2c(cccc2)C(=Nc2c1cccc2)N1CCN(CC1)CCOCCO	Tr	1
Almotriptan	S(=O)(=O)(N1CCCC1)Cc1cc2c([nH]cc2CCN(C)C)cc1	Tr	1
Clavulanic_acid	O\1[C@H]2N([C@@H](C(O)=O)/C/1=C/CO)C(=O)C2	Tr	1
Ketoconazole	Clc1cc(Cl)ccc1[C@]1(O[C@@H](CO1)COc1ccc(N2CCN(CC2)C(=O)C)cc1)Cn1ccnc1	Tr	1
Mesna	S(O)(=O)(=O)CCS	Tr	1
Oseltamivir	O(C(CC)CC)[C@@H]1C=C(C[C@H](N)[C@H]1NC(=O)C)C(OCC)=O	Tr	1
Primidone	O=C1NCNC(=O)C1(CC)c1ccccc1	Tr	1
Ethylmorphine	O1[C@@H]2[C@]34[C@@H]([C@H](N(CC3)CC)Cc3c4c1c(O)cc3)C=C[C@@H]2O	Tr	1
Pantoprazole	S(=O)(Cc1nccc(OC)c1OC)c1[nH]c2c(n1)cc(OC(F)F)cc2	Tr	1
Sibutramine	Clc1ccc(cc1)C1(CCC1)[C@H](N(C)C)CC(C)C	Tr	1
Tolterodine	Oc1ccc(cc1[C@@H](CCN(C(C)C)C(C)C)c1ccccc1)C	Tr	1
Guanabenz	Clc1cccc(Cl)c1\C=N\NC(N)=N	Tr	1
Mefloquine	FC(F)(F)c1c2nc(cc(c2ccc1)[C@@H](O)[C@@H]1NCCCC1)C(F)(F)F	Tr	1
Urapidil	O(C)c1ccccc1N1CCN(CC1)CCCNC=1N(C)C(=O)N(C)C(=O)C=1	Tr	1
Zatebradin	O(C)c1cc(ccc1OC)CCN(CCCN1CCc2cc(OC)c(OC)cc2CC1=O)C	Tr	1
Metopirone	O=C(C(C)(C)c1cccnc1)c1cccnc1	Tr	1
Acetohexamide	S(=O)(=O)(NC(=O)NC1CCCCC1)c1ccc(cc1)C(=O)C	Tr	1
Allopurinol	Oc1ncnc2[nH]ncc12	Tr	1
Carvedilol	O(CCNC[C@@H](OCc1c2c3c([nH]c2ccc1)cccc3)O)c1ccccc1OC	Tr	1
Chlorpheniramine	Clc1ccc(N(CCN(C)C)c2ncccc2)cc1	Tr	1
Clonazepam	Clc1ccccc1C1=NCC(=O)Nc2c1cc([N+](=O)[O-])cc2	Tr	1
Dantrolene	o1c(ccc1\C=N\N1CC(=O)NC1=O)-c1ccc([N+](=O)[O-])cc1	Tr	1
Enoximone	S(C)c1ccc(cc1)C(=O)C1=NC(=O)N=C1C	Tr	1
Floxacillin	Clc1cccc(F)c1-c1noc(C)c1C(=O)N[C@H]1[C@H]2SC(C)(C)[C@@H](N2C1=O)C(O)=O	Tr	1
Flunarizine	Fc1ccc(cc1)C(N1CCN(CC1)C\C=C\c1ccccc1)c1ccc(F)cc1	Tr	1
Fluoxetine	FC(F)(F)c1ccc(O[C@H](CCNC)c2ccccc2)cc1	Tr	1
Guanadrel	O1[C@H](COC12CCCCC2)CNC(N)=N	Tr	1
Isoniazid	O=C(NN)c1ccncc1	Tr	1
Itraconazole	Clc1cc(Cl)ccc1[C@@]1(O[C@H](CO1)COc1ccc(N2CCN(CC2)c2ccc(N3C=NN([C@H](CC)C)C3=O)cc2)cc1)Cn1ncnc1	Tr	1
Mesalamine	Oc1ccc(N)cc1C(O)=O	Tr	1
Methadone	O=C(C(C[C@H](N(C)C)C)(c1ccccc1)c1ccccc1)CC	Tr	1
Methoxyamphetamine	O(C)c1cc(ccc1)C[C@H](N)C	Tr	1
Methylphenidate	O(C(=O)[C@@H]([C@@H]1NCCCC1)c1ccccc1)C	Tr	1
Modafinil	S(=O)(C(c1ccccc1)c1ccccc1)CC(=O)N	Tr	1
Nabumetone	O(C)c1cc2c(cc(cc2)CCC(=O)C)cc1	Tr	1
Omeprazole	S(=O)(Cc1ncc(C)c(OC)c1C)c1nc2cc(OC)ccc2[n-]1	Tr	1
Oxamniquine	OCc1cc2CC[C@H](Nc2cc1[N+](=O)[O-])CNC(C)C	Tr	1
Pramipexole	s1c2C[C@@H](NCCC)CCc2nc1N	Tr	1
Quinidine	O(C)c1cc2c(nccc2[C@H](O)[C@H]2N3C[C@@H]([C@H](C2)CC3)C=C)cc1	Tr	1
Riboflavin	O=C1NC(=O)N=C2N(c3cc(C)c(cc3N=C12)C)C[C@@H](O)[C@@H](O)[C@@H](O)CO	Tr	1
Terbinafine	N(Cc1c2c(ccc1)cccc2)(C\C=C\C#CC(C)(C)C)C	Tr	1
Ticlopidine	Clc1ccccc1CN1CCc2sccc2C1	Tr	1
Trimeprazine	S1c2c(N(c3c1cccc3)C[C@H](CN(C)C)C)cccc2	Tr	1
Trimipramine	N(C[C@@H](CN1c2c(CCc3c1cccc3)cccc2)C)(C)C	Tr	1
Vitamin_A	OC\C=C(\C=C\C=C(\C=C\C=1C(CCCC=1C)(C)C)/C)/C	Tr	1
Flecainide	FC(F)(F)COc1ccc(OCC(F)(F)F)cc1C(=O)NC[C@@H]1NCCCC1	Tr	1
Aspirin	O(C(=O)C)c1ccccc1C(O)=O	Tr	1
Ibutilide	S(=O)(=O)(Nc1ccc(cc1)[C@H](O)CCCN(CCCCCCC)CC)C	Tr	1
Methylprednisolone	O=C1C=C2[C@@]([C@@H]3[C@H]([C@@H]4CC[C@](O)(C(=O)CO)[C@]4(C[C@@H]3O)C)C[C@@H]2C)(C=C1)C	Tr	1
Mifobate	Clc1ccc(cc1)[C@H](P(OC)(OC)=O)OP(OC)(OC)=O	Tr	1
Albuterol	Oc1ccc(cc1CO)[C@@H](O)CNC(C)(C)C	Tr	1
Milrinone	O=C1NC(C)=C(C=C1C#N)c1ccncc1	Tr	1
Nateglinide	OC(=O)[C@@H](NC(=O)C1CCC(CC1)C(C)C)Cc1ccccc1	Tr	1
Bromazepam	Brc1cc2c(NC(=O)CN=C2c2ncccc2)cc1	Tr	1
Acebutolol	O(C[C@@H](O)CNC(C)C)c1ccc(NC(=O)CCC)cc1C(=O)C	Tr	1
Acetaminophen	Oc1ccc(NC(=O)C)cc1	Tr	1
Chlorguanide	Clc1ccc(NC(NC(NC(C)C)=N)=N)cc1	Tr	1
Dolasetron	O(C(=O)c1c2c([nH]c1)cccc2)C1C[C@@H]2N3[C@H](C1)CC(C2)C(=O)C3	Tr	1
Isoproterenol	Oc1cc(ccc1O)[C@H](O)NC(C)C	Tr	1
Lansoprazole	S(=O)(Cc1nccc(OCC(F)(F)F)c1C)c1[nH]c2c(n1)cccc2	Tr	1
Molecule-618	O(C)c1cc2c(nccc2[C@H](O)[C@@H]2N3C[C@@H]([C@H](C2)CC3)C=C)cc1	Tr	1
Oxyfedrine	O(C)c1cc(ccc1)C(=O)CCN[C@H]([C@@H](O)c1ccccc1)C	Tr	1
Piretanide	S(=O)(=O)(N)c1cc(cc(N2CCCC2)c1Oc1ccccc1)C(O)=O	Tr	1
Sulfamethizole	s1c(nnc1NS(=O)(=O)c1ccc(N)cc1)C	Tr	1
Triazolam	Clc1ccccc1C1=NCc2[nH+]nc(n2-c2c1cc(Cl)cc2)C	Tr	1
Zalcitabine	O1[C@@H](CC[C@@H]1N1C=CC(=NC1=O)N)CO	Tr	1
Lamivudine	S1C[C@@H](O[C@H]1CO)N1C=CC(=NC1=O)N	Tr	1
Benzydamine	O(CCCN(C)C)c1nn(c2c1cccc2)Cc1ccccc1	Tr	1
Bupropion	Clc1cc(ccc1)C(=O)[C@H](NC(C)(C)C)C	Tr	1
Cimetidine	S(Cc1nc[nH]c1C)CCN\C(=N\C#N)\NC	Tr	1
Clindamycin	Cl[C@@H]([C@H](NC(=O)[C@H]1N(C[C@@H](C1)CCC)C)[C@H]1O[C@H](SC)[C@H](O)[C@@H](O)[C@H]1O)C	Tr	1
Acrivastine	OC(=O)\C=C\c1nc(ccc1)/C(=C/CN1CCCC1)/c1ccc(cc1)C	Tr	1
Disulfiram	S(SC(=S)N(CC)CC)C(=S)N(CC)CC	Tr	1
Metoclopramide	Clc1cc(C(=O)NCCN(CC)CC)c(OC)cc1N	Tr	1
Misoprostol	O=C1C[C@H](O)[C@H](\C=C\C[C@@](O)(CCCC)C)[C@H]1CCCCCCC(OC)=O	Tr	1
Moricizine	S1c2c(N(c3c1cccc3)C(=O)CCN1CCOCC1)cc(NC(OCC)=O)cc2	Tr	1
Moxonidine	Clc1nc(nc(OC)c1NC=1NCCN=1)C	Tr	1
Nitrendipine	O(C(=O)C=1[C@@H](C(C(OC)=O)=C(NC=1C)C)c1cc([N+](=O)[O-])ccc1)CC	Tr	1
Trovafloxacin	Fc1cc(F)ccc1N1C=C(C(O)=O)C(=O)c2cc(F)c(nc12)N1C[C@@H]2[C@H](C1)C2N	Tr	1
Dihydrocodeine	O1[C@@H]2[C@]34[C@H]([C@H](N(CC3)C)Cc3c4c1c(OC)cc3)CC[C@@H]2O	Tr	1
Sultopride	S(=O)(=O)(CC)c1cc(C(=O)NC[C@H]2N(CCC2)CC)c(OC)cc1	Tr	1
Tenidap	Clc1cc\2c(N(C(=O)N)C(=O)/C/2=C(/O)\c2sccc2)cc1	Tr	1
Almitrine	Fc1ccc(cc1)C(N1CCN(CC1)c1nc(nc(n1)NCC=C)NCC=C)c1ccc(F)cc1	Tr	1
Amantadine	NC12CC3CC(C1)CC(C2)C3	Tr	1
Amphetamine	N[C@@H](Cc1ccccc1)C	Tr	1
Azatadine	n1c2c(CCc3c(cccc3)C2=C2CCN(CC2)C)ccc1	Tr	1
Betaxolol	O(C[C@@H](O)CNC(C)C)c1ccc(cc1)CCOCC1CC1	Tr	1
Bisoprolol	O(C[C@@H](O)CNC(C)C)c1ccc(cc1)COCCOC(C)C	Tr	1
Chlorzoxazone	Clc1cc2NC(Oc2cc1)=O	Tr	1
Dapsone	S(=O)(=O)(c1ccc(N)cc1)c1ccc(N)cc1	Tr	1
Dexamethasone	F[C@@]12[C@H]([C@@H]3C[C@@H](C)[C@](O)(C(=O)CO)[C@]3(C[C@@H]1O)C)CCC1=CC(=O)C=C[C@@]12C	Tr	1
Diethylstilbestrol	Oc1ccc(cc1)/C(=C(\CC)/c1ccc(O)cc1)/CC	Tr	1
Diflunisal	Fc1cc(F)ccc1-c1cc(C(O)=O)c(O)cc1	Tr	1
Diloxanide	ClC(Cl)C(=O)N(C)c1ccc(O)cc1	Tr	1
Ethacrynic_acid	Clc1c(Cl)c(OCC(O)=O)ccc1C(=O)C(=O)CC	Tr	1
Felbamate	O(CC(COC(=O)N)c1ccccc1)C(=O)N	Tr	1
Feprazone	O=C1N(N(C(=O)C1CC=C(C)C)c1ccccc1)c1ccccc1	Tr	1
Flutamide	FC(F)(F)c1cc(NC(=O)C(C)C)ccc1[N+](=O)[O-]	Tr	1
Fluvoxamine	FC(F)(F)c1ccc(cc1)/C(=N/OCCN)/CCCCOC	Tr	1
Hydroxyprogesterone_caproate	O=C1CC[C@@]2([C@@H]3[C@H]([C@@H]4CC[C@](OC(=O)CCCCC)(C(=O)C)[C@]4(CC3)C)C=CC2=C1)C	Tr	1
Isosorbide_dinitrate	O1[C@H]2[C@H](OC[C@@H]2O[N+](=O)[O-])[C@H](O[N+](=O)[O-])C1	Tr	1
Isotretinoin	OC(=O)\C=C(\C=C\C=C(\C=C/C=1C(CCCC=1C)(C)C)/C)/C	Tr	1
Ketotifen	s1c2c(cc1)C(c1c(CC2=O)cccc1)=C1CCN(CC1)C	Tr	1
Loratadine	Clc1cc2c(cc1)C(c1ncccc1CC2)=C1CCN(CC1)C(OCC)=O	Tr	1
Mebeverine	O(C)c1cc(ccc1OC)C(OCCCCN([C@H](Cc1ccc(OC)cc1)C)CC)=O	Tr	1
Mefenamic_acid	OC(=O)c1ccccc1Nc1cccc(C)c1C	Tr	1
Meloxicam	s1c(cnc1NC(=O)C=1N(S(=O)(=O)c2c(cccc2)C=1O)C)C	Tr	1
Mifepristone	O=C1CCC2=C3[C@H]([C@@H]4CC[C@@](O)(C#C)[C@]4(C[C@@H]3c3ccc(N(C)C)cc3)C)CCC2=C1	Tr	1
Morphine	O1[C@@H]2[C@]34[C@H]([C@H](N(CC3)C)Cc3c4c1c(O)cc3)C=C[C@@H]2O	Tr	1
Moxifloxacin	Fc1cc2c(N(C=C(C(O)=O)C2=O)C2CC2)c(OC)c1N1C[C@H]2[C@H](NCCC2)C1	Tr	1
Nalidixic_acid	O=C1c2ccc(nc2N(C=C1C(O)=O)CC)C	Tr	1
Nisoldipine	O(C(=O)C=1[C@H](C(C(OC)=O)=C(NC=1C)C)c1ccccc1[N+](=O)[O-])CC(C)C	Tr	1
Papaverine	O(C)c1cc(ccc1OC)Cc1nccc2c1cc(OC)c(OC)c2	Tr	1
Phenazopyridine	n1c(N)c(\N=N\c2ccccc2)ccc1N	Tr	1
Phenytoin	O=C1NC(=O)NC1(c1ccccc1)c1ccccc1	Tr	1
Protionamide	S=C(N)c1cc(ncc1)CCC	Tr	1
Quinalbarbitone	O=C1NC(=O)NC(=O)C1([C@H](CCC)C)CC=C	Tr	1
Rabeprazole	S(=O)(Cc1nccc(OCCCOC)c1C)c1[nH]c2c(n1)cccc2	Tr	1
Riluzole	s1c2cc(OC(F)(F)F)ccc2nc1N	Tr	1
Sparfloxacin	Fc1c(N2C[C@H](N[C@H](C2)C)C)c(F)c2N(C=C(C(O)=O)C(=O)c2c1N)C1CC1	Tr	1
Sulfisomidine	S(=O)(=O)(Nc1nc(nc(c1)C)C)c1ccc(N)cc1	Tr	1
Sulindac	S(=O)(C)c1ccc(cc1)\C=C/1\c2c(cc(F)cc2)C(CC(O)=O)=C\1C	Tr	1
Telithromycin	O1[C@@H](CC)[C@]2(OC(=O)N([C@H]2[C@@H](C)C(=O)[C@H](C[C@](OC)(C)[C@@H](O[C@@H]2O[C@H](C[C@H](N(C)C)[C@@H]2O)C)[C@@H](C)C(=O)[C@@H](C)C1=O)C)CCCCn1cc(nc1)-c1cccnc1)C	Tr	1
Thiabendazole	s1cc(nc1)-c1[nH]c2c(n1)cccc2	Tr	1
Tiagabine	s1ccc(C)c1C(=CCCN1C[C@@H](CCC1)C(O)=O)c1sccc1C	Tr	1
Tibolone	O=C1CC=2C[C@H]([C@H]3[C@@H]4CC[C@](O)(C#C)[C@]4(CC[C@@H]3C=2CC1)C)C	Tr	1
Tolazoline	N1CCN=C1Cc1ccccc1	Tr	1
Triamcinolone_acetonide	F[C@@]12[C@H]([C@@H]3C[C@H]4OC(O[C@@]4(C(=O)CO)[C@]3(C[C@@H]1O)C)(C)C)CCC1=CC(=O)C=C[C@@]12C	Tr	1
Diltiazem	S1c2c(N(CCN(C)C)C(=O)[C@H](OC(=O)C)[C@@H]1c1ccc(OC)cc1)cccc2	Tr	1
Hydrocortisone	O=C1CC[C@@]2([C@@H]3[C@H]([C@@H]4CC[C@](O)(C(=O)CO)[C@]4(C[C@H]3O)C)CCC2=C1)C	Tr	1
Naloxone	O1[C@@H]2[C@]34CCN([C@H](Cc5c3c1c(O)cc5)[C@]4(O)CCC2=O)CC=C	Tr	1
Terazosin	O1CCC[C@H]1C(=O)N1CCN(CC1)c1nc(N)c2cc(OC)c(OC)cc2n1	Tr	1
Isradipine	o1[nH][c+]2-[c+]([nH]1)cccc2[C@@H]1C(C(OC(C)C)=O)=C(NC(C)=C1C(OC)=O)C	Tr	1
Alprenolol	O(C[C@@H](O)CNC(C)C)c1ccccc1CC=C	Tr	1
Amrinone	O=C1NC=C(C=C1N)c1ccncc1	Tr	1
Scopolamine	O1[C@H]2[C@H]3N([C@@H]([C@@H]12)CC(OC(=O)[C@H](CO)c1ccccc1)C3)C	Tr	1
Tetrahydrocannabinol	O1c2c([C@H]3[C@@H](CCC(=C3)C)C1(C)C)c(O)cc(c2)CCCCC	Tr	1
Atropine	O(C(=O)[C@H](CO)c1ccccc1)C1C[C@@H]2N([C@H](C1)CC2)C	Tr	1
Clozapine	Clc1cc2N=C(N3CCN(CC3)C)c3c(Nc2cc1)cccc3	Tr	1
Felodipine	Clc1c(cccc1Cl)[C@@H]1C(C(OCC)=O)=C(NC(C)=C1C(OC)=O)C	Tr	1
Fluconazole	Fc1cc(F)ccc1C(O)(Cn1ncnc1)Cn1ncnc1	Tr	1
Nicotinic_acid	OC(=O)c1cccnc1	Tr	1
Acipimox	OC(=O)c1ncc([n+]([O-])c1)C	Tr	1
Amitriptyline	N(CCC=C1c2c(CCc3c1cccc3)cccc2)(C)C	Tr	1
Amobarbital	O=C1[N-]C(=O)[N-]C(=O)C1(CCC(C)C)CC	Tr	1
Amoxapine	Clc1cc2c(Oc3c(N=C2N2CCNCC2)cccc3)cc1	Tr	1
Baclofen	Clc1ccc(cc1)[C@H](N)CCC(O)=O	Tr	1
Carbimazole	S=C1N(C=CN1C)C(OCC)=O	Tr	1
Carteolol	O(C[C@@H](O)CNC(C)(C)C)c1c2CCC(=O)Nc2ccc1	Tr	1
Cephradine	S1[C@H]2N(C(C(O)=O)=C(C1)C)C(=O)[C@H]2NC(=O)[C@H](N)C=1CC=CCC=1	Tr	1
Chorpropamide	Clc1ccc(S(=O)(=O)NC(=O)NCCC)cc1	Tr	1
Clomethiazole	ClCCc1scnc1C	Tr	1
Clomipramine	Clc1cc2N(c3c(CCc2cc1)cccc3)CCCN(C)C	Tr	1
Clonidine	Clc1cccc(Cl)c1N=C1NCCN1	Tr	1
Clopenthixol	Clc1cc\2c(Sc3c(cccc3)/C/2=C\CCN2CCN(CC2)CCO)cc1	Tr	1
Diethylpropion	O=C([C@@H](N(CC)CC)C)c1ccccc1	Tr	1
Disopyramide	O=C([N-2])[C@@](CCN(C(C)C)C(C)C)(c1ccccc1)c1ncccc1	Tr	1
Domperidone	Clc1cc2NC(=O)N(NC3CCN(CC3)CCCN3c4c(NC3=O)cccc4)c2cc1	Tr	1
Dothiepin	S1Cc2c(cccc2)\C(\c2c1cccc2)=C/CCN(C)C	Tr	1
Fludrocortisone_acetate	F[C@@]12[C@H]([C@@H]3CC[C@](O)(C(=O)COC(=O)C)[C@@]3(C[C@H]1O)C)CCC1=CC(=O)CC[C@]12C	Tr	1
Flumazenil	Fc1cc2c(-n3c(CN(C)C2=O)c(nc3)C(OCC)=O)cc1	Tr	1
Flurbiprofen	Fc1cc(ccc1-c1ccccc1)[C@H](C(O)=O)C	Tr	1
Galantamine	O1[C@@H]2[C@@]3(CCN(Cc4c3c1c(OC)cc4)C)C=C[C@H](O)C2	Tr	1
Glymidine	S(=O)(=O)(Nc1ncc(OCCOC)cn1)c1ccccc1	Tr	1
Hexobarbital	O=C1N(C)C(=O)NC(=O)[C@@]1(C)C=1CCCCC=1	Tr	1
Ketoprofen	OC(=O)[C@H](C)c1cc(ccc1)C(=O)c1ccccc1	Tr	1
Ketorolac	OC(=O)[C@H]1CCn2c1ccc2C(=O)c1ccccc1	Tr	1
Levamisole	S1CCN2C[C@H](N=C12)c1ccccc1	Tr	1
Lorazepam	Clc1ccccc1C1=N[C@H](O)C(=O)Nc2c1cc(Cl)cc2	Tr	1
Methimazole	S=C1NC=CN1C	Tr	1
Nicardipine	O(C(=O)c1c(C2C=C(NC(=C2)C)C)c(C(OC)=O)c(cc1[N+](=O)[O-])C)CCN(Cc1ccccc1)C	Tr	1
Nitrazepam	O=C1Nc2c(cc([N+](=O)[O-])cc2)C(=NC1)c1ccccc1	Tr	1
Nitrofurantoin	o1c(ccc1[N+](=O)[O-])\C=N\N1CC(=O)NC1=O	Tr	1
Nizatidine	s1cc(nc1CN(C)C)CSCCN\C(\NC)=C/[N+](=O)[O-]	Tr	1
Pefloxacin	Fc1cc2c(N(C=C(C(O)=O)C2=O)CC)cc1N1CCN(CC1)C	Tr	1
Pentazocine	Oc1cc2c(C[C@@H]3N(CC[C@@]2(C)[C@H]3C)CC=C(C)C)cc1	Tr	1
Pentoxifylline	O=C1N(CCCCC(=O)C)C(=O)N(c2ncn(c12)C)C	Tr	1
Perindopril	O(CC)C(=O)[C@H](N[C@@H](C(=O)N1[C@@H]2[C@H](C[C@H]1C(O)=O)CCCC2)C)CCC	Tr	1
Phenylpropanolamine	O[C@H]([C@H](N)C)c1ccccc1	Tr	1
Practolol	O(C[C@@H](O)CNC(C)C)c1ccc(NC(=O)C)cc1	Tr	1
Promethazine	S1c2c(N(c3c1cccc3)C[C@H](N(C)C)C)cccc2	Tr	1
Propafenone	O(C[C@@H](O)CNCCC)c1ccccc1C(=O)CCc1ccccc1	Tr	1
Propranolol	O(C[C@@H](O)CNC(C)C)c1c2c(ccc1)cccc2	Tr	1
Protriptyline	N(CCCC1c2c(C=Cc3c1cccc3)cccc2)C	Tr	1
Ritodrine	Oc1ccc(cc1)CCN[C@H]([C@@H](O)c1ccc(O)cc1)C	Tr	1
Sotalol	S(=O)(=O)(Nc1ccc(cc1)[C@@H](O)CNC(C)C)C	Tr	1
Sulfisoxazole	S(=O)(=O)(Nc1onc(C)c1C)c1ccc(N)cc1	Tr	1
Tacrine	n1c2c(CCCC2)c(N)c2c1cccc2	Tr	1
Temazepam	Clc1cc2c(N(C)C(=O)[C@@H](O)N=C2c2ccccc2)cc1	Tr	1
Timolol	s1nc(N2CCOCC2)c(OC[C@H](O)CNC(C)(C)C)n1	Tr	1
Tropisetron	O(C(=O)c1c2c([nH]c1)cccc2)C1C[C@@H]2N([C@H](C1)CC2)C	Tr	1
Venlafaxine	O(C)c1ccc(cc1)[C@H](CN(C)C)C1([O-])CCCCC1	Tr	1
Zolpidem	O=C(N(C)C)Cc1n2C=C(C=Cc2nc1-c1ccc(cc1)C)C	Tr	1
Bumetanide	S(=O)(=O)(N)c1cc(cc(NCCCC)c1Oc1ccccc1)C(O)=O	Tr	1
Clofibrate	Clc1ccc(OC(C(OCC)=O)(C)C)cc1	Tr	1
Gatifloxacin	Fc1cc2c(N(C=C(C(O)=O)C2=O)C2CC2)c(OC)c1N1C[C@H](NCC1)C	Tr	1
Metoprolol	O(C[C@@H](O)CNC(C)C)c1ccc(cc1)CCOC	Tr	1
Minoxidil	[O-][n+]1c(N)cc(nc1N)N1CCCCC1	Tr	1
Progesterone	O=C1CC[C@@]2([C@@H]3[C@H]([C@@H]4CC[C@H](C(=O)C)[C@]4(CC3)C)CCC2=C1)C	Tr	1
Torsemide	S(=O)(=O)(NC(=O)NC(C)C)c1cnccc1Nc1cc(ccc1)C	Tr	1
Trapidil	n12ncnc1N=C(C=C2N(CC)CC)C	Tr	1
Cotinine	O=C1N(C)[C@@H](CC1)c1cccnc1	Tr	1
Gallopamil	O(C)c1c(OC)cc(cc1OC)[C@@](C(C)C)(CCCN(CCc1cc(OC)c(OC)cc1)C)C#N	Tr	1
Gliclazide	S(=O)(=O)(NC(=O)NN1C[C@@H]2[C@H](CCC2)C1)c1ccc(cc1)C	Tr	1
Oxazepam	Clc1cc2c(NC(=O)[C@H](O)N=C2c2ccccc2)cc1	Tr	1
Risperidone	Fc1cc2onc(c2cc1)C1CCN(CC1)CCC=1C(=O)N2C(=NC=1C)CCCC2	Tr	1
Antipyrine	O=C1N(N(C)C(=C1)C)c1ccccc1	Tr	1
Chlorpromazine	Clc1cc2N(c3c(Sc2cc1)cccc3)CCCN(C)C	Tr	1
Cisapride	Clc1cc(C(=O)N[C@@H]2CCN(C[C@@H]2OC)CCCOc2ccc(F)cc2)c(OC)cc1N	Tr	1
Cyproterone_acetate	ClC=1C2=CC(=O)[C@H]3[C@H](C3)[C@@]2([C@@H]2[C@H]([C@@H]3CC[C@](OC(=O)C)(C(=O)C)[C@]3(CC2)C)C=1)C	Tr	1
Glibornuride	S(=O)(=O)(NC(=O)N[C@@H]1[C@@H]2CC[C@](C)([C@@H]1O)C2(C)C)c1ccc(cc1)C	Tr	1
Glyburide	Clc1cc(C(=O)NCCc2ccc(S(=O)(=O)NC(=O)NC3CCCCC3)cc2)c(OC)cc1	Tr	1
Ibuprofen	OC(=O)[C@H](C)c1ccc(cc1)CC(C)C	Tr	1
Imatinib	O=C(Nc1cc(Nc2nc(ccn2)-c2cccnc2)c(cc1)C)c1ccc(cc1)CN1CCNCC1	Tr	1
Isoxepac	O1Cc2c(cccc2)C(=O)c2cc(ccc12)CC(O)=O	Tr	1
Lacidipine	O(C(=O)C=1C(C(C(OCC)=O)=C(NC=1C)C)c1ccccc1\C=C\C(OC(C)(C)C)=O)CC	Tr	1
Lamotrigine	Clc1c(cccc1Cl)-c1nnc(nc1N)N	Tr	1
Lidocaine	O=C(Nc1c(cccc1C)C)CN(CC)CC	Tr	1
Mexiletine	O(C[C@H](N)C)c1c(cccc1C)C	Tr	1
Nefopam	O1CCN(Cc2c(cccc2)[C@@H]1c1ccccc1)C	Tr	1
Oxaprozin	o1c(c(nc1CCC(O)=O)-c1ccccc1)-c1ccccc1	Tr	1
Pelrinone	O=C1NC(=NC(NCc2cccnc2)=C1C#N)C	Tr	1
Rivastigmine	O(C(=O)N(CC)C)c1cc(ccc1)[C@@H](N(C)C)C	Tr	1
Ropinirole	O=C1Nc2c(C1)c(ccc2)CCN(CCC)CCC	Tr	1
Tolmesoxide	S(=O)(C)c1cc(OC)c(OC)cc1C	Tr	1
Valproic_acid	OC(=O)C(CCC)CCC	Tr	1
Zopiclone	Clc1ccc(nc1)N1[C@H](OC(=O)N2CCN(CC2)C)c2nccnc2C1=O	Tr	1
Caffeine	O=C1N(C)C(=O)N(c2ncn(c12)C)C	Tr	1
Chlordiazepoxide	Clc1cc2c(N=C(NC)C[N+]([O-])=C2c2ccccc2)cc1	Tr	1
Ciprofibrate	ClC1(Cl)C[C@@H]1c1ccc(OC(C(O)=O)(C)C)cc1	Tr	1
Diazepam	Clc1cc2c(N(C)C(=O)CN=C2c2ccccc2)cc1	Tr	1
Fluorescein	O1C2(c3c(cccc3)C1=O)c1c(Oc3c2ccc(O)c3)cc(O)cc1	Tr	1
Lomefloxacin	Fc1c2N(C=C(C(O)=O)C(=O)c2cc(F)c1N1C[C@@H](NCC1)C)CC	Tr	1
Miconazole	Clc1cc(Cl)ccc1CO[C@H](Cn1ccnc1)c1ccc(Cl)cc1Cl	Tr	1
Pheniramine	n1ccccc1[C@H](CCN(C)C)c1ccccc1	Tr	1
Prednisolone	O=C1C=C2CC[C@@H]3[C@@H]([C@]2(C=C1)C)[C@@H](O)C[C@]1([C@H]3CC[C@]1(O)C(=O)CO)C	Tr	1
Tiacrilast	S(C)c1cc2c(N=CN(\C=C\C(O)=O)C2=O)cc1	Tr	1
Tianeptine	Clc1cc2S(=O)(=O)N(c3c(N(c2cc1)CCCCCCC(O)=O)cccc3)C	Tr	1
Viloxazine	O1CCNC[C@@H]1COc1ccccc1OCC	Tr	1
Acetanilide	O=C(Nc1ccccc1)C	Tr	1
Acetazolamide	s1c(nnc1S(=O)(=O)N)NC(=O)C	Tr	1
Alfacalcidol	O[C@H]1C[C@H](O)C\C(=C/C=C\2/[C@@H]3CC[C@H]([C@@H](CCCC(C)C)C)[C@]3(CCC/2)C)\C1=C	Tr	1
Aminopyrine	O=C1N(N(C)C(C)=C1N(C)C)c1ccccc1	Tr	1
Amosulalol	S(=O)(=O)(N)c1cc(ccc1[C@H](O)CNCCOc1ccccc1OC)C	Tr	1
Anastrozole	n1cn(nc1)Cc1cc(cc(c1)C(C#N)(C)C)C(C#N)(C)C	Tr	1
Astemizole	Fc1ccc(cc1)Cn1c2c(nc1NC1CCN(CC1)CCc1ccc(OC)cc1)cccc2	Tr	1
Azimilide	Clc1ccc(cc1)-c1oc(cc1)\C=N\N1CC(=O)N(CCCCN2CCN(CC2)C)C1=O	Tr	1
Bendroflumethiazide	S(=O)(=O)(N)c1cc2S(=O)(=O)N[C@@H](Nc2cc1C(F)(F)F)Cc1ccccc1	Tr	1
Benorylate	O(C(=O)C)c1ccccc1C(Oc1ccc(NC(=O)C)cc1)=O	Tr	1
Bepridil	O(CC(C)C)C[C@@H](N(Cc1ccccc1)c1ccccc1)CN1CCCC1	Tr	1
Bezafibrate	Clc1ccc(cc1)C(=O)NCCc1ccc(OC(C(O)=O)(C)C)cc1	Tr	1
Biperiden	O[C@](CCN1CCCCC1)([C@H]1[C@@H]2C=C[C@H](C1)C2)c1ccccc1	Tr	1
Bornaprine	O(C(=O)[C@@]1([C@H]2CC[C@@H](C1)C2)c1ccccc1)CCCN(CC)CC	Tr	1
Budesonide	O1[C@]2([C@@H](O[C@@H]1CCC)C[C@H]1[C@H]3[C@@H]([C@@]4(C(=CC(=O)C=C4)CC3)C)[C@H](O)C[C@@]12C)C(=O)CO	Tr	1
Camazepam	Clc1cc2c(N(C)C(=O)[C@@H](OC(=O)N(C)C)N=C2c2ccccc2)cc1	Tr	1
Carbamazepine	O=C(N)N1c2c(C=Cc3c1cccc3)cccc2	Tr	1
Carmustine	ClCCN(N=O)C(=O)NCCCl	Tr	1
Chloral_hydrate	ClC(Cl)(Cl)C(O)O	Tr	1
Chloroquine	Clc1cc2nccc(N[C@H](CCCN(CC)CC)C)c2cc1	Tr	1
Chlorphenesin	Clc1ccc(OC[C@@H](O)CO)cc1	Tr	1
Cicaprost	O[C@@H]1C[C@H]2[C@H](C\C(\C2)=C/COCC(O)=O)[C@H]1C#C[C@@H](O)[C@H](CC#CCC)C	Tr	1
Cilomilast	O(c1cc(ccc1OC)C1(CCC(CC1)C(O)=O)C#N)C1CCCC1	Tr	1
Citalopram	Fc1ccc(cc1)[C@@]1(OCc2cc(ccc12)C#N)CCCN(C)C	Tr	1
Corticosterone	O=C1CC[C@@]2([C@@H]3[C@H]([C@@H]4CC[C@H](C(=O)CO)[C@]4(C[C@H]3O)C)CCC2=C1)C	Tr	1
Coumarin	O1c2c(C=CC1=O)cccc2	Tr	1
Cyclopenthiazide	Clc1cc2N[C@H](NS(=O)(=O)c2cc1S(=O)(=O)N)CC1CCCC1	Tr	1
Diacetylmorphine	O1[C@@H]2[C@]34[C@H]([C@H](N(CCC3)C)Cc3c4c1c(OC(=O)C)cc3)C=C[C@@H]2OC(=O)C	Tr	1
Dicyclomine	O(C(=O)C1(CCCCC1)C1CCCCC1)CCN(CC)CC	Tr	1
Dofetilide	S(=O)(=O)(Nc1ccc(cc1)CCN(CCOc1ccc(NS(=O)(=O)C)cc1)C)C	Tr	1
Doxazosin	O1c2c(OC[C@H]1C(=O)N1CCN(CC1)c1nc(N)c3cc(OC)c(OC)cc3n1)cccc2	Tr	1
Ergotamine	O1[C@](NC(=O)[C@@H]2C=C3[C@H](N(C2)C)Cc2c4c3cccc4[nH]c2)(C)C(=O)N2[C@@H](Cc3ccccc3)C(=O)N3[C@@H](CCC3)[C@]12O	Tr	1
Ethinyl_Estradiol	Oc1cc2CC[C@H]3[C@@H]4CC[C@@](O)(C#C)[C@]4(CC[C@@H]3c2cc1)C	Tr	1
Ethyl_alcohol	OCC	Tr	1
Ethynodiol_diacetate	O(C(=O)C)[C@]1(CC[C@H]2[C@H]3[C@@H]([C@@H]4C(=C[C@@H](OC(=O)C)CC4)CC3)CC[C@]12C)C#C	Tr	1
Fenclofenac	Clc1cc(Cl)ccc1Oc1ccccc1CC(O)=O	Tr	1
Finasteride	O=C1N[C@@H]2CC[C@H]3[C@@H]4CC[C@H](C(=O)NC(C)(C)C)[C@]4(CC[C@@H]3[C@]2(C=C1)C)C	Tr	1
Flucytosine	Fc1cnc(O)nc1N	Tr	1
Flupentixol	S1c2c(cc(cc2)C(F)(F)F)\C(\c2c1cccc2)=C\CCN1CCN(CC1)CCO	Tr	1
Fluvastatin	Fc1ccc(cc1)-c1c2c(n(C(C)C)c1\C=C\[C@@H](O)C[C@@H](O)CC(O)=O)cccc2	Tr	1
Fusidic_acid	O(C(=O)C)[C@H]/1C[C@]2([C@@H](C[C@@H](O)[C@H]3[C@@]2(CC[C@H]2[C@H](C)[C@H](O)CC[C@@]23C)C)\C\1=C(/CCC=C(C)C)\C(O)=O)C	Tr	1
Gemfibrozil	O(CCCC(C(O)=O)(C)C)c1cc(ccc1C)C	Tr	1
Genaconazole	S(=O)(=O)([C@@H]([C@@](O)(Cn1ncnc1)c1ccc(F)cc1F)C)C	Tr	1
Glimepiride	S(=O)(=O)(NC(=O)NC1CCC(CC1)C)c1ccc(cc1)CCNC(=O)N1CC(C)=C(CC)C1=O	Tr	1
Glipizide	S(=O)(=O)(NC(=O)NC1CCCCC1)c1ccc(cc1)CCNC(=O)c1ncc(nc1)C	Tr	1
Glycine	OC(=O)CN	Tr	1
Granisetron	O=C(NC1C[C@@H]2N([C@H](C1)CCC2)C)c1nn(c2c1cccc2)C	Tr	1
Haloperidol	Clc1ccc(cc1)C1(O)CCN(CC1)CCCC(=O)c1ccc(F)cc1	Tr	1
Hydralazine	n1ncc2c(cccc2)c1NN	Tr	1
Indobufen	O=C1N(Cc2c1cccc2)c1ccc(cc1)[C@@H](CC)C(O)=O	Tr	1
Indomethacin	Clc1ccc(cc1)C(=O)n1c2c(cc(OC)cc2)c(CC(O)=O)c1C	Tr	1
Irbesartan	O=C1N(Cc2ccc(cc2)-c2ccccc2-c2nn[nH]n2)C(=NC12CCCC2)CCCC	Tr	1
Isosorbide-2-mononitrate	O1[C@H]2[C@H](OC[C@@H]2O)[C@@H](O[N+](=O)[O-])C1	Tr	1
Isoxicam	S1(=O)(=O)N(C)C(C(=O)Nc2noc(c2)C)=C(O)c2c1cccc2	Tr	1
Ketanserin	Fc1ccc(cc1)C(=O)C1CCN(CC1)CCN1C(=O)c2c(NC1=O)cccc2	Tr	1
Letrozole	n1cn(nc1)C(c1ccc(cc1)C#N)c1ccc(cc1)C#N	Tr	1
Levetiracetam	O=C1N(CCC1)[C@H](CC)C(=O)N	Tr	1
Levobunolol	O(C[C@@H](O)CNC(C)(C)C)c1c2c(ccc1)C(=O)CCC2	Tr	1
Levonorgestrel	O=C1CC[C@@H]2[C@@H]3[C@H]([C@@H]4CC[C@@](O)(C#C)[C@]4(CC3)CC)CCC2=C1	Tr	1
Lisuride	O=C(N[C@H]1C=C2[C@H](N(C1)C)Cc1c3c2cccc3[nH]c1)N(CC)CC	Tr	1
Lormetazepam	Clc1ccccc1C1=N[C@H](O)C(=O)N(c2c1cc(Cl)cc2)C	Tr	1
Lornoxicam	Clc1sc2c(S(=O)(=O)N(C)C(C(=O)Nc3ncccc3)=C2O)c1	Tr	1
Lynestrenol	O[C@]1(CC[C@H]2[C@H]3[C@@H]([C@@H]4C(CC3)=CCCC4)CC[C@]12C)C#C	Tr	1
Meclofenamic_acid	Clc1c(Nc2ccccc2C(O)=O)c(Cl)ccc1C	Tr	1
Megestrol_acetate	O=C1CC[C@@]2([C@@H]3[C@H]([C@@H]4CC[C@](OC(=O)C)(C(=O)C)[C@]4(CC3)C)C=C(C2=C1)C)C	Tr	1
Meperidine	O(C(=O)C1(CCN(CC1)C)c1ccccc1)CC	Tr	1
Meptazinol	Oc1cc(ccc1)[C@]1(CCCCN(C1)C)CC	Tr	1
Methsuximide	O=C1N(C)C(=O)C[C@@]1(C)c1ccccc1	Tr	1
Methylergonovine	OC[C@@H](NC(=O)[C@@H]1C=C2[C@H](N(C1)C)Cc1c3c2cccc3[nH]c1)CC	Tr	1
Methysergide	OC[C@@H](NC(=O)[C@@H]1C=C2[C@H](N(C1)C)Cc1c3c2cccc3n(c1)C)CC	Tr	1
Midazolam	Clc1cc2c(-n3c(CN=C2c2ccccc2F)cnc3C)cc1	Tr	1
Nalbuphine	O1[C@H]2[C@@]34CCN([C@@H](Cc5c3c1c(O)cc5)[C@]4(O)CC[C@@H]2O)CC1CCC1	Tr	1
Nefazodone	Clc1cc(N2CCN(CC2)CCCN2N=C(N(CCOc3ccccc3)C2=O)CC)ccc1	Tr	1
Nicorandil	O([N+](=O)[O-])CCNC(=O)c1cccnc1	Tr	1
Nicotine	n1cc(ccc1)[C@@H]1N(CCC1)C	Tr	1
Nilvadipine	O(C(=O)C=1[C@H](C(C(OC)=O)=C(NC=1C)C#N)c1cc([N+](=O)[O-])ccc1)C(C)C	Tr	1
Nitroxoline	Oc1c2ncccc2c([N+](=O)[O-])cc1	Tr	1
Norethindrone	O=C1CC[C@@H]2[C@@H]3[C@H]([C@@H]4CC[C@@](O)(C#C)[C@]4(CC3)C)CCC2=C1	Tr	1
Norgestimate	O(C(=O)C)[C@]1(CC[C@H]2[C@H]3[C@@H]([C@@H]4C(=C/C(=N/O)/CC4)CC3)CC[C@]12CC)C#C	Tr	1
Nortriptyline	N(CCC=C1c2c(CCc3c1cccc3)cccc2)C	Tr	1
Ofloxacin	Fc1cc2c3N(C=C(C(O)=O)C2=O)[C@@H](COc3c1N1CCN(CC1)C)C	Tr	1
Ondansetron	O=C1c2c(n(c3c2cccc3)C)CC[C@H]1Cn1ccnc1C	Tr	1
Orphenadrine	O([C@H](c1ccccc1C)c1ccccc1)CCN(C)C	Tr	1
Oxcarbazepine	O=C1Cc2c(N(c3c1cccc3)C(=O)N)cccc2	Tr	1
Oxybutynin	O(CC#CCN(CC)CC)C(=O)[C@](O)(C1CCCCC1)c1ccccc1	Tr	1
Oxyphenbutazone	Oc1ccc(N2N(C(=O)[C@H](CCCC)C2=O)c2ccccc2)cc1	Tr	1
Paroxetine	Fc1ccc(cc1)[C@@H]1CCNC[C@H]1COc1cc2OCOc2cc1	Tr	1
Pentobarbital	O=C1NC(=O)NC(=O)C1([C@@H](CCC)C)CC	Tr	1
Perphenazine	Clc1cc2N(c3c(Sc2cc1)cccc3)CCCN1CCN(CC1)CCO	Tr	1
Phenglutarimide	O=C1NC(=O)CC[C@@]1(CCN(CC)CC)c1ccccc1	Tr	1
Phenindione	O=C1c2c(cccc2)C(=O)C1c1ccccc1	Tr	1
Piroxicam	S1(=O)(=O)N(C)C(C(=O)Nc2ncccc2)=C(O)c2c1cccc2	Tr	1
Polythiazide	Clc1cc2N[C@H](N(S(=O)(=O)c2cc1S(=O)(=O)N)C)CSCC(F)(F)F	Tr	1
Probenecid	S(=O)(=O)(N(CCC)CCC)c1ccc(cc1)C(O)=O	Tr	1
Procarbazine	O=C(NC(C)C)c1ccc(cc1)CNNC	Tr	1
Propofol	Oc1c(cccc1C(C)C)C(C)C	Tr	1
Proxyphylline	O=C1N(C)C(=O)N(c2ncn(c12)C[C@@H](O)C)C	Tr	1
Pseudoephedrine	O[C@H]([C@@H](NC)C)c1ccccc1	Tr	1
Pyrazinamide	O=C(N)c1nccnc1	Tr	1
Remoxipride	Brc1ccc(OC)c(C(=O)NC[C@H]2N(CCC2)CC)c1OC	Tr	1
Repaglinide	O(CC)c1cc(ccc1C(O)=O)CC(=O)N[C@@H](CC(C)C)c1ccccc1N1CCCCC1	Tr	1
Salsalate	O(C(=O)c1ccccc1O)c1ccccc1C(O)=O	Tr	1
Selegiline	N([C@@H](Cc1ccccc1)C)(CC#C)C	Tr	1
Sudoxicam	s1ccnc1NC(=O)C=1N(S(=O)(=O)c2c(cccc2)C=1O)C	Tr	1
Sulfamethoxazole	S(=O)(=O)(Nc1noc(c1)C)c1ccc(N)cc1	Tr	1
Sulfinpyrazone	S(=O)(CCC1C(=O)N(N(C1=O)c1ccccc1)c1ccccc1)c1ccccc1	Tr	1
Tamoxifen	O(CCN(C)C)c1ccc(cc1)\C(=C(\CC)/c1ccccc1)\c1ccccc1	Tr	1
Tenoxicam	s1c2c(S(=O)(=O)N(C)C(C(=O)Nc3ncccc3)=C2O)cc1	Tr	1
Terfenadine	OC(C1CCN(CC1)CCC[C@@H](O)c1ccc(cc1)C(C)(C)C)(c1ccccc1)c1ccccc1	Tr	1
Tesaglitazar	S(Oc1ccc(cc1)CCOc1ccc(cc1)C[C@H](OCC)C(O)=O)(=O)(=O)C	Tr	1
Testosterone	O=C1CC[C@@]2([C@@H]3[C@H]([C@@H]4CC[C@H](O)[C@]4(CC3)C)CCC2=C1)C	Tr	1
Tilidine	O=C(CCC)[C@]1(CCC=C[C@@H]1N(C)C)c1ccccc1	Tr	1
Tinidazole	S(=O)(=O)(CCn1c(ncc1[N+](=O)[O-])C)CC	Tr	1
Tocainide	O=C(N(CC)CC)c1cccnc1	Tr	1
Toremifene	ClCC\C(=C(\c1ccc(OCCN(C)C)cc1)/c1ccccc1)\c1ccccc1	Tr	1
Triamcinolone	F[C@@]12[C@H]([C@@H]3C[C@@H](O)[C@](O)(C(=O)CO)[C@]3(C[C@@H]1O)C)CCC1=CC(=O)C=C[C@@]12C	Tr	1
Trifluoperazine	S1c2c(N(c3c1cccc3)CCCN1CCN(CC1)C)cc(cc2)C(F)(F)F	Tr	1
Trihexyphenidyl	O[C@@](CCN1CCCCC1)(C1CCCCC1)c1ccccc1	Tr	1
Trofosfamide	ClCCN1P(OCCC1)(=O)N(CCCl)CCCl	Tr	1
Zileuton	s1c2c(cc1[C@@H](N(O)C(=O)N)C)cccc2	Tr	1
Zomepirac	Clc1ccc(cc1)C(=O)c1n(C)c(cc1C)CC(O)=O	Tr	1
Zonisamide	S(=O)(=O)(N)Cc1noc2c1cccc2	Tr	1
Zotepine	Clc1cc2c(Sc3c(C=C2OCCN(C)C)cccc3)cc1	Tr	1
Acitretin	O(C)c1cc(C)c(\C=C\C(=C\C=C\C(=C/C(O)=O)\C)\C)c(C)c1C	Te	1
Alprazolam	Clc1cc2c(-n3c(nnc3C)CN=C2c2ccccc2)cc1	Te	1
Amikacin	O1[C@H](CN)[C@@H](O)[C@H](O)[C@@H](O)[C@H]1O[C@H]1[C@H](O)[C@@H](O[C@H]2O[C@H](CO)[C@@H](O)[C@H](N)[C@H]2O)[C@H](NC(=O)[C@H](O)CCN)C[C@@H]1N	Te	0
Aminoglutethimide	O=C1NC(=O)CC[C@]1(CC)c1ccc(N)cc1	Te	1
Azelastine	Clc1ccc(cc1)C[C@H]1NN([C@@H]2CCCN(CC2)C)C(=O)c2c1cccc2	Te	1
Betahistine	n1ccccc1CCNC	Te	1
Bicalutamide	S(=O)(=O)(c1c(C)c(cc(NC(=O)[C@H](O)C)c1C#N)C(F)(F)F)c1ccc(F)cc1	Te	1
Bifemelane	O(CCCCNC)c1ccccc1Cc1ccccc1	Te	1
Buspirone	O=C1N(CCCCN2CCN(CC2)c2ncccn2)C(=O)CC2(C1)CCCC2	Te	1
Capecitabine	FC1=CN([C@@H]2O[C@H](C)[C@@H](O)[C@H]2O)C(=O)N=C1NC(OCCCCC)=O	Te	1
Chlorambucil	ClCCN(CCCl)c1ccc(cc1)CCCC(O)=O	Te	1
Chloramphenicol	ClC(Cl)C(=O)N[C@@H]([C@H](O)c1ccc([N+](=O)[O-])cc1)CO	Te	1
Cinchonine	O[C@H]([C@@H]1N2C[C@@H]([C@H](C1)CC2)C=C)c1c2c(ncc1)cccc2	Te	1
Cinoxacin	O1c2c(OC1)cc1N(N=C(C(O)=O)C(=O)c1c2)CC	Te	1
Clobazam	Clc1cc2N(C(=O)CC(=O)N(c2cc1)C)c1ccccc1	Te	1
Codeine	O1[C@@H]2[C@]34[C@H]([C@H](N(CC3)C)Cc3c4c1c(OC)cc3)C=C[C@@H]2O	Te	1
Cyproheptadine	N1(CCC(CC1)=C1c2c(C=Cc3c1cccc3)cccc2)C	Te	1
Delmopinol	O1C[C@@H](N(CC1)CCO)CCCC(CCC)CCC	Te	1
Desipramine	N(CCCN1c2c(CCc3c1cccc3)cccc2)C	Te	1
Desmethyldiazepam	Clc1cc2c(NC(=O)CN=C2c2ccccc2)cc1	Te	1
Desogestrel	O[C@@]1(CC[C@H]2[C@H]3[C@@H]([C@@H]4C(CC3)=CCCC4)C(C[C@]12CC)=C)C#C	Te	1
Dextromoramide	O1CCN(CC1)C[C@H](C(C(=O)N1CCCC1)(c1ccccc1)c1ccccc1)C	Te	1
Diazoxide	Clc1cc2S(O)(=O)=NC(=Nc2cc1)C	Te	1
Diclofenac	Clc1cccc(Cl)c1Nc1ccccc1CC(O)=O	Te	1
Dienogest	O=C1CCC=2C(=C1)CC[C@H]1[C@@H]3CC[C@](O)(CC#N)[C@@]3(CCC1=2)C	Te	1
Doxepin	O1Cc2c(cccc2)\C(\c2c1cccc2)=C\CCN(C)C	Te	1
Erythromycin	O1[C@H](CC)[C@](O)(C)[C@H](O)[C@@H](C)C(=O)[C@@H](C[C@](O)(C)[C@H](O[C@@H]2O[C@@H](C[C@H](N(C)C)[C@H]2O)C)[C@@H](C)[C@H](O[C@@H]2O[C@@H](C)[C@H](O)[C@](OC)(C2)C)[C@@H](C)C1=O)C	Te	1
Estramustine	ClCCN(CCCl)C(Oc1cc2CC[C@H]3[C@@H]4CC[C@H](O)[C@]4(CC[C@@H]3c2cc1)C)=O	Te	1
Ethambutol	OC[C@@H](NCCN[C@@H](CC)CO)CC	Te	1
Ethionamide	S=C(N)c1cc(ncc1)CC	Te	1
Etoricoxib	Clc1cc(c(nc1)-c1ccc(nc1)C)-c1ccc(S(=O)(=O)C)cc1	Te	1
Fenfluramine	FC(F)(F)c1cc(ccc1)[C@H](CNCC)C	Te	1
Fenoprofen	O(c1cc(ccc1)[C@H](C(O)=O)C)c1ccccc1	Te	1
Flunisolide	F[C@H]1C2=CC(=O)C=C[C@@]2([C@@H]2[C@H]([C@H]3C[C@H]4OC(O[C@@]4(C(=O)CO)[C@]3(C[C@H]2O)C)(C)C)C1)C	Te	1
Flurazepam	Clc1cc2c(N(CCN(CC)CC)C(=O)CN=C2c2ccccc2F)cc1	Te	1
Gestodene	O=C1CC[C@@H]2[C@H]3[C@H]([C@@H]4C=C[C@](O)(C#C)[C@@]4(CC3)CC)CCC2=C1	Te	1
Gliquidone	S(=O)(=O)(NC(=O)NC1CCCCC1)c1ccc(cc1)CCN1C(=O)C(c2c(cc(OC)cc2)C1=O)(C)C	Te	1
Guanfacine	Clc1cccc(Cl)c1CC(=O)NC(N)=N	Te	1
Hydrochlorothiazide	Clc1cc2NCNS(=O)(=O)c2cc1S(=O)(=O)N	Te	1
Hydroxychloroquine	Clc1cc2nccc(N[C@@H](CCN(CCO)CC)C)c2cc1	Te	1
Imipramine	N(CCCN1c2c(CCc3c1cccc3)cccc2)(C)C	Te	1
Indoprofen	O=C1N(Cc2c1cccc2)c1ccc(cc1)[C@@H](C(O)=O)C	Te	1
Kanamycin	O1[C@@H](CN)[C@H](O)[C@H](O)[C@H](O)[C@H]1O[C@H]1[C@H](O)[C@@H](O[C@H]2O[C@@H](CO)[C@@H](O)[C@H](N)[C@H]2O)[C@H](N)C[C@@H]1N	Te	0
Ketazolam	Clc1cc2c(N(C)C(=O)CN3[C@@]2(OC(=CC3=O)C)c2ccccc2)cc1	Te	1
Labetalol	Oc1ccc(cc1C(=O)N)[C@H](O)CN[C@@H](CCc1ccccc1)C	Te	1
Levosimendan	O=C1NN=C([C@@H](C1)C)c1ccc(NN=C(C#N)C#N)cc1	Te	1
Linezolid	Fc1cc(N2C[C@@H](OC2=O)CNC(=O)C)ccc1N1CCOCC1	Te	1
Losartan	Clc1nc(n(Cc2ccc(cc2)-c2ccccc2-c2[nH]nnn2)c1CO)CCCC	Te	1
Maprotiline	N(CCCC12CCC(c3c1cccc3)c1c2cccc1)C	Te	1
Mebendazole	O(C(=O)Nc1[nH]c2cc(ccc2n1)C(=O)c1ccccc1)C	Te	1
Mestranol	O(C)c1cc2CC[C@H]3[C@@H]4CC[C@](O)(C#C)[C@]4(CC[C@@H]3c2cc1)C	Te	1
Methocarbamol	O(C[C@@H](O)COC(=O)N)c1ccccc1OC	Te	1
Metolazone	Clc1cc2N[C@H](N(c3ccccc3C)C(=O)c2cc1S(=O)(=O)N)C	Te	1
Metronidazole	OCCn1c(ncc1[N+](=O)[O-])C	Te	1
Moclobemide	Clc1ccc(cc1)C(=O)NCCN1CCOCC1	Te	1
Moxalactam	S(CC=1CO[C@H]2N(C=1C(=O)[O-])C(=O)[C@@]2(OC)NC(=O)[C@H](C(O)=O)c1ccc(O)cc1)c1nnnn1C	Te	0
Nafronyl	O1CCC[C@@H]1C[C@@H](Cc1cc2c(cc1)cccc2)C(OCCN(CC)CC)=O	Te	1
Naltrexone	O1[C@@H]2[C@@]34CCN([C@@H](Cc5c3c1c(O)cc5)[C@]4(O)CCC2=O)CC1CC1	Te	1
Naproxen	O(C)c1cc2c(cc(cc2)[C@@H](C(O)=O)C)cc1	Te	1
Naratriptan	S(=O)(=O)(NC)CCc1cc2cc([nH]c2cc1)C1CCN(CC1)C	Te	1
Nifedipine	O(C(=O)C)C=1[C@@H](C(C(OC)=O)=C(NC=1C)C)c1ccccc1[N+](=O)[O-]	Te	1
Nilutamide	FC(F)(F)c1cc(N2C(=O)C(NC2=O)(C)C)ccc1[N+](=O)[O-]	Te	1
Norgestrel	O=C1CC[C@@H]2[C@@H]3[C@H]([C@H]4CC[C@@](O)(C#C)[C@]4(C=C3)CC)CCC2=C1	Te	1
Oxatomide	O=C1Nc2c(N1CCCN1CCN(CC1)C(c1ccccc1)c1ccccc1)cccc2	Te	1
Oxprenolol	O(CC=C)c1ccccc1OC[C@H](O)CNC(C)C	Te	1
Penbutolol	O(C[C@@H](O)CNC(C)(C)C)c1ccccc1C1CCCC1	Te	1
Phenobarbital	O=C1NC(=O)NC(=O)C1(CC)c1ccccc1	Te	1
Phenprocoumon	O1c2c(cccc2)C(O)=C([C@H](CC)c2ccccc2)C1=O	Te	1
Phenylbutazone	O=C1N(N(C(=O)C1CCCC)c1ccccc1)c1ccccc1	Te	1
Pindolol	O(C[C@H](O)CNC(C)C)c1c2c([nH]cc2)ccc1	Te	1
Piroximone	O=C1NC(C(=O)c2ccncc2)=C(N1)CC	Te	1
Pizotyline	s1c2c(cc1)C(c1c(CC2)cccc1)=C1CCN(CC1)C	Te	1
Praziquantel	O=C1N2[C@H](c3c(CC2)cccc3)CN(C1)C(=O)C1CCCCC1	Te	1
Procyclidine	O[C@@](CCN1CCCC1)(C1CCCCC1)c1ccccc1	Te	1
Propiverine	O(C(=O)C(OCCC)(c1ccccc1)c1ccccc1)C1CCN(CC1)C	Te	1
Propoxyphene	O([C@]([C@@H](CN(C)C)C)(Cc1ccccc1)c1ccccc1)C(=O)CC	Te	1
Propylthiouracil	S=C1NC(=CC(=O)N1)CCC	Te	1
Quinagolide	S(=O)(=O)(N[C@@H]1C[C@H]2[C@@H](N(C1)CCC)Cc1c(C2)c(O)ccc1)N(CC)CC	Te	1
Reproterol	Oc1cc(cc(O)c1)[C@H](O)CNCCCn1c2c(nc1)N(C)C(=O)N(C)C2=O	Te	1
Rizatriptan	[nH]1cc(c2cc(ccc12)Cn1ncnc1)CCN(C)C	Te	1
Saccharin	S1(=O)(=O)NC(=O)c2c1cccc2	Te	1
Sorivudine	Br\C=C\C1=CN([C@@H]2O[C@H](CO)[C@@H](O)[C@@H]2O)C(=O)NC1=O	Te	1
Stavudine	O1[C@@H](C=C[C@@H]1N1C=C(C)C(=O)NC1=O)CO	Te	1
Sulfamethazine	S(=O)(=O)(Nc1nc(cc(n1)C)C)c1ccc(N)cc1	Te	1
Tamsulosin	S(=O)(=O)(N)c1cc(ccc1OC)C[C@H](NCCOc1ccccc1OCC)C	Te	1
Telmisartan	OC(=O)c1ccccc1-c1ccc(cc1)Cn1c2c(nc1CCC)c(cc(c2)-c1nc2c(n1C)cccc2)C	Te	1
Tetrabenazine	O(C)c1cc2CCN3[C@@H](CC(=O)[C@H](C3)CC(C)C)c2cc1OC	Te	1
Tiludronic_acid	Clc1ccc(cc1)CC(P(O)(O)=O)P(O)(O)=O	Te	0
Tolbutamide	S(=O)(=O)(NC(=O)NCCCC)c1ccc(cc1)C	Te	1
Tolmetin	OC(=O)Cc1n(C)c(cc1)C(=O)c1ccc(cc1)C	Te	1
Topiramate	S(OC[C@]12OC(O[C@H]1[C@@H]1OC(O[C@@H]1CO2)(C)C)(C)C)(=O)(=O)N	Te	1
Tramadol	O(C)c1cc(ccc1)[C@@]1(O)CCCC[C@@H]1CN(C)C	Te	1
Tranexamic_acid	OC(=O)C1CCC(CC1)CN	Te	1
Trazodone	Clc1cc(N2CCN(CC2)CCC[N+]2=Nc3[n+](cccc3)C2=O)ccc1	Te	1
Trimethoprim	O(C)c1c(OC)cc(cc1OC)Cc1cnc(nc1N)N	Te	1
Ximoprofen	OC(=O)[C@@H](C)c1ccc(cc1)[C@@H]1C\C(=N/O)\CCC1	Te	1
Zaleplon	O=C(N(CC)c1cc(ccc1)C=1n2ncc(c2N=CC=1)C#N)C	Te	1
Zanamivir	O1[C@@H]([C@H](O)[C@H](O)CO)[C@H](NC(=O)C)[C@@H](NC(N)=N)C=C1C(O)=O	Te	0

## Sheet: 578+392
Name	SMI	Class	label
AAFC	FC1=CN2[C@@H]3O[C@H](CO)[C@@H](O)[C@@H]3OC2=NC1=N	Tr	1
Amikacin	O1[C@H](CN)[C@@H](O)[C@H](O)[C@@H](O)[C@H]1O[C@H]1[C@H](O)[C@@H](O[C@H]2O[C@H](CO)[C@@H](O)[C@H](N)[C@H]2O)[C@H](NC(=O)[C@H](O)CCN)C[C@@H]1N	Tr	0
Arbekacin	O1[C@H](CO)[C@@H](O)[C@H](N)[C@@H](O)[C@H]1O[C@@H]1[C@@H](O)[C@H](O[C@H]2O[C@@H](CC[C@H]2N)CN)[C@@H](N)C[C@H]1NC(=O)[C@@H](O)CCN	Tr	0
Azlocillin	S1[C@H]2N([C@@H](C(O)=O)C1(C)C)C(=O)[C@H]2NC(=O)[C@H](NC(=O)N1CCNC1=O)c1ccccc1	Tr	0
Cefodizime	s1c(CC(O)=O)c(nc1SCC=1CS[C@H]2N(C=1C(O)=O)C(=O)[C@H]2NC(=O)\C(=N/OC)\c1nc(sc1)N)C	Tr	0
Gentamicin_C1a	O1[C@H](O[C@H]2[C@H](O)[C@@H](O[C@H]3OC[C@@](O)(C)[C@H](NC)[C@H]3O)[C@H](N)C[C@@H]2N)[C@H](N)CC[C@H]1CC	Tr	0
Lucifer_Yellow_CH	S(O)(=O)(=O)c1cc2c3c(cc(S(O)(=O)=O)cc3c1N)C(=O)N(NNC(=O)NN)C2=O	Tr	0
Meropenem	S([C@@H]1N[C@@H](CC1)C(=O)N(C)C)C=1[C@@H]([C@H]2N(C=1C(O)=O)C(=O)[C@@H]2[C@@H](O)C)C	Tr	0
Mezlocillin	S1[C@@H]2N([C@@H](C(O)=O)C1(C)C)C(=O)[C@@H]2NC(=O)[C@@H](NC(=O)N1CCN(S(=O)(=O)C)C1=O)c1ccccc1	Tr	0
Moxalactam	S(CC=1CO[C@H]2N(C=1C(=O)[O-])C(=O)[C@@]2(OC)NC(=O)[C@H](C(O)=O)c1ccc(O)cc1)c1nnnn1C	Tr	0
Netilmicin	O1[C@@H](O[C@H]2[C@H](O)[C@@H](O[C@H]3OC[C@@](O)(C)[C@H](NC)[C@H]3O)[C@H](NCC)C[C@@H]2N)[C@@H](N)CC=C1CN	Tr	0
Pentamidine	O(CCCCCOc1ccc(cc1)C(N)=N)c1ccc(cc1)C(N)=N	Tr	0
Raffinose	O1[C@](O[C@H]2O[C@H](CO[C@H]3O[C@H](CO)[C@H](O)[C@H](O)[C@H]3O)[C@@H](O)[C@H](O)[C@H]2O)(CO)[C@@H](O)[C@H](O)[C@H]1CO	Tr	0
Streptozocin	O1[C@H](CO)[C@@H](O)[C@H](O)[C@@H](NC(=O)N(N=O)C)[C@H]1O	Tr	0
Tobramycin	O1[C@H](CO)[C@@H](O)[C@H](N)[C@@H](O)[C@H]1O[C@@H]1[C@H](O)[C@H](O[C@H]2O[C@H](CN)[C@@H](O)C[C@H]2N)[C@@H](N)C[C@H]1N	Tr	0
Vancomycin	Clc1c2Oc3cc4[C@H](NC(=O)[C@@H](NC(=O)[C@@H](NC(=O)[C@H](NC)CC(C)C)[C@H](O)c(c1)cc2)CC(=O)N)C(=O)N[C@@H]1c2cc(-c5c(cc(O)cc5O)[C@H](NC(=O)[C@@H](NC1=O)[C@@H](O)c1cc(Cl)c(Oc(c4)c3O[C@@H]3O[C@H](CO)[C@H](O)[C@@H](O)[C@H]3O[C@H]3O[C@@H](C)[C@H](O)[C@@](N)(C3)C)cc1)C(O)=O)c(O)cc2	Tr	0
alcuronium chloride	OCC=C1C2C=3C4N(C=C5C6CC7[N+](CC6=CCO)(CCC67C5N(C=3)c3c6cccc3)CC=C)c3c(C45C([N+](C1)(CC5)CC=C)C2)cccc3	Tr	0
atracurium	O(C)c1cc(ccc1OC)CC1[N+](CCc2c1cc(OC)c(OC)c2)(CCC(OCCCCCOC(=O)CC[N+]1(CCc2c(cc(OC)c(OC)c2)C1Cc1cc(OC)c(OC)cc1)C)=O)C	Tr	0
bephenium	O(CC[N+](Cc1ccccc1)(C)C)c1ccccc1	Tr	0
bethanechol	O(C(C[N+](C)(C)C)C)C(=O)N	Tr	0
bretylium tosilate	Brc1ccccc1[CH-][N+](CC)(C)C	Tr	0
butylscopolamine	O1C2C3[N+](C(CC(OC(=O)C(CO)c4ccccc4)C3)C12)(CCCC)C	Tr	0
cefpirome	s1cc(nc1N)/C(=N/OC)/C(=O)NC1C2SCC(C[n+]3ccccc3)=C(N2C1=O)C(O)=O	Tr	0
ceftazidime	s1cc(nc1N)/C(=N/OC(C(O)=O)(C)C)/C(=O)NC1C2SCC(C[n+]3ccccc3)=C(N2C1=O)C(O)=O	Tr	0
diphemanil	[N+]1(CCC(CC1)=C(c1ccccc1)c1ccccc1)(C)C	Tr	0
distigmine	O(C(=O)N(CCCCCCN(C(Oc1ccc[n+](c1)C)=O)C)C)c1ccc[n+](c1)C	Tr	0
Edrophonium	Oc1cc([N+](CC)(C)C)ccc1	Tr	0
Gallamine	[I-].[I-].[I-].O(CC[N+](CC)(CC)CC)c1c(OCC[N+](CC)(CC)CC)cccc1OCC[N+](CC)(CC)CC	Tr	0
glycopyrrolate	O(C(=O)C(O)(C1CCCC1)c1ccccc1)C1CC[N+](C1)(C)C	Tr	0
ipratropium	O(C(=O)C(CO)c1ccccc1)C1CC2[N+](C(C1)CC2)(C(C)C)C	Tr	0
mivacurium	O(C)c1c(OC)cc(cc1OC)CC1[N+](CCc2c1cc(OC)c(OC)c2)(CCCOC(=O)CC\C=C\CCC(OCCC[N+]1(CCc2c(cc(OC)c(OC)c2)C1Cc1cc(OC)c(OC)c(OC)c1)C)=O)C	Tr	0
neostigmine bromide	O(C(=O)N(C)C)c1cc([N+](C)(C)C)ccc1	Tr	0
obidoxime	O(C[n+]1ccc(cc1)\C=N\O)C[n+]1ccc(cc1)\C=N\O	Tr	0
oxitropium	O1C2C3[N+](C(CC(OC(=O)C(CO)c4ccccc4)C3)C12)(CC)C	Tr	0
pancuronium	O(C(=O)C)C1C2(C(CC1[N+]1(CCCCC1)C)C1C(CC2)C2(CC([N+]3(CCCCC3)C)C(OC(=O)C)CC2CC1)C)C	Tr	0
pentolinium	[N+]1(CCCC1)(CCCCC[N+]1(CCCC1)C)C	Tr	0
poldine	O(CC1[N+](CCC1)(C)C)C(=O)C(O)(c1ccccc1)c1ccccc1	Tr	0
pralidoxime	O\N=C\c1[n+](cccc1)C	Tr	0
propantheline	O1c2c(cccc2)C(c2c1cccc2)C(OCC[N+](C(C)C)(C(C)C)C)=O	Tr	0
Trospium	O(C(=O)C(O)(c1ccccc1)c1ccccc1)C1C[C@@H]2[N+]3([C@H](C1)CC2)CCCC3	Tr	0
tubocurarine	O1c2cc3C([N+](CCc3cc2OC)(C)C)Cc2ccc(Oc3c4C([N+](CCc4cc(OC)c3O)(C)C)Cc3cc1c(O)cc3)cc2	Tr	0
vecuronium	O(C(=O)C)[C@@H]1[C@@]2([C@H]([C@H]3[C@H](CC2)[C@@]2([C@H](C[C@H](OC(=O)C)[C@@H](N4CCCCC4)C2)CC3)C)C[C@@H]1[N+]1(CCCCC1)C)C	Tr	0
Alendronic_acid	P(O)(O)(=O)C(P(O)(O)=O)(O)CCCN	Tr	0
Aztreonam	s1cc(nc1N)/C(=N\OC(C(O)=O)(C)C)/C(=O)N[C@H]1[C@@H](N(S(O)(=O)=O)C1=O)C	Tr	0
Ceftriaxone	s1cc(nc1N)/C(=N/OC)/C(=O)N[C@H]1[C@H]2SCC(CSC3=NC(=O)C(=O)NN3C)=C(N2C1=O)C(O)=O	Tr	0
Kanamycin	O1[C@@H](CN)[C@H](O)[C@H](O)[C@H](O)[C@H]1O[C@H]1[C@H](O)[C@@H](O[C@H]2O[C@@H](CO)[C@@H](O)[C@H](N)[C@H]2O)[C@H](N)C[C@@H]1N	Tr	0
Lactulose	O1[C@](O)(CO)[C@@H](O)[C@H](O[C@@H]2O[C@H](CO)[C@H](O)[C@H](O)[C@H]2O)[C@H]1CO	Tr	0
Risedronic_acid	P(O)(O)(=O)C(P(O)(O)=O)(O)Cc1cccnc1	Tr	0
Streptomycin	O1[C@@H](CO)[C@H](O)[C@H](O)[C@H](NC)[C@@H]1O[C@H]1[C@@](O)(C=O)[C@@H](O[C@@H]1O[C@@H]1[C@@H](NC(N)=N)[C@H](O)[C@@H](NC(N)=N)[C@H](O)[C@H]1O)C	Tr	0
Acarbose	O1[C@H](C)[C@@H](N[C@H]2C=C(CO)[C@@H](O)[C@H](O)[C@H]2O)[C@H](O)[C@@H](O)[C@H]1O[C@H]1[C@H](O)[C@@H](O)[C@H](O[C@@H]1CO)O[C@@H]([C@H](O)CO)[C@@H](O)[C@@H](O)C=O	Tr	0
Zanamivir	O1[C@@H]([C@H](O)[C@H](O)CO)[C@H](NC(=O)C)[C@@H](NC(N)=N)C=C1C(O)=O	Tr	0
Amphotericin B	O1[C@@H](C)[C@H](C)[C@H](O)[C@H](\C=C/C=C\C=C\C=C\C=C\C=C\C=C\[C@H](O[C@@H]2O[C@H](C)[C@@H](O)[C@H](N)[C@@H]2O)C[C@@H]2O[C@@](O)(C[C@H](O)[C@H]2C(O)=O)C[C@H](O)C[C@H](O)[C@@H](O)CC[C@@H](O)C[C@@H](O)CC1=O)C	Tr	0
Clodronate	ClC(Cl)(P(O)(O)=O)P(O)(O)=O	Tr	0
Nedocromil	O1c2c(cc3c(N(CC)C(=CC3=O)C(O)=O)c2CCC)C(=O)C=C1C(O)=O	Tr	0
Neomycin	O1[C@@H](CN)[C@@H](O)[C@H](O)[C@@H](N)[C@H]1O[C@H]1[C@@H](O)[C@@H](O[C@@H]1CO)O[C@@H]1[C@H](O[C@@H]2O[C@H](CN)[C@@H](O)[C@H](O)[C@H]2N)[C@@H](N)C[C@H](N)[C@@H]1O	Tr	0
Amygdalin	O1[C@H](CO)[C@@H](O)[C@H](O)[C@@H](O)[C@@H]1OC[C@H]1O[C@@H](O[C@H](C#N)c2ccccc2)[C@H](O)[C@@H](O)[C@@H]1O	Tr	0
Cefotaxime	s1cc(nc1N)/C(=N/OC)/C(=O)N[C@H]1[C@H]2SCC(COC(=O)C)=C(N2C1=O)C(O)=O	Tr	0
Chlorhexidine	Clc1ccc(NC(NC(NCCCCNC(NC(Nc2ccc(Cl)cc2)=N)=N)=N)=N)cc1	Tr	0
Diatrizoate	Ic1c(C(O)=O)c(I)c(NC(=O)C)c(I)c1NC(=O)C	Tr	0
Edetic_acid	OC(=O)CN(CCN(CC(O)=O)CC(O)=O)CC(O)=O	Tr	0
Etidronate	P(O)(O)(=O)C(P(O)(O)=O)(O)C	Tr	0
Gentamincin_C1	O1[C@H](O[C@H]2[C@H](O)[C@@H](O[C@H]3OC[C@@](O)(C)[C@H](NC)[C@H]3O)[C@H](N)C[C@@H]2N)[C@H](N)CC[C@H]1[C@H](NC)C	Tr	0
Imipenem	S(CCNC=N)C=1C[C@H]2N(C=1C(O)=O)C(=O)[C@@H]2[C@H](O)C	Tr	0
Iohexol	Ic1c(C(=O)NC[C@H](O)CO)c(I)c(N(C(=O)C)C[C@H](O)CO)c(I)c1C(=O)NC[C@H](O)CO	Tr	0
Iotroxic_acid	Ic1c(C(O)=O)c(I)cc(I)c1NC(=O)COCCOCCOCC(=O)Nc1c(I)c(C(O)=O)c(I)cc1I	Tr	0
Mitoxantrone	Oc1c2c(C(=O)c3c(C2=O)c(NCCNCCO)ccc3NCCNCCO)c(O)cc1	Tr	0
Moexipril_diacid	O(C)c1cc2C[C@H](N(Cc2cc1OC)C(=O)[C@@H](N[C@@H](CCc1ccccc1)C(O)=O)C)C(O)=O	Tr	0
Pamidronic_acid	P(O)(O)(=O)C(P(O)(O)=O)(O)CCN	Tr	0
Phthalylsulfathiazole	s1ccnc1NS(=O)(=O)c1ccc(NC(=O)c2ccccc2C(O)=O)cc1	Tr	0
Succinylsulfathiazole	s1ccnc1NS(=O)(=O)c1ccc(NC(=O)CCC(O)=O)cc1	Tr	0
Sulbactam	S1(=O)(=O)[C@H]2N([C@H](C(O)=O)C1(C)C)C(=O)C2	Tr	0
Ticarcillin	S1[C@H]2N([C@@H](C(O)=O)C1(C)C)C(=O)[C@H]2NC(=O)[C@H](C(O)=O)c1ccsc1	Tr	0
Tiludronic_acid	Clc1ccc(cc1)CC(P(O)(O)=O)P(O)(O)=O	Tr	0
Cefmetazole	S1[C@H]2N(C(C(O)=O)=C(C1)CSc1nnnn1C)C(=O)[C@@]2(OC)NC(=O)CSCC#N	Tr	0
Acamprosate	S(O)(=O)(=O)CCCNC(=O)C	Tr	0
Cilazaprilat	O=C1N2N(CCC[C@@H]1N[C@@H](CCc1ccccc1)C(O)=O)CCC[C@H]2C(O)=O	Tr	0
Lincomycin	S(C)[C@H]1O[C@H]([C@@H](NC(=O)[C@H]2N(C[C@@H](C2)CCC)C)[C@@H](O)C)[C@H](O)[C@H](O)[C@H]1O	Tr	0
Netivudine	O1[C@H](CO)[C@@H](O)[C@H](O)[C@@H]1N1C=C(C#CC)C(=O)NC1=O	Tr	0
Fosmidomycin	P(O)(O)(=O)CCCN(O)C=O	Tr	0
Nadolol	O(C[C@@H](O)CNC(C)(C)C)c1c2C[C@H](O)[C@H](O)Cc2ccc1	Tr	1
Dihydroergotamine	O1[C@](NC(=O)[C@@H]2C[C@H]3[C@H](N(C2)C)Cc2c4c3cccc4[nH]c2)(C)C(=O)N2[C@@H](Cc3ccccc3)C(=O)N3[C@@H](CCC3)[C@]12O	Tr	1
Erythromycin	O1[C@H](CC)[C@](O)(C)[C@H](O)[C@@H](C)C(=O)[C@@H](C[C@](O)(C)[C@H](O[C@@H]2O[C@@H](C[C@H](N(C)C)[C@H]2O)C)[C@@H](C)[C@H](O[C@@H]2O[C@@H](C)[C@H](O)[C@](OC)(C2)C)[C@@H](C)C1=O)C	Tr	1
Sulpiride	S(=O)(=O)(N)c1cc(C(=O)NC[C@H]2N(CCC2)CC)c(OC)cc1	Tr	1
Famotidine	s1cc(nc1N=C(N)N)CSCC/C(=N/S(=O)(=O)N)/N	Tr	1
Metaproterenol	Oc1cc(cc(O)c1)[C@H](O)CNC(C)C	Tr	1
Cymarin	O1CC(=CC1=O)[C@H]1CC[C@@]2(O)[C@H]3[C@H](CC[C@@]12C)[C@]1(CC[C@H](O[C@@H]2O[C@@H](C)[C@H](O)[C@H](OC)C2)C[C@@]1(O)CC3)C=O	Tr	1
Rimiterol	Oc1cc(ccc1O)[C@H](O)[C@@H]1NCCCC1	Tr	1
Atenolol	O(C[C@@H]([O-])C[N-]C(C)C)c1ccc(cc1)CC(=O)[N-2]	Tr	1
Cefpodoxime_proxetil	s1cc(nc1N)/C(=N\OC)/C(=O)N[C@H]1[C@H]2SCC(COC)=C(N2C1=O)C(O[C@H](OC(OC(C)C)=O)C)=O	Tr	1
Guanoxan	O1c2c(OC[C@H]1CNC(N)=N)cccc2	Tr	1
Trandolapril	O(CC)C(=O)[C@@H](N[C@H](C(=O)N1[C@@H]2[C@@H](C[C@H]1C(O)=O)CCCC2)C)CCc1ccccc1	Tr	1
Metformin	N(C(NC(N)=N)=N)(C)C	Tr	1
Eflornithine	FC(F)[C@](N)(CCCN)C(O)=O	Tr	1
Tranexamic_acid	OC(=O)C1CCC(CC1)CN	Tr	1
Valsartan	OC(=O)[C@@H](N(Cc1ccc(cc1)-c1ccccc1-c1[nH]nnn1)C(=O)CCCC)C(C)C	Tr	1
Dipyridamole	OCCN(CCO)c1nc(N2CCCCC2)c2nc(nc(N3CCCCC3)c2n1)N(CCO)CCO	Tr	1
Oxytetracycline	OC=1[C@@H](N(C)C)[C@H]2[C@@](O)(C(=O)C=1C(=O)N)C(=O)C=1[C@@H]([C@](O)(c3c(C=1O)c(O)ccc3)C)[C@@H]2O	Tr	1
Cilazapril	O=C1N2N(CCC[C@@H]1N[C@@H](CCc1ccccc1)C(OCC)=O)CCC[C@H]2C(O)=O	Tr	1
Fenoterol	Oc1cc(cc(O)c1)[C@H](O)CN[C@H](Cc1ccc(O)cc1)C	Tr	1
Ivermectin	O1[C@H]2C[C@@]3(O[C@@H]4[C@H](C3)[C@H](C)[C@@H]4[C@H](CC)C)O[C@H](C\C=C(\C)/[C@H](O[C@@H]3O[C@H](C)[C@@H](O[C@@H]4O[C@@H](C)[C@H](O)[C@@H](OC)C4)[C@H](OC)C3)[C@@H](\C=C\C=C\3/CO[C@@H]4[C@@H](O)C(=C[C@@H]([C@]/34O)C1=O)C)C)C2	Tr	1
Oxycodone	O1[C@@H]2[C@]34CCN([C@H](Cc5c3c1c(OC)cc5)[C@]4(O)CCC2=O)C	Tr	1
Pirbuterol	Oc1ccc(nc1CO)[C@H](O)CNC(C)(C)C	Tr	1
Ramipril	O(CC)C(=O)[C@@H](N[C@H](C(=O)N1[C@@H]2[C@H](C[C@H]1C(O)=O)CCC2)C)CCc1ccccc1	Tr	1
Reproterol	Oc1cc(cc(O)c1)[C@H](O)CNCCCn1c2c(nc1)N(C)C(=O)N(C)C2=O	Tr	1
Ziprasidone	Clc1cc2NC(=O)Cc2cc1CCN1CCN(CC1)c1nsc2c1cccc2	Tr	1
Furosemide	Clc1cc(NCc2occc2)c(cc1S(=O)(=O)N)C(O)=O	Tr	1
Sulfasalazine	S(=O)(=O)(Nc1ncccc1)c1ccc(\N=N\c2cc(C(O)=O)c(O)cc2)cc1	Tr	1
Terbutaline	Oc1cc(cc(O)c1)[C@H](O)CNC(C)(C)C	Tr	1
Metolazone	Clc1cc2N[C@H](N(c3ccccc3C)C(=O)c2cc1S(=O)(=O)N)C	Tr	1
Chlorthalidone	Clc1ccc(cc1S(=O)(=O)N)[C@@]1(O)NC(=O)c2c1cccc2	Tr	1
Tolrestat	S=C(N(CC(O)=O)C)c1c2c(ccc1)c(C(F)(F)F)c(OC)cc2	Tr	1
Hydroflumethiazide	S(=O)(=O)(N)c1cc2S(=O)(=O)NCNc2cc1C(F)(F)F	Tr	1
Sumatriptan	S(=O)(=O)(NC)Cc1cc2c([nH]cc2CCN(C)C)cc1	Tr	1
Hydrochlorothiazide	Clc1cc2NCNS(=O)(=O)c2cc1S(=O)(=O)N	Tr	1
Mibefradil	Fc1cc2c(cc1)[C@H](C(C)C)[C@](OC(=O)COC)(CC2)CCN(CCCc1[nH]c2c(n1)cccc2)C	Tr	1
Anagrelide	Clc1c2CN3CC(=O)NC3=Nc2ccc1Cl	Tr	1
Benserazide	Oc1c(O)c(O)ccc1CNNC(=O)[C@H](N)CO	Tr	1
Bromhexine	Brc1cc(Br)cc(CN(C)C2CCCCC2)c1N	Tr	1
Etodolac	O1CCc2c([nH]c3c2cccc3CC)[C@@]1(CC(O)=O)CC	Tr	1
Famciclovir	O(C(=O)C)CC(CCn1c2nc(ncc2nc1)N)COC(=O)C	Tr	1
Isocarboxazid	o1nc(cc1C)C(=O)NNCc1ccccc1	Tr	1
Mianserin	N12[C@@H](c3c(Cc4c1cccc4)cccc3)CN(CC2)C	Tr	1
Moxisylyte	O(C(=O)C)c1cc(C(C)C)c(OCCN(C)C)cc1C	Tr	1
Naratriptan	S(=O)(=O)(NC)CCc1cc2cc([nH]c2cc1)C1CCN(CC1)C	Tr	1
Pimozide	Fc1ccc(cc1)C(CCN1CCC(N2c3c(NC2=O)cccc3)CC1)c1ccc(F)cc1	Tr	1
Recainam	O=C(Nc1c(cccc1C)C)NCCCNC(C)C	Tr	1
Ceftizoxime	s1cc(nc1N)/C(=N/OC)/C(=O)N[C@H]1[C@H]2SCC=C(N2C1=O)C(O)=O	Tr	1
Cycloserine	O1NC(=O)[C@@H](N)C1	Tr	1
Desogestrel	O[C@@]1(CC[C@H]2[C@H]3[C@@H]([C@@H]4C(CC3)=CCCC4)C(C[C@]12CC)=C)C#C	Tr	1
Benzbromarone	Brc1cc(cc(Br)c1O)C(=O)c1c2c(oc1CC)cccc2	Tr	1
Quetiapine	S1c2c(cccc2)C(=Nc2c1cccc2)N1CCN(CC1)CCOCCO	Tr	1
Almotriptan	S(=O)(=O)(N1CCCC1)Cc1cc2c([nH]cc2CCN(C)C)cc1	Tr	1
Clavulanic_acid	O\1[C@H]2N([C@@H](C(O)=O)/C/1=C/CO)C(=O)C2	Tr	1
Estramustine	ClCCN(CCCl)C(Oc1cc2CC[C@H]3[C@@H]4CC[C@H](O)[C@]4(CC[C@@H]3c2cc1)C)=O	Tr	1
Ketoconazole	Clc1cc(Cl)ccc1[C@]1(O[C@@H](CO1)COc1ccc(N2CCN(CC2)C(=O)C)cc1)Cn1ccnc1	Tr	1
Mesna	S(O)(=O)(=O)CCS	Tr	1
Oseltamivir	O(C(CC)CC)[C@@H]1C=C(C[C@H](N)[C@H]1NC(=O)C)C(OCC)=O	Tr	1
Primidone	O=C1NCNC(=O)C1(CC)c1ccccc1	Tr	1
Propylthiouracil	S=C1NC(=CC(=O)N1)CCC	Tr	1
Ethylmorphine	O1[C@@H]2[C@]34[C@@H]([C@H](N(CC3)CC)Cc3c4c1c(O)cc3)C=C[C@@H]2O	Tr	1
Pantoprazole	S(=O)(Cc1nccc(OC)c1OC)c1[nH]c2c(n1)cc(OC(F)F)cc2	Tr	1
Sibutramine	Clc1ccc(cc1)C1(CCC1)[C@H](N(C)C)CC(C)C	Tr	1
Tolterodine	Oc1ccc(cc1[C@@H](CCN(C(C)C)C(C)C)c1ccccc1)C	Tr	1
Ethambutol	OC[C@@H](NCCN[C@@H](CC)CO)CC	Tr	1
Guanabenz	Clc1cccc(Cl)c1\C=N\NC(N)=N	Tr	1
Mefloquine	FC(F)(F)c1c2nc(cc(c2ccc1)[C@@H](O)[C@@H]1NCCCC1)C(F)(F)F	Tr	1
Urapidil	O(C)c1ccccc1N1CCN(CC1)CCCNC=1N(C)C(=O)N(C)C(=O)C=1	Tr	1
Zatebradin	O(C)c1cc(ccc1OC)CCN(CCCN1CCc2cc(OC)c(OC)cc2CC1=O)C	Tr	1
Metopirone	O=C(C(C)(C)c1cccnc1)c1cccnc1	Tr	1
Acetohexamide	S(=O)(=O)(NC(=O)NC1CCCCC1)c1ccc(cc1)C(=O)C	Tr	1
Allopurinol	Oc1ncnc2[nH]ncc12	Tr	1
Carvedilol	O(CCNC[C@@H](OCc1c2c3c([nH]c2ccc1)cccc3)O)c1ccccc1OC	Tr	1
Chlorpheniramine	Clc1ccc(N(CCN(C)C)c2ncccc2)cc1	Tr	1
Clonazepam	Clc1ccccc1C1=NCC(=O)Nc2c1cc([N+](=O)[O-])cc2	Tr	1
Cyproheptadine	N1(CCC(CC1)=C1c2c(C=Cc3c1cccc3)cccc2)C	Tr	1
Dantrolene	o1c(ccc1\C=N\N1CC(=O)NC1=O)-c1ccc([N+](=O)[O-])cc1	Tr	1
Enoximone	S(C)c1ccc(cc1)C(=O)C1=NC(=O)N=C1C	Tr	1
Floxacillin	Clc1cccc(F)c1-c1noc(C)c1C(=O)N[C@H]1[C@H]2SC(C)(C)[C@@H](N2C1=O)C(O)=O	Tr	1
Flunarizine	Fc1ccc(cc1)C(N1CCN(CC1)C\C=C\c1ccccc1)c1ccc(F)cc1	Tr	1
Flunisolide	F[C@H]1C2=CC(=O)C=C[C@@]2([C@@H]2[C@H]([C@H]3C[C@H]4OC(O[C@@]4(C(=O)CO)[C@]3(C[C@H]2O)C)(C)C)C1)C	Tr	1
Fluoxetine	FC(F)(F)c1ccc(O[C@H](CCNC)c2ccccc2)cc1	Tr	1
Guanadrel	O1[C@H](COC12CCCCC2)CNC(N)=N	Tr	1
Isoniazid	O=C(NN)c1ccncc1	Tr	1
Itraconazole	Clc1cc(Cl)ccc1[C@@]1(O[C@H](CO1)COc1ccc(N2CCN(CC2)c2ccc(N3C=NN([C@H](CC)C)C3=O)cc2)cc1)Cn1ncnc1	Tr	1
Losartan	Clc1nc(n(Cc2ccc(cc2)-c2ccccc2-c2[nH]nnn2)c1CO)CCCC	Tr	1
Mesalamine	Oc1ccc(N)cc1C(O)=O	Tr	1
Methadone	O=C(C(C[C@H](N(C)C)C)(c1ccccc1)c1ccccc1)CC	Tr	1
Methoxyamphetamine	O(C)c1cc(ccc1)C[C@H](N)C	Tr	1
Methylphenidate	O(C(=O)[C@@H]([C@@H]1NCCCC1)c1ccccc1)C	Tr	1
Modafinil	S(=O)(C(c1ccccc1)c1ccccc1)CC(=O)N	Tr	1
Nabumetone	O(C)c1cc2c(cc(cc2)CCC(=O)C)cc1	Tr	1
Omeprazole	S(=O)(Cc1ncc(C)c(OC)c1C)c1nc2cc(OC)ccc2[n-]1	Tr	1
Oxamniquine	OCc1cc2CC[C@H](Nc2cc1[N+](=O)[O-])CNC(C)C	Tr	1
Pizotyline	s1c2c(cc1)C(c1c(CC2)cccc1)=C1CCN(CC1)C	Tr	1
Pramipexole	s1c2C[C@@H](NCCC)CCc2nc1N	Tr	1
Quinidine	O(C)c1cc2c(nccc2[C@H](O)[C@H]2N3C[C@@H]([C@H](C2)CC3)C=C)cc1	Tr	1
Riboflavin	O=C1NC(=O)N=C2N(c3cc(C)c(cc3N=C12)C)C[C@@H](O)[C@@H](O)[C@@H](O)CO	Tr	1
Terbinafine	N(Cc1c2c(ccc1)cccc2)(C\C=C\C#CC(C)(C)C)C	Tr	1
Ticlopidine	Clc1ccccc1CN1CCc2sccc2C1	Tr	1
Trimeprazine	S1c2c(N(c3c1cccc3)C[C@H](CN(C)C)C)cccc2	Tr	1
Trimipramine	N(C[C@@H](CN1c2c(CCc3c1cccc3)cccc2)C)(C)C	Tr	1
Vitamin_A	OC\C=C(\C=C\C=C(\C=C\C=1C(CCCC=1C)(C)C)/C)/C	Tr	1
Flecainide	FC(F)(F)COc1ccc(OCC(F)(F)F)cc1C(=O)NC[C@@H]1NCCCC1	Tr	1
Piroximone	O=C1NC(C(=O)c2ccncc2)=C(N1)CC	Tr	1
Aspirin	O(C(=O)C)c1ccccc1C(O)=O	Tr	1
Ibutilide	S(=O)(=O)(Nc1ccc(cc1)[C@H](O)CCCN(CCCCCCC)CC)C	Tr	1
Methylprednisolone	O=C1C=C2[C@@]([C@@H]3[C@H]([C@@H]4CC[C@](O)(C(=O)CO)[C@]4(C[C@@H]3O)C)C[C@@H]2C)(C=C1)C	Tr	1
Mifobate	Clc1ccc(cc1)[C@H](P(OC)(OC)=O)OP(OC)(OC)=O	Tr	1
Sorivudine	Br\C=C\C1=CN([C@@H]2O[C@H](CO)[C@@H](O)[C@@H]2O)C(=O)NC1=O	Tr	1
Albuterol	Oc1ccc(cc1CO)[C@@H](O)CNC(C)(C)C	Tr	1
Milrinone	O=C1NC(C)=C(C=C1C#N)c1ccncc1	Tr	1
Nateglinide	OC(=O)[C@@H](NC(=O)C1CCC(CC1)C(C)C)Cc1ccccc1	Tr	1
Bromazepam	Brc1cc2c(NC(=O)CN=C2c2ncccc2)cc1	Tr	1
Propiverine	O(C(=O)C(OCCC)(c1ccccc1)c1ccccc1)C1CCN(CC1)C	Tr	1
Acebutolol	O(C[C@@H](O)CNC(C)C)c1ccc(NC(=O)CCC)cc1C(=O)C	Tr	1
Acetaminophen	Oc1ccc(NC(=O)C)cc1	Tr	1
Chlorguanide	Clc1ccc(NC(NC(NC(C)C)=N)=N)cc1	Tr	1
Dolasetron	O(C(=O)c1c2c([nH]c1)cccc2)C1C[C@@H]2N3[C@H](C1)CC(C2)C(=O)C3	Tr	1
Fenoprofen	O(c1cc(ccc1)[C@H](C(O)=O)C)c1ccccc1	Tr	1
Isoproterenol	Oc1cc(ccc1O)[C@H](O)NC(C)C	Tr	1
Lansoprazole	S(=O)(Cc1nccc(OCC(F)(F)F)c1C)c1[nH]c2c(n1)cccc2	Tr	1
Molecule-618	O(C)c1cc2c(nccc2[C@H](O)[C@@H]2N3C[C@@H]([C@H](C2)CC3)C=C)cc1	Tr	1
Oxyfedrine	O(C)c1cc(ccc1)C(=O)CCN[C@H]([C@@H](O)c1ccccc1)C	Tr	1
Piretanide	S(=O)(=O)(N)c1cc(cc(N2CCCC2)c1Oc1ccccc1)C(O)=O	Tr	1
Sulfamethizole	s1c(nnc1NS(=O)(=O)c1ccc(N)cc1)C	Tr	1
Triazolam	Clc1ccccc1C1=NCc2[nH+]nc(n2-c2c1cc(Cl)cc2)C	Tr	1
Zalcitabine	O1[C@@H](CC[C@@H]1N1C=CC(=NC1=O)N)CO	Tr	1
Lamivudine	S1C[C@@H](O[C@H]1CO)N1C=CC(=NC1=O)N	Tr	1
Topiramate	S(OC[C@]12OC(O[C@H]1[C@@H]1OC(O[C@@H]1CO2)(C)C)(C)C)(=O)(=O)N	Tr	1
Benzydamine	O(CCCN(C)C)c1nn(c2c1cccc2)Cc1ccccc1	Tr	1
Bupropion	Clc1cc(ccc1)C(=O)[C@H](NC(C)(C)C)C	Tr	1
Cimetidine	S(Cc1nc[nH]c1C)CCN\C(=N\C#N)\NC	Tr	1
Clindamycin	Cl[C@@H]([C@H](NC(=O)[C@H]1N(C[C@@H](C1)CCC)C)[C@H]1O[C@H](SC)[C@H](O)[C@@H](O)[C@H]1O)C	Tr	1
Clobazam	Clc1cc2N(C(=O)CC(=O)N(c2cc1)C)c1ccccc1	Tr	1
Acrivastine	OC(=O)\C=C\c1nc(ccc1)/C(=C/CN1CCCC1)/c1ccc(cc1)C	Tr	1
Disulfiram	S(SC(=S)N(CC)CC)C(=S)N(CC)CC	Tr	1
Metoclopramide	Clc1cc(C(=O)NCCN(CC)CC)c(OC)cc1N	Tr	1
Misoprostol	O=C1C[C@H](O)[C@H](\C=C\C[C@@](O)(CCCC)C)[C@H]1CCCCCCC(OC)=O	Tr	1
Moclobemide	Clc1ccc(cc1)C(=O)NCCN1CCOCC1	Tr	1
Moricizine	S1c2c(N(c3c1cccc3)C(=O)CCN1CCOCC1)cc(NC(OCC)=O)cc2	Tr	1
Moxonidine	Clc1nc(nc(OC)c1NC=1NCCN=1)C	Tr	1
Nitrendipine	O(C(=O)C=1[C@@H](C(C(OC)=O)=C(NC=1C)C)c1cc([N+](=O)[O-])ccc1)CC	Tr	1
Trovafloxacin	Fc1cc(F)ccc1N1C=C(C(O)=O)C(=O)c2cc(F)c(nc12)N1C[C@@H]2[C@H](C1)C2N	Tr	1
Chloramphenicol	ClC(Cl)C(=O)N[C@@H]([C@H](O)c1ccc([N+](=O)[O-])cc1)CO	Tr	1
Dihydrocodeine	O1[C@@H]2[C@]34[C@H]([C@H](N(CC3)C)Cc3c4c1c(OC)cc3)CC[C@@H]2O	Tr	1
Sultopride	S(=O)(=O)(CC)c1cc(C(=O)NC[C@H]2N(CCC2)CC)c(OC)cc1	Tr	1
Tenidap	Clc1cc\2c(N(C(=O)N)C(=O)/C/2=C(/O)\c2sccc2)cc1	Tr	1
Almitrine	Fc1ccc(cc1)C(N1CCN(CC1)c1nc(nc(n1)NCC=C)NCC=C)c1ccc(F)cc1	Tr	1
Alprazolam	Clc1cc2c(-n3c(nnc3C)CN=C2c2ccccc2)cc1	Tr	1
Amantadine	NC12CC3CC(C1)CC(C2)C3	Tr	1
Amphetamine	N[C@@H](Cc1ccccc1)C	Tr	1
Azatadine	n1c2c(CCc3c(cccc3)C2=C2CCN(CC2)C)ccc1	Tr	1
Betaxolol	O(C[C@@H](O)CNC(C)C)c1ccc(cc1)CCOCC1CC1	Tr	1
Bicalutamide	S(=O)(=O)(c1c(C)c(cc(NC(=O)[C@H](O)C)c1C#N)C(F)(F)F)c1ccc(F)cc1	Tr	1
Bisoprolol	O(C[C@@H](O)CNC(C)C)c1ccc(cc1)COCCOC(C)C	Tr	1
Chlorzoxazone	Clc1cc2NC(Oc2cc1)=O	Tr	1
Dapsone	S(=O)(=O)(c1ccc(N)cc1)c1ccc(N)cc1	Tr	1
Dexamethasone	F[C@@]12[C@H]([C@@H]3C[C@@H](C)[C@](O)(C(=O)CO)[C@]3(C[C@@H]1O)C)CCC1=CC(=O)C=C[C@@]12C	Tr	1
Diazoxide	Clc1cc2S(O)(=O)=NC(=Nc2cc1)C	Tr	1
Diethylstilbestrol	Oc1ccc(cc1)/C(=C(\CC)/c1ccc(O)cc1)/CC	Tr	1
Diflunisal	Fc1cc(F)ccc1-c1cc(C(O)=O)c(O)cc1	Tr	1
Diloxanide	ClC(Cl)C(=O)N(C)c1ccc(O)cc1	Tr	1
Ethacrynic_acid	Clc1c(Cl)c(OCC(O)=O)ccc1C(=O)C(=O)CC	Tr	1
Ethionamide	S=C(N)c1cc(ncc1)CC	Tr	1
Felbamate	O(CC(COC(=O)N)c1ccccc1)C(=O)N	Tr	1
Feprazone	O=C1N(N(C(=O)C1CC=C(C)C)c1ccccc1)c1ccccc1	Tr	1
Flutamide	FC(F)(F)c1cc(NC(=O)C(C)C)ccc1[N+](=O)[O-]	Tr	1
Fluvoxamine	FC(F)(F)c1ccc(cc1)/C(=N/OCCN)/CCCCOC	Tr	1
Hydroxychloroquine	Clc1cc2nccc(N[C@@H](CCN(CCO)CC)C)c2cc1	Tr	1
Hydroxyprogesterone_caproate	O=C1CC[C@@]2([C@@H]3[C@H]([C@@H]4CC[C@](OC(=O)CCCCC)(C(=O)C)[C@]4(CC3)C)C=CC2=C1)C	Tr	1
Isosorbide_dinitrate	O1[C@H]2[C@H](OC[C@@H]2O[N+](=O)[O-])[C@H](O[N+](=O)[O-])C1	Tr	1
Isotretinoin	OC(=O)\C=C(\C=C\C=C(\C=C/C=1C(CCCC=1C)(C)C)/C)/C	Tr	1
Ketotifen	s1c2c(cc1)C(c1c(CC2=O)cccc1)=C1CCN(CC1)C	Tr	1
Levosimendan	O=C1NN=C([C@@H](C1)C)c1ccc(NN=C(C#N)C#N)cc1	Tr	1
Loratadine	Clc1cc2c(cc1)C(c1ncccc1CC2)=C1CCN(CC1)C(OCC)=O	Tr	1
Mebeverine	O(C)c1cc(ccc1OC)C(OCCCCN([C@H](Cc1ccc(OC)cc1)C)CC)=O	Tr	1
Mefenamic_acid	OC(=O)c1ccccc1Nc1cccc(C)c1C	Tr	1
Meloxicam	s1c(cnc1NC(=O)C=1N(S(=O)(=O)c2c(cccc2)C=1O)C)C	Tr	1
Mestranol	O(C)c1cc2CC[C@H]3[C@@H]4CC[C@](O)(C#C)[C@]4(CC[C@@H]3c2cc1)C	Tr	1
Mifepristone	O=C1CCC2=C3[C@H]([C@@H]4CC[C@@](O)(C#C)[C@]4(C[C@@H]3c3ccc(N(C)C)cc3)C)CCC2=C1	Tr	1
Morphine	O1[C@@H]2[C@]34[C@H]([C@H](N(CC3)C)Cc3c4c1c(O)cc3)C=C[C@@H]2O	Tr	1
Moxifloxacin	Fc1cc2c(N(C=C(C(O)=O)C2=O)C2CC2)c(OC)c1N1C[C@H]2[C@H](NCCC2)C1	Tr	1
Nalidixic_acid	O=C1c2ccc(nc2N(C=C1C(O)=O)CC)C	Tr	1
Nifedipine	O(C(=O)C)C=1[C@@H](C(C(OC)=O)=C(NC=1C)C)c1ccccc1[N+](=O)[O-]	Tr	1
Nisoldipine	O(C(=O)C=1[C@H](C(C(OC)=O)=C(NC=1C)C)c1ccccc1[N+](=O)[O-])CC(C)C	Tr	1
Papaverine	O(C)c1cc(ccc1OC)Cc1nccc2c1cc(OC)c(OC)c2	Tr	1
Phenazopyridine	n1c(N)c(\N=N\c2ccccc2)ccc1N	Tr	1
Phenytoin	O=C1NC(=O)NC1(c1ccccc1)c1ccccc1	Tr	1
Pindolol	O(C[C@H](O)CNC(C)C)c1c2c([nH]cc2)ccc1	Tr	1
Protionamide	S=C(N)c1cc(ncc1)CCC	Tr	1
Quinalbarbitone	O=C1NC(=O)NC(=O)C1([C@H](CCC)C)CC=C	Tr	1
Rabeprazole	S(=O)(Cc1nccc(OCCCOC)c1C)c1[nH]c2c(n1)cccc2	Tr	1
Riluzole	s1c2cc(OC(F)(F)F)ccc2nc1N	Tr	1
Rizatriptan	[nH]1cc(c2cc(ccc12)Cn1ncnc1)CCN(C)C	Tr	1
Sparfloxacin	Fc1c(N2C[C@H](N[C@H](C2)C)C)c(F)c2N(C=C(C(O)=O)C(=O)c2c1N)C1CC1	Tr	1
Sulfisomidine	S(=O)(=O)(Nc1nc(nc(c1)C)C)c1ccc(N)cc1	Tr	1
Sulindac	S(=O)(C)c1ccc(cc1)\C=C/1\c2c(cc(F)cc2)C(CC(O)=O)=C\1C	Tr	1
Telithromycin	O1[C@@H](CC)[C@]2(OC(=O)N([C@H]2[C@@H](C)C(=O)[C@H](C[C@](OC)(C)[C@@H](O[C@@H]2O[C@H](C[C@H](N(C)C)[C@@H]2O)C)[C@@H](C)C(=O)[C@@H](C)C1=O)C)CCCCn1cc(nc1)-c1cccnc1)C	Tr	1
Telmisartan	OC(=O)c1ccccc1-c1ccc(cc1)Cn1c2c(nc1CCC)c(cc(c2)-c1nc2c(n1C)cccc2)C	Tr	1
Thiabendazole	s1cc(nc1)-c1[nH]c2c(n1)cccc2	Tr	1
Tiagabine	s1ccc(C)c1C(=CCCN1C[C@@H](CCC1)C(O)=O)c1sccc1C	Tr	1
Tibolone	O=C1CC=2C[C@H]([C@H]3[C@@H]4CC[C@](O)(C#C)[C@]4(CC[C@@H]3C=2CC1)C)C	Tr	1
Tolazoline	N1CCN=C1Cc1ccccc1	Tr	1
Tolbutamide	S(=O)(=O)(NC(=O)NCCCC)c1ccc(cc1)C	Tr	1
Triamcinolone_acetonide	F[C@@]12[C@H]([C@@H]3C[C@H]4OC(O[C@@]4(C(=O)CO)[C@]3(C[C@@H]1O)C)(C)C)CCC1=CC(=O)C=C[C@@]12C	Tr	1
Diltiazem	S1c2c(N(CCN(C)C)C(=O)[C@H](OC(=O)C)[C@@H]1c1ccc(OC)cc1)cccc2	Tr	1
Hydrocortisone	O=C1CC[C@@]2([C@@H]3[C@H]([C@@H]4CC[C@](O)(C(=O)CO)[C@]4(C[C@H]3O)C)CCC2=C1)C	Tr	1
Naloxone	O1[C@@H]2[C@]34CCN([C@H](Cc5c3c1c(O)cc5)[C@]4(O)CCC2=O)CC=C	Tr	1
Saccharin	S1(=O)(=O)NC(=O)c2c1cccc2	Tr	1
Terazosin	O1CCC[C@H]1C(=O)N1CCN(CC1)c1nc(N)c2cc(OC)c(OC)cc2n1	Tr	1
Isradipine	o1[nH][c+]2-[c+]([nH]1)cccc2[C@@H]1C(C(OC(C)C)=O)=C(NC(C)=C1C(OC)=O)C	Tr	1
Alprenolol	O(C[C@@H](O)CNC(C)C)c1ccccc1CC=C	Tr	1
Amrinone	O=C1NC=C(C=C1N)c1ccncc1	Tr	1
Codeine	O1[C@@H]2[C@]34[C@H]([C@H](N(CC3)C)Cc3c4c1c(OC)cc3)C=C[C@@H]2O	Tr	1
Scopolamine	O1[C@H]2[C@H]3N([C@@H]([C@@H]12)CC(OC(=O)[C@H](CO)c1ccccc1)C3)C	Tr	1
Tetrahydrocannabinol	O1c2c([C@H]3[C@@H](CCC(=C3)C)C1(C)C)c(O)cc(c2)CCCCC	Tr	1
Atropine	O(C(=O)[C@H](CO)c1ccccc1)C1C[C@@H]2N([C@H](C1)CC2)C	Tr	1
Clozapine	Clc1cc2N=C(N3CCN(CC3)C)c3c(Nc2cc1)cccc3	Tr	1
Dienogest	O=C1CCC=2C(=C1)CC[C@H]1[C@@H]3CC[C@](O)(CC#N)[C@@]3(CCC1=2)C	Tr	1
Felodipine	Clc1c(cccc1Cl)[C@@H]1C(C(OCC)=O)=C(NC(C)=C1C(OC)=O)C	Tr	1
Fluconazole	Fc1cc(F)ccc1C(O)(Cn1ncnc1)Cn1ncnc1	Tr	1
Nicotinic_acid	OC(=O)c1cccnc1	Tr	1
Acipimox	OC(=O)c1ncc([n+]([O-])c1)C	Tr	1
Acitretin	O(C)c1cc(C)c(\C=C\C(=C\C=C\C(=C/C(O)=O)\C)\C)c(C)c1C	Tr	1
Amitriptyline	N(CCC=C1c2c(CCc3c1cccc3)cccc2)(C)C	Tr	1
Amobarbital	O=C1[N-]C(=O)[N-]C(=O)C1(CCC(C)C)CC	Tr	1
Amoxapine	Clc1cc2c(Oc3c(N=C2N2CCNCC2)cccc3)cc1	Tr	1
Baclofen	Clc1ccc(cc1)[C@H](N)CCC(O)=O	Tr	1
Bifemelane	O(CCCCNC)c1ccccc1Cc1ccccc1	Tr	1
Carbimazole	S=C1N(C=CN1C)C(OCC)=O	Tr	1
Carteolol	O(C[C@@H](O)CNC(C)(C)C)c1c2CCC(=O)Nc2ccc1	Tr	1
Cephradine	S1[C@H]2N(C(C(O)=O)=C(C1)C)C(=O)[C@H]2NC(=O)[C@H](N)C=1CC=CCC=1	Tr	1
Chorpropamide	Clc1ccc(S(=O)(=O)NC(=O)NCCC)cc1	Tr	1
Cinoxacin	O1c2c(OC1)cc1N(N=C(C(O)=O)C(=O)c1c2)CC	Tr	1
Clomethiazole	ClCCc1scnc1C	Tr	1
Clomipramine	Clc1cc2N(c3c(CCc2cc1)cccc3)CCCN(C)C	Tr	1
Clonidine	Clc1cccc(Cl)c1N=C1NCCN1	Tr	1
Clopenthixol	Clc1cc\2c(Sc3c(cccc3)/C/2=C\CCN2CCN(CC2)CCO)cc1	Tr	1
Diethylpropion	O=C([C@@H](N(CC)CC)C)c1ccccc1	Tr	1
Disopyramide	O=C([N-2])[C@@](CCN(C(C)C)C(C)C)(c1ccccc1)c1ncccc1	Tr	1
Domperidone	Clc1cc2NC(=O)N(NC3CCN(CC3)CCCN3c4c(NC3=O)cccc4)c2cc1	Tr	1
Dothiepin	S1Cc2c(cccc2)\C(\c2c1cccc2)=C/CCN(C)C	Tr	1
Fenfluramine	FC(F)(F)c1cc(ccc1)[C@H](CNCC)C	Tr	1
Fludrocortisone_acetate	F[C@@]12[C@H]([C@@H]3CC[C@](O)(C(=O)COC(=O)C)[C@@]3(C[C@H]1O)C)CCC1=CC(=O)CC[C@]12C	Tr	1
Flumazenil	Fc1cc2c(-n3c(CN(C)C2=O)c(nc3)C(OCC)=O)cc1	Tr	1
Flurbiprofen	Fc1cc(ccc1-c1ccccc1)[C@H](C(O)=O)C	Tr	1
Galantamine	O1[C@@H]2[C@@]3(CCN(Cc4c3c1c(OC)cc4)C)C=C[C@H](O)C2	Tr	1
Gliquidone	S(=O)(=O)(NC(=O)NC1CCCCC1)c1ccc(cc1)CCN1C(=O)C(c2c(cc(OC)cc2)C1=O)(C)C	Tr	1
Glymidine	S(=O)(=O)(Nc1ncc(OCCOC)cn1)c1ccccc1	Tr	1
Hexobarbital	O=C1N(C)C(=O)NC(=O)[C@@]1(C)C=1CCCCC=1	Tr	1
Ketoprofen	OC(=O)[C@H](C)c1cc(ccc1)C(=O)c1ccccc1	Tr	1
Ketorolac	OC(=O)[C@H]1CCn2c1ccc2C(=O)c1ccccc1	Tr	1
Labetalol	Oc1ccc(cc1C(=O)N)[C@H](O)CN[C@@H](CCc1ccccc1)C	Tr	1
Levamisole	S1CCN2C[C@H](N=C12)c1ccccc1	Tr	1
Lorazepam	Clc1ccccc1C1=N[C@H](O)C(=O)Nc2c1cc(Cl)cc2	Tr	1
Methimazole	S=C1NC=CN1C	Tr	1
Metronidazole	OCCn1c(ncc1[N+](=O)[O-])C	Tr	1
Naltrexone	O1[C@@H]2[C@@]34CCN([C@@H](Cc5c3c1c(O)cc5)[C@]4(O)CCC2=O)CC1CC1	Tr	1
Nicardipine	O(C(=O)c1c(C2C=C(NC(=C2)C)C)c(C(OC)=O)c(cc1[N+](=O)[O-])C)CCN(Cc1ccccc1)C	Tr	1
Nitrazepam	O=C1Nc2c(cc([N+](=O)[O-])cc2)C(=NC1)c1ccccc1	Tr	1
Nitrofurantoin	o1c(ccc1[N+](=O)[O-])\C=N\N1CC(=O)NC1=O	Tr	1
Nizatidine	s1cc(nc1CN(C)C)CSCCN\C(\NC)=C/[N+](=O)[O-]	Tr	1
Oxprenolol	O(CC=C)c1ccccc1OC[C@H](O)CNC(C)C	Tr	1
Pefloxacin	Fc1cc2c(N(C=C(C(O)=O)C2=O)CC)cc1N1CCN(CC1)C	Tr	1
Pentazocine	Oc1cc2c(C[C@@H]3N(CC[C@@]2(C)[C@H]3C)CC=C(C)C)cc1	Tr	1
Pentoxifylline	O=C1N(CCCCC(=O)C)C(=O)N(c2ncn(c12)C)C	Tr	1
Perindopril	O(CC)C(=O)[C@H](N[C@@H](C(=O)N1[C@@H]2[C@H](C[C@H]1C(O)=O)CCCC2)C)CCC	Tr	1
Phenprocoumon	O1c2c(cccc2)C(O)=C([C@H](CC)c2ccccc2)C1=O	Tr	1
Phenylpropanolamine	O[C@H]([C@H](N)C)c1ccccc1	Tr	1
Practolol	O(C[C@@H](O)CNC(C)C)c1ccc(NC(=O)C)cc1	Tr	1
Promethazine	S1c2c(N(c3c1cccc3)C[C@H](N(C)C)C)cccc2	Tr	1
Propafenone	O(C[C@@H](O)CNCCC)c1ccccc1C(=O)CCc1ccccc1	Tr	1
Propoxyphene	O([C@]([C@@H](CN(C)C)C)(Cc1ccccc1)c1ccccc1)C(=O)CC	Tr	1
Propranolol	O(C[C@@H](O)CNC(C)C)c1c2c(ccc1)cccc2	Tr	1
Protriptyline	N(CCCC1c2c(C=Cc3c1cccc3)cccc2)C	Tr	1
Ritodrine	Oc1ccc(cc1)CCN[C@H]([C@@H](O)c1ccc(O)cc1)C	Tr	1
Sotalol	S(=O)(=O)(Nc1ccc(cc1)[C@@H](O)CNC(C)C)C	Tr	1
Sulfamethazine	S(=O)(=O)(Nc1nc(cc(n1)C)C)c1ccc(N)cc1	Tr	1
Sulfisoxazole	S(=O)(=O)(Nc1onc(C)c1C)c1ccc(N)cc1	Tr	1
Tacrine	n1c2c(CCCC2)c(N)c2c1cccc2	Tr	1
Temazepam	Clc1cc2c(N(C)C(=O)[C@@H](O)N=C2c2ccccc2)cc1	Tr	1
Timolol	s1nc(N2CCOCC2)c(OC[C@H](O)CNC(C)(C)C)n1	Tr	1
Tramadol	O(C)c1cc(ccc1)[C@@]1(O)CCCC[C@@H]1CN(C)C	Tr	1
Tropisetron	O(C(=O)c1c2c([nH]c1)cccc2)C1C[C@@H]2N([C@H](C1)CC2)C	Tr	1
Venlafaxine	O(C)c1ccc(cc1)[C@H](CN(C)C)C1([O-])CCCCC1	Tr	1
Zolpidem	O=C(N(C)C)Cc1n2C=C(C=Cc2nc1-c1ccc(cc1)C)C	Tr	1
Bumetanide	S(=O)(=O)(N)c1cc(cc(NCCCC)c1Oc1ccccc1)C(O)=O	Tr	1
Capecitabine	FC1=CN([C@@H]2O[C@H](C)[C@@H](O)[C@H]2O)C(=O)N=C1NC(OCCCCC)=O	Tr	1
Clofibrate	Clc1ccc(OC(C(OCC)=O)(C)C)cc1	Tr	1
Gatifloxacin	Fc1cc2c(N(C=C(C(O)=O)C2=O)C2CC2)c(OC)c1N1C[C@H](NCC1)C	Tr	1
Metoprolol	O(C[C@@H](O)CNC(C)C)c1ccc(cc1)CCOC	Tr	1
Minoxidil	[O-][n+]1c(N)cc(nc1N)N1CCCCC1	Tr	1
Praziquantel	O=C1N2[C@H](c3c(CC2)cccc3)CN(C1)C(=O)C1CCCCC1	Tr	1
Progesterone	O=C1CC[C@@]2([C@@H]3[C@H]([C@@H]4CC[C@H](C(=O)C)[C@]4(CC3)C)CCC2=C1)C	Tr	1
Torsemide	S(=O)(=O)(NC(=O)NC(C)C)c1cnccc1Nc1cc(ccc1)C	Tr	1
Trapidil	n12ncnc1N=C(C=C2N(CC)CC)C	Tr	1
Cotinine	O=C1N(C)[C@@H](CC1)c1cccnc1	Tr	1
Diclofenac	Clc1cccc(Cl)c1Nc1ccccc1CC(O)=O	Tr	1
Gallopamil	O(C)c1c(OC)cc(cc1OC)[C@@](C(C)C)(CCCN(CCc1cc(OC)c(OC)cc1)C)C#N	Tr	1
Gliclazide	S(=O)(=O)(NC(=O)NN1C[C@@H]2[C@H](CCC2)C1)c1ccc(cc1)C	Tr	1
Oxazepam	Clc1cc2c(NC(=O)[C@H](O)N=C2c2ccccc2)cc1	Tr	1
Risperidone	Fc1cc2onc(c2cc1)C1CCN(CC1)CCC=1C(=O)N2C(=NC=1C)CCCC2	Tr	1
Trimethoprim	O(C)c1c(OC)cc(cc1OC)Cc1cnc(nc1N)N	Tr	1
Antipyrine	O=C1N(N(C)C(=C1)C)c1ccccc1	Tr	1
Chlorpromazine	Clc1cc2N(c3c(Sc2cc1)cccc3)CCCN(C)C	Tr	1
Cisapride	Clc1cc(C(=O)N[C@@H]2CCN(C[C@@H]2OC)CCCOc2ccc(F)cc2)c(OC)cc1N	Tr	1
Cyproterone_acetate	ClC=1C2=CC(=O)[C@H]3[C@H](C3)[C@@]2([C@@H]2[C@H]([C@@H]3CC[C@](OC(=O)C)(C(=O)C)[C@]3(CC2)C)C=1)C	Tr	1
Delmopinol	O1C[C@@H](N(CC1)CCO)CCCC(CCC)CCC	Tr	1
Desipramine	N(CCCN1c2c(CCc3c1cccc3)cccc2)C	Tr	1
Glibornuride	S(=O)(=O)(NC(=O)N[C@@H]1[C@@H]2CC[C@](C)([C@@H]1O)C2(C)C)c1ccc(cc1)C	Tr	1
Glyburide	Clc1cc(C(=O)NCCc2ccc(S(=O)(=O)NC(=O)NC3CCCCC3)cc2)c(OC)cc1	Tr	1
Ibuprofen	OC(=O)[C@H](C)c1ccc(cc1)CC(C)C	Tr	1
Imatinib	O=C(Nc1cc(Nc2nc(ccn2)-c2cccnc2)c(cc1)C)c1ccc(cc1)CN1CCNCC1	Tr	1
Imipramine	N(CCCN1c2c(CCc3c1cccc3)cccc2)(C)C	Tr	1
Isoxepac	O1Cc2c(cccc2)C(=O)c2cc(ccc12)CC(O)=O	Tr	1
Lacidipine	O(C(=O)C=1C(C(C(OCC)=O)=C(NC=1C)C)c1ccccc1\C=C\C(OC(C)(C)C)=O)CC	Tr	1
Lamotrigine	Clc1c(cccc1Cl)-c1nnc(nc1N)N	Tr	1
Lidocaine	O=C(Nc1c(cccc1C)C)CN(CC)CC	Tr	1
Maprotiline	N(CCCC12CCC(c3c1cccc3)c1c2cccc1)C	Tr	1
Mexiletine	O(C[C@H](N)C)c1c(cccc1C)C	Tr	1
Nefopam	O1CCN(Cc2c(cccc2)[C@@H]1c1ccccc1)C	Tr	1
Oxaprozin	o1c(c(nc1CCC(O)=O)-c1ccccc1)-c1ccccc1	Tr	1
Pelrinone	O=C1NC(=NC(NCc2cccnc2)=C1C#N)C	Tr	1
Phenylbutazone	O=C1N(N(C(=O)C1CCCC)c1ccccc1)c1ccccc1	Tr	1
Rivastigmine	O(C(=O)N(CC)C)c1cc(ccc1)[C@@H](N(C)C)C	Tr	1
Ropinirole	O=C1Nc2c(C1)c(ccc2)CCN(CCC)CCC	Tr	1
Tolmesoxide	S(=O)(C)c1cc(OC)c(OC)cc1C	Tr	1
Valproic_acid	OC(=O)C(CCC)CCC	Tr	1
Ximoprofen	OC(=O)[C@@H](C)c1ccc(cc1)[C@@H]1C\C(=N/O)\CCC1	Tr	1
Zopiclone	Clc1ccc(nc1)N1[C@H](OC(=O)N2CCN(CC2)C)c2nccnc2C1=O	Tr	1
Caffeine	O=C1N(C)C(=O)N(c2ncn(c12)C)C	Tr	1
Chlordiazepoxide	Clc1cc2c(N=C(NC)C[N+]([O-])=C2c2ccccc2)cc1	Tr	1
Ciprofibrate	ClC1(Cl)C[C@@H]1c1ccc(OC(C(O)=O)(C)C)cc1	Tr	1
Desmethyldiazepam	Clc1cc2c(NC(=O)CN=C2c2ccccc2)cc1	Tr	1
Diazepam	Clc1cc2c(N(C)C(=O)CN=C2c2ccccc2)cc1	Tr	1
Fluorescein	O1C2(c3c(cccc3)C1=O)c1c(Oc3c2ccc(O)c3)cc(O)cc1	Tr	1
Lomefloxacin	Fc1c2N(C=C(C(O)=O)C(=O)c2cc(F)c1N1C[C@@H](NCC1)C)CC	Tr	1
Miconazole	Clc1cc(Cl)ccc1CO[C@H](Cn1ccnc1)c1ccc(Cl)cc1Cl	Tr	1
Naproxen	O(C)c1cc2c(cc(cc2)[C@@H](C(O)=O)C)cc1	Tr	1
Pheniramine	n1ccccc1[C@H](CCN(C)C)c1ccccc1	Tr	1
Prednisolone	O=C1C=C2CC[C@@H]3[C@@H]([C@]2(C=C1)C)[C@@H](O)C[C@]1([C@H]3CC[C@]1(O)C(=O)CO)C	Tr	1
Tiacrilast	S(C)c1cc2c(N=CN(\C=C\C(O)=O)C2=O)cc1	Tr	1
Tianeptine	Clc1cc2S(=O)(=O)N(c3c(N(c2cc1)CCCCCCC(O)=O)cccc3)C	Tr	1
Tolmetin	OC(=O)Cc1n(C)c(cc1)C(=O)c1ccc(cc1)C	Tr	1
Viloxazine	O1CCNC[C@@H]1COc1ccccc1OCC	Tr	1
Acetanilide	O=C(Nc1ccccc1)C	Tr	1
Acetazolamide	s1c(nnc1S(=O)(=O)N)NC(=O)C	Tr	1
Alfacalcidol	O[C@H]1C[C@H](O)C\C(=C/C=C\2/[C@@H]3CC[C@H]([C@@H](CCCC(C)C)C)[C@]3(CCC/2)C)\C1=C	Tr	1
Aminoglutethimide	O=C1NC(=O)CC[C@]1(CC)c1ccc(N)cc1	Tr	1
Aminopyrine	O=C1N(N(C)C(C)=C1N(C)C)c1ccccc1	Tr	1
Amosulalol	S(=O)(=O)(N)c1cc(ccc1[C@H](O)CNCCOc1ccccc1OC)C	Tr	1
Anastrozole	n1cn(nc1)Cc1cc(cc(c1)C(C#N)(C)C)C(C#N)(C)C	Tr	1
Astemizole	Fc1ccc(cc1)Cn1c2c(nc1NC1CCN(CC1)CCc1ccc(OC)cc1)cccc2	Tr	1
Azelastine	Clc1ccc(cc1)C[C@H]1NN([C@@H]2CCCN(CC2)C)C(=O)c2c1cccc2	Tr	1
Azimilide	Clc1ccc(cc1)-c1oc(cc1)\C=N\N1CC(=O)N(CCCCN2CCN(CC2)C)C1=O	Tr	1
Bendroflumethiazide	S(=O)(=O)(N)c1cc2S(=O)(=O)N[C@@H](Nc2cc1C(F)(F)F)Cc1ccccc1	Tr	1
Benorylate	O(C(=O)C)c1ccccc1C(Oc1ccc(NC(=O)C)cc1)=O	Tr	1
Bepridil	O(CC(C)C)C[C@@H](N(Cc1ccccc1)c1ccccc1)CN1CCCC1	Tr	1
Betahistine	n1ccccc1CCNC	Tr	1
Bezafibrate	Clc1ccc(cc1)C(=O)NCCc1ccc(OC(C(O)=O)(C)C)cc1	Tr	1
Biperiden	O[C@](CCN1CCCCC1)([C@H]1[C@@H]2C=C[C@H](C1)C2)c1ccccc1	Tr	1
Bornaprine	O(C(=O)[C@@]1([C@H]2CC[C@@H](C1)C2)c1ccccc1)CCCN(CC)CC	Tr	1
Budesonide	O1[C@]2([C@@H](O[C@@H]1CCC)C[C@H]1[C@H]3[C@@H]([C@@]4(C(=CC(=O)C=C4)CC3)C)[C@H](O)C[C@@]12C)C(=O)CO	Tr	1
Buspirone	O=C1N(CCCCN2CCN(CC2)c2ncccn2)C(=O)CC2(C1)CCCC2	Tr	1
Camazepam	Clc1cc2c(N(C)C(=O)[C@@H](OC(=O)N(C)C)N=C2c2ccccc2)cc1	Tr	1
Carbamazepine	O=C(N)N1c2c(C=Cc3c1cccc3)cccc2	Tr	1
Carmustine	ClCCN(N=O)C(=O)NCCCl	Tr	1
Chloral_hydrate	ClC(Cl)(Cl)C(O)O	Tr	1
Chlorambucil	ClCCN(CCCl)c1ccc(cc1)CCCC(O)=O	Tr	1
Chloroquine	Clc1cc2nccc(N[C@H](CCCN(CC)CC)C)c2cc1	Tr	1
Chlorphenesin	Clc1ccc(OC[C@@H](O)CO)cc1	Tr	1
Cicaprost	O[C@@H]1C[C@H]2[C@H](C\C(\C2)=C/COCC(O)=O)[C@H]1C#C[C@@H](O)[C@H](CC#CCC)C	Tr	1
Cilomilast	O(c1cc(ccc1OC)C1(CCC(CC1)C(O)=O)C#N)C1CCCC1	Tr	1
Cinchonine	O[C@H]([C@@H]1N2C[C@@H]([C@H](C1)CC2)C=C)c1c2c(ncc1)cccc2	Tr	1
Citalopram	Fc1ccc(cc1)[C@@]1(OCc2cc(ccc12)C#N)CCCN(C)C	Tr	1
Corticosterone	O=C1CC[C@@]2([C@@H]3[C@H]([C@@H]4CC[C@H](C(=O)CO)[C@]4(C[C@H]3O)C)CCC2=C1)C	Tr	1
Coumarin	O1c2c(C=CC1=O)cccc2	Tr	1
Cyclopenthiazide	Clc1cc2N[C@H](NS(=O)(=O)c2cc1S(=O)(=O)N)CC1CCCC1	Tr	1
Dextromoramide	O1CCN(CC1)C[C@H](C(C(=O)N1CCCC1)(c1ccccc1)c1ccccc1)C	Tr	1
Diacetylmorphine	O1[C@@H]2[C@]34[C@H]([C@H](N(CCC3)C)Cc3c4c1c(OC(=O)C)cc3)C=C[C@@H]2OC(=O)C	Tr	1
Dicyclomine	O(C(=O)C1(CCCCC1)C1CCCCC1)CCN(CC)CC	Tr	1
Dofetilide	S(=O)(=O)(Nc1ccc(cc1)CCN(CCOc1ccc(NS(=O)(=O)C)cc1)C)C	Tr	1
Doxazosin	O1c2c(OC[C@H]1C(=O)N1CCN(CC1)c1nc(N)c3cc(OC)c(OC)cc3n1)cccc2	Tr	1
Doxepin	O1Cc2c(cccc2)\C(\c2c1cccc2)=C\CCN(C)C	Tr	1
Ergotamine	O1[C@](NC(=O)[C@@H]2C=C3[C@H](N(C2)C)Cc2c4c3cccc4[nH]c2)(C)C(=O)N2[C@@H](Cc3ccccc3)C(=O)N3[C@@H](CCC3)[C@]12O	Tr	1
Ethinyl_Estradiol	Oc1cc2CC[C@H]3[C@@H]4CC[C@@](O)(C#C)[C@]4(CC[C@@H]3c2cc1)C	Tr	1
Ethyl_alcohol	OCC	Tr	1
Ethynodiol_diacetate	O(C(=O)C)[C@]1(CC[C@H]2[C@H]3[C@@H]([C@@H]4C(=C[C@@H](OC(=O)C)CC4)CC3)CC[C@]12C)C#C	Tr	1
Etoricoxib	Clc1cc(c(nc1)-c1ccc(nc1)C)-c1ccc(S(=O)(=O)C)cc1	Tr	1
Fenclofenac	Clc1cc(Cl)ccc1Oc1ccccc1CC(O)=O	Tr	1
Finasteride	O=C1N[C@@H]2CC[C@H]3[C@@H]4CC[C@H](C(=O)NC(C)(C)C)[C@]4(CC[C@@H]3[C@]2(C=C1)C)C	Tr	1
Flucytosine	Fc1cnc(O)nc1N	Tr	1
Flupentixol	S1c2c(cc(cc2)C(F)(F)F)\C(\c2c1cccc2)=C\CCN1CCN(CC1)CCO	Tr	1
Flurazepam	Clc1cc2c(N(CCN(CC)CC)C(=O)CN=C2c2ccccc2F)cc1	Tr	1
Fluvastatin	Fc1ccc(cc1)-c1c2c(n(C(C)C)c1\C=C\[C@@H](O)C[C@@H](O)CC(O)=O)cccc2	Tr	1
Fusidic_acid	O(C(=O)C)[C@H]/1C[C@]2([C@@H](C[C@@H](O)[C@H]3[C@@]2(CC[C@H]2[C@H](C)[C@H](O)CC[C@@]23C)C)\C\1=C(/CCC=C(C)C)\C(O)=O)C	Tr	1
Gemfibrozil	O(CCCC(C(O)=O)(C)C)c1cc(ccc1C)C	Tr	1
Genaconazole	S(=O)(=O)([C@@H]([C@@](O)(Cn1ncnc1)c1ccc(F)cc1F)C)C	Tr	1
Gestodene	O=C1CC[C@@H]2[C@H]3[C@H]([C@@H]4C=C[C@](O)(C#C)[C@@]4(CC3)CC)CCC2=C1	Tr	1
Glimepiride	S(=O)(=O)(NC(=O)NC1CCC(CC1)C)c1ccc(cc1)CCNC(=O)N1CC(C)=C(CC)C1=O	Tr	1
Glipizide	S(=O)(=O)(NC(=O)NC1CCCCC1)c1ccc(cc1)CCNC(=O)c1ncc(nc1)C	Tr	1
Glycine	OC(=O)CN	Tr	1
Granisetron	O=C(NC1C[C@@H]2N([C@H](C1)CCC2)C)c1nn(c2c1cccc2)C	Tr	1
Guanfacine	Clc1cccc(Cl)c1CC(=O)NC(N)=N	Tr	1
Haloperidol	Clc1ccc(cc1)C1(O)CCN(CC1)CCCC(=O)c1ccc(F)cc1	Tr	1
Hydralazine	n1ncc2c(cccc2)c1NN	Tr	1
Indobufen	O=C1N(Cc2c1cccc2)c1ccc(cc1)[C@@H](CC)C(O)=O	Tr	1
Indomethacin	Clc1ccc(cc1)C(=O)n1c2c(cc(OC)cc2)c(CC(O)=O)c1C	Tr	1
Indoprofen	O=C1N(Cc2c1cccc2)c1ccc(cc1)[C@@H](C(O)=O)C	Tr	1
Irbesartan	O=C1N(Cc2ccc(cc2)-c2ccccc2-c2nn[nH]n2)C(=NC12CCCC2)CCCC	Tr	1
Isosorbide-2-mononitrate	O1[C@H]2[C@H](OC[C@@H]2O)[C@@H](O[N+](=O)[O-])C1	Tr	1
Isoxicam	S1(=O)(=O)N(C)C(C(=O)Nc2noc(c2)C)=C(O)c2c1cccc2	Tr	1
Ketanserin	Fc1ccc(cc1)C(=O)C1CCN(CC1)CCN1C(=O)c2c(NC1=O)cccc2	Tr	1
Ketazolam	Clc1cc2c(N(C)C(=O)CN3[C@@]2(OC(=CC3=O)C)c2ccccc2)cc1	Tr	1
Letrozole	n1cn(nc1)C(c1ccc(cc1)C#N)c1ccc(cc1)C#N	Tr	1
Levetiracetam	O=C1N(CCC1)[C@H](CC)C(=O)N	Tr	1
Levobunolol	O(C[C@@H](O)CNC(C)(C)C)c1c2c(ccc1)C(=O)CCC2	Tr	1
Levonorgestrel	O=C1CC[C@@H]2[C@@H]3[C@H]([C@@H]4CC[C@@](O)(C#C)[C@]4(CC3)CC)CCC2=C1	Tr	1
Linezolid	Fc1cc(N2C[C@@H](OC2=O)CNC(=O)C)ccc1N1CCOCC1	Tr	1
Lisuride	O=C(N[C@H]1C=C2[C@H](N(C1)C)Cc1c3c2cccc3[nH]c1)N(CC)CC	Tr	1
Lormetazepam	Clc1ccccc1C1=N[C@H](O)C(=O)N(c2c1cc(Cl)cc2)C	Tr	1
Lornoxicam	Clc1sc2c(S(=O)(=O)N(C)C(C(=O)Nc3ncccc3)=C2O)c1	Tr	1
Lynestrenol	O[C@]1(CC[C@H]2[C@H]3[C@@H]([C@@H]4C(CC3)=CCCC4)CC[C@]12C)C#C	Tr	1
Mebendazole	O(C(=O)Nc1[nH]c2cc(ccc2n1)C(=O)c1ccccc1)C	Tr	1
Meclofenamic_acid	Clc1c(Nc2ccccc2C(O)=O)c(Cl)ccc1C	Tr	1
Megestrol_acetate	O=C1CC[C@@]2([C@@H]3[C@H]([C@@H]4CC[C@](OC(=O)C)(C(=O)C)[C@]4(CC3)C)C=C(C2=C1)C)C	Tr	1
Meperidine	O(C(=O)C1(CCN(CC1)C)c1ccccc1)CC	Tr	1
Meptazinol	Oc1cc(ccc1)[C@]1(CCCCN(C1)C)CC	Tr	1
Methocarbamol	O(C[C@@H](O)COC(=O)N)c1ccccc1OC	Tr	1
Methsuximide	O=C1N(C)C(=O)C[C@@]1(C)c1ccccc1	Tr	1
Methylergonovine	OC[C@@H](NC(=O)[C@@H]1C=C2[C@H](N(C1)C)Cc1c3c2cccc3[nH]c1)CC	Tr	1
Methysergide	OC[C@@H](NC(=O)[C@@H]1C=C2[C@H](N(C1)C)Cc1c3c2cccc3n(c1)C)CC	Tr	1
Midazolam	Clc1cc2c(-n3c(CN=C2c2ccccc2F)cnc3C)cc1	Tr	1
Nafronyl	O1CCC[C@@H]1C[C@@H](Cc1cc2c(cc1)cccc2)C(OCCN(CC)CC)=O	Tr	1
Nalbuphine	O1[C@H]2[C@@]34CCN([C@@H](Cc5c3c1c(O)cc5)[C@]4(O)CC[C@@H]2O)CC1CCC1	Tr	1
Nefazodone	Clc1cc(N2CCN(CC2)CCCN2N=C(N(CCOc3ccccc3)C2=O)CC)ccc1	Tr	1
Nicorandil	O([N+](=O)[O-])CCNC(=O)c1cccnc1	Tr	1
Nicotine	n1cc(ccc1)[C@@H]1N(CCC1)C	Tr	1
Nilutamide	FC(F)(F)c1cc(N2C(=O)C(NC2=O)(C)C)ccc1[N+](=O)[O-]	Tr	1
Nilvadipine	O(C(=O)C=1[C@H](C(C(OC)=O)=C(NC=1C)C#N)c1cc([N+](=O)[O-])ccc1)C(C)C	Tr	1
Nitroxoline	Oc1c2ncccc2c([N+](=O)[O-])cc1	Tr	1
Norethindrone	O=C1CC[C@@H]2[C@@H]3[C@H]([C@@H]4CC[C@@](O)(C#C)[C@]4(CC3)C)CCC2=C1	Tr	1
Norgestimate	O(C(=O)C)[C@]1(CC[C@H]2[C@H]3[C@@H]([C@@H]4C(=C/C(=N/O)/CC4)CC3)CC[C@]12CC)C#C	Tr	1
Norgestrel	O=C1CC[C@@H]2[C@@H]3[C@H]([C@H]4CC[C@@](O)(C#C)[C@]4(C=C3)CC)CCC2=C1	Tr	1
Nortriptyline	N(CCC=C1c2c(CCc3c1cccc3)cccc2)C	Tr	1
Ofloxacin	Fc1cc2c3N(C=C(C(O)=O)C2=O)[C@@H](COc3c1N1CCN(CC1)C)C	Tr	1
Ondansetron	O=C1c2c(n(c3c2cccc3)C)CC[C@H]1Cn1ccnc1C	Tr	1
Orphenadrine	O([C@H](c1ccccc1C)c1ccccc1)CCN(C)C	Tr	1
Oxatomide	O=C1Nc2c(N1CCCN1CCN(CC1)C(c1ccccc1)c1ccccc1)cccc2	Tr	1
Oxcarbazepine	O=C1Cc2c(N(c3c1cccc3)C(=O)N)cccc2	Tr	1
Oxybutynin	O(CC#CCN(CC)CC)C(=O)[C@](O)(C1CCCCC1)c1ccccc1	Tr	1
Oxyphenbutazone	Oc1ccc(N2N(C(=O)[C@H](CCCC)C2=O)c2ccccc2)cc1	Tr	1
Paroxetine	Fc1ccc(cc1)[C@@H]1CCNC[C@H]1COc1cc2OCOc2cc1	Tr	1
Penbutolol	O(C[C@@H](O)CNC(C)(C)C)c1ccccc1C1CCCC1	Tr	1
Pentobarbital	O=C1NC(=O)NC(=O)C1([C@@H](CCC)C)CC	Tr	1
Perphenazine	Clc1cc2N(c3c(Sc2cc1)cccc3)CCCN1CCN(CC1)CCO	Tr	1
Phenglutarimide	O=C1NC(=O)CC[C@@]1(CCN(CC)CC)c1ccccc1	Tr	1
Phenindione	O=C1c2c(cccc2)C(=O)C1c1ccccc1	Tr	1
Phenobarbital	O=C1NC(=O)NC(=O)C1(CC)c1ccccc1	Tr	1
Piroxicam	S1(=O)(=O)N(C)C(C(=O)Nc2ncccc2)=C(O)c2c1cccc2	Tr	1
Polythiazide	Clc1cc2N[C@H](N(S(=O)(=O)c2cc1S(=O)(=O)N)C)CSCC(F)(F)F	Tr	1
Probenecid	S(=O)(=O)(N(CCC)CCC)c1ccc(cc1)C(O)=O	Tr	1
Procarbazine	O=C(NC(C)C)c1ccc(cc1)CNNC	Tr	1
Procyclidine	O[C@@](CCN1CCCC1)(C1CCCCC1)c1ccccc1	Tr	1
Propofol	Oc1c(cccc1C(C)C)C(C)C	Tr	1
Proxyphylline	O=C1N(C)C(=O)N(c2ncn(c12)C[C@@H](O)C)C	Tr	1
Pseudoephedrine	O[C@H]([C@@H](NC)C)c1ccccc1	Tr	1
Pyrazinamide	O=C(N)c1nccnc1	Tr	1
Quinagolide	S(=O)(=O)(N[C@@H]1C[C@H]2[C@@H](N(C1)CCC)Cc1c(C2)c(O)ccc1)N(CC)CC	Tr	1
Remoxipride	Brc1ccc(OC)c(C(=O)NC[C@H]2N(CCC2)CC)c1OC	Tr	1
Repaglinide	O(CC)c1cc(ccc1C(O)=O)CC(=O)N[C@@H](CC(C)C)c1ccccc1N1CCCCC1	Tr	1
Salsalate	O(C(=O)c1ccccc1O)c1ccccc1C(O)=O	Tr	1
Selegiline	N([C@@H](Cc1ccccc1)C)(CC#C)C	Tr	1
Stavudine	O1[C@@H](C=C[C@@H]1N1C=C(C)C(=O)NC1=O)CO	Tr	1
Sudoxicam	s1ccnc1NC(=O)C=1N(S(=O)(=O)c2c(cccc2)C=1O)C	Tr	1
Sulfamethoxazole	S(=O)(=O)(Nc1noc(c1)C)c1ccc(N)cc1	Tr	1
Sulfinpyrazone	S(=O)(CCC1C(=O)N(N(C1=O)c1ccccc1)c1ccccc1)c1ccccc1	Tr	1
Tamoxifen	O(CCN(C)C)c1ccc(cc1)\C(=C(\CC)/c1ccccc1)\c1ccccc1	Tr	1
Tamsulosin	S(=O)(=O)(N)c1cc(ccc1OC)C[C@H](NCCOc1ccccc1OCC)C	Tr	1
Tenoxicam	s1c2c(S(=O)(=O)N(C)C(C(=O)Nc3ncccc3)=C2O)cc1	Tr	1
Terfenadine	OC(C1CCN(CC1)CCC[C@@H](O)c1ccc(cc1)C(C)(C)C)(c1ccccc1)c1ccccc1	Tr	1
Tesaglitazar	S(Oc1ccc(cc1)CCOc1ccc(cc1)C[C@H](OCC)C(O)=O)(=O)(=O)C	Tr	1
Testosterone	O=C1CC[C@@]2([C@@H]3[C@H]([C@@H]4CC[C@H](O)[C@]4(CC3)C)CCC2=C1)C	Tr	1
Tetrabenazine	O(C)c1cc2CCN3[C@@H](CC(=O)[C@H](C3)CC(C)C)c2cc1OC	Tr	1
Tilidine	O=C(CCC)[C@]1(CCC=C[C@@H]1N(C)C)c1ccccc1	Tr	1
Tinidazole	S(=O)(=O)(CCn1c(ncc1[N+](=O)[O-])C)CC	Tr	1
Tocainide	O=C(N(CC)CC)c1cccnc1	Tr	1
Toremifene	ClCC\C(=C(\c1ccc(OCCN(C)C)cc1)/c1ccccc1)\c1ccccc1	Tr	1
Trazodone	Clc1cc(N2CCN(CC2)CCC[N+]2=Nc3[n+](cccc3)C2=O)ccc1	Tr	1
Triamcinolone	F[C@@]12[C@H]([C@@H]3C[C@@H](O)[C@](O)(C(=O)CO)[C@]3(C[C@@H]1O)C)CCC1=CC(=O)C=C[C@@]12C	Tr	1
Trifluoperazine	S1c2c(N(c3c1cccc3)CCCN1CCN(CC1)C)cc(cc2)C(F)(F)F	Tr	1
Trihexyphenidyl	O[C@@](CCN1CCCCC1)(C1CCCCC1)c1ccccc1	Tr	1
Trofosfamide	ClCCN1P(OCCC1)(=O)N(CCCl)CCCl	Tr	1
Zaleplon	O=C(N(CC)c1cc(ccc1)C=1n2ncc(c2N=CC=1)C#N)C	Tr	1
Zileuton	s1c2c(cc1[C@@H](N(O)C(=O)N)C)cccc2	Tr	1
Zomepirac	Clc1ccc(cc1)C(=O)c1n(C)c(cc1C)CC(O)=O	Tr	1
Zonisamide	S(=O)(=O)(N)Cc1noc2c1cccc2	Tr	1
Zotepine	Clc1cc2c(Sc3c(C=C2OCCN(C)C)cccc3)cc1	Tr	1
cefamandole_nafate	S1[C@H]2N(C(C(=O)[O-])=C(C1)CSc1nnnn1C)C(=O)[C@H]2NC(=O)[C@H](OC=O)c1ccccc1	Te	0
ceforanide	S1[C@H]2N(C(C(O)=O)=C(C1)CSc1nnnn1CC(O)=O)C(=O)[C@H]2NC(=O)Cc1ccccc1CN	Te	0
cefoxitin sodium	s1cccc1CC(=O)NC1(OC)C2SCC(COC(=O)N)=C(N2C1=O)C(O)=O	Te	0
cephalothin	s1cccc1CC(=O)N[C@H]1[C@H]2SCC(COC(=O)C)=C(N2C1=O)C(O)=O	Te	0
colestipol	[NH2+](CC[NH2+]CC[NH3+])CC[NH2+]CC[NH3+]	Te	0
cysteamine	SCCN	Te	0
dapiprazole	n12CCCCc1nnc2CCN1CCN(CC1)c1ccccc1C	Te	0
daunorubicin hydrochloride	O1C(C)C(O)C(N)CC1OC1CC(O)(Cc2c1c(O)c1c(C(=O)c3c(C1=O)c(OC)ccc3)c2O)C(=O)C	Te	0
dopamine hydrochloride	Oc1cc(ccc1O)CCN	Te	0
epirubicin hydrochloride	O1C(C)C(O)C(N)CC1OC1CC(O)(Cc2c1c(O)c1c(C(=O)c3c(C1=O)c(OC)ccc3)c2O)C(=O)CO	Te	0
idoxuridine	IC1=CN(C2OC(CO)C(O)C2)C(=O)NC1=O	Te	0
iotroxate	Ic1c(NC(=O)COCCOCCOCC(=O)Nc2c(C(O)=O)c(I)cc(I)c2I)c(C(O)=O)c(I)cc1I	Te	0
leuprolide	Oc1ccc(cc1)CC(NC(=O)C(NC(=O)C(NC(=O)C(NC(=O)C1NC(=O)CC1)Cc1[nH]cnc1)Cc1c2c([nH]c1)cccc2)CO)C(=O)NC(C(C)C)C(=O)NC(C(C)C)C(=O)NC(CCCN=C(N)N)C(=O)N1CCCC1C(=O)NCC	Te	0
nafarelin	Oc1ccc(cc1)CC(NC(=O)C(NC(=O)C(NC(=O)C(NC(=O)C1NC(=O)CC1)Cc1[nH]cnc1)Cc1c2c([nH]c1)cccc2)CO)C(=O)NC(Cc1cc2c(cc1)cccc2)C(=O)NC(CC(C)C)C(=O)NC(CCCNC(N)=N)C(=O)N1CCCC1C(=O)NCC(=O)N	Te	0
octreoide	S1SCC(NC(=O)C(NC(=O)C(NC(=O)C(NC(=O)C(NC(=O)C(NC(=O)C(N)Cc2ccccc2)C1)Cc1ccccc1)Cc1c2c([nH]c1)cccc2)CCCCN)C(O)C)C(=O)NC(C(O)C)CO	Te	0
paromomycin	O1[C@@H](CN)[C@@H](O)[C@H](O)[C@@H](N)[C@H]1O[C@H]1[C@@H](O)[C@@H](O[C@@H]1CO)O[C@H]1[C@H](O[C@H]2O[C@H](CO)[C@@H](O)[C@H](O)[C@H]2N)[C@@H](N)C[C@@H](N)[C@@H]1O	Te	0
piperacillin	S1[C@H]2N([C@@H](C(O)=O)C1(C)C)C(=O)[C@H]2NC(=O)[C@H](NC(=O)N1CCN(CC)C(=O)C1=O)c1ccccc1	Te	0
suramin sodium	S(O)(=O)(=O)c1c2c(cc(S(O)(=O)=O)c1)c(S(O)(=O)=O)ccc2NC(=O)c1cc(NC(=O)c2cc(NC(=O)Nc3cc(ccc3)C(=O)Nc3cc(ccc3C)C(=O)Nc3c4c(cc(S(O)(=O)=O)cc4S(O)(=O)=O)c(S(O)(=O)=O)cc3)ccc2)c(cc1)C	Te	0
terlipressin	S1SCC(NC(=O)C(NC(=O)C(NC(=O)C(NC(=O)C(NC(=O)C(NC(=O)CNC(=O)CNC(=O)CN)C1)Cc1ccc(O)cc1)Cc1ccccc1)CCC(=O)N)CC(=O)N)C(=O)N1CCCC1C(=O)NC(CCCCN)C(=O)NCC(=O)N	Te	0
vidarabine	O1[C@H](CO)[C@@H](O)[C@H](O)[C@@H]1n1c2ncnc(N)c2nc1	Te	0
cromoglicate sodium	O1c2c(C(=O)C=C1C(O)=O)c(OCC(O)COc1c3c(OC(=CC3=O)C(O)=O)ccc1)ccc2	Te	0
sucralfate	S(OC1C(OS(=O)(=O)[O-])C(OC(OC2(OC(OS(=O)(=O)[O-])C(OS(=O)(=O)[O-])C2OS(=O)(=O)[O-])COS(=O)(=O)[O-])C1OS(=O)(=O)[O-])COS(=O)(=O)[O-])(=O)(=O)[O-]	Te	0
ouabain	O1C(C)C(O)C(O)C(O)C1OC1CC2(O)CCC3C(C2(CO)C(O)C1)C(O)CC1(C)C(CCC13O)C1=CC(OC1)=O	Te	0
deferoxamine	O=C(N(O)CCCCCNC(=O)CCC(=O)N(O)CCCCCN)CCC(=O)NCCCCCN(O)C(=O)C	Te	0
iothalamate sodium	Ic1c(C(=O)NC)c(I)c(NC(=O)C)c(I)c1C(O)=O	Te	0
teicoplanin	Clc1c2Oc3cc4C(NC(=O)C5NC(=O)C(NC(=O)C(N)c6cc(Oc7cc(O)cc5c7)c(O)cc6)Cc5cc(Cl)c(Oc(c4)c3O)cc5)C(=O)NC3c4cc(-c5c(cc(O)cc5O)C(NC(=O)C(NC3=O)C(O)c(c1)cc2)C(O)=O)c(O)cc4	Te	0
olsalazine	Oc1ccc(N\N=C\2/C=C(C(O)=O)C(=O)C=C/2)cc1C(O)=O	Te	0
cidofovir	P(O)(O)(=O)CO[C@@H](CN1C=CC(=NC1=O)N)CO	Te	0
latamoxef disodium	S(CC=1COC2N(C(=O)C2(OC)NC(=O)C(C(O)=O)c2ccc(O)cc2)C=1C(O)=O)c1nnnn1C	Te	0
pyrantel embonate	Oc1c(c2c(cc1C(O)=O)cccc2)Cc1c2c(cc(C(O)=O)c1O)cccc2	Te	0
albendazole	S(CCC)c1cc2[nH]c(nc2cc1)NC(OC)=O	Te	0
cefuroxime	S1[C@H]2N(C(C(O)=O)=C(C1)COC(=O)N)C(=O)[C@H]2NC(=O)\C(=N/OC)\c1occc1	Te	0
ganciclovir sodium	Oc1nc(nc2n(cnc12)COC(CO)CO)N	Te	0
hbed	Oc1ccccc1CN(CCN(Cc1ccccc1O)CC(O)=O)CC(O)=O	Te	0
physostigmine	O(C(=O)NC)c1cc2c(N([C@H]3N(CC[C@@]23C)C)C)cc1	Te	0
sennoside	O1C(CO)C(O)C(O)C(O)C1Oc1c2c(ccc1)C(c1c(C2=O)c(O)cc(c1)C(O)=O)C1c2c(C(=O)c3c1cccc3O)c(OC1OC(CO)C(O)C(O)C1O)ccc2	Te	0
atovaquone	Clc1ccc(cc1)C1CCC(CC1)C=1C(=O)C(=O)c2c(cccc2)C=1O	Te	0
probucol	S(C(Sc1cc(C(C)(C)C)c(O)c(c1)C(C)(C)C)(C)C)c1cc(C(C)(C)C)c(O)c(c1)C(C)(C)C	Te	0
xamoterol	O1CCN(CC1)C(=O)NCCNCC(O)COc1ccc(O)cc1	Te	0
levocarnitine	OC(CC(=O)[O-])C[N+](C)(C)C	Te	0
mecillinam	S1C2N(C(C(O)=O)C1(C)C)C(=O)C2N=CN1CCCCCC1	Te	0
penciclovir	O=C1N=C(Nc2n(cnc12)CCC(CO)CO)N	Te	0
sequestren	O=C([O-])CN(CCN(CC(=O)[O-])CC(=O)[O-])CC(=O)[O-]	Te	0
doxorubicin	O1[C@@H](C)[C@@H](O)[C@@H](N)C[C@@H]1O[C@@H]1c2c(C[C@](O)(C1)C(=O)CO)c(O)c1c(C(=O)c3c(cccc3OC)C1=O)c2O	Te	0
phenoperidine hydrochloride	O(C(=O)C1(CCN(CC1)CCC(O)c1ccccc1)c1ccccc1)CC	Te	0
azosemide	Clc1cc(NCc2sccc2)c(cc1S(=O)(=O)N)-c1nn[nH]n1	Te	0
eprosartan	s1cccc1C\C(=C/c1n(Cc2ccc(cc2)C(O)=O)c(nc1)CCCC)\C(O)=O	Te	0
melagatran	OC(=O)CN[C@@H](C(=O)N1CC[C@H]1C(=O)NCc1ccc(cc1)C(N)=N)C1CCCCC1	Te	0
pyridostigmine	O(C(=O)N(C)C)c1ccc[n+](c1)C	Te	0
tacrolimus	O1[C@H](/C(=C/[C@H]2C[C@@H](OC)[C@H](O)CC2)/C)[C@H](C)[C@@H](O)CC(=O)[C@@H](\C=C(/C[C@@H](C[C@H](OC)[C@H]2O[C@](O)([C@@H](C[C@@H]2OC)C)C(=O)C(=O)N2[C@@H](CCCC2)C1=O)C)\C)CC=C	Te	0
adefovir	P(O)(O)(=O)COCCn1c2ncnc(N)c2nc1	Te	0
etravirine	Brc1c(nc(nc1Oc1c(cc(cc1C)C#N)C)Nc1ccc(cc1)C#N)N	Te	0
iloprost	OC1CC2C(CC(C2)=CCCCC(O)=O)C1C=CC(O)C(CC#CC)C	Te	0
k-strophanthoside	O1C(COC2OC(CO)C(O)C(O)C2O)C(O)C(O)C(O)C1OC1C(OC)CC(OC1O)OC1CC2(O)CCC3C(CCC4(C)C(CCC34O)C3=CC(OC3)=O)C2(CC1)C=O	Te	0
mannitol	OC(C(O)C(O)CO)C(O)CO	Te	0
orlistat	O1[C@@H](C[C@@H](OC(=O)[C@@H](NC=O)CC(C)C)CCCCCCCCCCC)[C@H](CCCCCC)C1=O	Te	0
methylscopolamine	O1[C@H]2[C@H]3[N+]([C@@H]([C@@H]12)CC(OC(=O)[C@H](CO)c1ccccc1)C3)(C)C	Te	0
foscarnet	P(O)(O)(=O)C(O)=O	Te	0
indinavir sulfate	OC1Cc2c(cccc2)C1NC(=O)C(Cc1ccccc1)CC(O)CN1CCN(CC1C(=O)NC(C)(C)C)Cc1cccnc1	Te	0
aciclovir	Oc1nc(nc2n(cnc12)COCCO)N	Te	0
bambuterol	O(C(=O)N(C)C)c1cc(cc(OC(=O)N(C)C)c1)C(O)CNC(C)(C)C	Te	0
fluticasone-propionate	S(C(=O)C1(OC(=O)CC)C2(CC(O)C3(F)C(C2CC1C)CC(F)C1=CC(=O)C=CC13C)C)CF	Te	0
pranlukast	O1c2c(cccc2NC(=O)c2ccc(OCCCCc3ccccc3)cc2)C(=O)C=C1c1nn[nH]n1	Te	0
auranofin	SC1OC(COC(=O)C)C(OC(=O)C)C(OC(=O)C)C1OC(=O)C	Te	0
enalaprilat	OC(=O)[C@H]1N(CCC1)C(=O)[C@@H](N[C@@H](CCc1ccccc1)C(O)=O)C	Te	0
ergoloid_mesylate	O1C(NC(=O)C2CC3C(N(C2)C)Cc2c4c3cccc4[nH]c2)(C(C)C)C(=O)N2C(C(CC)(C)C)C(=O)N3C(CCC3)C12O	Te	0
lisinopril	OC(=O)C1N(CCC1)C(=O)C(NC(CCc1ccccc1)C(O)=O)CCCCN	Te	0
phenoxybenzamine hydrochloride	ClCCN(Cc1ccccc1)C(COc1ccccc1)C	Te	0
pirenzepine hydrochloride	O=C1Nc2cccnc2N(c2c1cccc2)C(=O)CN1CCN(CC1)C	Te	0
cyclosporin	O=C1N(C)C(C(O)C(C\C=C\C)C)C(=O)NC(CC)C(=O)N(CC(=O)N(C)C(CC(C)C)C(=O)NC(C(C)C)C(=O)N(C)C(CC(C)C)C(=O)NC(C)C(=O)NC(C)C(=O)N(C)C(CC(C)C)C(=O)N(C)C(CC(C)C)C(=O)N(C)C1C(C)C)C	Te	0
fluorouracil	FC1=CNC(=O)NC1=O	Te	0
pafenolol	O(CC(O)CNC(C)C)c1ccc(cc1)CCNC(=O)NC(C)C	Te	0
benzylpenicillin	S1[C@H]2N([C@@H](C(O)=O)C1(C)C)C(=O)[C@H]2NC(=O)Cc1ccccc1	Te	1
idarubicin hydrochloride	O1C(C)C(O)C(N)CC1OC1CC(O)(Cc2c1c(O)c1c(C(=O)c3c(cccc3)C1=O)c2O)C(=O)C	Te	1
penicillin g	S1C2N(C(C(O)=O)C1(C)C)C(=O)C2CC(=O)Cc1ccccc1	Te	1
reserpine	O(C)C1C(C2C(CC1OC(=O)c1cc(OC)c(OC)c(OC)c1)CN1C(C2)c2[nH]c3cc(OC)ccc3c2CC1)C(OC)=O	Te	1
saquinavir mesilate	OC(C(NC(=O)C(NC(=O)c1nc2c(cc1)cccc2)CC(=O)N)Cc1ccccc1)CN1CC2C(CC1C(=O)NC(C)(C)C)CCCC2	Te	1
amdinocillin	S1[C@H]2N([C@@H](C(O)=O)C1(C)C)C(=O)[C@H]2\N=C\N1CCCCCC1	Te	0
abiraterone_acetate	O(C(=O)C)[C@@H]1CC2=CC[C@H]3[C@@H]4CC=C([C@]4(CC[C@@H]3[C@]2(CC1)C)C)c1cccnc1	Te	1
fosfomycin	P(O)(O)(=O)C1O[C@H]1C	Te	1
lovastatin	O1[C@@H](C[C@@H](O)CC1=O)CC[C@@H]1[C@@H]2C(=C[C@@H](C[C@@H]2OC(=O)[C@H](CC)C)C)C=C[C@@H]1C	Te	1
fosinopril sodium	P(OC(OC(=O)CC)C(C)C)(=O)(CCCCc1ccccc1)CC(=O)N1CC(CC1C(O)=O)C1CCCCC1	Te	1
pravastatin	O(C(=O)[C@H](CC)C)[C@@H]1[C@H]2C(=C[C@@H](O)C1)C=C[C@H](C)[C@@H]2CC[C@@H](O)C[C@@H](O)CC(O)=O	Te	1
tioguanine	S=C1NC(=Nc2[nH]cnc12)N	Te	1
ampicillin	S1C2N(C(C(O)=O)C1(C)C)C(=O)C2NC(=O)C(N)c1ccccc1	Te	1
ascorbic acid	O1C(C(O)CO)C(=O)C(O)=C1O	Te	1
bromocriptine mesilate	Brc1[nH]c2c3c1CC1N(CC(C=C1c3ccc2)C(=O)NC1(OC2(O)N(C(CC(C)C)C(=O)N3C2CCC3)C1=O)C(C)C)C	Te	1
candoxatril	O(C(=O)[C@@H](CC1(CCCC1)C(=O)NC1CCC(CC1)C(O)=O)COCCOC)c1cc2CCCc2cc1	Te	1
ribavirin	O1[C@H](CO)[C@@H](O)[C@@H](O)[C@@H]1n1nc(nc1)C(=O)N	Te	1
ciclosporin	O=C1N(C)C(C(O)C(CC=CC)C)C(=O)NC(CC)C(=O)N(CC(=O)N(C)C(CC(C)C)C(=O)NC(C(C)C)C(=O)N(C)C(CC(C)C)C(=O)NC(C)C(=O)NC(C)C(=O)N(C)C(CC(C)C)C(=O)N(C)C(CC(C)C)C(=O)N(C)C1C(C)C)C	Te	1
didanosine	O1C(CCC1n1c2ncnc(O)c2nc1)CO	Te	1
etretinate	O(C)c1cc(C)c(C=CC(=CC=CC(=CC(OCC)=O)C)C)c(C)c1C	Te	1
frovatriptan	O=C(N)c1cc2c3C[C@H](NC)CCc3[nH]c2cc1	Te	1
mitotane	Clc1ccccc1C(C(Cl)Cl)c1ccc(Cl)cc1	Te	1
penicillamine	SC(C(N)C(O)=O)(C)C	Te	1
promazine	S1c2c(N(c3c1cccc3)CCCN(C)C)cccc2	Te	1
methyldopa	Oc1cc(ccc1O)CC(N)(C(O)=O)C	Te	1
cefcanel	s1c(nnc1SCC=1CS[C@H]2N(C=1C(O)=O)C(=O)[C@H]2NC(=O)[C@H](O)c1ccccc1)C	Te	1
benazepril	O=C1N(c2c(CCC1NC(CCc1ccccc1)C(OCC)=O)cccc2)CC(O)=O	Te	1
fluoxymesterone	F[C@@]12[C@H]([C@@H]3CC[C@@](O)(C)[C@]3(C[C@@H]1O)C)CCC1=CC(=O)CC[C@@]12C	Te	1
lercanidipine	O(C(=O)C=1C(C(C(OC)=O)=C(NC=1C)C)c1cc([N+](=O)[O-])ccc1)C(CN(CCC(c1ccccc1)c1ccccc1)C)(C)C	Te	1
delapril	O(CC)C(=O)[C@@H](N[C@H](C(=O)N(CC(O)=O)C1Cc2c(C1)cccc2)C)CCc1ccccc1	Te	1
cefetamet	s1cc(nc1N)/C(=N/OC)/C(=O)N[C@H]1[C@H]2SCC(C)=C(N2C1=O)C(O)=O	Te	1
chlorothiazide	Clc1cc2NC=NS(=O)(=O)c2cc1S(=O)(=O)N	Te	1
amiloride	Clc1nc(C(=O)\N=C(\N)/N)c(nc1N)N	Te	1
capreomycin	O=C/1N[C@@H]([C@@H]2NC(=NCC2)N)C(=O)NC[C@H](N)C(=O)N[C@@H](C)C(=O)N[C@@H](CNC(=O)C[C@@H](N)CCCN)C(=O)N\C\1=C\NC(=O)N	Te	1
clopidogrel	Clc1ccccc1[C@H](N1CCc2sccc2C1)C(OC)=O	Te	1
entacapone	Oc1c([N+](=O)[O-])cc(cc1O)\C=C(\C(=O)N(CC)CC)/C#N	Te	1
etoposide	O1C[C@H]2[C@@H]([C@@H](c3c(cc4OCOc4c3)[C@H]2O[C@@H]2O[C@H]3[C@@H](O[C@@H](OC3)C)[C@H](O)[C@H]2O)c2cc(OC)c(O)c(OC)c2)C1=O	Te	1
mercaptopurine	S=C1N=CNc2nc[nH]c12	Te	1
methylphenobarbital	O=C1N(C)C(=O)NC(=O)C1(CC)c1ccccc1	Te	1
ranitidine hydrochloride	S(Cc1oc(cc1)CN(C)C)CCNC(NC)=C[N+](=O)[O-]	Te	1
rifabutin	O1c2c3c4c(c(O)c2C)C(=O)C(NC(=O)C(=CC=CC(C)C(O)C(C)C(O)C(C)C(OC(=O)C)C(C)C(OC)C=COC1(C)C3=O)C)=C1NC2(N=C14)CCN(CC2)CC(C)C	Te	1
tegaserod	O(C)c1cc2c([nH]cc2\C=N\NC(NCCCCC)=N)cc1	Te	1
levomepromazine	S1c2c(N(c3c1cccc3)CC(CN(C)C)C)cc(OC)cc2	Te	1
troglitazone	S1C(Cc2ccc(OCC3(Oc4c(CC3)c(C)c(O)c(C)c4C)C)cc2)C(=O)NC1=O	Te	1
triamterene	n1c(N)c2nc(-c3ccccc3)c(nc2nc1N)N	Te	1
celiprolol hydrochloride	O(CC(O)CNC(C)(C)C)c1ccc(NC(=O)N(CC)CC)cc1C(=O)C	Te	1
levothyroxine sodium	Ic1cc(cc(I)c1Oc1cc(I)c(O)c(I)c1)CC(N)C(O)=O	Te	1
loxoprofen	O=C1CCCC1Cc1ccc(cc1)C(C(O)=O)C	Te	1
vigabatrin	OC(=O)CCC(N)C=C	Te	1
penicillin_v	S1[C@H]2N([C@@H](C(O)=O)C1(C)C)C(=O)[C@H]2NC(=O)COc1ccccc1	Te	1
sulphasalazine	S(=O)(=O)(Nc1ncccc1)c1ccc(N\N=C/2\C=C(C(O)=O)C(=O)C=C\2)cc1	Te	1
azithromycin	O1C(CC)C(O)(C)C(O)C(N(CC(CC(O)(C)C(OC2OC(CC(N(C)C)C2O)C)C(C)C(OC2OC(C)C(O)C(OC)(C2)C)C(C)C1=O)C)C)C	Te	1
carbidopa	Oc1cc(ccc1O)CC(NN)(C(O)=O)C	Te	1
cefixime	s1cc(nc1N)C(=NOCC(O)=O)C(=O)NC1C2SCC(C=C)=C(N2C1=O)C(O)=O	Te	1
chlortetracycline hydrochloride	Clc1c2c(C(=O)C=3C(CC4C(O)(C(=O)C(C(=O)N)=C(O)C4N(C)C)C=3O)C2(O)C)c(O)cc1	Te	1
gabapentin	OC(=O)CC1(CCCCC1)CN	Te	1
gestrinone	OC1(CCC2C3C(=C4C(=CC(=O)CC4)CC3)C=CC12CC)C#C	Te	1
pergolide mesilate	S(CC1CC2C(N(C1)CCC)Cc1c3c2cccc3[nH]c1)C	Te	1
progabide	Clc1ccc(cc1)/C(/NCCCC(=O)N)=C\1/C=C(F)C=CC/1=O	Te	1
quinapril hydrochloride	O(C(=O)C(NC(C(=O)N1Cc2c(CC1C(O)=O)cccc2)C)CCc1ccccc1)CC	Te	1
raloxifene	s1c2c(ccc(O)c2)c(C(=O)c2ccc(OCCN3CCCCC3)cc2)c1-c1ccc(O)cc1	Te	1
thioridazine	S1c2c(N(c3c1cccc3)CCC1N(CCCC1)C)cc(SC)cc2	Te	1
quinaprilat	OC(=O)[C@H]1N(Cc2c(C1)cccc2)C(=O)[C@@H](N[C@@H](CCc1ccccc1)C(O)=O)C	Te	1
enalapril	O(CC)C(=O)[C@H](N[C@@H](C(=O)N1CCC[C@H]1C(O)=O)C)CCc1ccccc1	Te	1
formoterol_fumarate	O(C)c1ccc(cc1)C[C@H](NC[C@H](O)c1cc(NC=O)c(O)cc1)C	Te	1
loperamide hydrochloride	Clc1ccc(cc1)C1(O)CCN(CC1)CCC(C(=O)N(C)C)(c1ccccc1)c1ccccc1	Te	1
sematilide	S(=O)(=O)(Nc1ccc(cc1)C(=O)NCCN(CC)CC)C	Te	1
vitamin_e	O1c2c(CC[C@]1(CCC[C@@H](CCC[C@@H](CCCC(C)C)C)C)C)c(C)c(O)c(C)c2C	Te	1
vismodegib	Clc1ccc(NC(=O)c2ccc(S(=O)(=O)C)cc2Cl)cc1-c1ncccc1	Te	1
bosentan	S(=O)(=O)(Nc1nc(nc(OCCO)c1Oc1ccccc1OC)-c1ncccn1)c1ccc(cc1)C(C)(C)C	Te	1
brompheniramine maleate	Brc1ccc(cc1)C(CCN(C)C)c1ncccc1	Te	1
imidapril	O=C1N(C(=O)[C@@H](N[C@@H](CCc2ccccc2)C(OCC)=O)C)[C@@H](CN1C)C(O)=O	Te	1
lorcainide	Clc1ccc(N(C(=O)Cc2ccccc2)C2CCN(CC2)C(C)C)cc1	Te	1
methotrexate	OC(=O)CC[C@H](NC(=O)c1ccc(N(Cc2nc3c(nc(nc3N)N)nc2)C)cc1)C(O)=O	Te	1
olopatadine_hydrochloride	O1Cc2c(cccc2)/C(/c2cc(ccc12)CC(O)=O)=C/CCN(C)C	Te	1
sulfapyridine	S(=O)(=O)(Nc1ncccc1)c1ccc(N)cc1	Te	1
tocopheryl acetat	O1c2c(CCC1(CCCC(CCCC(CCCC(C)C)C)C)C)c(C)c(OC(=O)C)c(C)c2C	Te	1
norfloxacin	Fc1cc2c(N(C=C(C(O)=O)C2=O)CC)cc1N1CCNCC1	Te	1
prazosin	o1cccc1C(=O)N1CCN(CC1)c1nc(N)c2cc(OC)c(OC)cc2n1	Te	1
chlortalidone	Clc1ccc(cc1S(=O)(=O)N)C1(O)NC(=O)c2c1cccc2	Te	1
ciprofloxacin	Fc1cc2c(N(C=C(C(O)=O)C2=O)C2CC2)cc1N1CCNCC1	Te	1
spironolactone	S(C(=O)C)[C@H]1[C@H]2[C@@H]3CC[C@]4(OC(=O)CC4)[C@]3(CC[C@@H]2[C@@]2(C(=CC(=O)CC2)C1)C)C	Te	1
cefatrizine	S1[C@H]2N(C(C(O)=O)=C(C1)CSc1n[nH]nc1)C(=O)[C@H]2NC(=O)[C@H](N)c1ccc(O)cc1	Te	1
clavulanate potassium	O1C2N(C(C(O)=O)C1=CCO)C(=O)C2	Te	1
cloxacillin	Clc1ccccc1-c1noc(C)c1C(=O)N[C@H]1[C@H]2SC(C)(C)[C@@H](N2C1=O)C(O)=O	Te	1
fludarabine-phosphate	P(OCC1OC(n2c3nc(F)nc(N)c3nc2)C(O)C1O)(O)(O)=O	Te	1
folic-acid	O=C1N=C(Nc2ncc(nc12)CNc1ccc(cc1)C(=O)NC(CCC(O)=O)C(O)=O)N	Te	1
lodoxamide trometamol	Clc1c(NC(=O)C(O)=O)cc(cc1NC(=O)C(O)=O)C#N	Te	1
oxiracetam	OC1CC(=O)N(C1)CC(=O)N	Te	1
rilpivirine	n1c(Nc2c(cc(cc2C)\C=C\C#N)C)ccnc1Nc1ccc(cc1)C#N	Te	1
saxagliptin	OC12CC3(CC(C1)CC(C3)C2)[C@H](N)C(=O)N1[C@@H]2[C@H](C[C@H]1C#N)C2	Te	1
xipamide	Clc1cc(O)c(cc1S(=O)(=O)N)C(=O)Nc1c(cccc1C)C	Te	1
carboplatin	[Pt]1OC(=O)C2(CCC2)C(O1)=O.N.N	Te	1
mercaptoethanesulfonic acid	S(O)(=O)(=O)CCS	Te	1
apricitabine	S1[C@@H](OC[C@@H]1N1C=CC(=NC1=O)N)CO	Te	1
chlorphenamine maleate	Clc1ccc(cc1)C(CCN(C)C)c1ncccc1	Te	1
cinacalcet	FC(F)(F)c1cc(ccc1)CCCN[C@H](C)c1c2c(ccc1)cccc2	Te	1
clenbuterol	Clc1cc(cc(Cl)c1N)C(O)CNC(C)(C)C	Te	1
digoxin	O1C(C)C(OC2OC(C)C(O)C(O)C2)C(O)CC1OC1C(OC(OC2CC3CCC4C(CC(O)C5(C)C(CCC45O)C4=CC(OC4)=O)C3(CC2)C)CC1O)C	Te	1
etofylline	O=C1N(C)C(=O)N(c2ncn(c12)CCO)C	Te	1
fenbufen	OC(=O)CCC(=O)c1ccc(cc1)-c1ccccc1	Te	1
flucloxacillin	Clc1cccc(F)c1-c1noc(C)c1C(=O)N[C@H]1[C@H]2SC(C)(C)[C@@H](N2C1=O)C(O)=O	Te	1
flunitrazepam	Fc1ccccc1C1=NCC(=O)N(c2c1cc([N+](=O)[O-])cc2)C	Te	1
hydrocodone	O1[C@@H]2[C@]34[C@H]([C@H](N(CC3)C)Cc3c4c1c(OC)cc3)CCC2=O	Te	1
hydroxyzine	Clc1ccc(cc1)C(N1CCN(CC1)CCOCCO)c1ccccc1	Te	1
leflunomide	FC(F)(F)c1ccc(NC(=O)c2cnoc2C)cc1	Te	1
metyrapone	O=C(C(C)(C)c1cccnc1)c1cccnc1	Te	1
mirtazapine	n1c2N3C(c4c(Cc2ccc1)cccc4)CN(CC3)C	Te	1
perhexiline	N1CCCCC1CC(C1CCCCC1)C1CCCCC1	Te	1
pizotifen malate	s1c2c(cc1)C(c1c(CC2)cccc1)=C1CCN(CC1)C	Te	1
retinol	OCC=C(C=CC=C(C=CC=1C(CCCC=1C)(C)C)C)C	Te	1
rifampin	O1c2c3c4c(c(O)c2C)c(O)c(NC(=O)\C(=C\C=C\C(C)C(O)C(C)C(O)C(C)C(OC(=O)C)C(C)C(OC)\C=C/OC1(C)C3=O)\C)c(\C=N\N1CCN(CC1)C)c4O	Te	1
tetracycline	OC=1[C@@H](N(C)C)[C@@H]2C[C@H]3C(=C(O)[C@]2(O)C(=O)C=1C(=O)N)C(=O)c1c(cccc1O)[C@]3(O)C	Te	1
trimethobenzamide	O(C)c1c(OC)cc(cc1OC)C(=O)NCc1ccc(OCCN(C)C)cc1	Te	1
desvenlafaxine_succinate	OC1(CCCCC1)C(CN(C)C)c1ccc(O)cc1	Te	1
sulfamerazine	S(=O)(=O)(Nc1nc(ccn1)C)c1ccc(N)cc1	Te	1
ethylbenzene	c1ccccc1CC	Te	1
fenofibrate	Clc1ccc(cc1)C(=O)c1ccc(OC(C(OC(C)C)=O)(C)C)cc1	Te	1
mepindolol	O(CC(O)CNC(C)C)c1c2cc([nH]c2ccc1)C	Te	1
cyclophosphamide	ClCCN(P1(OCCCN1)=O)CCCl	Te	1
mycophenolic_acid	O1Cc2c(c(O)c(C\C=C(\CCC(O)=O)/C)c(OC)c2C)C1=O	Te	1
acetylprocainamide	O=C(NCCN(CC)CC)c1ccc(NC(=O)C)cc1	Te	1
pioglitazone	S1C(Cc2ccc(OCCc3ncc(cc3)CC)cc2)C(=O)NC1=O	Te	1
pomalidomide	O=C1NC(=O)CCC1N1C(=O)c2c(cccc2N)C1=O	Te	1
valdecoxib	S(=O)(=O)(N)c1ccc(cc1)-c1c(noc1C)-c1ccccc1	Te	1
captopril	SCC(C(=O)N1CCCC1C(O)=O)C	Te	1
ezogabine	Fc1ccc(cc1)CNc1cc(N)c(NC(OCC)=O)cc1	Te	1
milnacipran	O=C(N(CC)CC)C1(CC1CN)c1ccccc1	Te	1
ramelteon	O1CCc2c3c(CC[C@H]3CCNC(=O)CC)ccc12	Te	1
aprindine	N(CCCN(CC)CC)(C1Cc2c(C1)cccc2)c1ccccc1	Te	1
delavirdine	S(=O)(=O)(Nc1cc2cc([nH]c2cc1)C(=O)N1CCN(CC1)c1ncccc1NC(C)C)C	Te	1
enzalutamide	S=C1N(C(C)(C)C(=O)N1c1cc(C(F)(F)F)c(cc1)C#N)c1cc(F)c(cc1)C(=O)NC	Te	1
isoprenaline hydrochloride	Oc1cc(ccc1O)C(O)CNC(C)C	Te	1
norfenfluramine	FC(F)(F)c1cc(ccc1)CC(N)C	Te	1
procainamide	O=C(NCCN(CC)CC)c1ccc(N)cc1	Te	1
quinine	O(C)c1cc2c(nccc2[C@@H](O)[C@H]2N3C[C@@H]([C@H](C2)CC3)C=C)cc1	Te	1
rufinamide	Fc1cccc(F)c1Cn1nnc(c1)C(=O)N	Te	1
vildagliptin	OC12CC3(NCC(=O)N4CCC[C@H]4C#N)CC(C1)CC(C3)C2	Te	1
viomycin	O=C/1N[C@@H]([C@@H]2NC(N[C@@H](O)C2)=N)C(=O)NC[C@H](NC(=O)C[C@@H](N)CCCN)C(=O)N[C@@H](CO)C(=O)N[C@@H](CO)C(=O)N\C\1=C/NC(=O)N	Te	1
levodopa	Oc1cc(ccc1O)C[C@H](N)C(O)=O	Te	1
sertraline hydrochloride	Clc1cc(ccc1Cl)[C@@H]1CC[C@H](NC)c2c1cccc2	Te	1
paricalcitol	O[C@@H]1C\C(\C[C@@H](O)C1)=C\C=C/1\[C@@H]2CC[C@H]([C@@H](\C=C\[C@@H](C(O)(C)C)C)C)[C@]2(CCC\1)C	Te	1
aripiprazole	Clc1c(N2CCN(CC2)CCCCOc2cc3NC(=O)CCc3cc2)cccc1Cl	Te	1
azathioprine	S(c1n(cnc1[N+](=O)[O-])C)c1[nH]cnc-2ncnc1-2	Te	1
emodin	Oc1c2c(cc(c1)C)C(=O)c1c(C2=O)c(O)cc(O)c1	Te	1
hydromorphone hydrochloride	O1[C@@H]2[C@]34[C@H]([C@H](N(CC3)C)Cc3c4c1c(O)cc3)CCC2=O	Te	1
monoxidine	Clc1nc(nc(OC)c1NC=1NCCN=1)C	Te	1
dexfenfluramine hydrochloride	FC(F)(F)c1cc(ccc1)CC(NCC)C	Te	1
chloroxine	Clc1cc(Cl)c2c(nccc2)c1O	Te	1
enoxacin	Fc1cc2c(nc1N1CCNCC1)N(C=C(C(O)=O)C2=O)CC	Te	1
febuxostat	s1c(nc(C)c1C(O)=O)-c1cc(C#N)c(OCC(C)C)cc1	Te	1
glyceryl1nitrate	O([N+](=O)[O-])CC(O)CO	Te	1
acenocoumarol	O1c2c(cccc2)C(O)=C(C(CC(=O)C)c2ccc([N+](=O)[O-])cc2)C1=O	Te	1
acetylcysteine	SCC(NC(=O)C)C(O)=O	Te	1
bupivacaine	O=C(Nc1c(cccc1C)C)C1NCCCC1CCCC	Te	1
carbazepine10_11epoxide	O1C2C1c1c(N(c3c2cccc3)C(=O)N)cccc1	Te	1
carbenoxolone sodium	O(C(=O)CCC(O)=O)C1CCC2(C3C(CCC2C1(C)C)(C)C1(C(C2CC(CCC2(CC1)C)(C(O)=O)C)=CC3=O)C)C	Te	1
cefalexin	S1C2N(C(=O)C2NC(=O)C(N)c2ccccc2)C(C(O)=O)=C(C1)C	Te	1
clemastine funurate	Clc1ccc(cc1)[C@@](OCC[C@@H]1N(CCC1)C)(C)c1ccccc1	Te	1
diethylcarbamazine	O=C(N(CC)CC)N1CCN(CC1)C	Te	1
digitoxin	O1C(C)C(OC2OC(C)C(O)C(O)C2)C(O)CC1OC1C(OC(OC2CC3CCC4C(CCC5(C)C(CCC45O)C4=CC(OC4)=O)C3(CC2)C)CC1O)C	Te	1
diphenhydramine hydrochloride	O(C(c1ccccc1)c1ccccc1)CCN(C)C	Te	1
diphenoxylate	O(C(=O)C1(CCN(CC1)CCC(C#N)(c1ccccc1)c1ccccc1)c1ccccc1)CC	Te	1
doxifluridine	FC1=CN([C@@H]2O[C@H](C)[C@@H](O)[C@H]2O)C(=O)NC1=O	Te	1
ertapenem	S([C@H]1C[C@H](NC1)C(=O)Nc1cc(ccc1)C(O)=O)C=1[C@@H]([C@H]2N(C=1C(O)=O)C(=O)[C@@H]2[C@H](O)C)C	Te	1
etacrynic-acid	Clc1c(Cl)c(OCC(O)=O)ccc1C(=O)C(CC)=C	Te	1
floxuridine	FC1=CN([C@@H]2O[C@H](CO)[C@@H](O)C2)C(=O)NC1=O	Te	1
fluocortolone	F[C@@H]1C2=CC(=O)C=C[C@@]2([C@@H]2[C@H]([C@@H]3C[C@@H](C)[C@H](C(=O)CO)[C@]3(C[C@@H]2O)C)C1)C	Te	1
ginkgolide_a	O1C2CC34C56C(OC(=O)C5O)OC3(C2(O)C(C)C1=O)C(OC4CC6C(C)(C)C)=O	Te	1
ginkgolide_b	O1C2C(O)(C34OC5OC(=O)C(O)C56C3(C(OC4=O)CC6C(C)(C)C)C2O)C(C)C1=O	Te	1
indapamide	Clc1ccc(cc1S(=O)(=O)N)C(=O)NN1c2c(CC1C)cccc2	Te	1
lofexidine	Clc1cccc(Cl)c1OC(C)C=1NCCN=1	Te	1
meprobamate	O(CC(CCC)(COC(=O)N)C)C(=O)N	Te	1
nitisinone	FC(F)(F)c1cc([N+](=O)[O-])c(cc1)C(=O)C1C(=O)CCCC1=O	Te	1
pregabalin	OC(=O)C[C@H](CC(C)C)CN	Te	1
sufentanil	s1cccc1CCN1CCC(N(C(=O)CC)c2ccccc2)(CC1)COC	Te	1
terazocin	N1(CC=CC=CC=C1)C=1N(N2CC=CC=CC=C2)CC=CC=CC=1	Te	1
toliprolol	O(CC(O)CNC(C)C)c1cc(ccc1)C	Te	1
chloropromazine	Clc1cc2N(c3c(Sc2cc1)cccc3)CCCN(C)C	Te	1
clorazepate	Clc1cc2c(NC(=O)C(N=C2c2ccccc2)C(O)=O)cc1	Te	1
niacin	OC(=O)c1cccnc1	Te	1
phenylethylmalonamide	O=C(N)C(CC)(C(=O)N)c1ccccc1	Te	1
amoxicillin	S1C2N(C(C(O)=O)C1(C)C)C(=O)C2NC(=O)C(N)c1ccc(O)cc1	Te	1
boceprevir	O=C(NC(CC1CCC1)C(=O)C(=O)N)[C@H]1N(C[C@H]2[C@@H]1C2(C)C)C(=O)[C@@H](NC(=O)NC(C)(C)C)C(C)(C)C	Te	1
lorcaserin_hydrochloride	Cl.Clc1cc2c(CCNC[C@@H]2C)cc1	Te	1
suprofen	s1cccc1C(=O)c1ccc(cc1)C(C(O)=O)C	Te	1
varenicline tartrate	n1c2c(ncc1)cc1[C@@H]3C[C@H](c1c2)CNC3	Te	1
naftidrofuryl oxalate	O1CCCC1CC(Cc1c2c(ccc1)cccc2)C(OCCN(CC)CC)=O	Te	1
chrysophanol	Oc1c2c(cc(c1)C)C(=O)c1c(C2=O)c(O)ccc1	Te	1
physcion	O(C)c1cc(O)c2c(c1)C(=O)c1c(C2=O)c(O)cc(c1)C	Te	1
chlorpropamide	Clc1ccc(S(=O)(=O)NC(=O)NCCC)cc1	Te	1
emtricitabine	S1C[C@H](O[C@H]1CO)N1C=C(F)C(=NC1=O)N	Te	1
epristeride	OC(=O)C=1CCC2(C3C(C4CCC(C(=O)NC(C)(C)C)C4(CC3)C)CC=C2C=1)C	Te	1
estazolam	Clc1cc2c(-n3c(nnc3)CN=C2c2ccccc2)cc1	Te	1
mazindol	Clc1ccc(cc1)C1(O)N2C(=NCC2)c2c1cccc2	Te	1
pipemidic_acid	O=C1c2c(nc(nc2)N2CCNCC2)N(C=C1C(O)=O)CC	Te	1
rofecoxib	S(=O)(=O)(C)c1ccc(cc1)C=1COC(=O)C=1c1ccccc1	Te	1
pirazolac	Clc1ccc(cc1)-c1cn(nc1CC(O)=O)-c1ccc(F)cc1	Te	1
ciclopirox	O=C1N(O)C(=CC(=C1)C)C1CCCCC1	Te	1
amfebutamone hydrochloride	Clc1cc(ccc1)C(=O)C(NC(C)(C)C)C	Te	1
amlodipine	Clc1ccccc1C1C(C(OCC)=O)=C(NC(C)=C1C(OC)=O)COCCN	Te	1
cefprozil	S1[C@H]2N(C(C(O)=O)=C(C1)\C=C\C)C(=O)[C@H]2NC(=O)[C@H](N)c1ccc(O)cc1	Te	1
cinolazepam	Clc1cc2c(N(CCC#N)C(=O)C(O)N=C2c2ccccc2F)cc1	Te	1
cloral betaine	O=C([O-])C[N+](C)(C)C	Te	0
cortisone-acetate	OC1(CCC2C3C(C4(C(=CC(=O)CC4)CC3)C)C(=O)CC12C)C(=O)COC(=O)C	Te	1
dextropropoxyphene hydrochloride	O(C(Cc1ccccc1)(C(CN(C)C)C)c1ccccc1)C(=O)CC	Te	1
diprophylline	O=C1N(C)C(=O)N(c2ncn(c12)CC(O)CO)C	Te	1
dosulepin hydrochloride	S1Cc2c(cccc2)C(c2c1cccc2)=CCCN(C)C	Te	1
encainide	O(C)c1ccc(cc1)C(=O)Nc1ccccc1CCC1N(CCCC1)C	Te	1
gitoxin	O1CC(=CC1=O)[C@@H]1[C@]2(CC[C@H]3[C@@H](CC[C@@H]4C[C@@H](O[C@@H]5O[C@H](C)[C@@H](O[C@@H]6O[C@H](C)[C@@H](O[C@@H]7O[C@H](C)[C@@H](O)[C@@H](O)C7)[C@@H](O)C6)[C@@H](O)C5)CC[C@]34C)[C@@]2(O)C[C@@H]1O)C	Te	1
glibenclamide	Clc1cc(C(=O)NCCc2ccc(S(=O)(=O)NC(=O)NC3CCCCC3)cc2)c(OC)cc1	Te	1
idazoxan	O1c2c(OCC1C=1NCCN=1)cccc2	Te	1
liothyronine	Ic1cc(cc(I)c1Oc1cc(I)c(O)cc1)CC(N)C(O)=O	Te	1
methylergometrine maleate	OCC(NC(=O)C1C=C2C(N(C1)C)Cc1c3c2cccc3n(c1)C)C	Te	1
phencyclidine	N1(CCCCC1)C1(CCCCC1)c1ccccc1	Te	1
pirmenol	OC(CCCN1C(CCCC1C)C)(c1ccccc1)c1ncccc1	Te	1
ruxolitinib	[nH]1c2ncnc(c2cc1)-c1cn(nc1)[C@H](CC#N)C1CCCC1	Te	1
zuclopenthixol	Clc1cc\2c(Sc3c(cccc3)/C/2=C/CCN2CCN(CC2)CCO)cc1	Te	1
ethosuximide	O=C1NC(=O)CC1(CC)C	Te	1
posaconazole	Fc1cc(F)ccc1C1(OCC(C1)COc1ccc(N2CCN(CC2)c2ccc(N3C=NN(C(C(O)C)CC)C3=O)cc2)cc1)Cn1ncnc1	Te	1
torasemide	S(=O)(=O)(NC(=O)NC(C)C)c1cnccc1Nc1cc(ccc1)C	Te	1
voriconazole	Fc1cc(F)ccc1[C@](O)([C@@H](C)c1ncncc1F)Cn1ncnc1	Te	1
mycophenolate_mofetil	O1Cc2c(c(O)c(C\C=C(\CCC(OCCN3CCOCC3)=O)/C)c(OC)c2C)C1=O	Te	1
benzene	c1ccccc1	Te	1
celecoxib	S(=O)(=O)(N)c1ccc(-n2nc(cc2-c2ccc(cc2)C)C(F)(F)F)cc1	Te	1
oxandrolone	O1C[C@]2([C@H](CC1=O)CC[C@H]1[C@@H]3CC[C@@](O)(C)[C@]3(CC[C@@H]12)C)C	Te	1
palonosetron	O=C1N(C[C@H]2CCCc3c2c1ccc3)[C@H]1C2CCN(C1)CC2	Te	1
sulfadiazine	S(=O)(=O)(Nc1ncccn1)c1ccc(N)cc1	Te	1
treosulfan	S(OCC(O)C(O)COS(=O)(=O)C)(=O)(=O)C	Te	1
verapamil	O(C)c1cc(ccc1OC)C(C(C)C)(CCCN(CCc1cc(OC)c(OC)cc1)C)C#N	Te	1
warfarin	O1c2c(cccc2)C(O)=C(C(CC(=O)C)c2ccccc2)C1=O	Te	1
vilazodone	Cl.o1c2c(cc1C(=O)N)cc(N1CCN(CC1)CCCCc1c3cc(ccc3[nH]c1)C#N)cc2	Te	1
carfecillin	S1[C@H]2N([C@@H](C(O)=O)C1(C)C)C(=O)[C@H]2NC(=O)C(C(Oc1ccccc1)=O)c1ccccc1	Te	1
propanolol	O(C[C@H](O)CNC(C)C)c1c2c(ccc1)cccc2	Te	1
tapentadol	Oc1cc(ccc1)[C@@H]([C@H](CN(C)C)C)CC	Te	1
adinazolam	Clc1cc2c(-n3c(nnc3CN(C)C)CN=C2c2ccccc2)cc1	Te	1
alfentanil	O=C1N(N=NN1CC)CCN1CCC(N(C(=O)CC)c2ccccc2)(CC1)COC	Te	1
alizapride	O(C)c1cc2[nH]nnc2cc1C(=O)NCC1N(CCC1)CC=C	Te	1
alogliptin	O=C1N(C)C(=O)N(Cc2ccccc2C#N)C(N2C[C@H](N)CCC2)=C1	Te	1
amifostine	S(P(O)(O)=O)CCNCCCN	Te	1
amiodarone	Ic1cc(cc(I)c1OCCN(CC)CC)C(=O)c1c2c(oc1CCCC)cccc2	Te	1
antrafenine	FC(F)(F)c1cc(N2CCN(CC2)CCOC(=O)c2ccccc2Nc2c3c(ncc2)cc(cc3)C(F)(F)F)ccc1	Te	1
atomoxetine	O([C@H](CCNC)c1ccccc1)c1ccccc1C	Te	1
beta-d-fructose	OC(C(O)C(=O)CO)C(O)CO	Te	1
betazole	[nH]1nccc1CCN	Te	1
bromfenac	Brc1ccc(cc1)C(=O)c1cccc(CC(O)=O)c1N	Te	1
buflomedil	O(C)c1cc(OC)cc(OC)c1C(=O)CCCN1CCCC1	Te	1
bufuralol	o1c2c(cc1C(O)CNC(C)(C)C)cccc2CC	Te	1
busulfan	S(OCCCCOS(=O)(=O)C)(=O)(=O)C	Te	1
calcitriol	OC1CC(O)CC(=CC=C2C3CCC(C(CCCC(O)(C)C)C)C3(CCC2)C)C1=C	Te	1
carprofen	Clc1cc2c3c([nH]c2cc1)cc(cc3)C(C(O)=O)C	Te	1
cefadroxil	S1C2N(C(=O)C2NC(=O)C(N)c2ccc(O)cc2)C(C(O)=O)=C(C1)C	Te	1
cefazolin	s1c(nnc1SCC=1CS[C@H]2N(C=1C(O)=O)C(=O)[C@H]2NC(=O)Cn1nnnc1)C	Te	1
cephalexin	S1[C@H]2N(C(C(O)=O)=C(C1)C)C(=O)[C@H]2NC(=O)[C@H](N)c1ccccc1	Te	1
cetirizine hydrochloride	Clc1ccc(cc1)C(N1CCN(CC1)CCOCC(O)=O)c1ccccc1	Te	1
chenodeoxycholic_acid	O[C@@H]1CC[C@]2([C@@H](C1)C[C@@H](O)[C@H]1[C@@H]3CC[C@H]([C@@H](CCC(O)=O)C)[C@]3(CC[C@@H]12)C)C	Te	1
chlormezanone	Clc1ccc(cc1)C1S(=O)(=O)CCC(=O)N1C	Te	1
chloroform	ClC(Cl)Cl	Te	1
cibenzoline	N1CCN=C1C1CC1(c1ccccc1)c1ccccc1	Te	1
cicloprolol	O(CC(O)CNC(C)C)c1ccc(OCCOCC2CC2)cc1	Te	1
clarithromycin	O1C(CC)C(O)(C)C(O)C(C)C(=O)C(CC(OC)(C)C(OC2OC(CC(N(C)C)C2O)C)C(C)C(OC2OC(C)C(O)C(OC)(C2)C)C(C)C1=O)C	Te	1
clinafloxacin	Clc1c2N(C=C(C(O)=O)C(=O)c2cc(F)c1N1CC(N)CC1)C1CC1	Te	1
clopamide	Clc1ccc(cc1S(=O)(=O)N)C(=O)NN1C(CCCC1C)C	Te	1
colchicine	O(C)C1=CC=C2C(=CC1=O)C(NC(=O)C)CCc1c2c(OC)c(OC)c(OC)c1	Te	1
conivaptan	O=C(N1CCc2[nH]c(nc2-c2c1cccc2)C)c1ccc(NC(=O)c2ccccc2-c2ccccc2)cc1	Te	1
cyclobenzaprine	N(CCC=C1c2c(C=Cc3c1cccc3)cccc2)(C)C	Te	1
dalfampridine	n1ccc(N)cc1	Te	1
doxapram	O1CCN(CC1)CCC1CN(CC)C(=O)C1(c1ccccc1)c1ccccc1	Te	1
doxycycline	OC1=C2[C@@H]([C@H](c3c1c(O)ccc3)C)[C@H](O)[C@@H]1[C@@](O)(C(=O)\C(=C(/O)\N)\C(=O)[C@H]1N(C)C)C2=O	Te	1
drotaverine	O(CC)c1cc(ccc1OCC)\C=C\1/NCCc2cc(OCC)c(OCC)cc/12	Te	1
entecavir	O=C1NC(=Nc2n(cnc12)[C@H]1C[C@H](O)[C@@H](CO)C1=C)N	Te	1
ephedrine	OC(C(NC)C)c1ccccc1	Te	1
ethanol	OCC	Te	1
ethynylestradiol	Oc1cc2CC[C@H]3[C@@H]4CC[C@@](O)(C#C)[C@]4(CC[C@@H]3c2cc1)C	Te	1
etilefrine	Oc1cc(ccc1)C(O)CNCC	Te	1
fenspiride	O1C2(CCN(CC2)CCc2ccccc2)CNC1=O	Te	1
fleroxacin	Fc1c2N(CC(C(O)=O)C(=O)c2cc(F)c1N1CCN(CC1)C)CCF	Te	1
flupirtine	Fc1ccc(cc1)CNc1nc(N)c(NC(OCC)=O)cc1	Te	1
fomepizole	[nH]1ncc(c1)C	Te	1
glucose	O1C(CO)C(O)C(O)C(O)C1O	Te	1
hydroxyurea	O=C(NO)N	Te	1
ifosfamide	ClCCN1P(OCCC1)(=O)NCCCl	Te	1
indecainide	O=C(N)C1(c2c(-c3c1cccc3)cccc2)CCCNC(C)C	Te	1
lacosamide	O(C[C@@H](NC(=O)C)C(=O)NCc1ccccc1)C	Te	1
levoprotiline	O[C@H](CC12CCC(c3c1cccc3)c1c2cccc1)CNC	Te	1
lomustine	ClCCN(N=O)C(=O)NC1CCCCC1	Te	1
loracarbef	ClC=1CCC2N(C(=O)C2NC(=O)C(N)c2ccccc2)C=1C(O)=O	Te	1
loxiglumide	Clc1cc(ccc1Cl)C(=O)NC(CCC(O)=O)C(=O)N(CCCCC)CCCOC	Te	1
lymecycline	OC=1[C@@H](N(C)C)[C@@H]2C[C@H]3C(=C(O)[C@]2(O)C(=O)C=1C(=O)NCNCCCC[C@H](N)C(O)=O)C(=O)c1c(cccc1O)[C@]3(O)C	Te	1
miglitol	O[C@H]1[C@H](O)[C@@H](O)CN(CCO)[C@@H]1CO	Te	1
miglustat	O[C@H]1[C@H](O)[C@@H](O)CN(CCCC)[C@@H]1CO	Te	1
minocycline	OC=1[C@@H](N(C)C)[C@@H]2C[C@H]3C(=C(O)[C@]2(O)C(=O)C=1C(=O)N)C(=O)c1c(C3)c(N(C)C)ccc1O	Te	1
molsidomine	O1[N-][N+](N2CCOCC2)=CC1=NC(OCC)=O	Te	1
nevirapine	O=C1Nc2c(nccc2C)N(c2ncccc12)C1CC1	Te	1
nimodipine	O(C(=O)C=1C(C(C(OCCOC)=O)=C(NC=1C)C)c1cc([N+](=O)[O-])ccc1)C(C)C	Te	1
n-methyl-2-pyridineethanamine	n1ccccc1CCNC	Te	1
nomifensine	Nc1c2c(ccc1)C(CN(C2)C)c1ccccc1	Te	1
noscapine	O1[C@@H](c2c(c(OC)c(OC)cc2)C1=O)[C@@H]1N(CCc2c1c(OC)c1OCOc1c2)C	Te	1
oxtriphylline	O=C1N(C)C([O-])=C2N=CN=C2N1C	Te	1
phe-l-pro	OC(=O)[C@H]1N(CCC1)C(=O)[C@H](N)Cc1ccccc1	Te	1
phenacemide	O=C(NC(=O)N)Cc1ccccc1	Te	1
phensuximide	O=C1N(C)C(=O)CC1c1ccccc1	Te	1
pyrimethamine	Clc1ccc(cc1)-c1c(nc(nc1N)N)CC	Te	1
reboxetine	O1CCNC[C@@H]1[C@H](Oc1ccccc1OCC)c1ccccc1	Te	1
roquinimex	OC=1c2c(N(C)C(=O)C=1C(=O)N(C)c1ccccc1)cccc2	Te	1
rosiglitazone	S1C(Cc2ccc(OCCN(C)c3ncccc3)cc2)C(=O)NC1=O	Te	1
salicylic acid	Oc1ccccc1C(O)=O	Te	1
sodium valproate	OC(=O)C(CCC)CCC	Te	1
solifenacin	O(C(=O)N1CCc2c(cccc2)[C@@H]1c1ccccc1)[C@@H]1C2CCN(C1)CC2	Te	1
temozolomide	O=C1n2c(N=NN1C)c(nc2)C(=O)N	Te	1
terodiline	N(C(C)(C)C)C(CC(c1ccccc1)c1ccccc1)C	Te	1
theophyline	O=C1N(C)C(=O)N(c2nc[nH]c12)C	Te	1
tizanidine	Clc1ccc2nsnc2c1NC=1NCCN=1	Te	1
toluene	c1ccccc1C	Te	1
ursodeoxycholic_acid	O[C@@H]1CC[C@]2([C@@H](C1)C[C@H](O)[C@H]1[C@@H]3CC[C@H](C(CCC(O)=O)C)[C@]3(CC[C@@H]12)C)C	Te	1
zidovudine	O1[C@H](CO)[C@@H](N=[N+]=[N-])C[C@@H]1N1C=C(C)C(=O)NC1=O	Te	1
ezetimibe	Fc1ccc(cc1)[C@@H](O)CC[C@@H]1[C@H](N(C1=O)c1ccc(F)cc1)c1ccc(O)cc1	Te	1
carglumic _acid	OC(=O)CC[C@H](NC(=O)N)C(O)=O	Te	1
ticagrelor	S(CCC)c1nc(N[C@@H]2C[C@H]2c2cc(F)c(F)cc2)c2nnn(c2n1)[C@@H]1C[C@H](OCCO)[C@@H](O)[C@H]1O	Te	1
altretamine	n1c(nc(nc1N(C)C)N(C)C)N(C)C	Te	1

## Sheet: 776+194
Name	Drug	SMI	Class	label
Arbekacin	1	O1[C@H](CO)[C@@H](O)[C@H](N)[C@@H](O)[C@H]1O[C@@H]1[C@@H](O)[C@H](O[C@H]2O[C@@H](CC[C@H]2N)CN)[C@@H](N)C[C@H]1NC(=O)[C@@H](O)CCN	Tr	0
Azlocillin	1	S1[C@H]2N([C@@H](C(O)=O)C1(C)C)C(=O)[C@H]2NC(=O)[C@H](NC(=O)N1CCNC1=O)c1ccccc1	Tr	0
Gentamicin_C1a	1	O1[C@H](O[C@H]2[C@H](O)[C@@H](O[C@H]3OC[C@@](O)(C)[C@H](NC)[C@H]3O)[C@H](N)C[C@@H]2N)[C@H](N)CC[C@H]1CC	Tr	0
Lucifer_Yellow_CH	0	S(O)(=O)(=O)c1cc2c3c(cc(S(O)(=O)=O)cc3c1N)C(=O)N(NNC(=O)NN)C2=O	Tr	0
Meropenem	1	S([C@@H]1N[C@@H](CC1)C(=O)N(C)C)C=1[C@@H]([C@H]2N(C=1C(O)=O)C(=O)[C@@H]2[C@@H](O)C)C	Tr	0
Mezlocillin	1	S1[C@@H]2N([C@@H](C(O)=O)C1(C)C)C(=O)[C@@H]2NC(=O)[C@@H](NC(=O)N1CCN(S(=O)(=O)C)C1=O)c1ccccc1	Tr	0
Netilmicin	1	O1[C@@H](O[C@H]2[C@H](O)[C@@H](O[C@H]3OC[C@@](O)(C)[C@H](NC)[C@H]3O)[C@H](NCC)C[C@@H]2N)[C@@H](N)CC=C1CN	Tr	0
Pentamidine	1	O(CCCCCOc1ccc(cc1)C(N)=N)c1ccc(cc1)C(N)=N	Tr	0
Raffinose	0	O1[C@](O[C@H]2O[C@H](CO[C@H]3O[C@H](CO)[C@H](O)[C@H](O)[C@H]3O)[C@@H](O)[C@H](O)[C@H]2O)(CO)[C@@H](O)[C@H](O)[C@H]1CO	Tr	0
Streptozocin	1	O1[C@H](CO)[C@@H](O)[C@H](O)[C@@H](NC(=O)N(N=O)C)[C@H]1O	Tr	0
Vancomycin	1	Clc1c2Oc3cc4[C@H](NC(=O)[C@@H](NC(=O)[C@@H](NC(=O)[C@H](NC)CC(C)C)[C@H](O)c(c1)cc2)CC(=O)N)C(=O)N[C@@H]1c2cc(-c5c(cc(O)cc5O)[C@H](NC(=O)[C@@H](NC1=O)[C@@H](O)c1cc(Cl)c(Oc(c4)c3O[C@@H]3O[C@H](CO)[C@H](O)[C@@H](O)[C@H]3O[C@H]3O[C@@H](C)[C@H](O)[C@@](N)(C3)C)cc1)C(O)=O)c(O)cc2	Tr	0
alcuronium chloride	1	OCC=C1C2C=3C4N(C=C5C6CC7[N+](CC6=CCO)(CCC67C5N(C=3)c3c6cccc3)CC=C)c3c(C45C([N+](C1)(CC5)CC=C)C2)cccc3	Tr	0
atracurium	1	O(C)c1cc(ccc1OC)CC1[N+](CCc2c1cc(OC)c(OC)c2)(CCC(OCCCCCOC(=O)CC[N+]1(CCc2c(cc(OC)c(OC)c2)C1Cc1cc(OC)c(OC)cc1)C)=O)C	Tr	0
cefpirome	1	s1cc(nc1N)/C(=N/OC)/C(=O)NC1C2SCC(C[n+]3ccccc3)=C(N2C1=O)C(O)=O	Tr	0
ceftazidime	1	s1cc(nc1N)/C(=N/OC(C(O)=O)(C)C)/C(=O)NC1C2SCC(C[n+]3ccccc3)=C(N2C1=O)C(O)=O	Tr	0
mivacurium	1	O(C)c1c(OC)cc(cc1OC)CC1[N+](CCc2c1cc(OC)c(OC)c2)(CCCOC(=O)CC\C=C\CCC(OCCC[N+]1(CCc2c(cc(OC)c(OC)c2)C1Cc1cc(OC)c(OC)c(OC)c1)C)=O)C	Tr	0
tubocurarine	1	O1c2cc3C([N+](CCc3cc2OC)(C)C)Cc2ccc(Oc3c4C([N+](CCc4cc(OC)c3O)(C)C)Cc3cc1c(O)cc3)cc2	Tr	0
cefamandole_nafate	1	S1[C@H]2N(C(C(=O)[O-])=C(C1)CSc1nnnn1C)C(=O)[C@H]2NC(=O)[C@H](OC=O)c1ccccc1	Tr	0
ceforanide	1	S1[C@H]2N(C(C(O)=O)=C(C1)CSc1nnnn1CC(O)=O)C(=O)[C@H]2NC(=O)Cc1ccccc1CN	Tr	0
cephalothin	1	s1cccc1CC(=O)N[C@H]1[C@H]2SCC(COC(=O)C)=C(N2C1=O)C(O)=O	Tr	0
colestipol	1	[NH2+](CC[NH2+]CC[NH3+])CC[NH2+]CC[NH3+]	Tr	0
dapiprazole	1	n12CCCCc1nnc2CCN1CCN(CC1)c1ccccc1C	Tr	0
daunorubicin hydrochloride	1	O1C(C)C(O)C(N)CC1OC1CC(O)(Cc2c1c(O)c1c(C(=O)c3c(C1=O)c(OC)ccc3)c2O)C(=O)C	Tr	0
dopamine hydrochloride	1	Oc1cc(ccc1O)CCN	Tr	0
epirubicin hydrochloride	1	O1C(C)C(O)C(N)CC1OC1CC(O)(Cc2c1c(O)c1c(C(=O)c3c(C1=O)c(OC)ccc3)c2O)C(=O)CO	Tr	0
idoxuridine	1	IC1=CN(C2OC(CO)C(O)C2)C(=O)NC1=O	Tr	0
iotroxate	0	Ic1c(NC(=O)COCCOCCOCC(=O)Nc2c(C(O)=O)c(I)cc(I)c2I)c(C(O)=O)c(I)cc1I	Tr	0
leuprolide	1	Oc1ccc(cc1)CC(NC(=O)C(NC(=O)C(NC(=O)C(NC(=O)C1NC(=O)CC1)Cc1[nH]cnc1)Cc1c2c([nH]c1)cccc2)CO)C(=O)NC(C(C)C)C(=O)NC(C(C)C)C(=O)NC(CCCN=C(N)N)C(=O)N1CCCC1C(=O)NCC	Tr	0
nafarelin	1	Oc1ccc(cc1)CC(NC(=O)C(NC(=O)C(NC(=O)C(NC(=O)C1NC(=O)CC1)Cc1[nH]cnc1)Cc1c2c([nH]c1)cccc2)CO)C(=O)NC(Cc1cc2c(cc1)cccc2)C(=O)NC(CC(C)C)C(=O)NC(CCCNC(N)=N)C(=O)N1CCCC1C(=O)NCC(=O)N	Tr	0
octreoide	0	S1SCC(NC(=O)C(NC(=O)C(NC(=O)C(NC(=O)C(NC(=O)C(NC(=O)C(N)Cc2ccccc2)C1)Cc1ccccc1)Cc1c2c([nH]c1)cccc2)CCCCN)C(O)C)C(=O)NC(C(O)C)CO	Tr	0
piperacillin	1	S1[C@H]2N([C@@H](C(O)=O)C1(C)C)C(=O)[C@H]2NC(=O)[C@H](NC(=O)N1CCN(CC)C(=O)C1=O)c1ccccc1	Tr	0
suramin sodium	1	S(O)(=O)(=O)c1c2c(cc(S(O)(=O)=O)c1)c(S(O)(=O)=O)ccc2NC(=O)c1cc(NC(=O)c2cc(NC(=O)Nc3cc(ccc3)C(=O)Nc3cc(ccc3C)C(=O)Nc3c4c(cc(S(O)(=O)=O)cc4S(O)(=O)=O)c(S(O)(=O)=O)cc3)ccc2)c(cc1)C	Tr	0
terlipressin	1	S1SCC(NC(=O)C(NC(=O)C(NC(=O)C(NC(=O)C(NC(=O)C(NC(=O)CNC(=O)CNC(=O)CN)C1)Cc1ccc(O)cc1)Cc1ccccc1)CCC(=O)N)CC(=O)N)C(=O)N1CCCC1C(=O)NC(CCCCN)C(=O)NCC(=O)N	Tr	0
vidarabine	1	O1[C@H](CO)[C@@H](O)[C@H](O)[C@@H]1n1c2ncnc(N)c2nc1	Tr	0
Alendronic_acid	1	P(O)(O)(=O)C(P(O)(O)=O)(O)CCCN	Tr	0
Aztreonam	1	s1cc(nc1N)/C(=N\OC(C(O)=O)(C)C)/C(=O)N[C@H]1[C@@H](N(S(O)(=O)=O)C1=O)C	Tr	0
Ceftriaxone	1	s1cc(nc1N)/C(=N/OC)/C(=O)N[C@H]1[C@H]2SCC(CSC3=NC(=O)C(=O)NN3C)=C(N2C1=O)C(O)=O	Tr	0
Kanamycin	1	O1[C@@H](CN)[C@H](O)[C@H](O)[C@H](O)[C@H]1O[C@H]1[C@H](O)[C@@H](O[C@H]2O[C@@H](CO)[C@@H](O)[C@H](N)[C@H]2O)[C@H](N)C[C@@H]1N	Tr	0
Risedronic_acid	1	P(O)(O)(=O)C(P(O)(O)=O)(O)Cc1cccnc1	Tr	0
Streptomycin	1	O1[C@@H](CO)[C@H](O)[C@H](O)[C@H](NC)[C@@H]1O[C@H]1[C@@](O)(C=O)[C@@H](O[C@@H]1O[C@@H]1[C@@H](NC(N)=N)[C@H](O)[C@@H](NC(N)=N)[C@H](O)[C@H]1O)C	Tr	0
cromoglicate sodium	1	O1c2c(C(=O)C=C1C(O)=O)c(OCC(O)COc1c3c(OC(=CC3=O)C(O)=O)ccc1)ccc2	Tr	0
sucralfate	1	S(OC1C(OS(=O)(=O)[O-])C(OC(OC2(OC(OS(=O)(=O)[O-])C(OS(=O)(=O)[O-])C2OS(=O)(=O)[O-])COS(=O)(=O)[O-])C1OS(=O)(=O)[O-])COS(=O)(=O)[O-])(=O)(=O)[O-]	Tr	0
ouabain	1	O1C(C)C(O)C(O)C(O)C1OC1CC2(O)CCC3C(C2(CO)C(O)C1)C(O)CC1(C)C(CCC13O)C1=CC(OC1)=O	Tr	0
neostigmine bromide	1	O(C(=O)N(C)C)c1cc([N+](C)(C)C)ccc1	Tr	0
Acarbose	1	O1[C@H](C)[C@@H](N[C@H]2C=C(CO)[C@@H](O)[C@H](O)[C@H]2O)[C@H](O)[C@@H](O)[C@H]1O[C@H]1[C@H](O)[C@@H](O)[C@H](O[C@@H]1CO)O[C@@H]([C@H](O)CO)[C@@H](O)[C@@H](O)C=O	Tr	0
iothalamate sodium	1	Ic1c(C(=O)NC)c(I)c(NC(=O)C)c(I)c1C(O)=O	Tr	0
teicoplanin	1	Clc1c2Oc3cc4C(NC(=O)C5NC(=O)C(NC(=O)C(N)c6cc(Oc7cc(O)cc5c7)c(O)cc6)Cc5cc(Cl)c(Oc(c4)c3O)cc5)C(=O)NC3c4cc(-c5c(cc(O)cc5O)C(NC(=O)C(NC3=O)C(O)c(c1)cc2)C(O)=O)c(O)cc4	Tr	0
olsalazine	1	Oc1ccc(N\N=C\2/C=C(C(O)=O)C(=O)C=C/2)cc1C(O)=O	Tr	0
Amphotericin B	1	O1[C@@H](C)[C@H](C)[C@H](O)[C@H](\C=C/C=C\C=C\C=C\C=C\C=C\C=C\[C@H](O[C@@H]2O[C@H](C)[C@@H](O)[C@H](N)[C@@H]2O)C[C@@H]2O[C@@](O)(C[C@H](O)[C@H]2C(O)=O)C[C@H](O)C[C@H](O)[C@@H](O)CC[C@@H](O)C[C@@H](O)CC1=O)C	Tr	0
Clodronate	1	ClC(Cl)(P(O)(O)=O)P(O)(O)=O	Tr	0
Neomycin	1	O1[C@@H](CN)[C@@H](O)[C@H](O)[C@@H](N)[C@H]1O[C@H]1[C@@H](O)[C@@H](O[C@@H]1CO)O[C@@H]1[C@H](O[C@@H]2O[C@H](CN)[C@@H](O)[C@H](O)[C@H]2N)[C@@H](N)C[C@H](N)[C@@H]1O	Tr	0
cidofovir	1	P(O)(O)(=O)CO[C@@H](CN1C=CC(=NC1=O)N)CO	Tr	0
latamoxef disodium	1	S(CC=1COC2N(C(=O)C2(OC)NC(=O)C(C(O)=O)c2ccc(O)cc2)C=1C(O)=O)c1nnnn1C	Tr	0
Cefotaxime	1	s1cc(nc1N)/C(=N/OC)/C(=O)N[C@H]1[C@H]2SCC(COC(=O)C)=C(N2C1=O)C(O)=O	Tr	0
Chlorhexidine	1	Clc1ccc(NC(NC(NCCCCNC(NC(Nc2ccc(Cl)cc2)=N)=N)=N)=N)cc1	Tr	0
Diatrizoate	1	Ic1c(C(O)=O)c(I)c(NC(=O)C)c(I)c1NC(=O)C	Tr	0
Edetic_acid	1	OC(=O)CN(CCN(CC(O)=O)CC(O)=O)CC(O)=O	Tr	0
Etidronate	1	P(O)(O)(=O)C(P(O)(O)=O)(O)C	Tr	0
Gentamincin_C1	1	O1[C@H](O[C@H]2[C@H](O)[C@@H](O[C@H]3OC[C@@](O)(C)[C@H](NC)[C@H]3O)[C@H](N)C[C@@H]2N)[C@H](N)CC[C@H]1[C@H](NC)C	Tr	0
Imipenem	1	S(CCNC=N)C=1C[C@H]2N(C=1C(O)=O)C(=O)[C@@H]2[C@H](O)C	Tr	0
Iotroxic_acid	1	Ic1c(C(O)=O)c(I)cc(I)c1NC(=O)COCCOCCOCC(=O)Nc1c(I)c(C(O)=O)c(I)cc1I	Tr	0
Mitoxantrone	1	Oc1c2c(C(=O)c3c(C2=O)c(NCCNCCO)ccc3NCCNCCO)c(O)cc1	Tr	0
Pamidronic_acid	1	P(O)(O)(=O)C(P(O)(O)=O)(O)CCN	Tr	0
Phthalylsulfathiazole	0	s1ccnc1NS(=O)(=O)c1ccc(NC(=O)c2ccccc2C(O)=O)cc1	Tr	0
Succinylsulfathiazole	1	s1ccnc1NS(=O)(=O)c1ccc(NC(=O)CCC(O)=O)cc1	Tr	0
Sulbactam	1	S1(=O)(=O)[C@H]2N([C@H](C(O)=O)C1(C)C)C(=O)C2	Tr	0
Ticarcillin	1	S1[C@H]2N([C@@H](C(O)=O)C1(C)C)C(=O)[C@H]2NC(=O)[C@H](C(O)=O)c1ccsc1	Tr	0
cefuroxime	1	S1[C@H]2N(C(C(O)=O)=C(C1)COC(=O)N)C(=O)[C@H]2NC(=O)\C(=N/OC)\c1occc1	Tr	0
ganciclovir sodium	1	Oc1nc(nc2n(cnc12)COC(CO)CO)N	Tr	0
hbed	0	Oc1ccccc1CN(CCN(Cc1ccccc1O)CC(O)=O)CC(O)=O	Tr	0
sennoside	1	O1C(CO)C(O)C(O)C(O)C1Oc1c2c(ccc1)C(c1c(C2=O)c(O)cc(c1)C(O)=O)C1c2c(C(=O)c3c1cccc3O)c(OC1OC(CO)C(O)C(O)C1O)ccc2	Tr	0
Tiludronic_acid	1	Clc1ccc(cc1)CC(P(O)(O)=O)P(O)(O)=O	Tr	0
atovaquone	1	Clc1ccc(cc1)C1CCC(CC1)C=1C(=O)C(=O)c2c(cccc2)C=1O	Tr	0
probucol	1	S(C(Sc1cc(C(C)(C)C)c(O)c(c1)C(C)(C)C)(C)C)c1cc(C(C)(C)C)c(O)c(c1)C(C)(C)C	Tr	0
xamoterol	1	O1CCN(CC1)C(=O)NCCNCC(O)COc1ccc(O)cc1	Tr	0
distigmine	1	O(C(=O)N(CCCCCCN(C(Oc1ccc[n+](c1)C)=O)C)C)c1ccc[n+](c1)C	Tr	0
Cefmetazole	1	S1[C@H]2N(C(C(O)=O)=C(C1)CSc1nnnn1C)C(=O)[C@@]2(OC)NC(=O)CSCC#N	Tr	0
butylscopolamine	1	O1C2C3[N+](C(CC(OC(=O)C(CO)c4ccccc4)C3)C12)(CCCC)C	Tr	0
propantheline	1	O1c2c(cccc2)C(c2c1cccc2)C(OCC[N+](C(C)C)(C(C)C)C)=O	Tr	0
levocarnitine	1	OC(CC(=O)[O-])C[N+](C)(C)C	Tr	0
mecillinam	1	S1C2N(C(C(O)=O)C1(C)C)C(=O)C2N=CN1CCCCCC1	Tr	0
sequestren	0	O=C([O-])CN(CCN(CC(=O)[O-])CC(=O)[O-])CC(=O)[O-]	Tr	0
Acamprosate	1	S(O)(=O)(=O)CCCNC(=O)C	Tr	0
phenoperidine hydrochloride	1	O(C(=O)C1(CCN(CC1)CCC(O)c1ccccc1)c1ccccc1)CC	Tr	0
azosemide	1	Clc1cc(NCc2sccc2)c(cc1S(=O)(=O)N)-c1nn[nH]n1	Tr	0
tacrolimus	1	O1[C@H](/C(=C/[C@H]2C[C@@H](OC)[C@H](O)CC2)/C)[C@H](C)[C@@H](O)CC(=O)[C@@H](\C=C(/C[C@@H](C[C@H](OC)[C@H]2O[C@](O)([C@@H](C[C@@H]2OC)C)C(=O)C(=O)N2[C@@H](CCCC2)C1=O)C)\C)CC=C	Tr	0
oxitropium	1	O1C2C3[N+](C(CC(OC(=O)C(CO)c4ccccc4)C3)C12)(CC)C	Tr	0
adefovir	1	P(O)(O)(=O)COCCn1c2ncnc(N)c2nc1	Tr	0
etravirine	1	Brc1c(nc(nc1Oc1c(cc(cc1C)C#N)C)Nc1ccc(cc1)C#N)N	Tr	0
k-strophanthoside	0	O1C(COC2OC(CO)C(O)C(O)C2O)C(O)C(O)C(O)C1OC1C(OC)CC(OC1O)OC1CC2(O)CCC3C(CCC4(C)C(CCC34O)C3=CC(OC3)=O)C2(CC1)C=O	Tr	0
orlistat	1	O1[C@@H](C[C@@H](OC(=O)[C@@H](NC=O)CC(C)C)CCCCCCCCCCC)[C@H](CCCCCC)C1=O	Tr	0
methylscopolamine	1	O1[C@H]2[C@H]3[N+]([C@@H]([C@@H]12)CC(OC(=O)[C@H](CO)c1ccccc1)C3)(C)C	Tr	0
glycopyrrolate	1	O(C(=O)C(O)(C1CCCC1)c1ccccc1)C1CC[N+](C1)(C)C	Tr	0
foscarnet	1	P(O)(O)(=O)C(O)=O	Tr	0
indinavir sulfate	1	OC1Cc2c(cccc2)C1NC(=O)C(Cc1ccccc1)CC(O)CN1CCN(CC1C(=O)NC(C)(C)C)Cc1cccnc1	Tr	0
Cilazaprilat	1	O=C1N2N(CCC[C@@H]1N[C@@H](CCc1ccccc1)C(O)=O)CCC[C@H]2C(O)=O	Tr	0
aciclovir	1	Oc1nc(nc2n(cnc12)COCCO)N	Tr	0
fluticasone-propionate	1	S(C(=O)C1(OC(=O)CC)C2(CC(O)C3(F)C(C2CC1C)CC(F)C1=CC(=O)C=CC13C)C)CF	Tr	0
pranlukast	1	O1c2c(cccc2NC(=O)c2ccc(OCCCCc3ccccc3)cc2)C(=O)C=C1c1nn[nH]n1	Tr	0
auranofin	1	SC1OC(COC(=O)C)C(OC(=O)C)C(OC(=O)C)C1OC(=O)C	Tr	0
enalaprilat	1	OC(=O)[C@H]1N(CCC1)C(=O)[C@@H](N[C@@H](CCc1ccccc1)C(O)=O)C	Tr	0
ergoloid_mesylate	1	O1C(NC(=O)C2CC3C(N(C2)C)Cc2c4c3cccc4[nH]c2)(C(C)C)C(=O)N2C(C(CC)(C)C)C(=O)N3C(CCC3)C12O	Tr	0
phenoxybenzamine hydrochloride	1	ClCCN(Cc1ccccc1)C(COc1ccccc1)C	Tr	0
pirenzepine hydrochloride	1	O=C1Nc2cccnc2N(c2c1cccc2)C(=O)CN1CCN(CC1)C	Tr	0
Lincomycin	1	S(C)[C@H]1O[C@H]([C@@H](NC(=O)[C@H]2N(C[C@@H](C2)CCC)C)[C@@H](O)C)[C@H](O)[C@H](O)[C@H]1O	Tr	0
cyclosporin	1	O=C1N(C)C(C(O)C(C\C=C\C)C)C(=O)NC(CC)C(=O)N(CC(=O)N(C)C(CC(C)C)C(=O)NC(C(C)C)C(=O)N(C)C(CC(C)C)C(=O)NC(C)C(=O)NC(C)C(=O)N(C)C(CC(C)C)C(=O)N(C)C(CC(C)C)C(=O)N(C)C1C(C)C)C	Tr	0
fluorouracil	1	FC1=CNC(=O)NC1=O	Tr	0
pralidoxime	1	O\N=C\c1[n+](cccc1)C	Tr	0
benzylpenicillin	1	S1[C@H]2N([C@@H](C(O)=O)C1(C)C)C(=O)[C@H]2NC(=O)Cc1ccccc1	Tr	1
penicillin g	1	S1C2N(C(C(O)=O)C1(C)C)C(=O)C2CC(=O)Cc1ccccc1	Tr	1
reserpine	1	O(C)C1C(C2C(CC1OC(=O)c1cc(OC)c(OC)c(OC)c1)CN1C(C2)c2[nH]c3cc(OC)ccc3c2CC1)C(OC)=O	Tr	1
saquinavir mesilate	1	OC(C(NC(=O)C(NC(=O)c1nc2c(cc1)cccc2)CC(=O)N)Cc1ccccc1)CN1CC2C(CC1C(=O)NC(C)(C)C)CCCC2	Tr	1
fosfomycin	1	P(O)(O)(=O)C1O[C@H]1C	Tr	1
lovastatin	1	O1[C@@H](C[C@@H](O)CC1=O)CC[C@@H]1[C@@H]2C(=C[C@@H](C[C@@H]2OC(=O)[C@H](CC)C)C)C=C[C@@H]1C	Tr	1
AAFC	0	FC1=CN2[C@@H]3O[C@H](CO)[C@@H](O)[C@@H]3OC2=NC1=N	Tr	1
Nadolol	1	O(C[C@@H](O)CNC(C)(C)C)c1c2C[C@H](O)[C@H](O)Cc2ccc1	Tr	1
fosinopril sodium	1	P(OC(OC(=O)CC)C(C)C)(=O)(CCCCc1ccccc1)CC(=O)N1CC(CC1C(O)=O)C1CCCCC1	Tr	1
pravastatin	1	O(C(=O)[C@H](CC)C)[C@@H]1[C@H]2C(=C[C@@H](O)C1)C=C[C@H](C)[C@@H]2CC[C@@H](O)C[C@@H](O)CC(O)=O	Tr	1
tioguanine	1	S=C1NC(=Nc2[nH]cnc12)N	Tr	1
Dihydroergotamine	1	O1[C@](NC(=O)[C@@H]2C[C@H]3[C@H](N(C2)C)Cc2c4c3cccc4[nH]c2)(C)C(=O)N2[C@@H](Cc3ccccc3)C(=O)N3[C@@H](CCC3)[C@]12O	Tr	1
Erythromycin	1	O1[C@H](CC)[C@](O)(C)[C@H](O)[C@@H](C)C(=O)[C@@H](C[C@](O)(C)[C@H](O[C@@H]2O[C@@H](C[C@H](N(C)C)[C@H]2O)C)[C@@H](C)[C@H](O[C@@H]2O[C@@H](C)[C@H](O)[C@](OC)(C2)C)[C@@H](C)C1=O)C	Tr	1
ampicillin	1	S1C2N(C(C(O)=O)C1(C)C)C(=O)C2NC(=O)C(N)c1ccccc1	Tr	1
ascorbic acid	1	O1C(C(O)CO)C(=O)C(O)=C1O	Tr	1
bromocriptine mesilate	1	Brc1[nH]c2c3c1CC1N(CC(C=C1c3ccc2)C(=O)NC1(OC2(O)N(C(CC(C)C)C(=O)N3C2CCC3)C1=O)C(C)C)C	Tr	1
candoxatril	0	O(C(=O)[C@@H](CC1(CCCC1)C(=O)NC1CCC(CC1)C(O)=O)COCCOC)c1cc2CCCc2cc1	Tr	1
ciclosporin	1	O=C1N(C)C(C(O)C(CC=CC)C)C(=O)NC(CC)C(=O)N(CC(=O)N(C)C(CC(C)C)C(=O)NC(C(C)C)C(=O)N(C)C(CC(C)C)C(=O)NC(C)C(=O)NC(C)C(=O)N(C)C(CC(C)C)C(=O)N(C)C(CC(C)C)C(=O)N(C)C1C(C)C)C	Tr	1
etretinate	1	O(C)c1cc(C)c(C=CC(=CC=CC(=CC(OCC)=O)C)C)c(C)c1C	Tr	1
frovatriptan	1	O=C(N)c1cc2c3C[C@H](NC)CCc3[nH]c2cc1	Tr	1
mitotane	1	Clc1ccccc1C(C(Cl)Cl)c1ccc(Cl)cc1	Tr	1
penicillamine	1	SC(C(N)C(O)=O)(C)C	Tr	1
promazine	1	S1c2c(N(c3c1cccc3)CCCN(C)C)cccc2	Tr	1
Famotidine	1	s1cc(nc1N=C(N)N)CSCC/C(=N/S(=O)(=O)N)/N	Tr	1
methyldopa	1	Oc1cc(ccc1O)CC(N)(C(O)=O)C	Tr	1
cefcanel	1	s1c(nnc1SCC=1CS[C@H]2N(C=1C(O)=O)C(=O)[C@H]2NC(=O)[C@H](O)c1ccccc1)C	Tr	1
Metaproterenol	1	Oc1cc(cc(O)c1)[C@H](O)CNC(C)C	Tr	1
benazepril	1	O=C1N(c2c(CCC1NC(CCc1ccccc1)C(OCC)=O)cccc2)CC(O)=O	Tr	1
lercanidipine	1	O(C(=O)C=1C(C(C(OC)=O)=C(NC=1C)C)c1cc([N+](=O)[O-])ccc1)C(CN(CCC(c1ccccc1)c1ccccc1)C)(C)C	Tr	1
delapril	1	O(CC)C(=O)[C@@H](N[C@H](C(=O)N(CC(O)=O)C1Cc2c(C1)cccc2)C)CCc1ccccc1	Tr	1
Cymarin	0	O1CC(=CC1=O)[C@H]1CC[C@@]2(O)[C@H]3[C@H](CC[C@@]12C)[C@]1(CC[C@H](O[C@@H]2O[C@@H](C)[C@H](O)[C@H](OC)C2)C[C@@]1(O)CC3)C=O	Tr	1
cefetamet	0	s1cc(nc1N)/C(=N/OC)/C(=O)N[C@H]1[C@H]2SCC(C)=C(N2C1=O)C(O)=O	Tr	1
Rimiterol	0	Oc1cc(ccc1O)[C@H](O)[C@@H]1NCCCC1	Tr	1
chlorothiazide	1	Clc1cc2NC=NS(=O)(=O)c2cc1S(=O)(=O)N	Tr	1
Atenolol	1	O(CC(O)CNC(C)C)c1ccc(cc1)CC(=O)N	Tr	1
Cefpodoxime_proxetil	1	s1cc(nc1N)/C(=N\OC)/C(=O)N[C@H]1[C@H]2SCC(COC)=C(N2C1=O)C(O[C@H](OC(OC(C)C)=O)C)=O	Tr	1
Guanoxan	0	O1c2c(OC[C@H]1CNC(N)=N)cccc2	Tr	1
amiloride	1	Clc1nc(C(=O)\N=C(\N)/N)c(nc1N)N	Tr	1
capreomycin	1	O=C/1N[C@@H]([C@@H]2NC(=NCC2)N)C(=O)NC[C@H](N)C(=O)N[C@@H](C)C(=O)N[C@@H](CNC(=O)C[C@@H](N)CCCN)C(=O)N\C\1=C\NC(=O)N	Tr	1
clopidogrel	1	Clc1ccccc1[C@H](N1CCc2sccc2C1)C(OC)=O	Tr	1
entacapone	1	Oc1c([N+](=O)[O-])cc(cc1O)\C=C(\C(=O)N(CC)CC)/C#N	Tr	1
etoposide	1	O1C[C@H]2[C@@H]([C@@H](c3c(cc4OCOc4c3)[C@H]2O[C@@H]2O[C@H]3[C@@H](O[C@@H](OC3)C)[C@H](O)[C@H]2O)c2cc(OC)c(O)c(OC)c2)C1=O	Tr	1
ranitidine hydrochloride	1	S(Cc1oc(cc1)CN(C)C)CCNC(NC)=C[N+](=O)[O-]	Tr	1
rifabutin	1	O1c2c3c4c(c(O)c2C)C(=O)C(NC(=O)C(=CC=CC(C)C(O)C(C)C(O)C(C)C(OC(=O)C)C(C)C(OC)C=COC1(C)C3=O)C)=C1NC2(N=C14)CCN(CC2)CC(C)C	Tr	1
tegaserod	1	O(C)c1cc2c([nH]cc2\C=N\NC(NCCCCC)=N)cc1	Tr	1
troglitazone	1	S1C(Cc2ccc(OCC3(Oc4c(CC3)c(C)c(O)c(C)c4C)C)cc2)C(=O)NC1=O	Tr	1
Metformin	1	N(C(NC(N)=N)=N)(C)C	Tr	1
triamterene	1	n1c(N)c2nc(-c3ccccc3)c(nc2nc1N)N	Tr	1
Eflornithine	1	FC(F)[C@](N)(CCCN)C(O)=O	Tr	1
levothyroxine sodium	1	Ic1cc(cc(I)c1Oc1cc(I)c(O)c(I)c1)CC(N)C(O)=O	Tr	1
Dipyridamole	1	OCCN(CCO)c1nc(N2CCCCC2)c2nc(nc(N3CCCCC3)c2n1)N(CCO)CCO	Tr	1
loxoprofen	1	O=C1CCCC1Cc1ccc(cc1)C(C(O)=O)C	Tr	1
vigabatrin	1	OC(=O)CCC(N)C=C	Tr	1
Cilazapril	1	O=C1N2N(CCC[C@@H]1N[C@@H](CCc1ccccc1)C(OCC)=O)CCC[C@H]2C(O)=O	Tr	1
penicillin_v	1	S1[C@H]2N([C@@H](C(O)=O)C1(C)C)C(=O)[C@H]2NC(=O)COc1ccccc1	Tr	1
sulphasalazine	0	S(=O)(=O)(Nc1ncccc1)c1ccc(N\N=C/2\C=C(C(O)=O)C(=O)C=C\2)cc1	Tr	1
Fenoterol	1	Oc1cc(cc(O)c1)[C@H](O)CN[C@H](Cc1ccc(O)cc1)C	Tr	1
Ivermectin	1	O1[C@H]2C[C@@]3(O[C@@H]4[C@H](C3)[C@H](C)[C@@H]4[C@H](CC)C)O[C@H](C\C=C(\C)/[C@H](O[C@@H]3O[C@H](C)[C@@H](O[C@@H]4O[C@@H](C)[C@H](O)[C@@H](OC)C4)[C@H](OC)C3)[C@@H](\C=C\C=C\3/CO[C@@H]4[C@@H](O)C(=C[C@@H]([C@]/34O)C1=O)C)C)C2	Tr	1
Oxycodone	1	O1[C@@H]2[C@]34CCN([C@H](Cc5c3c1c(OC)cc5)[C@]4(O)CCC2=O)C	Tr	1
Pirbuterol	1	Oc1ccc(nc1CO)[C@H](O)CNC(C)(C)C	Tr	1
Reproterol	0	Oc1cc(cc(O)c1)[C@H](O)CNCCCn1c2c(nc1)N(C)C(=O)N(C)C2=O	Tr	1
Ziprasidone	1	Clc1cc2NC(=O)Cc2cc1CCN1CCN(CC1)c1nsc2c1cccc2	Tr	1
carbidopa	1	Oc1cc(ccc1O)CC(NN)(C(O)=O)C	Tr	1
cefixime	1	s1cc(nc1N)C(=NOCC(O)=O)C(=O)NC1C2SCC(C=C)=C(N2C1=O)C(O)=O	Tr	1
gestrinone	1	OC1(CCC2C3C(=C4C(=CC(=O)CC4)CC3)C=CC12CC)C#C	Tr	1
pergolide mesilate	1	S(CC1CC2C(N(C1)CCC)Cc1c3c2cccc3[nH]c1)C	Tr	1
progabide	1	Clc1ccc(cc1)/C(/NCCCC(=O)N)=C\1/C=C(F)C=CC/1=O	Tr	1
quinapril hydrochloride	1	O(C(=O)C(NC(C(=O)N1Cc2c(CC1C(O)=O)cccc2)C)CCc1ccccc1)CC	Tr	1
raloxifene	1	s1c2c(ccc(O)c2)c(C(=O)c2ccc(OCCN3CCCCC3)cc2)c1-c1ccc(O)cc1	Tr	1
thioridazine	1	S1c2c(N(c3c1cccc3)CCC1N(CCCC1)C)cc(SC)cc2	Tr	1
Furosemide	1	Clc1cc(NCc2occc2)c(cc1S(=O)(=O)N)C(O)=O	Tr	1
quinaprilat	1	OC(=O)[C@H]1N(Cc2c(C1)cccc2)C(=O)[C@@H](N[C@@H](CCc1ccccc1)C(O)=O)C	Tr	1
Sulfasalazine	1	S(=O)(=O)(Nc1ncccc1)c1ccc(\N=N\c2cc(C(O)=O)c(O)cc2)cc1	Tr	1
Terbutaline	1	Oc1cc(cc(O)c1)[C@H](O)CNC(C)(C)C	Tr	1
Metolazone	1	Clc1cc2N[C@H](N(c3ccccc3C)C(=O)c2cc1S(=O)(=O)N)C	Tr	1
Chlorthalidone	1	Clc1ccc(cc1S(=O)(=O)N)[C@@]1(O)NC(=O)c2c1cccc2	Tr	1
formoterol_fumarate	0	O(C)c1ccc(cc1)C[C@H](NC[C@H](O)c1cc(NC=O)c(O)cc1)C	Tr	1
loperamide hydrochloride	1	Clc1ccc(cc1)C1(O)CCN(CC1)CCC(C(=O)N(C)C)(c1ccccc1)c1ccccc1	Tr	1
sematilide	0	S(=O)(=O)(Nc1ccc(cc1)C(=O)NCCN(CC)CC)C	Tr	1
vitamin_e	1	O1c2c(CC[C@]1(CCC[C@@H](CCC[C@@H](CCCC(C)C)C)C)C)c(C)c(O)c(C)c2C	Tr	1
Hydroflumethiazide	1	S(=O)(=O)(N)c1cc2S(=O)(=O)NCNc2cc1C(F)(F)F	Tr	1
Sumatriptan	1	S(=O)(=O)(NC)Cc1cc2c([nH]cc2CCN(C)C)cc1	Tr	1
Hydrochlorothiazide	1	Clc1cc2NCNS(=O)(=O)c2cc1S(=O)(=O)N	Tr	1
Mibefradil	1	Fc1cc2c(cc1)[C@H](C(C)C)[C@](OC(=O)COC)(CC2)CCN(CCCc1[nH]c2c(n1)cccc2)C	Tr	1
bosentan	1	S(=O)(=O)(Nc1nc(nc(OCCO)c1Oc1ccccc1OC)-c1ncccn1)c1ccc(cc1)C(C)(C)C	Tr	1
Anagrelide	1	Clc1c2CN3CC(=O)NC3=Nc2ccc1Cl	Tr	1
Benserazide	0	Oc1c(O)c(O)ccc1CNNC(=O)[C@H](N)CO	Tr	1
Bromhexine	1	Brc1cc(Br)cc(CN(C)C2CCCCC2)c1N	Tr	1
Etodolac	1	O1CCc2c([nH]c3c2cccc3CC)[C@@]1(CC(O)=O)CC	Tr	1
Famciclovir	1	O(C(=O)C)CC(CCn1c2nc(ncc2nc1)N)COC(=O)C	Tr	1
Isocarboxazid	1	o1nc(cc1C)C(=O)NNCc1ccccc1	Tr	1
Mianserin	1	N12[C@@H](c3c(Cc4c1cccc4)cccc3)CN(CC2)C	Tr	1
Moxisylyte	1	O(C(=O)C)c1cc(C(C)C)c(OCCN(C)C)cc1C	Tr	1
Naratriptan	1	S(=O)(=O)(NC)CCc1cc2cc([nH]c2cc1)C1CCN(CC1)C	Tr	1
Pimozide	1	Fc1ccc(cc1)C(CCN1CCC(N2c3c(NC2=O)cccc3)CC1)c1ccc(F)cc1	Tr	1
imidapril	0	O=C1N(C(=O)[C@@H](N[C@@H](CCc2ccccc2)C(OCC)=O)C)[C@@H](CN1C)C(O)=O	Tr	1
methotrexate	1	OC(=O)CC[C@H](NC(=O)c1ccc(N(Cc2nc3c(nc(nc3N)N)nc2)C)cc1)C(O)=O	Tr	1
olopatadine_hydrochloride	1	O1Cc2c(cccc2)/C(/c2cc(ccc12)CC(O)=O)=C/CCN(C)C	Tr	1
sulfapyridine	1	S(=O)(=O)(Nc1ncccc1)c1ccc(N)cc1	Tr	1
Recainam	0	O=C(Nc1c(cccc1C)C)NCCCNC(C)C	Tr	1
norfloxacin	1	Fc1cc2c(N(C=C(C(O)=O)C2=O)CC)cc1N1CCNCC1	Tr	1
prazosin	1	o1cccc1C(=O)N1CCN(CC1)c1nc(N)c2cc(OC)c(OC)cc2n1	Tr	1
Ceftizoxime	1	s1cc(nc1N)/C(=N/OC)/C(=O)N[C@H]1[C@H]2SCC=C(N2C1=O)C(O)=O	Tr	1
Cycloserine	1	O1NC(=O)[C@@H](N)C1	Tr	1
Benzbromarone	0	Brc1cc(cc(Br)c1O)C(=O)c1c2c(oc1CC)cccc2	Tr	1
Quetiapine	1	S1c2c(cccc2)C(=Nc2c1cccc2)N1CCN(CC1)CCOCCO	Tr	1
ciprofloxacin	1	Fc1cc2c(N(C=C(C(O)=O)C2=O)C2CC2)cc1N1CCNCC1	Tr	1
spironolactone	1	S(C(=O)C)[C@H]1[C@H]2[C@@H]3CC[C@]4(OC(=O)CC4)[C@]3(CC[C@@H]2[C@@]2(C(=CC(=O)CC2)C1)C)C	Tr	1
Estramustine	1	ClCCN(CCCl)C(Oc1cc2CC[C@H]3[C@@H]4CC[C@H](O)[C@]4(CC[C@@H]3c2cc1)C)=O	Tr	1
Ketoconazole	1	Clc1cc(Cl)ccc1[C@]1(O[C@@H](CO1)COc1ccc(N2CCN(CC2)C(=O)C)cc1)Cn1ccnc1	Tr	1
Mesna	1	S(O)(=O)(=O)CCS	Tr	1
Oseltamivir	1	O(C(CC)CC)[C@@H]1C=C(C[C@H](N)[C@H]1NC(=O)C)C(OCC)=O	Tr	1
Primidone	1	O=C1NCNC(=O)C1(CC)c1ccccc1	Tr	1
cefatrizine	0	S1[C@H]2N(C(C(O)=O)=C(C1)CSc1n[nH]nc1)C(=O)[C@H]2NC(=O)[C@H](N)c1ccc(O)cc1	Tr	1
cloxacillin	1	Clc1ccccc1-c1noc(C)c1C(=O)N[C@H]1[C@H]2SC(C)(C)[C@@H](N2C1=O)C(O)=O	Tr	1
fludarabine-phosphate	1	P(OCC1OC(n2c3nc(F)nc(N)c3nc2)C(O)C1O)(O)(O)=O	Tr	1
folic-acid	1	O=C1N=C(Nc2ncc(nc12)CNc1ccc(cc1)C(=O)NC(CCC(O)=O)C(O)=O)N	Tr	1
lodoxamide trometamol	1	Clc1c(NC(=O)C(O)=O)cc(cc1NC(=O)C(O)=O)C#N	Tr	1
oxiracetam	0	OC1CC(=O)N(C1)CC(=O)N	Tr	1
saxagliptin	1	OC12CC3(CC(C1)CC(C3)C2)[C@H](N)C(=O)N1[C@@H]2[C@H](C[C@H]1C#N)C2	Tr	1
Propylthiouracil	1	S=C1NC(=CC(=O)N1)CCC	Tr	1
xipamide	0	Clc1cc(O)c(cc1S(=O)(=O)N)C(=O)Nc1c(cccc1C)C	Tr	1
Ethylmorphine	1	O1[C@@H]2[C@]34[C@@H]([C@H](N(CC3)CC)Cc3c4c1c(O)cc3)C=C[C@@H]2O	Tr	1
Pantoprazole	1	S(=O)(Cc1nccc(OC)c1OC)c1[nH]c2c(n1)cc(OC(F)F)cc2	Tr	1
mercaptoethanesulfonic acid	0	S(O)(=O)(=O)CCS	Tr	1
Ethambutol	1	OC[C@@H](NCCN[C@@H](CC)CO)CC	Tr	1
Guanabenz	1	Clc1cccc(Cl)c1\C=N\NC(N)=N	Tr	1
Mefloquine	1	FC(F)(F)c1c2nc(cc(c2ccc1)[C@@H](O)[C@@H]1NCCCC1)C(F)(F)F	Tr	1
Zatebradin	0	O(C)c1cc(ccc1OC)CCN(CCCN1CCc2cc(OC)c(OC)cc2CC1=O)C	Tr	1
Metopirone	1	O=C(C(C)(C)c1cccnc1)c1cccnc1	Tr	1
Acetohexamide	1	S(=O)(=O)(NC(=O)NC1CCCCC1)c1ccc(cc1)C(=O)C	Tr	1
Allopurinol	1	Oc1ncnc2[nH]ncc12	Tr	1
Chlorpheniramine	1	Clc1ccc(N(CCN(C)C)c2ncccc2)cc1	Tr	1
Cyproheptadine	1	N1(CCC(CC1)=C1c2c(C=Cc3c1cccc3)cccc2)C	Tr	1
Floxacillin	1	Clc1cccc(F)c1-c1noc(C)c1C(=O)N[C@H]1[C@H]2SC(C)(C)[C@@H](N2C1=O)C(O)=O	Tr	1
Flunarizine	1	Fc1ccc(cc1)C(N1CCN(CC1)C\C=C\c1ccccc1)c1ccc(F)cc1	Tr	1
Flunisolide	1	F[C@H]1C2=CC(=O)C=C[C@@]2([C@@H]2[C@H]([C@H]3C[C@H]4OC(O[C@@]4(C(=O)CO)[C@]3(C[C@H]2O)C)(C)C)C1)C	Tr	1
Fluoxetine	1	FC(F)(F)c1ccc(O[C@H](CCNC)c2ccccc2)cc1	Tr	1
Guanadrel	1	O1[C@H](COC12CCCCC2)CNC(N)=N	Tr	1
Isoniazid	1	O=C(NN)c1ccncc1	Tr	1
Itraconazole	1	Clc1cc(Cl)ccc1[C@@]1(O[C@H](CO1)COc1ccc(N2CCN(CC2)c2ccc(N3C=NN([C@H](CC)C)C3=O)cc2)cc1)Cn1ncnc1	Tr	1
Losartan	1	Clc1nc(n(Cc2ccc(cc2)-c2ccccc2-c2[nH]nnn2)c1CO)CCCC	Tr	1
Mesalamine	1	Oc1ccc(N)cc1C(O)=O	Tr	1
Methadone	1	O=C(C(C[C@H](N(C)C)C)(c1ccccc1)c1ccccc1)CC	Tr	1
Methylphenidate	1	O(C(=O)[C@@H]([C@@H]1NCCCC1)c1ccccc1)C	Tr	1
Modafinil	1	S(=O)(C(c1ccccc1)c1ccccc1)CC(=O)N	Tr	1
Nabumetone	1	O(C)c1cc2c(cc(cc2)CCC(=O)C)cc1	Tr	1
Omeprazole	1	S(=O)(Cc1ncc(C)c(OC)c1C)c1nc2cc(OC)ccc2[n-]1	Tr	1
Oxamniquine	1	OCc1cc2CC[C@H](Nc2cc1[N+](=O)[O-])CNC(C)C	Tr	1
Pizotyline	0	s1c2c(cc1)C(c1c(CC2)cccc1)=C1CCN(CC1)C	Tr	1
Pramipexole	1	s1c2C[C@@H](NCCC)CCc2nc1N	Tr	1
Terbinafine	1	N(Cc1c2c(ccc1)cccc2)(C\C=C\C#CC(C)(C)C)C	Tr	1
Ticlopidine	1	Clc1ccccc1CN1CCc2sccc2C1	Tr	1
Trimeprazine	1	S1c2c(N(c3c1cccc3)C[C@H](CN(C)C)C)cccc2	Tr	1
Vitamin_A	1	OC\C=C(\C=C\C=C(\C=C\C=1C(CCCC=1C)(C)C)/C)/C	Tr	1
apricitabine	0	S1[C@@H](OC[C@@H]1N1C=CC(=NC1=O)N)CO	Tr	1
chlorphenamine maleate	1	Clc1ccc(cc1)C(CCN(C)C)c1ncccc1	Tr	1
clenbuterol	1	Clc1cc(cc(Cl)c1N)C(O)CNC(C)(C)C	Tr	1
etofylline	0	O=C1N(C)C(=O)N(c2ncn(c12)CCO)C	Tr	1
fenbufen	1	OC(=O)CCC(=O)c1ccc(cc1)-c1ccccc1	Tr	1
flucloxacillin	1	Clc1cccc(F)c1-c1noc(C)c1C(=O)N[C@H]1[C@H]2SC(C)(C)[C@@H](N2C1=O)C(O)=O	Tr	1
flunitrazepam	1	Fc1ccccc1C1=NCC(=O)N(c2c1cc([N+](=O)[O-])cc2)C	Tr	1
hydrocodone	1	O1[C@@H]2[C@]34[C@H]([C@H](N(CC3)C)Cc3c4c1c(OC)cc3)CCC2=O	Tr	1
hydroxyzine	1	Clc1ccc(cc1)C(N1CCN(CC1)CCOCCO)c1ccccc1	Tr	1
leflunomide	1	FC(F)(F)c1ccc(NC(=O)c2cnoc2C)cc1	Tr	1
mirtazapine	1	n1c2N3C(c4c(Cc2ccc1)cccc4)CN(CC3)C	Tr	1
retinol	1	OCC=C(C=CC=C(C=CC=1C(CCCC=1C)(C)C)C)C	Tr	1
rifampin	1	O1c2c3c4c(c(O)c2C)c(O)c(NC(=O)\C(=C\C=C\C(C)C(O)C(C)C(O)C(C)C(OC(=O)C)C(C)C(OC)\C=C/OC1(C)C3=O)\C)c(\C=N\N1CCN(CC1)C)c4O	Tr	1
tetracycline	1	OC=1[C@@H](N(C)C)[C@@H]2C[C@H]3C(=C(O)[C@]2(O)C(=O)C=1C(=O)N)C(=O)c1c(cccc1O)[C@]3(O)C	Tr	1
trimethobenzamide	1	O(C)c1c(OC)cc(cc1OC)C(=O)NCc1ccc(OCCN(C)C)cc1	Tr	1
desvenlafaxine_succinate	1	OC1(CCCCC1)C(CN(C)C)c1ccc(O)cc1	Tr	1
Piroximone	0	O=C1NC(C(=O)c2ccncc2)=C(N1)CC	Tr	1
sulfamerazine	1	S(=O)(=O)(Nc1nc(ccn1)C)c1ccc(N)cc1	Tr	1
Aspirin	1	O(C(=O)C)c1ccccc1C(O)=O	Tr	1
Ibutilide	1	S(=O)(=O)(Nc1ccc(cc1)[C@H](O)CCCN(CCCCCCC)CC)C	Tr	1
Methylprednisolone	1	O=C1C=C2[C@@]([C@@H]3[C@H]([C@@H]4CC[C@](O)(C(=O)CO)[C@]4(C[C@@H]3O)C)C[C@@H]2C)(C=C1)C	Tr	1
Mifobate	0	Clc1ccc(cc1)[C@H](P(OC)(OC)=O)OP(OC)(OC)=O	Tr	1
cyclophosphamide	1	ClCCN(P1(OCCCN1)=O)CCCl	Tr	1
Albuterol	1	Oc1ccc(cc1CO)[C@@H](O)CNC(C)(C)C	Tr	1
Milrinone	1	O=C1NC(C)=C(C=C1C#N)c1ccncc1	Tr	1
Nateglinide	1	OC(=O)[C@@H](NC(=O)C1CCC(CC1)C(C)C)Cc1ccccc1	Tr	1
acetylprocainamide	0	O=C(NCCN(CC)CC)c1ccc(NC(=O)C)cc1	Tr	1
pioglitazone	1	S1C(Cc2ccc(OCCc3ncc(cc3)CC)cc2)C(=O)NC1=O	Tr	1
pomalidomide	1	O=C1NC(=O)CCC1N1C(=O)c2c(cccc2N)C1=O	Tr	1
Bromazepam	1	Brc1cc2c(NC(=O)CN=C2c2ncccc2)cc1	Tr	1
Propiverine	0	O(C(=O)C(OCCC)(c1ccccc1)c1ccccc1)C1CCN(CC1)C	Tr	1
captopril	1	SCC(C(=O)N1CCCC1C(O)=O)C	Tr	1
ezogabine	1	Fc1ccc(cc1)CNc1cc(N)c(NC(OCC)=O)cc1	Tr	1
milnacipran	1	O=C(N(CC)CC)C1(CC1CN)c1ccccc1	Tr	1
ramelteon	1	O1CCc2c3c(CC[C@H]3CCNC(=O)CC)ccc12	Tr	1
Acetaminophen	1	Oc1ccc(NC(=O)C)cc1	Tr	1
Dolasetron	1	O(C(=O)c1c2c([nH]c1)cccc2)C1C[C@@H]2N3[C@H](C1)CC(C2)C(=O)C3	Tr	1
Fenoprofen	1	O(c1cc(ccc1)[C@H](C(O)=O)C)c1ccccc1	Tr	1
Isoproterenol	1	Oc1cc(ccc1O)[C@H](O)NC(C)C	Tr	1
Lansoprazole	1	S(=O)(Cc1nccc(OCC(F)(F)F)c1C)c1[nH]c2c(n1)cccc2	Tr	1
Molecule-618	0	O(C)c1cc2c(nccc2[C@H](O)[C@@H]2N3C[C@@H]([C@H](C2)CC3)C=C)cc1	Tr	1
Oxyfedrine	1	O(C)c1cc(ccc1)C(=O)CCN[C@H]([C@@H](O)c1ccccc1)C	Tr	1
Sulfamethizole	1	s1c(nnc1NS(=O)(=O)c1ccc(N)cc1)C	Tr	1
Triazolam	1	Clc1ccccc1C1=NCc2[nH+]nc(n2-c2c1cc(Cl)cc2)C	Tr	1
Zalcitabine	1	O1[C@@H](CC[C@@H]1N1C=CC(=NC1=O)N)CO	Tr	1
delavirdine	1	S(=O)(=O)(Nc1cc2cc([nH]c2cc1)C(=O)N1CCN(CC1)c1ncccc1NC(C)C)C	Tr	1
enzalutamide	1	S=C1N(C(C)(C)C(=O)N1c1cc(C(F)(F)F)c(cc1)C#N)c1cc(F)c(cc1)C(=O)NC	Tr	1
isoprenaline hydrochloride	1	Oc1cc(ccc1O)C(O)CNC(C)C	Tr	1
norfenfluramine	0	FC(F)(F)c1cc(ccc1)CC(N)C	Tr	1
procainamide	1	O=C(NCCN(CC)CC)c1ccc(N)cc1	Tr	1
quinine	1	O(C)c1cc2c(nccc2[C@@H](O)[C@H]2N3C[C@@H]([C@H](C2)CC3)C=C)cc1	Tr	1
rufinamide	1	Fc1cccc(F)c1Cn1nnc(c1)C(=O)N	Tr	1
vildagliptin	1	OC12CC3(NCC(=O)N4CCC[C@H]4C#N)CC(C1)CC(C3)C2	Tr	1
viomycin	1	O=C/1N[C@@H]([C@@H]2NC(N[C@@H](O)C2)=N)C(=O)NC[C@H](NC(=O)C[C@@H](N)CCCN)C(=O)N[C@@H](CO)C(=O)N[C@@H](CO)C(=O)N\C\1=C/NC(=O)N	Tr	1
Lamivudine	1	S1C[C@@H](O[C@H]1CO)N1C=CC(=NC1=O)N	Tr	1
Topiramate	1	S(OC[C@]12OC(O[C@H]1[C@@H]1OC(O[C@@H]1CO2)(C)C)(C)C)(=O)(=O)N	Tr	1
levodopa	1	Oc1cc(ccc1O)C[C@H](N)C(O)=O	Tr	1
sertraline hydrochloride	1	Clc1cc(ccc1Cl)[C@@H]1CC[C@H](NC)c2c1cccc2	Tr	1
paricalcitol	1	O[C@@H]1C\C(\C[C@@H](O)C1)=C\C=C/1\[C@@H]2CC[C@H]([C@@H](\C=C\[C@@H](C(O)(C)C)C)C)[C@]2(CCC\1)C	Tr	1
Benzydamine	1	O(CCCN(C)C)c1nn(c2c1cccc2)Cc1ccccc1	Tr	1
Bupropion	1	Clc1cc(ccc1)C(=O)[C@H](NC(C)(C)C)C	Tr	1
Cimetidine	1	S(Cc1nc[nH]c1C)CCN\C(=N\C#N)\NC	Tr	1
Clindamycin	1	Cl[C@@H]([C@H](NC(=O)[C@H]1N(C[C@@H](C1)CCC)C)[C@H]1O[C@H](SC)[C@H](O)[C@@H](O)[C@H]1O)C	Tr	1
Clobazam	1	Clc1cc2N(C(=O)CC(=O)N(c2cc1)C)c1ccccc1	Tr	1
aripiprazole	1	Clc1c(N2CCN(CC2)CCCCOc2cc3NC(=O)CCc3cc2)cccc1Cl	Tr	1
azathioprine	1	S(c1n(cnc1[N+](=O)[O-])C)c1[nH]cnc-2ncnc1-2	Tr	1
hydromorphone hydrochloride	1	O1[C@@H]2[C@]34[C@H]([C@H](N(CC3)C)Cc3c4c1c(O)cc3)CCC2=O	Tr	1
monoxidine	0	Clc1nc(nc(OC)c1NC=1NCCN=1)C	Tr	1
emodin	0	Oc1c2c(cc(c1)C)C(=O)c1c(C2=O)c(O)cc(O)c1	Tr	1
Acrivastine	1	OC(=O)\C=C\c1nc(ccc1)/C(=C/CN1CCCC1)/c1ccc(cc1)C	Tr	1
Disulfiram	1	S(SC(=S)N(CC)CC)C(=S)N(CC)CC	Tr	1
Misoprostol	1	O=C1C[C@H](O)[C@H](\C=C\C[C@@](O)(CCCC)C)[C@H]1CCCCCCC(OC)=O	Tr	1
Moclobemide	1	Clc1ccc(cc1)C(=O)NCCN1CCOCC1	Tr	1
Moxonidine	1	Clc1nc(nc(OC)c1NC=1NCCN=1)C	Tr	1
Nitrendipine	1	O(C(=O)C=1[C@@H](C(C(OC)=O)=C(NC=1C)C)c1cc([N+](=O)[O-])ccc1)CC	Tr	1
Trovafloxacin	1	Fc1cc(F)ccc1N1C=C(C(O)=O)C(=O)c2cc(F)c(nc12)N1C[C@@H]2[C@H](C1)C2N	Tr	1
dexfenfluramine hydrochloride	1	FC(F)(F)c1cc(ccc1)CC(NCC)C	Tr	1
Chloramphenicol	1	ClC(Cl)C(=O)N[C@@H]([C@H](O)c1ccc([N+](=O)[O-])cc1)CO	Tr	1
Sultopride	1	S(=O)(=O)(CC)c1cc(C(=O)NC[C@H]2N(CCC2)CC)c(OC)cc1	Tr	1
Tenidap	1	Clc1cc\2c(N(C(=O)N)C(=O)/C/2=C(/O)\c2sccc2)cc1	Tr	1
chloroxine	1	Clc1cc(Cl)c2c(nccc2)c1O	Tr	1
enoxacin	1	Fc1cc2c(nc1N1CCNCC1)N(C=C(C(O)=O)C2=O)CC	Tr	1
febuxostat	1	s1c(nc(C)c1C(O)=O)-c1cc(C#N)c(OCC(C)C)cc1	Tr	1
glycerylnitrate	0	O([N+](=O)[O-])CC(O)CO	Tr	1
Almitrine	1	Fc1ccc(cc1)C(N1CCN(CC1)c1nc(nc(n1)NCC=C)NCC=C)c1ccc(F)cc1	Tr	1
Alprazolam	1	Clc1cc2c(-n3c(nnc3C)CN=C2c2ccccc2)cc1	Tr	1
Amphetamine	1	N[C@@H](Cc1ccccc1)C	Tr	1
Azatadine	1	n1c2c(CCc3c(cccc3)C2=C2CCN(CC2)C)ccc1	Tr	1
Betaxolol	1	O(C[C@@H](O)CNC(C)C)c1ccc(cc1)CCOCC1CC1	Tr	1
Bicalutamide	1	S(=O)(=O)(c1c(C)c(cc(NC(=O)[C@H](O)C)c1C#N)C(F)(F)F)c1ccc(F)cc1	Tr	1
Bisoprolol	1	O(C[C@@H](O)CNC(C)C)c1ccc(cc1)COCCOC(C)C	Tr	1
Chlorzoxazone	1	Clc1cc2NC(Oc2cc1)=O	Tr	1
Dapsone	1	S(=O)(=O)(c1ccc(N)cc1)c1ccc(N)cc1	Tr	1
Dexamethasone	1	F[C@@]12[C@H]([C@@H]3C[C@@H](C)[C@](O)(C(=O)CO)[C@]3(C[C@@H]1O)C)CCC1=CC(=O)C=C[C@@]12C	Tr	1
Diflunisal	1	Fc1cc(F)ccc1-c1cc(C(O)=O)c(O)cc1	Tr	1
Diloxanide	1	ClC(Cl)C(=O)N(C)c1ccc(O)cc1	Tr	1
Ethacrynic_acid	1	Clc1c(Cl)c(OCC(O)=O)ccc1C(=O)C(=O)CC	Tr	1
Ethionamide	1	S=C(N)c1cc(ncc1)CC	Tr	1
Feprazone	0	O=C1N(N(C(=O)C1CC=C(C)C)c1ccccc1)c1ccccc1	Tr	1
Flutamide	1	FC(F)(F)c1cc(NC(=O)C(C)C)ccc1[N+](=O)[O-]	Tr	1
Fluvoxamine	1	FC(F)(F)c1ccc(cc1)/C(=N/OCCN)/CCCCOC	Tr	1
Hydroxychloroquine	1	Clc1cc2nccc(N[C@@H](CCN(CCO)CC)C)c2cc1	Tr	1
Hydroxyprogesterone_caproate	1	O=C1CC[C@@]2([C@@H]3[C@H]([C@@H]4CC[C@](OC(=O)CCCCC)(C(=O)C)[C@]4(CC3)C)C=CC2=C1)C	Tr	1
Isosorbide_dinitrate	1	O1[C@H]2[C@H](OC[C@@H]2O[N+](=O)[O-])[C@H](O[N+](=O)[O-])C1	Tr	1
Ketotifen	1	s1c2c(cc1)C(c1c(CC2=O)cccc1)=C1CCN(CC1)C	Tr	1
Levosimendan	1	O=C1NN=C([C@@H](C1)C)c1ccc(NN=C(C#N)C#N)cc1	Tr	1
Loratadine	1	Clc1cc2c(cc1)C(c1ncccc1CC2)=C1CCN(CC1)C(OCC)=O	Tr	1
Mebeverine	1	O(C)c1cc(ccc1OC)C(OCCCCN([C@H](Cc1ccc(OC)cc1)C)CC)=O	Tr	1
Meloxicam	1	s1c(cnc1NC(=O)C=1N(S(=O)(=O)c2c(cccc2)C=1O)C)C	Tr	1
Mestranol	1	O(C)c1cc2CC[C@H]3[C@@H]4CC[C@](O)(C#C)[C@]4(CC[C@@H]3c2cc1)C	Tr	1
Mifepristone	1	O=C1CCC2=C3[C@H]([C@@H]4CC[C@@](O)(C#C)[C@]4(C[C@@H]3c3ccc(N(C)C)cc3)C)CCC2=C1	Tr	1
Morphine	1	O1[C@@H]2[C@]34[C@H]([C@H](N(CC3)C)Cc3c4c1c(O)cc3)C=C[C@@H]2O	Tr	1
Moxifloxacin	1	Fc1cc2c(N(C=C(C(O)=O)C2=O)C2CC2)c(OC)c1N1C[C@H]2[C@H](NCCC2)C1	Tr	1
Nalidixic_acid	1	O=C1c2ccc(nc2N(C=C1C(O)=O)CC)C	Tr	1
Nifedipine	1	O(C(=O)C)C=1[C@@H](C(C(OC)=O)=C(NC=1C)C)c1ccccc1[N+](=O)[O-]	Tr	1
Nisoldipine	1	O(C(=O)C=1[C@H](C(C(OC)=O)=C(NC=1C)C)c1ccccc1[N+](=O)[O-])CC(C)C	Tr	1
Papaverine	1	O(C)c1cc(ccc1OC)Cc1nccc2c1cc(OC)c(OC)c2	Tr	1
Phenazopyridine	1	n1c(N)c(\N=N\c2ccccc2)ccc1N	Tr	1
Phenytoin	1	O=C1NC(=O)NC1(c1ccccc1)c1ccccc1	Tr	1
Pindolol	1	O(C[C@H](O)CNC(C)C)c1c2c([nH]cc2)ccc1	Tr	1
Protionamide	0	S=C(N)c1cc(ncc1)CCC	Tr	1
Quinalbarbitone	1	O=C1NC(=O)NC(=O)C1([C@H](CCC)C)CC=C	Tr	1
Rabeprazole	1	S(=O)(Cc1nccc(OCCCOC)c1C)c1[nH]c2c(n1)cccc2	Tr	1
Riluzole	1	s1c2cc(OC(F)(F)F)ccc2nc1N	Tr	1
Rizatriptan	1	[nH]1cc(c2cc(ccc12)Cn1ncnc1)CCN(C)C	Tr	1
Sparfloxacin	1	Fc1c(N2C[C@H](N[C@H](C2)C)C)c(F)c2N(C=C(C(O)=O)C(=O)c2c1N)C1CC1	Tr	1
Sulfisomidine	0	S(=O)(=O)(Nc1nc(nc(c1)C)C)c1ccc(N)cc1	Tr	1
Sulindac	1	S(=O)(C)c1ccc(cc1)\C=C/1\c2c(cc(F)cc2)C(CC(O)=O)=C\1C	Tr	1
Telithromycin	1	O1[C@@H](CC)[C@]2(OC(=O)N([C@H]2[C@@H](C)C(=O)[C@H](C[C@](OC)(C)[C@@H](O[C@@H]2O[C@H](C[C@H](N(C)C)[C@@H]2O)C)[C@@H](C)C(=O)[C@@H](C)C1=O)C)CCCCn1cc(nc1)-c1cccnc1)C	Tr	1
Thiabendazole	1	s1cc(nc1)-c1[nH]c2c(n1)cccc2	Tr	1
Tiagabine	1	s1ccc(C)c1C(=CCCN1C[C@@H](CCC1)C(O)=O)c1sccc1C	Tr	1
Tolazoline	1	N1CCN=C1Cc1ccccc1	Tr	1
Tolbutamide	1	S(=O)(=O)(NC(=O)NCCCC)c1ccc(cc1)C	Tr	1
Triamcinolone_acetonide	1	F[C@@]12[C@H]([C@@H]3C[C@H]4OC(O[C@@]4(C(=O)CO)[C@]3(C[C@@H]1O)C)(C)C)CCC1=CC(=O)C=C[C@@]12C	Tr	1
acenocoumarol	1	O1c2c(cccc2)C(O)=C(C(CC(=O)C)c2ccc([N+](=O)[O-])cc2)C1=O	Tr	1
acetylcysteine	1	SCC(NC(=O)C)C(O)=O	Tr	1
bupivacaine	1	O=C(Nc1c(cccc1C)C)C1NCCCC1CCCC	Tr	1
carbenoxolone sodium	0	O(C(=O)CCC(O)=O)C1CCC2(C3C(CCC2C1(C)C)(C)C1(C(C2CC(CCC2(CC1)C)(C(O)=O)C)=CC3=O)C)C	Tr	1
cefalexin	1	S1C2N(C(=O)C2NC(=O)C(N)c2ccccc2)C(C(O)=O)=C(C1)C	Tr	1
clemastine funurate	1	Clc1ccc(cc1)[C@@](OCC[C@@H]1N(CCC1)C)(C)c1ccccc1	Tr	1
diethylcarbamazine	1	O=C(N(CC)CC)N1CCN(CC1)C	Tr	1
digitoxin	1	O1C(C)C(OC2OC(C)C(O)C(O)C2)C(O)CC1OC1C(OC(OC2CC3CCC4C(CCC5(C)C(CCC45O)C4=CC(OC4)=O)C3(CC2)C)CC1O)C	Tr	1
diphenhydramine hydrochloride	1	O(C(c1ccccc1)c1ccccc1)CCN(C)C	Tr	1
diphenoxylate	1	O(C(=O)C1(CCN(CC1)CCC(C#N)(c1ccccc1)c1ccccc1)c1ccccc1)CC	Tr	1
doxifluridine	0	FC1=CN([C@@H]2O[C@H](C)[C@@H](O)[C@H]2O)C(=O)NC1=O	Tr	1
ertapenem	1	S([C@H]1C[C@H](NC1)C(=O)Nc1cc(ccc1)C(O)=O)C=1[C@@H]([C@H]2N(C=1C(O)=O)C(=O)[C@@H]2[C@H](O)C)C	Tr	1
floxuridine	1	FC1=CN([C@@H]2O[C@H](CO)[C@@H](O)C2)C(=O)NC1=O	Tr	1
fluocortolone	1	F[C@@H]1C2=CC(=O)C=C[C@@]2([C@@H]2[C@H]([C@@H]3C[C@@H](C)[C@H](C(=O)CO)[C@]3(C[C@@H]2O)C)C1)C	Tr	1
ginkgolide_a	1	O1C2CC34C56C(OC(=O)C5O)OC3(C2(O)C(C)C1=O)C(OC4CC6C(C)(C)C)=O	Tr	1
indapamide	1	Clc1ccc(cc1S(=O)(=O)N)C(=O)NN1c2c(CC1C)cccc2	Tr	1
meprobamate	1	O(CC(CCC)(COC(=O)N)C)C(=O)N	Tr	1
nitisinone	1	FC(F)(F)c1cc([N+](=O)[O-])c(cc1)C(=O)C1C(=O)CCCC1=O	Tr	1
pregabalin	1	OC(=O)C[C@H](CC(C)C)CN	Tr	1
sufentanil	1	s1cccc1CCN1CCC(N(C(=O)CC)c2ccccc2)(CC1)COC	Tr	1
terazocin	1	N1(CC=CC=CC=C1)C=1N(N2CC=CC=CC=C2)CC=CC=CC=1	Tr	1
Diltiazem	1	S1c2c(N(CCN(C)C)C(=O)[C@H](OC(=O)C)[C@@H]1c1ccc(OC)cc1)cccc2	Tr	1
Hydrocortisone	1	O=C1CC[C@@]2([C@@H]3[C@H]([C@@H]4CC[C@](O)(C(=O)CO)[C@]4(C[C@H]3O)C)CCC2=C1)C	Tr	1
Naloxone	1	O1[C@@H]2[C@]34CCN([C@H](Cc5c3c1c(O)cc5)[C@]4(O)CCC2=O)CC=C	Tr	1
Saccharin	0	S1(=O)(=O)NC(=O)c2c1cccc2	Tr	1
Terazosin	1	O1CCC[C@H]1C(=O)N1CCN(CC1)c1nc(N)c2cc(OC)c(OC)cc2n1	Tr	1
clorazepate	1	Clc1cc2c(NC(=O)C(N=C2c2ccccc2)C(O)=O)cc1	Tr	1
niacin	1	OC(=O)c1cccnc1	Tr	1
phenylethylmalonamide	0	O=C(N)C(CC)(C(=O)N)c1ccccc1	Tr	1
amoxicillin	1	S1C2N(C(C(O)=O)C1(C)C)C(=O)C2NC(=O)C(N)c1ccc(O)cc1	Tr	1
Isradipine	1	o1[nH][c+]2-[c+]([nH]1)cccc2[C@@H]1C(C(OC(C)C)=O)=C(NC(C)=C1C(OC)=O)C	Tr	1
boceprevir	1	O=C(NC(CC1CCC1)C(=O)C(=O)N)[C@H]1N(C[C@H]2[C@@H]1C2(C)C)C(=O)[C@@H](NC(=O)NC(C)(C)C)C(C)(C)C	Tr	1
lorcaserin_hydrochloride	1	Cl.Clc1cc2c(CCNC[C@@H]2C)cc1	Tr	1
suprofen	1	s1cccc1C(=O)c1ccc(cc1)C(C(O)=O)C	Tr	1
varenicline tartrate	1	n1c2c(ncc1)cc1[C@@H]3C[C@H](c1c2)CNC3	Tr	1
chrysophanol	0	Oc1c2c(cc(c1)C)C(=O)c1c(C2=O)c(O)ccc1	Tr	1
physcion	0	O(C)c1cc(O)c2c(c1)C(=O)c1c(C2=O)c(O)cc(c1)C	Tr	1
Alprenolol	1	O(C[C@@H](O)CNC(C)C)c1ccccc1CC=C	Tr	1
Amrinone	1	O=C1NC=C(C=C1N)c1ccncc1	Tr	1
Codeine	1	O1[C@@H]2[C@]34[C@H]([C@H](N(CC3)C)Cc3c4c1c(OC)cc3)C=C[C@@H]2O	Tr	1
chlorpropamide	1	Clc1ccc(S(=O)(=O)NC(=O)NCCC)cc1	Tr	1
emtricitabine	1	S1C[C@H](O[C@H]1CO)N1C=C(F)C(=NC1=O)N	Tr	1
epristeride	1	OC(=O)C=1CCC2(C3C(C4CCC(C(=O)NC(C)(C)C)C4(CC3)C)CC=C2C=1)C	Tr	1
mazindol	1	Clc1ccc(cc1)C1(O)N2C(=NCC2)c2c1cccc2	Tr	1
pipemidic_acid	0	O=C1c2c(nc(nc2)N2CCNCC2)N(C=C1C(O)=O)CC	Tr	1
rofecoxib	1	S(=O)(=O)(C)c1ccc(cc1)C=1COC(=O)C=1c1ccccc1	Tr	1
pirazolac	0	Clc1ccc(cc1)-c1cn(nc1CC(O)=O)-c1ccc(F)cc1	Tr	1
Clozapine	1	Clc1cc2N=C(N3CCN(CC3)C)c3c(Nc2cc1)cccc3	Tr	1
Dienogest	1	O=C1CCC=2C(=C1)CC[C@H]1[C@@H]3CC[C@](O)(CC#N)[C@@]3(CCC1=2)C	Tr	1
Felodipine	1	Clc1c(cccc1Cl)[C@@H]1C(C(OCC)=O)=C(NC(C)=C1C(OC)=O)C	Tr	1
Fluconazole	1	Fc1cc(F)ccc1C(O)(Cn1ncnc1)Cn1ncnc1	Tr	1
Acitretin	1	O(C)c1cc(C)c(\C=C\C(=C\C=C\C(=C/C(O)=O)\C)\C)c(C)c1C	Tr	1
Amitriptyline	1	N(CCC=C1c2c(CCc3c1cccc3)cccc2)(C)C	Tr	1
Amobarbital	1	O=C1[N-]C(=O)[N-]C(=O)C1(CCC(C)C)CC	Tr	1
Amoxapine	1	Clc1cc2c(Oc3c(N=C2N2CCNCC2)cccc3)cc1	Tr	1
Baclofen	1	Clc1ccc(cc1)[C@H](N)CCC(O)=O	Tr	1
Bifemelane	0	O(CCCCNC)c1ccccc1Cc1ccccc1	Tr	1
Carteolol	1	O(C[C@@H](O)CNC(C)(C)C)c1c2CCC(=O)Nc2ccc1	Tr	1
Cephradine	1	S1[C@H]2N(C(C(O)=O)=C(C1)C)C(=O)[C@H]2NC(=O)[C@H](N)C=1CC=CCC=1	Tr	1
Cinoxacin	1	O1c2c(OC1)cc1N(N=C(C(O)=O)C(=O)c1c2)CC	Tr	1
Clomethiazole	0	ClCCc1scnc1C	Tr	1
Clomipramine	1	Clc1cc2N(c3c(CCc2cc1)cccc3)CCCN(C)C	Tr	1
Clonidine	1	Clc1cccc(Cl)c1N=C1NCCN1	Tr	1
Diethylpropion	1	O=C([C@@H](N(CC)CC)C)c1ccccc1	Tr	1
Disopyramide	1	O=C(N)C(CCN(C(C)C)C(C)C)(c1ccccc1)c1ncccc1	Tr	1
Domperidone	1	Clc1cc2NC(=O)N(NC3CCN(CC3)CCCN3c4c(NC3=O)cccc4)c2cc1	Tr	1
Fenfluramine	1	FC(F)(F)c1cc(ccc1)[C@H](CNCC)C	Tr	1
Fludrocortisone_acetate	1	F[C@@]12[C@H]([C@@H]3CC[C@](O)(C(=O)COC(=O)C)[C@@]3(C[C@H]1O)C)CCC1=CC(=O)CC[C@]12C	Tr	1
Flumazenil	1	Fc1cc2c(-n3c(CN(C)C2=O)c(nc3)C(OCC)=O)cc1	Tr	1
Flurbiprofen	1	Fc1cc(ccc1-c1ccccc1)[C@H](C(O)=O)C	Tr	1
Galantamine	1	O1[C@@H]2[C@@]3(CCN(Cc4c3c1c(OC)cc4)C)C=C[C@H](O)C2	Tr	1
Gliquidone	1	S(=O)(=O)(NC(=O)NC1CCCCC1)c1ccc(cc1)CCN1C(=O)C(c2c(cc(OC)cc2)C1=O)(C)C	Tr	1
Glymidine	1	S(=O)(=O)(Nc1ncc(OCCOC)cn1)c1ccccc1	Tr	1
Hexobarbital	1	O=C1N(C)C(=O)NC(=O)[C@@]1(C)C=1CCCCC=1	Tr	1
Ketorolac	1	OC(=O)[C@H]1CCn2c1ccc2C(=O)c1ccccc1	Tr	1
Labetalol	1	Oc1ccc(cc1C(=O)N)[C@H](O)CN[C@@H](CCc1ccccc1)C	Tr	1
Levamisole	1	S1CCN2C[C@H](N=C12)c1ccccc1	Tr	1
Lorazepam	1	Clc1ccccc1C1=N[C@H](O)C(=O)Nc2c1cc(Cl)cc2	Tr	1
Methimazole	1	S=C1NC=CN1C	Tr	1
Metronidazole	1	OCCn1c(ncc1[N+](=O)[O-])C	Tr	1
Naltrexone	1	O1[C@@H]2[C@@]34CCN([C@@H](Cc5c3c1c(O)cc5)[C@]4(O)CCC2=O)CC1CC1	Tr	1
Nicardipine	1	O(C(=O)c1c(C2C=C(NC(=C2)C)C)c(C(OC)=O)c(cc1[N+](=O)[O-])C)CCN(Cc1ccccc1)C	Tr	1
Nitrazepam	1	O=C1Nc2c(cc([N+](=O)[O-])cc2)C(=NC1)c1ccccc1	Tr	1
Nitrofurantoin	1	o1c(ccc1[N+](=O)[O-])\C=N\N1CC(=O)NC1=O	Tr	1
Oxprenolol	1	O(CC=C)c1ccccc1OC[C@H](O)CNC(C)C	Tr	1
Pentoxifylline	1	O=C1N(CCCCC(=O)C)C(=O)N(c2ncn(c12)C)C	Tr	1
Phenprocoumon	1	O1c2c(cccc2)C(O)=C([C@H](CC)c2ccccc2)C1=O	Tr	1
Phenylpropanolamine	1	O[C@H]([C@H](N)C)c1ccccc1	Tr	1
Practolol	1	O(C[C@@H](O)CNC(C)C)c1ccc(NC(=O)C)cc1	Tr	1
Promethazine	1	S1c2c(N(c3c1cccc3)C[C@H](N(C)C)C)cccc2	Tr	1
Propranolol	1	O(C[C@@H](O)CNC(C)C)c1c2c(ccc1)cccc2	Tr	1
Protriptyline	1	N(CCCC1c2c(C=Cc3c1cccc3)cccc2)C	Tr	1
Ritodrine	1	Oc1ccc(cc1)CCN[C@H]([C@@H](O)c1ccc(O)cc1)C	Tr	1
Sotalol	1	S(=O)(=O)(Nc1ccc(cc1)[C@@H](O)CNC(C)C)C	Tr	1
Sulfamethazine	1	S(=O)(=O)(Nc1nc(cc(n1)C)C)c1ccc(N)cc1	Tr	1
Sulfisoxazole	1	S(=O)(=O)(Nc1onc(C)c1C)c1ccc(N)cc1	Tr	1
Temazepam	1	Clc1cc2c(N(C)C(=O)[C@@H](O)N=C2c2ccccc2)cc1	Tr	1
Timolol	1	s1nc(N2CCOCC2)c(OC[C@H](O)CNC(C)(C)C)n1	Tr	1
Tramadol	1	O(C)c1cc(ccc1)[C@@]1(O)CCCC[C@@H]1CN(C)C	Tr	1
Tropisetron	1	O(C(=O)c1c2c([nH]c1)cccc2)C1C[C@@H]2N([C@H](C1)CC2)C	Tr	1
Venlafaxine	1	O(C)c1ccc(cc1)[C@H](CN(C)C)C1([O-])CCCCC1	Tr	1
amfebutamone hydrochloride	1	Clc1cc(ccc1)C(=O)C(NC(C)(C)C)C	Tr	1
amlodipine	1	Clc1ccccc1C1C(C(OCC)=O)=C(NC(C)=C1C(OC)=O)COCCN	Tr	1
cefprozil	1	S1[C@H]2N(C(C(O)=O)=C(C1)\C=C\C)C(=O)[C@H]2NC(=O)[C@H](N)c1ccc(O)cc1	Tr	1
cinolazepam	1	Clc1cc2c(N(CCC#N)C(=O)C(O)N=C2c2ccccc2F)cc1	Tr	1
cloral betaine	0	O=C([O-])C[N+](C)(C)C	Tr	0
cortisone-acetate	1	OC1(CCC2C3C(C4(C(=CC(=O)CC4)CC3)C)C(=O)CC12C)C(=O)COC(=O)C	Tr	1
diprophylline	1	O=C1N(C)C(=O)N(c2ncn(c12)CC(O)CO)C	Tr	1
dosulepin hydrochloride	1	S1Cc2c(cccc2)C(c2c1cccc2)=CCCN(C)C	Tr	1
encainide	1	O(C)c1ccc(cc1)C(=O)Nc1ccccc1CCC1N(CCCC1)C	Tr	1
gitoxin	1	O1CC(=CC1=O)[C@@H]1[C@]2(CC[C@H]3[C@@H](CC[C@@H]4C[C@@H](O[C@@H]5O[C@H](C)[C@@H](O[C@@H]6O[C@H](C)[C@@H](O[C@@H]7O[C@H](C)[C@@H](O)[C@@H](O)C7)[C@@H](O)C6)[C@@H](O)C5)CC[C@]34C)[C@@]2(O)C[C@@H]1O)C	Tr	1
glibenclamide	1	Clc1cc(C(=O)NCCc2ccc(S(=O)(=O)NC(=O)NC3CCCCC3)cc2)c(OC)cc1	Tr	1
idazoxan	0	O1c2c(OCC1C=1NCCN=1)cccc2	Tr	1
liothyronine	1	Ic1cc(cc(I)c1Oc1cc(I)c(O)cc1)CC(N)C(O)=O	Tr	1
phencyclidine	1	N1(CCCCC1)C1(CCCCC1)c1ccccc1	Tr	1
pirmenol	0	OC(CCCN1C(CCCC1C)C)(c1ccccc1)c1ncccc1	Tr	1
ruxolitinib	1	[nH]1c2ncnc(c2cc1)-c1cn(nc1)[C@H](CC#N)C1CCCC1	Tr	1
Bumetanide	1	S(=O)(=O)(N)c1cc(cc(NCCCC)c1Oc1ccccc1)C(O)=O	Tr	1
Capecitabine	1	FC1=CN([C@@H]2O[C@H](C)[C@@H](O)[C@H]2O)C(=O)N=C1NC(OCCCCC)=O	Tr	1
Clofibrate	1	Clc1ccc(OC(C(OCC)=O)(C)C)cc1	Tr	1
Gatifloxacin	1	Fc1cc2c(N(C=C(C(O)=O)C2=O)C2CC2)c(OC)c1N1C[C@H](NCC1)C	Tr	1
Metoprolol	1	O(C[C@@H](O)CNC(C)C)c1ccc(cc1)CCOC	Tr	1
Minoxidil	1	[O-][n+]1c(N)cc(nc1N)N1CCCCC1	Tr	1
Praziquantel	1	O=C1N2[C@H](c3c(CC2)cccc3)CN(C1)C(=O)C1CCCCC1	Tr	1
Progesterone	1	O=C1CC[C@@]2([C@@H]3[C@H]([C@@H]4CC[C@H](C(=O)C)[C@]4(CC3)C)CCC2=C1)C	Tr	1
Torsemide	1	S(=O)(=O)(NC(=O)NC(C)C)c1cnccc1Nc1cc(ccc1)C	Tr	1
Trapidil	1	n12ncnc1N=C(C=C2N(CC)CC)C	Tr	1
ethosuximide	1	O=C1NC(=O)CC1(CC)C	Tr	1
posaconazole	1	Fc1cc(F)ccc1C1(OCC(C1)COc1ccc(N2CCN(CC2)c2ccc(N3C=NN(C(C(O)C)CC)C3=O)cc2)cc1)Cn1ncnc1	Tr	1
torasemide	1	S(=O)(=O)(NC(=O)NC(C)C)c1cnccc1Nc1cc(ccc1)C	Tr	1
voriconazole	1	Fc1cc(F)ccc1[C@](O)([C@@H](C)c1ncncc1F)Cn1ncnc1	Tr	1
mycophenolate_mofetil	1	O1Cc2c(c(O)c(C\C=C(\CCC(OCCN3CCOCC3)=O)/C)c(OC)c2C)C1=O	Tr	1
Gallopamil	0	O(C)c1c(OC)cc(cc1OC)[C@@](C(C)C)(CCCN(CCc1cc(OC)c(OC)cc1)C)C#N	Tr	1
Gliclazide	1	S(=O)(=O)(NC(=O)NN1C[C@@H]2[C@H](CCC2)C1)c1ccc(cc1)C	Tr	1
Risperidone	1	Fc1cc2onc(c2cc1)C1CCN(CC1)CCC=1C(=O)N2C(=NC=1C)CCCC2	Tr	1
Trimethoprim	1	O(C)c1c(OC)cc(cc1OC)Cc1cnc(nc1N)N	Tr	1
celecoxib	1	S(=O)(=O)(N)c1ccc(-n2nc(cc2-c2ccc(cc2)C)C(F)(F)F)cc1	Tr	1
oxandrolone	1	O1C[C@]2([C@H](CC1=O)CC[C@H]1[C@@H]3CC[C@@](O)(C)[C@]3(CC[C@@H]12)C)C	Tr	1
treosulfan	0	S(OCC(O)C(O)COS(=O)(=O)C)(=O)(=O)C	Tr	1
verapamil	1	O(C)c1cc(ccc1OC)C(C(C)C)(CCCN(CCc1cc(OC)c(OC)cc1)C)C#N	Tr	1
warfarin	1	O1c2c(cccc2)C(O)=C(C(CC(=O)C)c2ccccc2)C1=O	Tr	1
Antipyrine	1	O=C1N(N(C)C(=C1)C)c1ccccc1	Tr	1
Chlorpromazine	1	Clc1cc2N(c3c(Sc2cc1)cccc3)CCCN(C)C	Tr	1
Cisapride	1	Clc1cc(C(=O)N[C@@H]2CCN(C[C@@H]2OC)CCCOc2ccc(F)cc2)c(OC)cc1N	Tr	1
Delmopinol	0	O1C[C@@H](N(CC1)CCO)CCCC(CCC)CCC	Tr	1
Desipramine	1	N(CCCN1c2c(CCc3c1cccc3)cccc2)C	Tr	1
Glibornuride	1	S(=O)(=O)(NC(=O)N[C@@H]1[C@@H]2CC[C@](C)([C@@H]1O)C2(C)C)c1ccc(cc1)C	Tr	1
Glyburide	1	Clc1cc(C(=O)NCCc2ccc(S(=O)(=O)NC(=O)NC3CCCCC3)cc2)c(OC)cc1	Tr	1
Ibuprofen	1	OC(=O)[C@H](C)c1ccc(cc1)CC(C)C	Tr	1
Imatinib	1	O=C(Nc1cc(Nc2nc(ccn2)-c2cccnc2)c(cc1)C)c1ccc(cc1)CN1CCNCC1	Tr	1
Imipramine	1	N(CCCN1c2c(CCc3c1cccc3)cccc2)(C)C	Tr	1
Isoxepac	0	O1Cc2c(cccc2)C(=O)c2cc(ccc12)CC(O)=O	Tr	1
Lacidipine	1	O(C(=O)C=1C(C(C(OCC)=O)=C(NC=1C)C)c1ccccc1\C=C\C(OC(C)(C)C)=O)CC	Tr	1
Lamotrigine	1	Clc1c(cccc1Cl)-c1nnc(nc1N)N	Tr	1
Lidocaine	1	O=C(Nc1c(cccc1C)C)CN(CC)CC	Tr	1
Maprotiline	1	N(CCCC12CCC(c3c1cccc3)c1c2cccc1)C	Tr	1
Mexiletine	1	O(C[C@H](N)C)c1c(cccc1C)C	Tr	1
Nefopam	0	O1CCN(Cc2c(cccc2)[C@@H]1c1ccccc1)C	Tr	1
Oxaprozin	1	o1c(c(nc1CCC(O)=O)-c1ccccc1)-c1ccccc1	Tr	1
Pelrinone	0	O=C1NC(=NC(NCc2cccnc2)=C1C#N)C	Tr	1
Phenylbutazone	1	O=C1N(N(C(=O)C1CCCC)c1ccccc1)c1ccccc1	Tr	1
Ropinirole	1	O=C1Nc2c(C1)c(ccc2)CCN(CCC)CCC	Tr	1
Tolmesoxide	0	S(=O)(C)c1cc(OC)c(OC)cc1C	Tr	1
Valproic_acid	1	OC(=O)C(CCC)CCC	Tr	1
Ximoprofen	0	OC(=O)[C@@H](C)c1ccc(cc1)[C@@H]1C\C(=N/O)\CCC1	Tr	1
Zopiclone	1	Clc1ccc(nc1)N1[C@H](OC(=O)N2CCN(CC2)C)c2nccnc2C1=O	Tr	1
Caffeine	1	O=C1N(C)C(=O)N(c2ncn(c12)C)C	Tr	1
Desmethyldiazepam	0	Clc1cc2c(NC(=O)CN=C2c2ccccc2)cc1	Tr	1
Diazepam	1	Clc1cc2c(N(C)C(=O)CN=C2c2ccccc2)cc1	Tr	1
Fluorescein	1	O1C2(c3c(cccc3)C1=O)c1c(Oc3c2ccc(O)c3)cc(O)cc1	Tr	1
Lomefloxacin	1	Fc1c2N(C=C(C(O)=O)C(=O)c2cc(F)c1N1C[C@@H](NCC1)C)CC	Tr	1
Miconazole	1	Clc1cc(Cl)ccc1CO[C@H](Cn1ccnc1)c1ccc(Cl)cc1Cl	Tr	1
Naproxen	1	O(C)c1cc2c(cc(cc2)[C@@H](C(O)=O)C)cc1	Tr	1
Pheniramine	1	n1ccccc1[C@H](CCN(C)C)c1ccccc1	Tr	1
Tianeptine	1	Clc1cc2S(=O)(=O)N(c3c(N(c2cc1)CCCCCCC(O)=O)cccc3)C	Tr	1
carfecillin	1	S1[C@H]2N([C@@H](C(O)=O)C1(C)C)C(=O)[C@H]2NC(=O)C(C(Oc1ccccc1)=O)c1ccccc1	Tr	1
Acetanilide	1	O=C(Nc1ccccc1)C	Tr	1
Acetazolamide	1	s1c(nnc1S(=O)(=O)N)NC(=O)C	Tr	1
Alfacalcidol	1	O[C@H]1C[C@H](O)C\C(=C/C=C\2/[C@@H]3CC[C@H]([C@@H](CCCC(C)C)C)[C@]3(CCC/2)C)\C1=C	Tr	1
Aminoglutethimide	1	O=C1NC(=O)CC[C@]1(CC)c1ccc(N)cc1	Tr	1
Aminopyrine	1	O=C1N(N(C)C(C)=C1N(C)C)c1ccccc1	Tr	1
Anastrozole	1	n1cn(nc1)Cc1cc(cc(c1)C(C#N)(C)C)C(C#N)(C)C	Tr	1
Astemizole	1	Fc1ccc(cc1)Cn1c2c(nc1NC1CCN(CC1)CCc1ccc(OC)cc1)cccc2	Tr	1
Azelastine	1	Clc1ccc(cc1)C[C@H]1NN([C@@H]2CCCN(CC2)C)C(=O)c2c1cccc2	Tr	1
Azimilide	1	Clc1ccc(cc1)-c1oc(cc1)\C=N\N1CC(=O)N(CCCCN2CCN(CC2)C)C1=O	Tr	1
Bendroflumethiazide	1	S(=O)(=O)(N)c1cc2S(=O)(=O)N[C@@H](Nc2cc1C(F)(F)F)Cc1ccccc1	Tr	1
Benorylate	1	O(C(=O)C)c1ccccc1C(Oc1ccc(NC(=O)C)cc1)=O	Tr	1
Bepridil	1	O(CC(C)C)C[C@@H](N(Cc1ccccc1)c1ccccc1)CN1CCCC1	Tr	1
Betahistine	1	n1ccccc1CCNC	Tr	1
Bezafibrate	1	Clc1ccc(cc1)C(=O)NCCc1ccc(OC(C(O)=O)(C)C)cc1	Tr	1
Biperiden	1	O[C@](CCN1CCCCC1)([C@H]1[C@@H]2C=C[C@H](C1)C2)c1ccccc1	Tr	1
Budesonide	1	O1[C@]2([C@@H](O[C@@H]1CCC)C[C@H]1[C@H]3[C@@H]([C@@]4(C(=CC(=O)C=C4)CC3)C)[C@H](O)C[C@@]12C)C(=O)CO	Tr	1
Buspirone	1	O=C1N(CCCCN2CCN(CC2)c2ncccn2)C(=O)CC2(C1)CCCC2	Tr	1
Camazepam	1	Clc1cc2c(N(C)C(=O)[C@@H](OC(=O)N(C)C)N=C2c2ccccc2)cc1	Tr	1
Carmustine	1	ClCCN(N=O)C(=O)NCCCl	Tr	1
Chloral_hydrate	1	ClC(Cl)(Cl)C(O)O	Tr	1
Chlorambucil	1	ClCCN(CCCl)c1ccc(cc1)CCCC(O)=O	Tr	1
Chloroquine	1	Clc1cc2nccc(N[C@H](CCCN(CC)CC)C)c2cc1	Tr	1
Chlorphenesin	1	Clc1ccc(OC[C@@H](O)CO)cc1	Tr	1
Cilomilast	1	O(c1cc(ccc1OC)C1(CCC(CC1)C(O)=O)C#N)C1CCCC1	Tr	1
Cinchonine	0	O[C@H]([C@@H]1N2C[C@@H]([C@H](C1)CC2)C=C)c1c2c(ncc1)cccc2	Tr	1
Citalopram	1	Fc1ccc(cc1)[C@@]1(OCc2cc(ccc12)C#N)CCCN(C)C	Tr	1
Corticosterone	0	O=C1CC[C@@]2([C@@H]3[C@H]([C@@H]4CC[C@H](C(=O)CO)[C@]4(C[C@H]3O)C)CCC2=C1)C	Tr	1
Cyclopenthiazide	0	Clc1cc2N[C@H](NS(=O)(=O)c2cc1S(=O)(=O)N)CC1CCCC1	Tr	1
Diacetylmorphine	1	O1[C@@H]2[C@]34[C@H]([C@H](N(CCC3)C)Cc3c4c1c(OC(=O)C)cc3)C=C[C@@H]2OC(=O)C	Tr	1
Dicyclomine	1	O(C(=O)C1(CCCCC1)C1CCCCC1)CCN(CC)CC	Tr	1
Dofetilide	1	S(=O)(=O)(Nc1ccc(cc1)CCN(CCOc1ccc(NS(=O)(=O)C)cc1)C)C	Tr	1
Doxazosin	1	O1c2c(OC[C@H]1C(=O)N1CCN(CC1)c1nc(N)c3cc(OC)c(OC)cc3n1)cccc2	Tr	1
Doxepin	1	O1Cc2c(cccc2)\C(\c2c1cccc2)=C\CCN(C)C	Tr	1
Ethyl_alcohol	1	OCC	Tr	1
Ethynodiol_diacetate	1	O(C(=O)C)[C@]1(CC[C@H]2[C@H]3[C@@H]([C@@H]4C(=C[C@@H](OC(=O)C)CC4)CC3)CC[C@]12C)C#C	Tr	1
Etoricoxib	1	Clc1cc(c(nc1)-c1ccc(nc1)C)-c1ccc(S(=O)(=O)C)cc1	Tr	1
Finasteride	1	O=C1N[C@@H]2CC[C@H]3[C@@H]4CC[C@H](C(=O)NC(C)(C)C)[C@]4(CC[C@@H]3[C@]2(C=C1)C)C	Tr	1
Flucytosine	1	Fc1cnc(O)nc1N	Tr	1
Flurazepam	1	Clc1cc2c(N(CCN(CC)CC)C(=O)CN=C2c2ccccc2F)cc1	Tr	1
Fluvastatin	1	Fc1ccc(cc1)-c1c2c(n(C(C)C)c1\C=C\[C@@H](O)C[C@@H](O)CC(O)=O)cccc2	Tr	1
Gemfibrozil	1	O(CCCC(C(O)=O)(C)C)c1cc(ccc1C)C	Tr	1
Genaconazole	0	S(=O)(=O)([C@@H]([C@@](O)(Cn1ncnc1)c1ccc(F)cc1F)C)C	Tr	1
Gestodene	1	O=C1CC[C@@H]2[C@H]3[C@H]([C@@H]4C=C[C@](O)(C#C)[C@@]4(CC3)CC)CCC2=C1	Tr	1
Glimepiride	1	S(=O)(=O)(NC(=O)NC1CCC(CC1)C)c1ccc(cc1)CCNC(=O)N1CC(C)=C(CC)C1=O	Tr	1
Glycine	1	OC(=O)CN	Tr	1
Granisetron	1	O=C(NC1C[C@@H]2N([C@H](C1)CCC2)C)c1nn(c2c1cccc2)C	Tr	1
Guanfacine	1	Clc1cccc(Cl)c1CC(=O)NC(N)=N	Tr	1
Haloperidol	1	Clc1ccc(cc1)C1(O)CCN(CC1)CCCC(=O)c1ccc(F)cc1	Tr	1
Hydralazine	1	n1ncc2c(cccc2)c1NN	Tr	1
Indobufen	1	O=C1N(Cc2c1cccc2)c1ccc(cc1)[C@@H](CC)C(O)=O	Tr	1
Indomethacin	1	Clc1ccc(cc1)C(=O)n1c2c(cc(OC)cc2)c(CC(O)=O)c1C	Tr	1
Indoprofen	1	O=C1N(Cc2c1cccc2)c1ccc(cc1)[C@@H](C(O)=O)C	Tr	1
Irbesartan	1	O=C1N(Cc2ccc(cc2)-c2ccccc2-c2nn[nH]n2)C(=NC12CCCC2)CCCC	Tr	1
Isosorbide-2-mononitrate	1	O1[C@H]2[C@H](OC[C@@H]2O)[C@@H](O[N+](=O)[O-])C1	Tr	1
Isoxicam	1	S1(=O)(=O)N(C)C(C(=O)Nc2noc(c2)C)=C(O)c2c1cccc2	Tr	1
Ketanserin	0	Fc1ccc(cc1)C(=O)C1CCN(CC1)CCN1C(=O)c2c(NC1=O)cccc2	Tr	1
Ketazolam	1	Clc1cc2c(N(C)C(=O)CN3[C@@]2(OC(=CC3=O)C)c2ccccc2)cc1	Tr	1
Levetiracetam	1	O=C1N(CCC1)[C@H](CC)C(=O)N	Tr	1
Levonorgestrel	1	O=C1CC[C@@H]2[C@@H]3[C@H]([C@@H]4CC[C@@](O)(C#C)[C@]4(CC3)CC)CCC2=C1	Tr	1
Linezolid	1	Fc1cc(N2C[C@@H](OC2=O)CNC(=O)C)ccc1N1CCOCC1	Tr	1
Lisuride	1	O=C(N[C@H]1C=C2[C@H](N(C1)C)Cc1c3c2cccc3[nH]c1)N(CC)CC	Tr	1
Lynestrenol	1	O[C@]1(CC[C@H]2[C@H]3[C@@H]([C@@H]4C(CC3)=CCCC4)CC[C@]12C)C#C	Tr	1
Mebendazole	1	O(C(=O)Nc1[nH]c2cc(ccc2n1)C(=O)c1ccccc1)C	Tr	1
Meclofenamic_acid	1	Clc1c(Nc2ccccc2C(O)=O)c(Cl)ccc1C	Tr	1
Meptazinol	1	Oc1cc(ccc1)[C@]1(CCCCN(C1)C)CC	Tr	1
Methocarbamol	1	O(C[C@@H](O)COC(=O)N)c1ccccc1OC	Tr	1
Methsuximide	1	O=C1N(C)C(=O)C[C@@]1(C)c1ccccc1	Tr	1
Methylergonovine	1	OC[C@@H](NC(=O)[C@@H]1C=C2[C@H](N(C1)C)Cc1c3c2cccc3[nH]c1)CC	Tr	1
Methysergide	1	OC[C@@H](NC(=O)[C@@H]1C=C2[C@H](N(C1)C)Cc1c3c2cccc3n(c1)C)CC	Tr	1
Nafronyl	0	O1CCC[C@@H]1C[C@@H](Cc1cc2c(cc1)cccc2)C(OCCN(CC)CC)=O	Tr	1
Nalbuphine	1	O1[C@H]2[C@@]34CCN([C@@H](Cc5c3c1c(O)cc5)[C@]4(O)CC[C@@H]2O)CC1CCC1	Tr	1
Nefazodone	1	Clc1cc(N2CCN(CC2)CCCN2N=C(N(CCOc3ccccc3)C2=O)CC)ccc1	Tr	1
Nicotine	1	n1cc(ccc1)[C@@H]1N(CCC1)C	Tr	1
Nilutamide	1	FC(F)(F)c1cc(N2C(=O)C(NC2=O)(C)C)ccc1[N+](=O)[O-]	Tr	1
Nilvadipine	1	O(C(=O)C=1[C@H](C(C(OC)=O)=C(NC=1C)C#N)c1cc([N+](=O)[O-])ccc1)C(C)C	Tr	1
Nitroxoline	1	Oc1c2ncccc2c([N+](=O)[O-])cc1	Tr	1
Norethindrone	1	O=C1CC[C@@H]2[C@@H]3[C@H]([C@@H]4CC[C@@](O)(C#C)[C@]4(CC3)C)CCC2=C1	Tr	1
Norgestimate	1	O(C(=O)C)[C@]1(CC[C@H]2[C@H]3[C@@H]([C@@H]4C(=C/C(=N/O)/CC4)CC3)CC[C@]12CC)C#C	Tr	1
Norgestrel	1	O=C1CC[C@@H]2[C@@H]3[C@H]([C@H]4CC[C@@](O)(C#C)[C@]4(C=C3)CC)CCC2=C1	Tr	1
Nortriptyline	1	N(CCC=C1c2c(CCc3c1cccc3)cccc2)C	Tr	1
Ofloxacin	1	Fc1cc2c3N(C=C(C(O)=O)C2=O)[C@@H](COc3c1N1CCN(CC1)C)C	Tr	1
Ondansetron	1	O=C1c2c(n(c3c2cccc3)C)CC[C@H]1Cn1ccnc1C	Tr	1
Orphenadrine	1	O([C@H](c1ccccc1C)c1ccccc1)CCN(C)C	Tr	1
Oxatomide	0	O=C1Nc2c(N1CCCN1CCN(CC1)C(c1ccccc1)c1ccccc1)cccc2	Tr	1
Oxcarbazepine	1	O=C1Cc2c(N(c3c1cccc3)C(=O)N)cccc2	Tr	1
Oxybutynin	1	O(CC#CCN(CC)CC)C(=O)[C@](O)(C1CCCCC1)c1ccccc1	Tr	1
Oxyphenbutazone	1	Oc1ccc(N2N(C(=O)[C@H](CCCC)C2=O)c2ccccc2)cc1	Tr	1
Paroxetine	1	Fc1ccc(cc1)[C@@H]1CCNC[C@H]1COc1cc2OCOc2cc1	Tr	1
Pentobarbital	1	O=C1NC(=O)NC(=O)C1([C@@H](CCC)C)CC	Tr	1
Perphenazine	1	Clc1cc2N(c3c(Sc2cc1)cccc3)CCCN1CCN(CC1)CCO	Tr	1
Phenglutarimide	0	O=C1NC(=O)CC[C@@]1(CCN(CC)CC)c1ccccc1	Tr	1
Phenobarbital	1	O=C1NC(=O)NC(=O)C1(CC)c1ccccc1	Tr	1
Piroxicam	1	S1(=O)(=O)N(C)C(C(=O)Nc2ncccc2)=C(O)c2c1cccc2	Tr	1
Polythiazide	1	Clc1cc2N[C@H](N(S(=O)(=O)c2cc1S(=O)(=O)N)C)CSCC(F)(F)F	Tr	1
Probenecid	1	S(=O)(=O)(N(CCC)CCC)c1ccc(cc1)C(O)=O	Tr	1
Procyclidine	1	O[C@@](CCN1CCCC1)(C1CCCCC1)c1ccccc1	Tr	1
Propofol	1	Oc1c(cccc1C(C)C)C(C)C	Tr	1
Proxyphylline	0	O=C1N(C)C(=O)N(c2ncn(c12)C[C@@H](O)C)C	Tr	1
Pseudoephedrine	1	O[C@H]([C@@H](NC)C)c1ccccc1	Tr	1
Pyrazinamide	1	O=C(N)c1nccnc1	Tr	1
Quinagolide	1	S(=O)(=O)(N[C@@H]1C[C@H]2[C@@H](N(C1)CCC)Cc1c(C2)c(O)ccc1)N(CC)CC	Tr	1
Remoxipride	1	Brc1ccc(OC)c(C(=O)NC[C@H]2N(CCC2)CC)c1OC	Tr	1
Repaglinide	1	O(CC)c1cc(ccc1C(O)=O)CC(=O)N[C@@H](CC(C)C)c1ccccc1N1CCCCC1	Tr	1
Salsalate	1	O(C(=O)c1ccccc1O)c1ccccc1C(O)=O	Tr	1
Stavudine	1	O1[C@@H](C=C[C@@H]1N1C=C(C)C(=O)NC1=O)CO	Tr	1
Sudoxicam	0	s1ccnc1NC(=O)C=1N(S(=O)(=O)c2c(cccc2)C=1O)C	Tr	1
Sulfamethoxazole	1	S(=O)(=O)(Nc1noc(c1)C)c1ccc(N)cc1	Tr	1
Sulfinpyrazone	1	S(=O)(CCC1C(=O)N(N(C1=O)c1ccccc1)c1ccccc1)c1ccccc1	Tr	1
Tamoxifen	1	O(CCN(C)C)c1ccc(cc1)\C(=C(\CC)/c1ccccc1)\c1ccccc1	Tr	1
Tamsulosin	1	S(=O)(=O)(N)c1cc(ccc1OC)C[C@H](NCCOc1ccccc1OCC)C	Tr	1
Tenoxicam	1	s1c2c(S(=O)(=O)N(C)C(C(=O)Nc3ncccc3)=C2O)cc1	Tr	1
Tesaglitazar	0	S(Oc1ccc(cc1)CCOc1ccc(cc1)C[C@H](OCC)C(O)=O)(=O)(=O)C	Tr	1
Testosterone	1	O=C1CC[C@@]2([C@@H]3[C@H]([C@@H]4CC[C@H](O)[C@]4(CC3)C)CCC2=C1)C	Tr	1
Tetrabenazine	1	O(C)c1cc2CCN3[C@@H](CC(=O)[C@H](C3)CC(C)C)c2cc1OC	Tr	1
Tilidine	1	O=C(CCC)[C@]1(CCC=C[C@@H]1N(C)C)c1ccccc1	Tr	1
Tinidazole	1	S(=O)(=O)(CCn1c(ncc1[N+](=O)[O-])C)CC	Tr	1
Tocainide	1	O=C(N(CC)CC)c1cccnc1	Tr	1
Toremifene	1	ClCC\C(=C(\c1ccc(OCCN(C)C)cc1)/c1ccccc1)\c1ccccc1	Tr	1
Trazodone	1	Clc1cc(N2CCN(CC2)CCC[N+]2=Nc3[n+](cccc3)C2=O)ccc1	Tr	1
Triamcinolone	1	F[C@@]12[C@H]([C@@H]3C[C@@H](O)[C@](O)(C(=O)CO)[C@]3(C[C@@H]1O)C)CCC1=CC(=O)C=C[C@@]12C	Tr	1
Trifluoperazine	1	S1c2c(N(c3c1cccc3)CCCN1CCN(CC1)C)cc(cc2)C(F)(F)F	Tr	1
Trihexyphenidyl	1	O[C@@](CCN1CCCCC1)(C1CCCCC1)c1ccccc1	Tr	1
Trofosfamide	0	ClCCN1P(OCCC1)(=O)N(CCCl)CCCl	Tr	1
Zaleplon	1	O=C(N(CC)c1cc(ccc1)C=1n2ncc(c2N=CC=1)C#N)C	Tr	1
Zileuton	1	s1c2c(cc1[C@@H](N(O)C(=O)N)C)cccc2	Tr	1
Zomepirac	1	Clc1ccc(cc1)C(=O)c1n(C)c(cc1C)CC(O)=O	Tr	1
Zonisamide	1	S(=O)(=O)(N)Cc1noc2c1cccc2	Tr	1
Zotepine	1	Clc1cc2c(Sc3c(C=C2OCCN(C)C)cccc3)cc1	Tr	1
adinazolam	1	Clc1cc2c(-n3c(nnc3CN(C)C)CN=C2c2ccccc2)cc1	Tr	1
alfentanil	1	O=C1N(N=NN1CC)CCN1CCC(N(C(=O)CC)c2ccccc2)(CC1)COC	Tr	1
alizapride	1	O(C)c1cc2[nH]nnc2cc1C(=O)NCC1N(CCC1)CC=C	Tr	1
alogliptin	1	O=C1N(C)C(=O)N(Cc2ccccc2C#N)C(N2C[C@H](N)CCC2)=C1	Tr	1
amifostine	1	S(P(O)(O)=O)CCNCCCN	Tr	1
atomoxetine	1	O([C@H](CCNC)c1ccccc1)c1ccccc1C	Tr	1
betazole	1	[nH]1nccc1CCN	Tr	1
bromfenac	1	Brc1ccc(cc1)C(=O)c1cccc(CC(O)=O)c1N	Tr	1
calcitriol	1	OC1CC(O)CC(=CC=C2C3CCC(C(CCCC(O)(C)C)C)C3(CCC2)C)C1=C	Tr	1
cephalexin	1	S1[C@H]2N(C(C(O)=O)=C(C1)C)C(=O)[C@H]2NC(=O)[C@H](N)c1ccccc1	Tr	1
cetirizine hydrochloride	1	Clc1ccc(cc1)C(N1CCN(CC1)CCOCC(O)=O)c1ccccc1	Tr	1
chlormezanone	1	Clc1ccc(cc1)C1S(=O)(=O)CCC(=O)N1C	Tr	1
chloroform	1	ClC(Cl)Cl	Tr	1
cibenzoline	0	N1CCN=C1C1CC1(c1ccccc1)c1ccccc1	Tr	1
clarithromycin	1	O1C(CC)C(O)(C)C(O)C(C)C(=O)C(CC(OC)(C)C(OC2OC(CC(N(C)C)C2O)C)C(C)C(OC2OC(C)C(O)C(OC)(C2)C)C(C)C1=O)C	Tr	1
clopamide	0	Clc1ccc(cc1S(=O)(=O)N)C(=O)NN1C(CCCC1C)C	Tr	1
conivaptan	1	O=C(N1CCc2[nH]c(nc2-c2c1cccc2)C)c1ccc(NC(=O)c2ccccc2-c2ccccc2)cc1	Tr	1
cyclobenzaprine	1	N(CCC=C1c2c(C=Cc3c1cccc3)cccc2)(C)C	Tr	1
dalfampridine	1	n1ccc(N)cc1	Tr	1
doxapram	1	O1CCN(CC1)CCC1CN(CC)C(=O)C1(c1ccccc1)c1ccccc1	Tr	1
doxycycline	1	OC1=C2[C@@H]([C@H](c3c1c(O)ccc3)C)[C@H](O)[C@@H]1[C@@](O)(C(=O)\C(=C(/O)\N)\C(=O)[C@H]1N(C)C)C2=O	Tr	1
drotaverine	1	O(CC)c1cc(ccc1OCC)\C=C\1/NCCc2cc(OCC)c(OCC)cc/12	Tr	1
entecavir	1	O=C1NC(=Nc2n(cnc12)[C@H]1C[C@H](O)[C@@H](CO)C1=C)N	Tr	1
ephedrine	1	OC(C(NC)C)c1ccccc1	Tr	1
ethynylestradiol	1	Oc1cc2CC[C@H]3[C@@H]4CC[C@@](O)(C#C)[C@]4(CC[C@@H]3c2cc1)C	Tr	1
etilefrine	1	Oc1cc(ccc1)C(O)CNCC	Tr	1
flupirtine	1	Fc1ccc(cc1)CNc1nc(N)c(NC(OCC)=O)cc1	Tr	1
fomepizole	1	[nH]1ncc(c1)C	Tr	1
glucose	1	O1C(CO)C(O)C(O)C(O)C1O	Tr	1
hydroxyurea	1	O=C(NO)N	Tr	1
ifosfamide	1	ClCCN1P(OCCC1)(=O)NCCCl	Tr	1
indecainide	1	O=C(N)C1(c2c(-c3c1cccc3)cccc2)CCCNC(C)C	Tr	1
lacosamide	1	O(C[C@@H](NC(=O)C)C(=O)NCc1ccccc1)C	Tr	1
levoprotiline	0	O[C@H](CC12CCC(c3c1cccc3)c1c2cccc1)CNC	Tr	1
lomustine	1	ClCCN(N=O)C(=O)NC1CCCCC1	Tr	1
loxiglumide	1	Clc1cc(ccc1Cl)C(=O)NC(CCC(O)=O)C(=O)N(CCCCC)CCCOC	Tr	1
miglitol	1	O[C@H]1[C@H](O)[C@@H](O)CN(CCO)[C@@H]1CO	Tr	1
miglustat	1	O[C@H]1[C@H](O)[C@@H](O)CN(CCCC)[C@@H]1CO	Tr	1
minocycline	1	OC=1[C@@H](N(C)C)[C@@H]2C[C@H]3C(=C(O)[C@]2(O)C(=O)C=1C(=O)N)C(=O)c1c(C3)c(N(C)C)ccc1O	Tr	1
molsidomine	1	O1[N-][N+](N2CCOCC2)=CC1=NC(OCC)=O	Tr	1
nevirapine	1	O=C1Nc2c(nccc2C)N(c2ncccc12)C1CC1	Tr	1
nimodipine	1	O(C(=O)C=1C(C(C(OCCOC)=O)=C(NC=1C)C)c1cc([N+](=O)[O-])ccc1)C(C)C	Tr	1
n-methyl-2-pyridineethanamine	0	[NH2+](CCc1ncccc1)C	Tr	1
nomifensine	1	Nc1c2c(ccc1)C(CN(C2)C)c1ccccc1	Tr	1
noscapine	0	O1[C@@H](c2c(c(OC)c(OC)cc2)C1=O)[C@@H]1N(CCc2c1c(OC)c1OCOc1c2)C	Tr	1
oxtriphylline	1	O=C1N(C)C([O-])=C2N=CN=C2N1C	Tr	1
phe-l-pro	0	OC(=O)[C@H]1N(CCC1)C(=O)[C@H](N)Cc1ccccc1	Tr	1
phenacemide	1	O=C(NC(=O)N)Cc1ccccc1	Tr	1
phensuximide	1	O=C1N(C)C(=O)CC1c1ccccc1	Tr	1
pyrimethamine	1	Clc1ccc(cc1)-c1c(nc(nc1N)N)CC	Tr	1
reboxetine	1	O1CCNC[C@@H]1[C@H](Oc1ccccc1OCC)c1ccccc1	Tr	1
rosiglitazone	1	S1C(Cc2ccc(OCCN(C)c3ncccc3)cc2)C(=O)NC1=O	Tr	1
salicylic acid	1	Oc1ccccc1C(O)=O	Tr	1
sodium valproate	1	OC(=O)C(CCC)CCC	Tr	1
solifenacin	1	O(C(=O)N1CCc2c(cccc2)[C@@H]1c1ccccc1)[C@@H]1C2CCN(C1)CC2	Tr	1
temozolomide	1	O=C1n2c(N=NN1C)c(nc2)C(=O)N	Tr	1
terodiline	0	N(C(C)(C)C)C(CC(c1ccccc1)c1ccccc1)C	Tr	1
theophyline	1	O=C1N(C)C(=O)N(c2nc[nH]c12)C	Tr	1
tizanidine	1	Clc1ccc2nsnc2c1NC=1NCCN=1	Tr	1
toluene	0	c1ccccc1C	Tr	1
ursodeoxycholic_acid	1	O[C@@H]1CC[C@]2([C@@H](C1)C[C@H](O)[C@H]1[C@@H]3CC[C@H](C(CCC(O)=O)C)[C@]3(CC[C@@H]12)C)C	Tr	1
ezetimibe	1	Fc1ccc(cc1)[C@@H](O)CC[C@@H]1[C@H](N(C1=O)c1ccc(F)cc1)c1ccc(O)cc1	Tr	1
abiraterone_acetate	1	O(C(=O)C)[C@@H]1CC2=CC[C@H]3[C@@H]4CC=C([C@]4(CC[C@@H]3[C@]2(CC1)C)C)c1cccnc1	Tr	1
ticagrelor	1	S(CCC)c1nc(N[C@@H]2C[C@H]2c2cc(F)c(F)cc2)c2nnn(c2n1)[C@@H]1C[C@H](OCCO)[C@@H](O)[C@H]1O	Tr	1
altretamine	1	n1c(nc(nc1N(C)C)N(C)C)N(C)C	Tr	1
bephenium	1	O(CC[N+](Cc1ccccc1)(C)C)c1ccccc1	Tr	0
bethanechol	1	O(C(C[N+](C)(C)C)C)C(=O)N	Tr	0
Edrophonium	1	Oc1cc([N+](CC)(C)C)ccc1	Tr	0
Gallamine	1	[I-].[I-].[I-].O(CC[N+](CC)(CC)CC)c1c(OCC[N+](CC)(CC)CC)cccc1OCC[N+](CC)(CC)CC	Tr	0
ipratropium	1	O(C(=O)C(CO)c1ccccc1)C1CC2[N+](C(C1)CC2)(C(C)C)C	Tr	0
obidoxime	0	O(C[n+]1ccc(cc1)\C=N\O)C[n+]1ccc(cc1)\C=N\O	Tr	0
pentolinium	1	[N+]1(CCCC1)(CCCCC[N+]1(CCCC1)C)C	Tr	0
poldine	0	O(CC1[N+](CCC1)(C)C)C(=O)C(O)(c1ccccc1)c1ccccc1	Tr	0
vecuronium	1	O(C(=O)C)[C@@H]1[C@@]2([C@H]([C@H]3[C@H](CC2)[C@@]2([C@H](C[C@H](OC(=O)C)[C@@H](N4CCCCC4)C2)CC3)C)C[C@@H]1[N+]1(CCCCC1)C)C	Tr	0
amdinocillin	1	S1[C@H]2N([C@@H](C(O)=O)C1(C)C)C(=O)[C@H]2\N=C\N1CCCCCC1	Tr	0
Amikacin	1	O1[C@H](CN)[C@@H](O)[C@H](O)[C@@H](O)[C@H]1O[C@H]1[C@H](O)[C@@H](O[C@H]2O[C@H](CO)[C@@H](O)[C@H](N)[C@H]2O)[C@H](NC(=O)[C@H](O)CCN)C[C@@H]1N	Te	0
Cefodizime	1	s1c(CC(O)=O)c(nc1SCC=1CS[C@H]2N(C=1C(O)=O)C(=O)[C@H]2NC(=O)\C(=N/OC)\c1nc(sc1)N)C	Te	0
Moxalactam	1	S(CC=1CO[C@H]2N(C=1C(=O)[O-])C(=O)[C@@]2(OC)NC(=O)[C@H](C(O)=O)c1ccc(O)cc1)c1nnnn1C	Te	0
Tobramycin	1	O1[C@H](CO)[C@@H](O)[C@H](N)[C@@H](O)[C@H]1O[C@@H]1[C@H](O)[C@H](O[C@H]2O[C@H](CN)[C@@H](O)C[C@H]2N)[C@@H](N)C[C@H]1N	Te	0
pancuronium	1	O(C(=O)C)C1C2(C(CC1[N+]1(CCCCC1)C)C1C(CC2)C2(CC([N+]3(CCCCC3)C)C(OC(=O)C)CC2CC1)C)C	Te	0
cefoxitin sodium	1	s1cccc1CC(=O)NC1(OC)C2SCC(COC(=O)N)=C(N2C1=O)C(O)=O	Te	0
cysteamine	1	SCCN	Te	0
paromomycin	1	O1[C@@H](CN)[C@@H](O)[C@H](O)[C@@H](N)[C@H]1O[C@H]1[C@@H](O)[C@@H](O[C@@H]1CO)O[C@H]1[C@H](O[C@H]2O[C@H](CO)[C@@H](O)[C@H](O)[C@H]2N)[C@@H](N)C[C@@H](N)[C@@H]1O	Te	0
Lactulose	1	O1[C@](O)(CO)[C@@H](O)[C@H](O[C@@H]2O[C@H](CO)[C@H](O)[C@H](O)[C@H]2O)[C@H]1CO	Te	0
Zanamivir	1	O1[C@@H]([C@H](O)[C@H](O)CO)[C@H](NC(=O)C)[C@@H](NC(N)=N)C=C1C(O)=O	Te	0
deferoxamine	1	O=C(N(O)CCCCCNC(=O)CCC(=O)N(O)CCCCCN)CCC(=O)NCCCCCN(O)C(=O)C	Te	0
Nedocromil	1	O1c2c(cc3c(N(CC)C(=CC3=O)C(O)=O)c2CCC)C(=O)C=C1C(O)=O	Te	0
pyrantel embonate	0	Oc1c(c2c(cc1C(O)=O)cccc2)Cc1c2c(cc(C(O)=O)c1O)cccc2	Te	0
Amygdalin	0	O1[C@H](CO)[C@@H](O)[C@H](O)[C@@H](O)[C@@H]1OC[C@H]1O[C@@H](O[C@H](C#N)c2ccccc2)[C@H](O)[C@@H](O)[C@@H]1O	Te	0
Iohexol	1	Ic1c(C(=O)NC[C@H](O)CO)c(I)c(N(C(=O)C)C[C@H](O)CO)c(I)c1C(=O)NC[C@H](O)CO	Te	0
Moexipril_diacid	1	O(C)c1cc2C[C@H](N(Cc2cc1OC)C(=O)[C@@H](N[C@@H](CCc1ccccc1)C(O)=O)C)C(O)=O	Te	0
albendazole	1	S(CCC)c1cc2[nH]c(nc2cc1)NC(OC)=O	Te	0
physostigmine	1	O(C(=O)NC)c1cc2c(N([C@H]3N(CC[C@@]23C)C)C)cc1	Te	0
diphemanil	1	[N+]1(CCC(CC1)=C(c1ccccc1)c1ccccc1)(C)C	Te	0
Trospium	1	O(C(=O)C(O)(c1ccccc1)c1ccccc1)C1C[C@@H]2[N+]3([C@H](C1)CC2)CCCC3	Te	0
penciclovir	1	O=C1N=C(Nc2n(cnc12)CCC(CO)CO)N	Te	0
doxorubicin	1	O1[C@@H](C)[C@@H](O)[C@@H](N)C[C@@H]1O[C@@H]1c2c(C[C@](O)(C1)C(=O)CO)c(O)c1c(C(=O)c3c(cccc3OC)C1=O)c2O	Te	0
eprosartan	1	s1cccc1C\C(=C/c1n(Cc2ccc(cc2)C(O)=O)c(nc1)CCCC)\C(O)=O	Te	0
melagatran	0	OC(=O)CN[C@@H](C(=O)N1CC[C@H]1C(=O)NCc1ccc(cc1)C(N)=N)C1CCCCC1	Te	0
pyridostigmine	1	O(C(=O)N(C)C)c1ccc[n+](c1)C	Te	0
iloprost	1	OC1CC2C(CC(C2)=CCCCC(O)=O)C1C=CC(O)C(CC#CC)C	Te	0
mannitol	1	OC(C(O)C(O)CO)C(O)CO	Te	0
bambuterol	1	O(C(=O)N(C)C)c1cc(cc(OC(=O)N(C)C)c1)C(O)CNC(C)(C)C	Te	0
bretylium tosilate	1	Brc1ccccc1[CH-][N+](CC)(C)C	Te	0
lisinopril	1	OC(=O)C1N(CCC1)C(=O)C(NC(CCc1ccccc1)C(O)=O)CCCCN	Te	0
Netivudine	0	O1[C@H](CO)[C@@H](O)[C@H](O)[C@@H]1N1C=C(C#CC)C(=O)NC1=O	Te	0
pafenolol	0	O(CC(O)CNC(C)C)c1ccc(cc1)CCNC(=O)NC(C)C	Te	0
Fosmidomycin	1	P(O)(O)(=O)CCCN(O)C=O	Te	0
idarubicin hydrochloride	1	O1C(C)C(O)C(N)CC1OC1CC(O)(Cc2c1c(O)c1c(C(=O)c3c(cccc3)C1=O)c2O)C(=O)C	Te	1
ribavirin	1	O1[C@H](CO)[C@@H](O)[C@@H](O)[C@@H]1n1nc(nc1)C(=O)N	Te	1
Sulpiride	1	S(=O)(=O)(N)c1cc(C(=O)NC[C@H]2N(CCC2)CC)c(OC)cc1	Te	1
didanosine	1	O1C(CCC1n1c2ncnc(O)c2nc1)CO	Te	1
fluoxymesterone	1	F[C@@]12[C@H]([C@@H]3CC[C@@](O)(C)[C@]3(C[C@@H]1O)C)CCC1=CC(=O)CC[C@@]12C	Te	1
Trandolapril	1	O(CC)C(=O)[C@@H](N[C@H](C(=O)N1[C@@H]2[C@@H](C[C@H]1C(O)=O)CCCC2)C)CCc1ccccc1	Te	1
mercaptopurine	1	S=C1N=CNc2nc[nH]c12	Te	1
methylphenobarbital	1	O=C1N(C)C(=O)NC(=O)C1(CC)c1ccccc1	Te	1
levomepromazine	1	S1c2c(N(c3c1cccc3)CC(CN(C)C)C)cc(OC)cc2	Te	1
Tranexamic_acid	1	OC(=O)C1CCC(CC1)CN	Te	1
Valsartan	1	OC(=O)[C@@H](N(Cc1ccc(cc1)-c1ccccc1-c1[nH]nnn1)C(=O)CCCC)C(C)C	Te	1
celiprolol hydrochloride	1	O(CC(O)CNC(C)(C)C)c1ccc(NC(=O)N(CC)CC)cc1C(=O)C	Te	1
Oxytetracycline	1	OC=1[C@@H](N(C)C)[C@H]2[C@@](O)(C(=O)C=1C(=O)N)C(=O)C=1[C@@H]([C@](O)(c3c(C=1O)c(O)ccc3)C)[C@@H]2O	Te	1
Ramipril	1	O(CC)C(=O)[C@@H](N[C@H](C(=O)N1[C@@H]2[C@H](C[C@H]1C(O)=O)CCC2)C)CCc1ccccc1	Te	1
azithromycin	1	O1C(CC)C(O)(C)C(O)C(N(CC(CC(O)(C)C(OC2OC(CC(N(C)C)C2O)C)C(C)C(OC2OC(C)C(O)C(OC)(C2)C)C(C)C1=O)C)C)C	Te	1
chlortetracycline hydrochloride	1	Clc1c2c(C(=O)C=3C(CC4C(O)(C(=O)C(C(=O)N)=C(O)C4N(C)C)C=3O)C2(O)C)c(O)cc1	Te	1
gabapentin	1	OC(=O)CC1(CCCCC1)CN	Te	1
enalapril	1	O(CC)C(=O)[C@H](N[C@@H](C(=O)N1CCC[C@H]1C(O)=O)C)CCc1ccccc1	Te	1
Tolrestat	1	S=C(N(CC(O)=O)C)c1c2c(ccc1)c(C(F)(F)F)c(OC)cc2	Te	1
vismodegib	1	Clc1ccc(NC(=O)c2ccc(S(=O)(=O)C)cc2Cl)cc1-c1ncccc1	Te	1
brompheniramine maleate	1	Brc1ccc(cc1)C(CCN(C)C)c1ncccc1	Te	1
lorcainide	0	Clc1ccc(N(C(=O)Cc2ccccc2)C2CCN(CC2)C(C)C)cc1	Te	1
tocopheryl acetat	0	O1c2c(CCC1(CCCC(CCCC(CCCC(C)C)C)C)C)c(C)c(OC(=O)C)c(C)c2C	Te	1
Desogestrel	1	O[C@@]1(CC[C@H]2[C@H]3[C@@H]([C@@H]4C(CC3)=CCCC4)C(C[C@]12CC)=C)C#C	Te	1
chlortalidone	1	Clc1ccc(cc1S(=O)(=O)N)C1(O)NC(=O)c2c1cccc2	Te	1
Almotriptan	1	S(=O)(=O)(N1CCCC1)Cc1cc2c([nH]cc2CCN(C)C)cc1	Te	1
Clavulanic_acid	1	O\1[C@H]2N([C@@H](C(O)=O)/C/1=C/CO)C(=O)C2	Te	1
clavulanate potassium	1	O1C2N(C(C(O)=O)C1=CCO)C(=O)C2	Te	1
rilpivirine	1	n1c(Nc2c(cc(cc2C)\C=C\C#N)C)ccnc1Nc1ccc(cc1)C#N	Te	1
Sibutramine	1	Clc1ccc(cc1)C1(CCC1)[C@H](N(C)C)CC(C)C	Te	1
Tolterodine	1	Oc1ccc(cc1[C@@H](CCN(C(C)C)C(C)C)c1ccccc1)C	Te	1
carboplatin	1	[Pt]1OC(=O)C2(CCC2)C(O1)=O.N.N	Te	1
Urapidil	0	O(C)c1ccccc1N1CCN(CC1)CCCNC=1N(C)C(=O)N(C)C(=O)C=1	Te	1
Carvedilol	1	O(CCNC[C@@H](OCc1c2c3c([nH]c2ccc1)cccc3)O)c1ccccc1OC	Te	1
Clonazepam	1	Clc1ccccc1C1=NCC(=O)Nc2c1cc([N+](=O)[O-])cc2	Te	1
Dantrolene	1	o1c(ccc1\C=N\N1CC(=O)NC1=O)-c1ccc([N+](=O)[O-])cc1	Te	1
Enoximone	1	S(C)c1ccc(cc1)C(=O)C1=NC(=O)N=C1C	Te	1
Methoxyamphetamine	1	O(C)c1cc(ccc1)C[C@H](N)C	Te	1
Quinidine	1	O(C)c1cc2c(nccc2[C@H](O)[C@H]2N3C[C@@H]([C@H](C2)CC3)C=C)cc1	Te	1
Riboflavin	1	O=C1NC(=O)N=C2N(c3cc(C)c(cc3N=C12)C)C[C@@H](O)[C@@H](O)[C@@H](O)CO	Te	1
Trimipramine	1	N(C[C@@H](CN1c2c(CCc3c1cccc3)cccc2)C)(C)C	Te	1
cinacalcet	1	FC(F)(F)c1cc(ccc1)CCCN[C@H](C)c1c2c(ccc1)cccc2	Te	1
digoxin	1	O1C(C)C(OC2OC(C)C(O)C(O)C2)C(O)CC1OC1C(OC(OC2CC3CCC4C(CC(O)C5(C)C(CCC45O)C4=CC(OC4)=O)C3(CC2)C)CC1O)C	Te	1
metyrapone	1	O=C(C(C)(C)c1cccnc1)c1cccnc1	Te	1
perhexiline	1	N1CCCCC1CC(C1CCCCC1)C1CCCCC1	Te	1
pizotifen malate	1	s1c2c(cc1)C(c1c(CC2)cccc1)=C1CCN(CC1)C	Te	1
Flecainide	1	FC(F)(F)COc1ccc(OCC(F)(F)F)cc1C(=O)NC[C@@H]1NCCCC1	Te	1
Sorivudine	0	Br\C=C\C1=CN([C@@H]2O[C@H](CO)[C@@H](O)[C@@H]2O)C(=O)NC1=O	Te	1
ethylbenzene	0	c1ccccc1CC	Te	1
fenofibrate	1	Clc1ccc(cc1)C(=O)c1ccc(OC(C(OC(C)C)=O)(C)C)cc1	Te	1
mepindolol	0	O(CC(O)CNC(C)C)c1c2cc([nH]c2ccc1)C	Te	1
mycophenolic_acid	1	O1Cc2c(c(O)c(C\C=C(\CCC(O)=O)/C)c(OC)c2C)C1=O	Te	1
valdecoxib	1	S(=O)(=O)(N)c1ccc(cc1)-c1c(noc1C)-c1ccccc1	Te	1
Acebutolol	1	O(C[C@@H](O)CNC(C)C)c1ccc(NC(=O)CCC)cc1C(=O)C	Te	1
Chlorguanide	1	Clc1ccc(NC(NC(NC(C)C)=N)=N)cc1	Te	1
Piretanide	0	S(=O)(=O)(N)c1cc(cc(N2CCCC2)c1Oc1ccccc1)C(O)=O	Te	1
aprindine	1	N(CCCN(CC)CC)(C1Cc2c(C1)cccc2)c1ccccc1	Te	1
Metoclopramide	1	Clc1cc(C(=O)NCCN(CC)CC)c(OC)cc1N	Te	1
Moricizine	1	S1c2c(N(c3c1cccc3)C(=O)CCN1CCOCC1)cc(NC(OCC)=O)cc2	Te	1
Dihydrocodeine	1	O1[C@@H]2[C@]34[C@H]([C@H](N(CC3)C)Cc3c4c1c(OC)cc3)CC[C@@H]2O	Te	1
Amantadine	1	NC12CC3CC(C1)CC(C2)C3	Te	1
Diazoxide	1	Clc1cc2S(O)(=O)=NC(=Nc2cc1)C	Te	1
Diethylstilbestrol	1	Oc1ccc(cc1)/C(=C(\CC)/c1ccc(O)cc1)/CC	Te	1
Felbamate	1	O(CC(COC(=O)N)c1ccccc1)C(=O)N	Te	1
Isotretinoin	1	OC(=O)\C=C(\C=C\C=C(\C=C/C=1C(CCCC=1C)(C)C)/C)/C	Te	1
Mefenamic_acid	1	OC(=O)c1ccccc1Nc1cccc(C)c1C	Te	1
Telmisartan	1	OC(=O)c1ccccc1-c1ccc(cc1)Cn1c2c(nc1CCC)c(cc(c2)-c1nc2c(n1C)cccc2)C	Te	1
Tibolone	1	O=C1CC=2C[C@H]([C@H]3[C@@H]4CC[C@](O)(C#C)[C@]4(CC[C@@H]3C=2CC1)C)C	Te	1
carbazepine10_11epoxide	0	O1C2C1c1c(N(c3c2cccc3)C(=O)N)cccc1	Te	1
etacrynic-acid	1	Clc1c(Cl)c(OCC(O)=O)ccc1C(=O)C(CC)=C	Te	1
ginkgolide_b	1	O1C2C(O)(C34OC5OC(=O)C(O)C56C3(C(OC4=O)CC6C(C)(C)C)C2O)C(C)C1=O	Te	1
lofexidine	1	Clc1cccc(Cl)c1OC(C)C=1NCCN=1	Te	1
toliprolol	0	O(CC(O)CNC(C)C)c1cc(ccc1)C	Te	1
chloropromazine	1	Clc1cc2N(c3c(Sc2cc1)cccc3)CCCN(C)C	Te	1
naftidrofuryl oxalate	0	O1CCCC1CC(Cc1c2c(ccc1)cccc2)C(OCCN(CC)CC)=O	Te	1
Scopolamine	1	O1[C@H]2[C@H]3N([C@@H]([C@@H]12)CC(OC(=O)[C@H](CO)c1ccccc1)C3)C	Te	1
Tetrahydrocannabinol	0	O1c2c([C@H]3[C@@H](CCC(=C3)C)C1(C)C)c(O)cc(c2)CCCCC	Te	1
estazolam	1	Clc1cc2c(-n3c(nnc3)CN=C2c2ccccc2)cc1	Te	1
Atropine	1	O(C(=O)[C@H](CO)c1ccccc1)C1C[C@@H]2N([C@H](C1)CC2)C	Te	1
Nicotinic_acid	1	OC(=O)c1cccnc1	Te	1
ciclopirox	1	O=C1N(O)C(=CC(=C1)C)C1CCCCC1	Te	1
Acipimox	1	OC(=O)c1ncc([n+]([O-])c1)C	Te	1
Carbimazole	1	S=C1N(C=CN1C)C(OCC)=O	Te	1
Chorpropamide	0	Clc1ccc(S(=O)(=O)NC(=O)NCCC)cc1	Te	1
Clopenthixol	1	Clc1cc\2c(Sc3c(cccc3)/C/2=C\CCN2CCN(CC2)CCO)cc1	Te	1
Dothiepin	1	S1Cc2c(cccc2)\C(\c2c1cccc2)=C/CCN(C)C	Te	1
Ketoprofen	1	OC(=O)[C@H](C)c1cc(ccc1)C(=O)c1ccccc1	Te	1
Nizatidine	1	s1cc(nc1CN(C)C)CSCCN\C(\NC)=C/[N+](=O)[O-]	Te	1
Pefloxacin	1	Fc1cc2c(N(C=C(C(O)=O)C2=O)CC)cc1N1CCN(CC1)C	Te	1
Pentazocine	1	Oc1cc2c(C[C@@H]3N(CC[C@@]2(C)[C@H]3C)CC=C(C)C)cc1	Te	1
Perindopril	1	O(CC)C(=O)[C@H](N[C@@H](C(=O)N1[C@@H]2[C@H](C[C@H]1C(O)=O)CCCC2)C)CCC	Te	1
Propafenone	1	O(C[C@@H](O)CNCCC)c1ccccc1C(=O)CCc1ccccc1	Te	1
Propoxyphene	1	O([C@]([C@@H](CN(C)C)C)(Cc1ccccc1)c1ccccc1)C(=O)CC	Te	1
Tacrine	1	n1c2c(CCCC2)c(N)c2c1cccc2	Te	1
Zolpidem	1	O=C(N(C)C)Cc1n2C=C(C=Cc2nc1-c1ccc(cc1)C)C	Te	1
dextropropoxyphene hydrochloride	1	O(C(Cc1ccccc1)(C(CN(C)C)C)c1ccccc1)C(=O)CC	Te	1
methylergometrine maleate	1	OCC(NC(=O)C1C=C2C(N(C1)C)Cc1c3c2cccc3n(c1)C)C	Te	1
zuclopenthixol	1	Clc1cc\2c(Sc3c(cccc3)/C/2=C/CCN2CCN(CC2)CCO)cc1	Te	1
Cotinine	1	O=C1N(C)[C@@H](CC1)c1cccnc1	Te	1
Diclofenac	1	Clc1cccc(Cl)c1Nc1ccccc1CC(O)=O	Te	1
Oxazepam	1	Clc1cc2c(NC(=O)[C@H](O)N=C2c2ccccc2)cc1	Te	1
benzene	0	c1ccccc1	Te	1
palonosetron	1	O=C1N(C[C@H]2CCCc3c2c1ccc3)[C@H]1C2CCN(C1)CC2	Te	1
sulfadiazine	1	S(=O)(=O)(Nc1ncccn1)c1ccc(N)cc1	Te	1
Cyproterone_acetate	1	ClC=1C2=CC(=O)[C@H]3[C@H](C3)[C@@]2([C@@H]2[C@H]([C@@H]3CC[C@](OC(=O)C)(C(=O)C)[C@]3(CC2)C)C=1)C	Te	1
Rivastigmine	1	O(C(=O)N(CC)C)c1cc(ccc1)[C@@H](N(C)C)C	Te	1
vilazodone	1	Cl.o1c2c(cc1C(=O)N)cc(N1CCN(CC1)CCCCc1c3cc(ccc3[nH]c1)C#N)cc2	Te	1
Chlordiazepoxide	1	Clc1cc2c(N=C(NC)C[N+]([O-])=C2c2ccccc2)cc1	Te	1
Ciprofibrate	0	ClC1(Cl)C[C@@H]1c1ccc(OC(C(O)=O)(C)C)cc1	Te	1
Prednisolone	1	O=C1C=C2CC[C@@H]3[C@@H]([C@]2(C=C1)C)[C@@H](O)C[C@]1([C@H]3CC[C@]1(O)C(=O)CO)C	Te	1
Tiacrilast	0	S(C)c1cc2c(N=CN(\C=C\C(O)=O)C2=O)cc1	Te	1
Tolmetin	1	OC(=O)Cc1n(C)c(cc1)C(=O)c1ccc(cc1)C	Te	1
Viloxazine	1	O1CCNC[C@@H]1COc1ccccc1OCC	Te	1
propanolol	1	O(C[C@H](O)CNC(C)C)c1c2c(ccc1)cccc2	Te	1
tapentadol	1	Oc1cc(ccc1)[C@@H]([C@H](CN(C)C)C)CC	Te	1
Amosulalol	0	S(=O)(=O)(N)c1cc(ccc1[C@H](O)CNCCOc1ccccc1OC)C	Te	1
Bornaprine	1	O(C(=O)[C@@]1([C@H]2CC[C@@H](C1)C2)c1ccccc1)CCCN(CC)CC	Te	1
Carbamazepine	1	O=C(N)N1c2c(C=Cc3c1cccc3)cccc2	Te	1
Cicaprost	0	O[C@@H]1C[C@H]2[C@H](C\C(\C2)=C/COCC(O)=O)[C@H]1C#C[C@@H](O)[C@H](CC#CCC)C	Te	1
Coumarin	0	O1c2c(C=CC1=O)cccc2	Te	1
Dextromoramide	1	O1CCN(CC1)C[C@H](C(C(=O)N1CCCC1)(c1ccccc1)c1ccccc1)C	Te	1
Ergotamine	1	O1[C@](NC(=O)[C@@H]2C=C3[C@H](N(C2)C)Cc2c4c3cccc4[nH]c2)(C)C(=O)N2[C@@H](Cc3ccccc3)C(=O)N3[C@@H](CCC3)[C@]12O	Te	1
Ethinyl_Estradiol	1	Oc1cc2CC[C@H]3[C@@H]4CC[C@@](O)(C#C)[C@]4(CC[C@@H]3c2cc1)C	Te	1
Fenclofenac	0	Clc1cc(Cl)ccc1Oc1ccccc1CC(O)=O	Te	1
Flupentixol	1	S1c2c(cc(cc2)C(F)(F)F)\C(\c2c1cccc2)=C\CCN1CCN(CC1)CCO	Te	1
Fusidic_acid	1	O(C(=O)C)[C@H]/1C[C@]2([C@@H](C[C@@H](O)[C@H]3[C@@]2(CC[C@H]2[C@H](C)[C@H](O)CC[C@@]23C)C)\C\1=C(/CCC=C(C)C)\C(O)=O)C	Te	1
Glipizide	1	S(=O)(=O)(NC(=O)NC1CCCCC1)c1ccc(cc1)CCNC(=O)c1ncc(nc1)C	Te	1
Letrozole	1	n1cn(nc1)C(c1ccc(cc1)C#N)c1ccc(cc1)C#N	Te	1
Levobunolol	1	O(C[C@@H](O)CNC(C)(C)C)c1c2c(ccc1)C(=O)CCC2	Te	1
Lormetazepam	1	Clc1ccccc1C1=N[C@H](O)C(=O)N(c2c1cc(Cl)cc2)C	Te	1
Lornoxicam	1	Clc1sc2c(S(=O)(=O)N(C)C(C(=O)Nc3ncccc3)=C2O)c1	Te	1
Megestrol_acetate	1	O=C1CC[C@@]2([C@@H]3[C@H]([C@@H]4CC[C@](OC(=O)C)(C(=O)C)[C@]4(CC3)C)C=C(C2=C1)C)C	Te	1
Meperidine	1	O(C(=O)C1(CCN(CC1)C)c1ccccc1)CC	Te	1
Midazolam	1	Clc1cc2c(-n3c(CN=C2c2ccccc2F)cnc3C)cc1	Te	1
Nicorandil	1	O([N+](=O)[O-])CCNC(=O)c1cccnc1	Te	1
Penbutolol	1	O(C[C@@H](O)CNC(C)(C)C)c1ccccc1C1CCCC1	Te	1
Phenindione	1	O=C1c2c(cccc2)C(=O)C1c1ccccc1	Te	1
Procarbazine	1	O=C(NC(C)C)c1ccc(cc1)CNNC	Te	1
Selegiline	1	N([C@@H](Cc1ccccc1)C)(CC#C)C	Te	1
Terfenadine	1	OC(C1CCN(CC1)CCC[C@@H](O)c1ccc(cc1)C(C)(C)C)(c1ccccc1)c1ccccc1	Te	1
amiodarone	1	Ic1cc(cc(I)c1OCCN(CC)CC)C(=O)c1c2c(oc1CCCC)cccc2	Te	1
antrafenine	1	FC(F)(F)c1cc(N2CCN(CC2)CCOC(=O)c2ccccc2Nc2c3c(ncc2)cc(cc3)C(F)(F)F)ccc1	Te	1
beta-d-fructose	0	OC(C(O)C(=O)CO)C(O)CO	Te	1
buflomedil	0	O(C)c1cc(OC)cc(OC)c1C(=O)CCCN1CCCC1	Te	1
bufuralol	1	o1c2c(cc1C(O)CNC(C)(C)C)cccc2CC	Te	1
busulfan	1	S(OCCCCOS(=O)(=O)C)(=O)(=O)C	Te	1
carprofen	1	Clc1cc2c3c([nH]c2cc1)cc(cc3)C(C(O)=O)C	Te	1
cefadroxil	1	S1C2N(C(=O)C2NC(=O)C(N)c2ccc(O)cc2)C(C(O)=O)=C(C1)C	Te	1
cefazolin	1	s1c(nnc1SCC=1CS[C@H]2N(C=1C(O)=O)C(=O)[C@H]2NC(=O)Cn1nnnc1)C	Te	1
chenodeoxycholic_acid	1	O[C@@H]1CC[C@]2([C@@H](C1)C[C@@H](O)[C@H]1[C@@H]3CC[C@H]([C@@H](CCC(O)=O)C)[C@]3(CC[C@@H]12)C)C	Te	1
cicloprolol	0	O(CC(O)CNC(C)C)c1ccc(OCCOCC2CC2)cc1	Te	1
clinafloxacin	0	Clc1c2N(C=C(C(O)=O)C(=O)c2cc(F)c1N1CC(N)CC1)C1CC1	Te	1
colchicine	1	O(C)C1=CC=C2C(=CC1=O)C(NC(=O)C)CCc1c2c(OC)c(OC)c(OC)c1	Te	1
ethanol	1	OCC	Te	1
fenspiride	1	O1C2(CCN(CC2)CCc2ccccc2)CNC1=O	Te	1
fleroxacin	1	Fc1c2N(CC(C(O)=O)C(=O)c2cc(F)c1N1CCN(CC1)C)CCF	Te	1
loracarbef	1	ClC=1CCC2N(C(=O)C2NC(=O)C(N)c2ccccc2)C=1C(O)=O	Te	1
lymecycline	1	OC=1[C@@H](N(C)C)[C@@H]2C[C@H]3C(=C(O)[C@]2(O)C(=O)C=1C(=O)NCNCCCC[C@H](N)C(O)=O)C(=O)c1c(cccc1O)[C@]3(O)C	Te	1
roquinimex	1	OC=1c2c(N(C)C(=O)C=1C(=O)N(C)c1ccccc1)cccc2	Te	1
zidovudine	1	O1[C@H](CO)[C@@H](N=[N+]=[N-])C[C@@H]1N1C=C(C)C(=O)NC1=O	Te	1
carglumic _acid	1	OC(=O)CC[C@H](NC(=O)N)C(O)=O	Te	1
	Note:1,drug; 0,drug-like

## Sheet: External
DrugCard	Name	Structure	Dosage	Class
DB01434	19-norandrostenedione	O=C1CC[C@@H]2[C@H]3[C@@H]([C@H]4C(=CC(=O)CC4)CC3)CC[C@@]12C	Powder:Oral; Tablet:Oral;	1
DB01048	Abacavir	OC[C@@H]1C[C@H](n2c3nc(nc(NC4CC4)c3nc2)N)C=C1	Solution:Oral; Tablet:Oral;	1
DB00551	Acetohydroxamic Acid	O=C(N[O-])C	Tablet:Oral;	1
DB00118	Adenosylmethionine	[S+](C[C@H]1O[C@@H](n2c3ncnc(N)c3nc2)[C@H](O)[C@@H]1O)(CC[C@H]([NH3+])C(=O)[O-])C	'Capsule:Oral; Capsule:Oral; Capsule:Oral; Capsule, delayed release:Oral; Tablet:Oral; Tablet:Oral;'	1
DB00346	Alfuzosin	O1CCC[C@@H]1C(=O)NCCCN(C)c1nc(N)c2cc(OC)c(OC)cc2n1	'Tablet, extended release:Oral;'	1
DB01246	Alimemazine	S1c2c(N(c3c1cccc3)C[C@H](C[NH+](C)C)C)cccc2	Tablet:Oral;	1
DB01258	Aliskiren	O(CCCOC)c1cc(ccc1OC)C[C@H](C(C)C)C[C@H]([NH3+])[C@H](O)C[C@H](C(C)C)C(=O)NCC(C(=O)N)(C)C	Tablet:Oral; Tablet:Oral;	1
DB00523	Alitretinoin	O=C([O-])C=C(/C=C/C=C(\C=C\C=1C(CCCC=1C)(C)C)/C)C	Capsule:Oral;	1
DB00969	Alosetron	O=C1N(CCc2n(c3c(c12)cccc3)C)Cc1nc[nH]c1C	Tablet:Oral;	1
DB01370	Aluminium	[AlH3]	Aerosol:Oral; Capsule:Oral; Liquid:Oral; Paste:Oral; Powder:Oral; Solution / drops:Oral; Suspension:Oral; Tablet:Oral;	1
DB06274	Alvimopan	Oc1cc(ccc1)[C@@]1(CC[NH+](C[C@@H]1C)C[C@@H](Cc1ccccc1)C(=O)NCC(=O)[O-])C	Capsule:Oral;	1
DB00513	Aminocaproic Acid	O=C([O-])CCCCC[NH3+]	Syrup:Oral; Tablet:Oral;	1
DB01223	Aminophylline	O=C1N(C)C(=O)N(c2[nH]cnc12)C	'Tablet:Oral; Tablet, extended release:Oral;'	1
DB00233	Aminosalicylic Acid	Oc1cc(N)ccc1C(=O)[O-]	Granule:Oral;	1
DB00701	Amprenavir	S(=O)(=O)(N(CC(C)C)C[C@H](O)[C@H](NC(O[C@H]1CCOC1)=O)Cc1ccccc1)c1ccc(N)cc1	Capsule:Oral; Liquid:Oral;	1
DB01612	Amyl Nitrite	O(N=O)CCC(C)C	Liquid:Oral; Tablet:Oral;	1
DB01125	Anisindione	O(C)c1ccc(cc1)C1C(=O)c2c(cccc2)C1=O	Tablet:Oral;	1
DB00673	Aprepitant	Fc1ccc(cc1)[C@@H]1[NH+](CCO[C@@H]1O[C@H](C)c1cc(cc(c1)C(F)(F)F)C(F)(F)F)Cc1nc(O)[nH]n1	Capsule:Oral;	1
DB01169	Arsenic trioxide	[As]12O[As](O1)O2	Tablet:Oral;	1
DB01072	Atazanavir	O(C(=O)N[C@H](C(C)(C)C)C(=O)N[C@H]([C@H](O)CN(NC(=O)[C@@H](NC(OC)=O)C(C)(C)C)Cc1ccc(cc1)-c1ncccc1)Cc1ccccc1)C	Capsule:Oral;	1
DB01076	Atorvastatin	Fc1ccc(cc1)-c1n(CC[C@H](O)C[C@H](O)CC(=O)[O-])c(C(C)C)c(C(=O)Nc2ccccc2)c1-c1ccccc1	Tablet:Oral;	1
DB01602	Bacampicillin	S1[C@H]2N([C@H](C(O[C@H](OC(OCC)=O)C)=O)C1(C)C)C(=O)[C@H]2NC(=O)[C@H]([NH3+])c1ccccc1	Suspension:Oral; Tablet:Oral;	1
DB01014	Balsalazide	Oc1ccc(\N=N\c2ccc(cc2)C(=O)NCCC(=O)[O-])cc1C(=O)[O-]	Capsule:Oral;	1
DB00245	Benzatropine	O(C(c1ccccc1)c1ccccc1)C1C[C@H]2[NH+]([C@H](C1)CC2)C	Solution:Oral; Tablet:Oral;	1
DB01086	Benzocaine	O(C(=O)c1ccc(N)cc1)CC	Gel:Oral; Liquid:Oral; Paste:Oral; Swab:Oral;	1
DB00868	Benzonatate	O(C(=O)c1ccc(NCCCC)cc1)CCOCCOCCOCCOCCOCCOCCOCCOCCOC	Capsule:Oral;	1
DB00865	Benzphetamine	[NH+]([C@H](Cc1ccccc1)C)(Cc1ccccc1)C	Tablet:Oral;	1
DB04890	Bepotastine	Clc1ccc(cc1)[C@H](OC1CC[NH+](CC1)CCCC(=O)[O-])c1ncccc1	Tablet:Oral;	1
DB00217	Bethanidine	Oc1cc2C[C@H](/[N+](/c2cc1O)=C\C=C\1/C=C(N[C@H](C/1)C(=O)[O-])C(=O)[O-])C(=O)[O-]	Tablet:Oral;	1
DB00307	Bexarotene	O=C([O-])c1ccc(cc1)C(=C)c1cc2c(cc1C)C(CCC2(C)C)(C)C	Capsule:Oral;	1
DB00121	Biotin	S1C[C@H]2NC(=O)N[C@H]2[C@H]1CCCCC(=O)[O-]	'Powder, for solution:Oral; Tablet:Oral;'	1
DB01294	Bismuth Subsalicylate	[BiH]1OC(=O)c2c(O1)cccc2	Liquid:Oral; Suspension:Oral; Tablet:Oral;	1
DB00241	Butalbital	O=C1NC(=O)NC(=O)C1(CC(C)C)CC=C	Tablet:Oral;	1
DB00248	Cabergoline	O=C(N(CCC[NH+](C)C)C(=O)NCC)[C@H]1C[C@@H]2[C@H]([NH+](C1)CC=C)Cc1c3c2cccc3[nH]c1	Tablet:Oral;	1
DB00146	Calcidiol	O[C@H]1C\C(=C\C=C2[C@@H]3CC[C@H]([C@H](CCCC(O)(C)C)C)[C@]3(CCC2)C)\C(CC1)=C	Capsule:Oral; Tablet:Oral;	1
DB00258	Calcium Acetate	O=C([O-])C	Liquid:Oral; Solution / drops:Oral; Tablet:Oral;	1
DB01164	Calcium Chloride	[Cl-]	Liquid:Oral; Solution / drops:Oral;	1
DB00326	Calcium Gluceptate	OC[C@H](O)[C@H](O)[C@H](O)[C@H](O)[C@H](O)C(=O)[O-]	Solution:Oral;	1
DB00796	Candesartan	O(CC)c1nc2c(n1Cc1ccc(cc1)-c1ccccc1-c1n[n-]nn1)c(ccc2)C(=O)[O-]	Tablet:Oral;	1
DB00411	Carbachol	O(CC[N+](C)(C)C)C(=O)N	Tablet:Oral;	1
DB00578	Carbenicillin	S1[C@H]2N([C@@H](C(=O)[O-])C1(C)C)C(=O)[C@H]2NC(=O)[C@@H](C(=O)[O-])c1ccccc1	'Tablet, film coated:Oral;'	1
DB00748	Carbinoxamine	Clc1ccc(cc1)[C@H](OCC[NH+](C)C)c1ncccc1	'Solution / drops:Oral; Syrup:Oral; Tablet:Oral; Tablet, extended release:Oral;'	1
DB00395	Carisoprodol	O(C[C@@](CCC)(COC(=O)N)C)C(=O)NC(C)C	Tablet:Oral;	1
DB00833	Cefaclor	ClC=1CS[C@@H]2N(C=1C(=O)[O-])C(=O)[C@@H]2NC(=O)[C@H]([NH3+])c1ccccc1	'Capsule:Oral; Powder:Oral; Powder, for solution:Oral; Powder, for suspension:Oral; Suspension:Oral;'	1
DB00535	Cefdinir	s1cc(nc1N)C(=NO)C(=O)N[C@@H]1[C@@H]2SCC(C=C)=C(N2C1=O)C(=O)[O-]	'Capsule:Oral; Powder, for suspension:Oral;'	1
DB01066	Cefditoren	s1cnc(C)c1C=CC=1CS[C@@H]2N(C=1C(OCOC(=O)C(C)(C)C)=O)C(=O)[C@@H]2NC(=O)\C(=N\OC)\c1nc(sc1)N	Tablet:Oral;	1
DB01415	Ceftibuten	s1cc(nc1N)C(=CCC(=O)[O-])C(=O)N[C@@H]1[C@@H]2SCC=C(N2C1=O)C(=O)[O-]	Capsule:Oral; Suspension:Oral;	1
DB00439	Cerivastatin	Fc1ccc(cc1)-c1c(COC)c(nc(C(C)C)c1\C=C\[C@H](O)C[C@H](O)CC(=O)[O-])C(C)C	Tablet:Oral;	1
DB00185	Cevimeline	S1C[C@@]2(O[C@@H]1C)C1CC[NH+](C2)CC1	Capsule:Oral;	1
DB00269	Chlorotrianisene	ClC(=C(c1ccc(OC)cc1)c1ccc(OC)cc1)c1ccc(OC)cc1	Capsule:Oral;	1
DB01239	Chlorprothixene	Clc1cc\2c(Sc3c(cccc3)/C/2=C/CC[NH+](C)C)cc1	Concentrate:Oral; Syrup:Oral; Tablet:Oral;	1
DB00169	Cholecalciferol	O[C@H]1C\C(=C\C=C2[C@@H]3CC[C@H]([C@H](CCCC(C)C)C)[C@]3(CCC2)C)\C(CC1)=C	Capsule:Oral; Tablet:Oral;	1
DB00122	Choline	OCC[N+](C)(C)C	Tablet:Oral;	1
DB01166	Cilostazol	O(CCCCc1nnnn1C1CCCCC1)c1cc2CCC(=O)Nc2cc1	Tablet:Oral;	1
DB00845	Clofazimine	Clc1ccc(N2C3=CC(=NC(C)C)C(Nc4ccc(Cl)cc4)=CC3=Nc3c2cccc3)cc1	Capsule:Oral;	1
DB04837	Clofedanol	Clc1ccccc1[C@@](O)(CC[NH+](C)C)c1ccccc1	Syrup:Oral;	1
DB00882	Clomifene	ClC(=C(c1ccc(OCC[NH+](CC)CC)cc1)c1ccccc1)c1ccccc1	Tablet:Oral;	1
DB01521	Clostebol	ClC1=C2CC[C@H]3[C@H]4CC[C@H](O)[C@@]4(CC[C@@H]3[C@@]2(CCC1=O)C)C	'Capsule:Oral; Powder, for solution:Oral;'	1
DB01559	Clotiazepam	Clc1ccccc1C1=NCC(=O)N(c2sc(cc12)CC)C	Tablet:Oral;	1
DB00930	Colesevelam	[NH2+](CCCCCCCCCC)CC=C	'Tablet, film coated:Oral;'	1
DB00286	Conjugated Estrogens	S(Oc1cc2CC[C@H]3[C@H]4CCC(=O)[C@@]4(CC[C@H]3c2cc1)C)(=O)(=O)[O-]	Tablet:Oral;	1
DB01003	Cromoglicic acid	O1c2c(C(=O)C=C1C(=O)[O-])c(OC[C@@H](O)COc1cc3c(OC(=CC3=O)C(=O)[O-])cc1)ccc2	Capsule:Oral;	1
DB00115	Cyanocobalamin	P(O[C@@H]1[C@@H](O)[C@@H](O[C@@H]1CO)n1c2cc(C)c(cc2nc1)C)(O[C@H](CNC(=O)CC[C@]1(C=2[N-][C@H]([C@]3(N=C([C@@H](CCC(=O)N)[C@]3(CC(=O)N)C)C(=C3N=C(C=C4N=C([C@@H](CCC(=O)N)C4(C)C)C=2C)[C@@H](CCC(=O)N)[C@]3(CC(=O)N)C)C)C)[C@H]1CC(=O)N)C)C)(=O)[O-]	'Capsule:Oral; Liquid:Oral; Powder:Oral; Tablet:Oral; Tablet, extended release:Oral;'	1
DB04838	Cyclandelate	O(C(=O)[C@H](O)c1ccccc1)[C@@H]1CC(C[C@H](C1)C)(C)C	Tablet:Oral;	1
DB01176	Cyclizine	[NH+]1(CC[NH+](CC1)C)C(c1ccccc1)c1ccccc1	Tablet:Oral;	1
DB01406	Danazol	o1ncc2C[C@]3([C@H]4[C@@H]([C@@H]5CC[C@@](O)(C#C)[C@]5(CC4)C)CCC3=Cc12)C	Capsule:Oral;	1
DB00496	Darifenacin	O1CCc2cc(ccc12)CC[NH+]1C[C@H](CC1)C(C(=O)N)(c1ccccc1)c1ccccc1	'Tablet, extended release:Oral;'	1
DB01264	Darunavir	S(=O)(=O)(N(CC(C)C)C[C@H](O)[C@H](NC(O[C@@H]1[C@H]2[C@@H](OC1)OCC2)=O)Cc1ccccc1)c1ccc(N)cc1	Tablet:Oral;	1
DB01254	Dasatinib	Clc1cccc(C)c1NC(=O)c1sc(nc1)Nc1nc(nc(N2CC[NH+](CC2)CCO)c1)C	Tablet:Oral;	1
DB01609	Deferasirox	Oc1ccccc1-c1nc(nn1-c1ccc(cc1)C(=O)[O-])-c1ccccc1O	'Tablet, for suspension:Oral;'	1
DB00618	Demeclocycline	Clc1c2c(C([O-])=C3[C@H](C[C@@H]4[C@@](O)(C([O-])=C(C(=O)N)C(=O)[C@@H]4[NH+](C)C)C3=O)[C@H]2O)c(O)cc1	Tablet:Oral;	1
DB00967	Desloratadine	Clc1cc2c(cc1)C(c1ncccc1CC2)=C1CC[NH2+]CC1	Syrup:Oral; Tablet:Oral;	1
DB00035	Desmopressin	S1SCCC(=O)N[C@H](Cc2ccc(O)cc2)C(=O)N[C@H](Cc2ccccc2)C(=O)N[C@H](CCC(=O)N)C(=O)N[C@H](CC(=O)N)C(=O)N[C@H](C1)C(=O)N1CCC[C@H]1C(=O)N[C@@H](CCC\[NH+]=C(\N)/N)C(=O)NCC(=O)N	Tablet:Oral;	1
DB00514	Dextromethorphan	O(C)c1cc2[C@@]34[C@H]([C@H]([NH+](CC3)C)Cc2cc1)CCCC4	Capsule:Oral; Liquid:Oral; Lozenge:Oral; Strip:Oral; Suspension:Oral; Syrup:Oral; Tablet:Oral;	1
DB01144	Diclofenamide	Clc1c(S(=O)(=O)N)cc(S(=O)(=O)N)cc1Cl	Tablet:Oral;	1
DB00485	Dicloxacillin	Clc1cccc(Cl)c1-c1noc(C)c1C(=O)N[C@@H]1[C@@H]2SC(C)(C)[C@H](N2C1=O)C(=O)[O-]	'Capsule:Oral; Powder, for solution:Oral;'	1
DB00266	Dicoumarol	O1c2c(cccc2)C(=O)C(CC=2C(=O)c3c(OC=2[O-])cccc3)=C1[O-]	Tablet:Oral;	1
DB00154	Dihomo-gamma-linolenic acid	O=C([O-])CCCCCC\C=C\C\C=C\C\C=C\CCCCC	Capsule:Oral;	1
DB01070	Dihydrotachysterol	O[C@H]1C\C(=C\C=C2[C@@H]3CC[C@H]([C@H](C=C[C@H](C(C)C)C)C)[C@]3(CCC2)C)\[C@H](CC1)C	'Solution, concentrate:Oral; Tablet:Oral;'	1
DB00343	Diltiazem	S1c2c(N(CC[NH+](C)C)C(=O)[C@@H](OC(=O)C)[C@H]1c1ccc(OC)cc1)cccc2	'Capsule, extended release:Oral; Tablet:Oral; Tablet, extended release:Oral;'	1
DB00985	Dimenhydrinate	O(C(c1ccccc1)c1ccccc1)CC[NH+](C)C	'Capsule:Oral; Liquid:Oral; Syrup:Oral; Tablet:Oral; Tablet, multilayer:Oral;'	1
DB00917	Dinoprostone	O=C1C[C@@H](O)[C@H](C=C[C@@H](O)CCCCC)[C@@H]1C\C=C\CCCC(=O)[O-]	Tablet:Oral;	1
DB01075	Diphenhydramine	O(C(c1ccccc1)c1ccccc1)CC[NH+](C)C	'Capsule:Oral; Elixir:Oral; Liquid:Oral; Lozenge:Oral; Strip:Oral; Syrup:Oral; Tablet:Oral; Tablet, chewable:Oral;'	1
DB01231	Diphenidol	OC(CCC[NH+]1CCCCC1)(c1ccccc1)c1ccccc1	Tablet:Oral;	1
DB00954	Dirithromycin	O1[C@H](CC)[C@](O)([C@H]2O[C@@H]([NH2+][C@H]([C@H](C[C@@](O)(C)[C@H](O[C@H]3O[C@@H](C[C@@H]([NH+](C)C)[C@@H]3O)C)[C@@H](C)[C@H](O[C@@H]3O[C@@H](C)[C@@H](O)[C@](OC)(C3)C)[C@@H](C)C1=O)C)[C@H]2C)COCCOC)C	'Tablet, film coated:Oral;'	1
DB00843	Donepezil	O(C)c1cc2c(cc1OC)C[C@@H](CC1CC[NH+](CC1)Cc1ccccc1)C2=O	'Tablet:Oral; Tablet, orally disintegrating:Oral;'	1
DB00366	Doxylamine	O([C@@](C)(c1ccccc1)c1ncccc1)CC[NH+](C)C	Tablet:Oral;	1
DB00470	Dronabinol	O1c2c([C@H]3[C@H](CCC(=C3)C)C1(C)C)c(O)cc(c2)CCCCC	Capsule:Oral;	1
DB01395	Drospirenone	O1[C@]2([C@H]3[C@@H]([C@H]4[C@@H]5[C@@H](CC[C@]24C)[C@@]2(CCC(=O)C=C2[C@@H]2[C@H]5C2)C)C3)CCC1=O	Tablet:Oral;	1
DB06262	Droxidopa	Oc1cc(ccc1O)[C@@H](O)[C@@H]([NH3+])C(=O)[O-]	Tablet:Oral;	1
DB00476	Duloxetine	s1cccc1[C@H](Oc1c2c(ccc1)cccc2)CC[NH2+]C	'Capsule, coated pellets:Oral;'	1
DB01126	Dutasteride	FC(F)(F)c1ccc(cc1NC(=O)[C@@H]1CC[C@@H]2[C@H]3[C@H](CC[C@@]12C)[C@]1([C@H](NC(=O)C=C1)CC3)C)C(F)(F)F	Capsule:Oral;	1
DB00645	Dyclonine	O(CCCC)c1ccc(cc1)C(=O)CC[NH+]1CCCCC1	Lozenge:Oral; Spray:Oral;	1
DB00378	Dydrogesterone	O=C1CC[C@]2([C@@H]3[C@@H]([C@@H]4CC[C@H](C(=O)C)[C@@]4(CC3)C)C=CC2=C1)C	Tablet:Oral;	1
DB00651	Dyphylline	O=C1N(C)C(=O)N(c2ncn(c12)C[C@H](O)CO)C	Tablet:Oral;	1
DB00625	Efavirenz	Clc1cc2c(NC(O[C@@]2(C#CC2CC2)C(F)(F)F)=O)cc1	Capsule:Oral; Tablet:Oral;	1
DB00216	Eletriptan	S(=O)(=O)(CCc1cc2c([nH]cc2C[C@H]2[NH+](CCC2)C)cc1)c1ccccc1	Tablet:Oral;	1
DB00668	Epinephrine	Oc1cc(ccc1O)[C@@H](O)C[NH2+]C	Liquid:Oral; Solution / drops:Oral;	1
DB00700	Eplerenone	O1[C@@]2(CCC1=O)CC[C@H]1[C@@H]3[C@@]4(O[C@H]4C[C@@]12C)[C@]1(C(=CC(=O)CC1)C[C@@H]3C(OC)=O)C	'Tablet, film coated:Oral;'	1
DB00153	Ergocalciferol	O[C@H]1C\C(=C\C=C2[C@@H]3CC[C@H]([C@H](C=C[C@H](C(C)C)C)C)[C@]3(CCC2)C)\C(CC1)=C	Capsule:Oral;	1
DB01253	Ergonovine	OC[C@@H](NC(=O)[C@@H]1C=C2[C@@H]([NH+](C1)C)Cc1c3c2cccc3[nH]c1)C	Tablet:Oral;	1
DB00530	Erlotinib	O(CCOC)c1cc2c(ncnc2Nc2cc(ccc2)C#C)cc1OCCOC	Tablet:Oral;	1
DB01175	Escitalopram	Fc1ccc(cc1)[C@]1(OCc2cc(ccc12)C#N)CCC[NH+](C)C	Tablet:Oral;	1
DB00783	Estradiol	Oc1cc2CC[C@H]3[C@H]4CC[C@H](O)[C@@]4(CC[C@H]3c2cc1)C	Tablet:Oral;	1
DB00655	Estrone	Oc1cc2CC[C@H]3[C@H]4CCC(=O)[C@@]4(CC[C@H]3c2cc1)C	Liquid:Oral; Solution / drops:Oral;	1
DB00402	Eszopiclone	Clc1ccc(nc1)N1[C@H](OC(=O)N2CC[NH+](CC2)C)c2nccnc2C1=O	'Tablet, film coated:Oral;'	1
DB00189	Ethchlorvynol	ClC=C[C@](O)(CC)C#C	Capsule:Oral;	1
DB00392	Ethopropazine	S1c2c(N(c3c1cccc3)C[C@H]([NH+](CC)CC)C)cccc2	Tablet:Oral;	1
DB00754	Ethotoin	O=C1N(CC)C(=O)N[C@@H]1c1ccccc1	Tablet:Oral;	1
DB00311	Ethoxzolamide	s1c2cc(OCC)ccc2nc1S(=O)(=O)N	Capsule:Oral; Tablet:Oral;	1
DB00990	Exemestane	O=C1CC[C@@H]2[C@H]3[C@H](CC[C@@]12C)[C@]1(C(=CC(=O)C=C1)C(C3)=C)C	Tablet:Oral;	1
DB01463	Fencamfamine	[NH2+](CC)[C@H]1[C@H]2CC[C@@H](C2)[C@H]1c1ccccc1	Syrup:Oral; Tablet:Oral;	1
DB00950	Fexofenadine	OC(C1CC[NH+](CC1)CCC[C@@H](O)c1ccc(cc1)C(C(=O)[O-])(C)C)(c1ccccc1)c1ccccc1	Tablet:Oral;	1
DB01148	Flavoxate	O1c2c(cccc2C(OCC[NH+]2CCCCC2)=O)C(=O)C(C)=C1c1ccccc1	Tablet:Oral;	1
DB00623	Fluphenazine	S1c2c(N(c3c1cccc3)CCC[NH+]1CC[NH+](CC1)CCO)cc(cc2)C(F)(F)F	Elixir:Oral; Tablet:Oral;	1
DB01319	Fosamprenavir	S(=O)(=O)(N(CC(C)C)C[C@@H](OP(=O)([O-])[O-])[C@H](NC(O[C@H]1CCOC1)=O)Cc1ccccc1)c1ccc(N)cc1	Suspension:Oral; Tablet:Oral;	1
DB00614	Furazolidone	O1CCN(N=Cc2oc([N+](=O)[O-])cc2)C1=O	Liquid:Oral; Tablet:Oral;	1
DB00317	Gefitinib	Clc1cc(Nc2ncnc3c2cc(OCCC[NH+]2CCOCC2)c(OC)c3)ccc1F	Tablet:Oral;	1
DB01155	Gemifloxacin	Fc1cc2c(nc1N1C\C(=N\OC)\[C@@H](C1)C[NH3+])N(C=C(C(=O)[O-])C2=O)C1CC1	Tablet:Oral;	1
DB00142	Glutamic Acid	O=C([O-])CC[C@H]([NH3+])C(=O)[O-]	Capsule:Oral;	1
DB00365	Grepafloxacin	Fc1c(c2c(N(C=C(C(=O)[O-])C2=O)C2CC2)cc1N1C[C@@H]([NH2+]CC1)C)C	'Tablet, film coated:Oral;'	1
DB00400	Griseofulvin	Clc1c2O[C@@]3([C@H](CC(=O)C=C3OC)C)C(=O)c2c(OC)cc1OC	Suspension:Oral; Tablet:Oral;	1
DB00874	Guaifenesin	O(C[C@H](O)CO)c1ccccc1OC	Liquid:Oral; Syrup:Oral;	1
DB01170	Guanethidine	[NH2+]=C(NCC[NH+]1CCCCCCC1)N	Tablet:Oral;	1
DB00801	Halazepam	Clc1cc2c(N(CC(F)(F)F)C(=O)CN=C2c2ccccc2)cc1	Tablet:Oral;	1
DB00117	Histidine	O=C([O-])[C@@H]([NH3+])Cc1nc[nH]c1	Capsule:Oral; Powder:Oral; Tablet:Oral;	1
DB00200	Hydroxocobalamin	P(O[C@@H]1[C@@H](O)[C@@H](O[C@@H]1CO)n1c2cc(C)c(cc2nc1)C)(O[C@H](CNC(=O)CC[C@]1(C=2[N-][C@H]([C@]3(N=C([C@@H](CCC(=O)N)[C@]3(CC(=O)N)C)C(=C3N=C(C=C4N=C([C@@H](CCC(=O)N)C4(C)C)C=2C)[C@@H](CCC(=O)N)[C@]3(CC(=O)N)C)C)C)[C@H]1CC(=O)N)C)C)(=O)[O-]	Solution:Oral;	1
DB00424	Hyoscyamine	O(C(=O)[C@@H](CO)c1ccccc1)C1C[C@H]2[NH+]([C@H](C1)CC2)C	Solution / drops:Oral; Tablet:Oral;	1
DB00710	Ibandronate	P(=O)([O-])([O-])C(P(=O)([O-])[O-])(O)CC[NH+](CCCCC)C	'Tablet, film coated:Oral;'	1
DB00159	Icosapent	O=C([O-])CCC\C=C\C\C=C\C\C=C\C\C=C\C\C=C\CC	Capsule:Oral;	1
DB01592	Iron	[Fe]	'Capsule:Oral; Liquid:Oral; Solution / drops:Oral; Syrup:Oral; Tablet:Oral; Tablet, coated:Oral; Tablet, extended release:Oral;'	1
DB00167	Isoleucine	O=C([O-])[C@@H]([NH3+])[C@H](CC)C	Capsule:Oral; Powder:Oral; Tablet:Oral;	1
DB01020	Isosorbide Mononitrate	O1[C@@H]2[C@@H](OC[C@@H]2O)[C@H](O[N+](=O)[O-])C1	'Tablet:Oral; Tablet, extended release:Oral;'	1
DB01259	Lapatinib	Clc1cc(Nc2ncnc3c2cc(cc3)-c2oc(cc2)C[NH2+]CCS(=O)(=O)C)ccc1OCc1cc(F)ccc1	Tablet:Oral;	1
DB00583	L-Carnitine	O=C([O-])C[C@@H](O)C[N+](C)(C)C	Liquid:Oral; Tablet:Oral;	1
DB00149	Leucine	O=C([O-])[C@@H]([NH3+])CC(C)C	Capsule:Oral; Powder:Oral; Tablet:Oral;	1
DB00650	Leucovorin	Oc1nc(nc2NC[C@H](N(c12)C=O)CNc1ccc(cc1)C(=O)N[C@@H](CCC(=O)[O-])C(=O)[O-])N	Tablet:Oral;	1
DB01137	Levofloxacin	Fc1cc2c3N(C=C(C(=O)[O-])C2=O)[C@H](COc3c1N1CC[NH+](CC1)C)C	Tablet:Oral;	1
DB01227	Levomethadyl Acetate	O([C@@H](C(C[C@@H]([NH+](C)C)C)(c1ccccc1)c1ccccc1)CC)C(=O)C	'Solution, concentrate:Oral;'	1
DB00854	Levorphanol	Oc1cc2[C@]34[C@H]([C@H]([NH+](CC3)C)Cc2cc1)CCCC4	Tablet:Oral;	1
DB01583	Liotrix	Ic1cc(cc(I)c1Oc1cc(I)c(O)c(I)c1)C[C@H]([NH3+])C(=O)[O-]	'Tablet, multilayer:Oral;'	1
DB01255	Lisdexamfetamine	O=C(N[C@H](Cc1ccccc1)C)[C@H]([NH3+])CCCC[NH3+]	'Capsule, extended release:Oral;'	1
DB01356	Lithium	[Li+]	'Capsule:Oral; Liquid:Oral; Syrup:Oral; Tablet, extended release:Oral;'	1
DB01601	Lopinavir	O(CC(=O)N[C@@H]([C@@H](O)C[C@H](NC(=O)[C@H](N1CCCNC1=O)C(C)C)Cc1ccccc1)Cc1ccccc1)c1c(cccc1C)C	Capsule:Oral; Solution:Oral;	1
DB00408	Loxapine	Clc1cc2c(Oc3c(N=C2N2CC[NH+](CC2)C)cccc3)cc1	Solution:Oral; Tablet:Oral;	1
DB01283	Lumiracoxib	Clc1cccc(F)c1Nc1ccc(cc1CC(=O)[O-])C	Tablet:Oral;	1
DB01378	Magnesium	[Mg+2]	Aerosol:Oral; Capsule:Oral; Liquid:Oral; Pellet:Oral; Powder:Oral; Solution:Oral; Solution / drops:Oral; Suspension:Oral; Syrup:Oral; Tablet:Oral;	1
DB01377	Magnesium oxide	[MgH2-]O	Liquid:Oral; Powder:Oral; Solution / drops:Oral; Tablet:Oral;	1
DB00653	Magnesium Sulfate	S(=O)(=O)([O-])[O-]	Liquid:Oral; Pellet:Oral; Powder:Oral; Solution / drops:Oral;	1
DB04835	Maraviroc	FC1(F)CCC(CC1)C(=O)N[C@H](CC[NH+]1[C@H]2CC(n3c(nnc3C)C(C)C)C[C@@H]1CC2)c1ccccc1	'Tablet, film coated:Oral;'	1
DB00657	Mecamylamine	[NH2+](C)[C@]1([C@H]2CC[C@@H](C2)C1(C)C)C	Tablet:Oral;	1
DB00737	Meclizine	Clc1ccc(cc1)[C@@H]([NH+]1CC[NH+](CC1)Cc1cc(ccc1)C)c1ccccc1	'Tablet, chewable:Oral;'	1
DB00603	Medroxyprogesterone Acetate	O=C1CC[C@@]2([C@H]3[C@@H]([C@@H]4CC[C@@](O)(C(=O)C)[C@]4(CC3)C)C[C@@H](C2=C1)C)C	Tablet:Oral;	1
DB01042	Melphalan	ClCCN(CCCl)c1ccc(cc1)C[C@H]([NH3+])C(=O)[O-]	Tablet:Oral;	1
DB01043	Memantine	[NH3+]C12C[C@]3(C[C@@](C1)(CC(C2)C3)C)C	Tablet:Oral;	1
DB00825	Menthol	O[C@H]1C[C@H](CC[C@@H]1C(C)C)C	Liquid:Oral; Lozenge:Oral; Solution / drops:Oral;	1
DB04843	Mepenzolate	O(C(=O)C(O)(c1ccccc1)c1ccccc1)[C@H]1CCC[N+](C1)(C)C	Tablet:Oral;	1
DB00933	Mesoridazine	S1c2c(N(c3c1cccc3)CC[C@H]1[NH+](CCCC1)C)cc(S(=O)C)cc2	Tablet:Oral;	1
DB00660	Metaxalone	O1[C@H](CNC1=O)COc1cc(cc(c1)C)C	Tablet:Oral;	1
DB01577	Methamphetamine	[NH2+]([C@@H](Cc1ccccc1)C)C	Tablet:Oral;	1
DB00940	Methantheline	O1c2c(cccc2)C(c2c1cccc2)C(OCC[N+](CC)(CC)C)=O	Tablet:Oral;	1
DB00703	Methazolamide	S1\C(=N\C(=O)C)\N(N=C1S(=O)(=O)N)C	Tablet:Oral;	1
DB00134	Methionine	S(CC[C@H]([NH3+])C(=O)[O-])C	Capsule:Oral; Powder:Oral; Tablet:Oral; Tablet:Oral;	1
DB01403	Methotrimeprazine	S1c2c(N(c3c1cccc3)C[C@@H](C[NH+](C)C)C)cc(OC)cc2	Tablet:Oral;	1
DB00553	Methoxsalen	O1c2c(C=CC1=O)cc1c(occ1)c2OC	Capsule:Oral;	1
DB00232	Methyclothiazide	Clc1cc2N[C@@H](N(S(=O)(=O)c2cc1S(=O)(=O)N)C)CCl	Tablet:Oral;	1
DB00765	Metyrosine	Oc1ccc(cc1)C[C@@]([NH3+])(C(=O)[O-])C	Capsule:Oral;	1
DB00211	Midodrine	O(C)c1ccc(OC)cc1[C@H](O)CNC(=O)C[NH3+]	Tablet:Oral;	1
DB01442	MMDA	O1c2c(OC1)cc(cc2OC)C[C@H]([NH3+])C	Tablet:Oral;	1
DB01618	Molindone	O1CC[NH+](CC1)C[C@@H]1CCc2[nH]c(C)c(c2C1=O)CC	Tablet:Oral;	1
DB00471	Montelukast	Clc1cc2nc(ccc2cc1)\C=C\c1cc(ccc1)[C@H](SCC1(CC1)CC(=O)[O-])CCc1ccccc1C(O)(C)C	Granule:Oral; Tablet:Oral;	1
DB00486	Nabilone	O1c2c([C@H]3[C@H](CCC(=O)C3)C1(C)C)c(O)cc(c2)C(CCCCCC)(C)C	Capsule:Oral;	1
DB00157	NADH	P(OC[C@@H]1O[C@H](N2C=C(CC=C2)C(=O)N)[C@@H](O)[C@H]1O)(OP(OC[C@H]1O[C@@H](n2c3ncnc(N)c3nc2)[C@H](O)[C@@H]1O)(=O)[O-])(=O)[O-]	Tablet:Oral;	1
DB00607	Nafcillin	S1[C@@H]2N([C@H](C(=O)[O-])C1(C)C)C(=O)[C@@H]2NC(=O)c1c2c(ccc1OCC)cccc2	Solution:Oral;	1
DB04861	Nebivolol	Fc1cc2CC[C@@H](Oc2cc1)[C@@H](O)C[NH2+]C[C@H](O)[C@@H]1Oc2c(cc(F)cc2)CC1	Tablet:Oral; Tablet:Oral; Tablet:Oral;	1
DB00220	Nelfinavir	S(C[C@H](NC(=O)c1cccc(O)c1C)[C@H](O)C[NH+]1C[C@@H]2[C@H](C[C@H]1C(=O)NC(C)(C)C)CCCC2)c1ccccc1	Powder:Oral; Tablet:Oral;	1
DB00507	Nitazoxanide	s1c([N+](=O)[O-])cnc1NC(=O)c1ccccc1OC(=O)C	Suspension:Oral; Tablet:Oral;	1
DB00336	Nitrofural	o1c(ccc1[N+](=O)[O-])\C=N\[N-]C(=O)N	'Capsule:Oral; Powder:Oral; Powder, for solution:Oral; Solution:Oral; Tablet:Oral;'	1
DB00727	Nitroglycerin	O([N+](=O)[O-])C(CO[N+](=O)[O-])CO[N+](=O)[O-]	Liquid:Oral; Solution / drops:Oral; Tablet:Oral;	1
DB00368	Norepinephrine	Oc1cc(ccc1O)[C@@H](O)C[NH3+]	Tablet:Oral;	1
DB00717	Norethisterone	O=C1CC[C@H]2[C@@H]3[C@H]([C@H]4CC[C@@](O)(C#C)[C@@]4(CC3)C)CCC2=C1	Tablet:Oral;	1
DB00646	Nystatin	O1[C@H](C)[C@@H](C)[C@@H](O)[C@H](C=CC=CCCC=CC=CC=CC=C[C@H](O[C@H]2O[C@H](C)[C@H](O)[C@H]([NH3+])[C@@H]2O)C[C@@H](O)[C@H](C(=O)[O-])[C@@H](O)CC(=O)C[C@@H](O)[C@@H](O)CC[C@@H](O)C[C@@H](O)C[C@@H](O)CC1=O)C	Solution / drops:Oral; Suspension:Oral; Tablet:Oral;	1
DB00334	Olanzapine	s1c2Nc3c(N=C(N4CC[NH+](CC4)C)c2cc1C)cccc3	'Tablet:Oral; Tablet, orally disintegrating:Oral;'	1
DB00275	Olmesartan	O1C(COC(=O)c2n(Cc3ccc(cc3)-c3ccccc3-c3n[n-]nn3)c(nc2C(O)(C)C)CCC)=C(OC1=O)C	Tablet:Oral;	1
DB00816	Orciprenaline	Oc1cc(cc(O)c1)[C@@H](O)C[NH2+]C(C)C	Syrup:Oral;	1
DB00129	Ornithine	O=C([O-])[C@@H]([NH3+])CCC[NH3+]	Capsule:Oral; Capsule:Oral; Capsule:Oral; Capsule:Oral; Powder:Oral;	1
DB00713	Oxacillin	S1[C@@H]2N([C@H](C(=O)[O-])C1(C)C)C(=O)[C@@H]2NC(=O)c1c(noc1C)-c1ccccc1	Capsule:Oral;	1
DB01267	Paliperidone	Fc1cc2onc(c2cc1)C1CC[NH+](CC1)CCC=1C(=O)N2C(=NC=1C)[C@@H](O)CCC2	'Tablet, extended release:Oral; Tablet, extended release:Oral; Tablet, extended release:Oral;'	1
DB01384	Paramethasone	F[C@@H]1C2=CC(=O)C=C[C@]2([C@@H]2[C@@H]([C@@H]3C[C@H](C)[C@](O)(C(=O)CO)[C@@]3(C[C@H]2O)C)C1)C	Tablet:Oral;	1
DB01230	Pemoline	O1[C@@H](c2ccccc2)C(=O)N=C1N	'Tablet:Oral; Tablet, chewable:Oral;'	1
DB00686	Pentosan Polysulfate	S(O[C@@H]1[C@H](OS(=O)(=O)[O-])[C@H](OC[C@@H]1O[C@@H]1OC[C@H](O)[C@H](OS(=O)(=O)[O-])[C@@H]1OS(=O)(=O)[O-])O)(=O)(=O)[O-]	Capsule:Oral;	1
DB01579	Phendimetrazine	O1CC[NH+](C)[C@H](C)[C@@H]1c1ccccc1	Tablet:Oral;	1
DB00780	Phenelzine	N(N)CCc1ccccc1	Tablet:Oral;	1
DB00417	Phenoxymethylpenicillin	S1[C@H]2N([C@@H](C(=O)[O-])C1(C)C)C(=O)[C@H]2NC(=O)COc1ccccc1	'Powder, for solution:Oral; Suspension:Oral; Tablet:Oral;'	1
DB00191	Phentermine	[NH3+]C(Cc1ccccc1)(C)C	Capsule:Oral;	1
DB00692	Phentolamine	Oc1cc(N(CC2=[NH+]CCN2)c2ccc(cc2)C)ccc1	'Tablet, extended release:Oral;'	1
DB00388	Phenylephrine	Oc1cc(ccc1)[C@@H](O)C[NH2+]C	Strip:Oral; Tablet:Oral;	1
DB00466	Picrotoxin	O1[C@H]2[C@H]3OC(=O)[C@]45O[C@@H]4C[C@](O)([C@@H]([C@H]2C(O)(C)C)C1=O)[C@]35C	Liquid:Oral; Solution / drops:Oral;	1
DB01085	Pilocarpine	O1C[C@@H](Cc2n(cnc2)C)[C@@H](CC)C1=O	Liquid:Oral; Solution / drops:Oral; Tablet:Oral;	1
DB00592	Piperazine	[NH2+]1CC[NH2+]CC1	Liquid:Oral; Solution / drops:Oral; Syrup:Oral;	1
DB01604	Pivampicillin	S1[C@H]2N([C@H](C(OCOC(=O)C(C)(C)C)=O)C1(C)C)C(=O)[C@H]2NC(=O)[C@H]([NH3+])c1ccccc1	Tablet:Oral;	1
DB01344	Polystyrene sulfonate	S(=O)(=O)([O-])c1ccccc1C=C	Liquid:Oral;	1
DB00761	Potassium Chloride	[Cl-]	'Capsule, extended release:Oral; Liquid:Oral; Powder, for solution:Oral; Solution:Oral; Solution / drops:Oral; Tablet:Oral; Tablet, extended release:Oral;'	1
DB01588	Prazepam	Clc1cc2c(N(CC3CC3)C(=O)CN=C2c2ccccc2)cc1	Tablet:Oral;	1
DB00635	Prednisone	O=C1C=C2CC[C@@H]3[C@@H]([C@@]2(C=C1)C)C(=O)C[C@@]1([C@@H]3CC[C@@]1(O)C(=O)CO)C	Tablet:Oral;	1
DB01087	Primaquine	O(C)c1cc(N[C@@H](CCC[NH3+])C)c2ncccc2c1	Tablet:Oral;	1
DB00721	Procaine	O(C(=O)c1ccc(N)cc1)CC[NH+](CC)CC	'Capsule:Oral; Tablet, extended release:Oral;'	1
DB00433	Prochlorperazine	Clc1cc2N(c3c(Sc2cc1)cccc3)CCC[NH+]1CC[NH+](CC1)C	Tablet:Oral;	1
DB00165	Pyridoxine	Oc1c(CO)c(cnc1C)CO	Solution / drops:Oral; Tablet:Oral;	1
DB01589	Quazepam	Clc1cc2c(N(CC(F)(F)F)C(=S)CN=C2c2ccccc2F)cc1	Tablet:Oral;	1
DB04575	Quinestrol	O(C1CCCC1)c1cc2CC[C@H]3[C@H]4CC[C@@](O)(C#C)[C@@]4(CC[C@H]3c2cc1)C	Tablet:Oral;	1
DB01325	Quinethazone	Clc1cc2N[C@H](NC(=O)c2cc1S(=O)(=O)N)CC	Tablet:Oral;	1
DB00243	Ranolazine	O(C[C@H](O)C[NH+]1CC[NH+](CC1)CC(=O)Nc1c(cccc1C)C)c1ccccc1OC	'Tablet, film coated, extended release:Oral;'	1
DB01367	Rasagiline	[NH2+](CC#C)[C@H]1CCc2c1cccc2	Tablet:Oral; Tablet:Oral; Tablet:Oral;	1
DB01045	Rifampicin	O1c2c3c4c(c(O)c2C)c(O)c(NC(=O)C(=CC=C[C@H](C)[C@H](O)[C@H](C)[C@H](O)[C@H](C)[C@@H](OC(=O)C)[C@H](C)[C@@H](OC)C=CO[C@]1(C)C3=O)C)c(\C=N\N1CC[NH+](CC1)C)c4O	Capsule:Oral;	1
DB01201	Rifapentine	O1c2c3c4c(c(O)c2C)c(O)c(NC(=O)C(=CC=C[C@H](C)[C@H](O)[C@H](C)[C@H](O)[C@H](C)[C@@H](OC(=O)C)[C@H](C)[C@@H](OC)C=CO[C@]1(C)C3=O)C)c(\C=N\N1CC[NH+](CC1)C1CCCC1)c4O	Tablet:Oral;	1
DB01220	Rifaximin	O1c2c3c4c(c(O)c2C)c(O)c(NC(=O)C(=CC=C[C@H](C)[C@H](O)[C@H](C)[C@H](O)[C@H](C)[C@@H](OC(=O)C)[C@H](C)[C@@H](OC)C=CO[C@]1(C)C3=O)C)c1n2c(nc14)C=C(C=C2)C	Tablet:Oral;	1
DB00478	Rimantadine	[NH3+][C@@H](C)C12CC3CC(C1)CC(C2)C3	'Syrup:Oral; Tablet, film coated:Oral;'	1
DB06155	Rimonabant	Clc1cc(Cl)ccc1-n1nc(C(=O)NN2CCCCC2)c(C)c1-c1ccc(Cl)cc1	'Tablet, film coated:Oral;'	1
DB00503	Ritonavir	s1cncc1COC(=O)N[C@@H]([C@@H](O)C[C@H](NC(=O)[C@H](NC(=O)N(Cc1nc(sc1)C(C)C)C)C(C)C)Cc1ccccc1)Cc1ccccc1	Capsule:Oral; Solution:Oral;	1
DB00533	Rofecoxib	S(=O)(=O)(C)c1ccc(cc1)C=1COC(=O)C=1c1ccccc1	Suspension:Oral; Tablet:Oral;	1
DB01098	Rosuvastatin	S(=O)(=O)(N(C)c1nc(-c2ccc(F)cc2)c(\C=C\[C@H](O)C[C@H](O)CC(=O)[O-])c(n1)C(C)C)C	Tablet:Oral;	1
DB01001	Salbutamol	Oc1ccc(cc1CO)[C@@H](O)C[NH2+]C(C)(C)C	Liquid:Oral; Solution:Oral; Tablet:Oral;	1
DB00658	Sevelamer	ClC[C@@H]1OC1	Tablet:Oral;	1
DB00203	Sildenafil	S(=O)(=O)(N1CC[NH+](CC1)C)c1cc(-c2nc(O)c3n(nc(c3n2)CCC)C)c(OCC)cc1	Tablet:Oral;	1
DB00641	Simvastatin	O1[C@H](C[C@H](O)CC1=O)CC[C@H]1[C@@H]2C(=C[C@H](C[C@@H]2OC(=O)C(CC)(C)C)C)C=C[C@@H]1C	Tablet:Oral;	1
DB00877	Sirolimus	O1[C@H](CC(=O)[C@@H](C=C(C)[C@H](O)[C@@H](OC)C(=O)[C@@H](C[C@@H](C=CC=C\C=C(\C)/[C@H](OC)C[C@@H]2O[C@](O)([C@H](CC2)C)C(=O)C(=O)N2[C@@H](CCCC2)C1=O)C)C)C)[C@H](C[C@H]1C[C@H](OC)[C@@H](O)CC1)C	Solution:Oral; Tablet:Oral;	1
DB01261	Sitagliptin	Fc1cc(F)c(F)cc1C[C@@H]([NH3+])CC(=O)N1CCn2c(nnc2C(F)(F)F)C1	'Tablet, film coated:Oral;'	1
DB01390	Sodium bicarbonate	O=C([O-])[O-]	Liquid:Oral; Powder:Oral; Solution / drops:Oral; Tablet:Oral;	1
DB00398	Sorafenib	Clc1ccc(NC(=O)Nc2ccc(Oc3cc(ncc3)C(=O)NC)cc2)cc1C(F)(F)F	Tablet:Oral;	1
DB00566	Succimer	S[C@@H]([C@@H](S)C(=O)[O-])C(=O)[O-]	'Capsule, coated pellets:Oral;'	1
DB00139	Succinic acid	O=C([O-])CCC(=O)[O-]	Liquid:Oral; Solution / drops:Oral;	1
DB01298	Sulfacytine	S(=O)(=O)(NC1=NC(=O)N(C=C1)CC)c1ccc(N)cc1	Tablet:Oral;	1
DB00259	Sulfanilamide	S(=O)(=O)(N)c1ccc(N)cc1	Liquid:Oral;	1
DB01268	Sunitinib	Fc1cc\2c(NC(=O)/C/2=C/c2[nH]c(C)c(C(=O)NCC[NH+](CC)CC)c2C)cc1	Capsule:Oral;	1
DB00820	Tadalafil	O1c2cc(ccc2OC1)[C@H]1N2[C@@H](Cc3c1[nH]c1c3cccc1)C(=O)N(CC2=O)C	Tablet:Oral;	1
DB01265	Telbivudine	O1[C@H](CO)[C@@H](O)C[C@@H]1N1C=C(C)C(=O)NC1=O	Tablet:Oral;	1
DB00300	Tenofovir	P(=O)([O-])([O-])CO[C@H](Cn1c2ncnc(N)c2nc1)C	Tablet:Oral;	1
DB00894	Testolactone	O1[C@]2([C@@H]([C@H]3[C@H](CC2)[C@]2(C(=CC(=O)C=C2)CC3)C)CCC1=O)C	Tablet:Oral;	1
DB01420	Testosterone Propionate	O=C1CC[C@]2([C@@H]3[C@@H]([C@@H]4CC[C@H](OC(=O)CC)[C@@]4(CC3)C)CCC2=C1)C	Capsule:Oral;	1
DB01041	Thalidomide	O=C1NC(=O)CC[C@H]1N1C(=O)c2c(cccc2)C1=O	Capsule:Oral;	1
DB01412	Theobromine	O=C1NC(=O)N(c2ncn(c12)C)C	Solution / drops:Oral;	1
DB00277	Theophylline	O=C1N(C)C(=O)N(c2[nH]cnc12)C	'Elixir:Oral; Liquid:Oral; Tablet:Oral; Tablet, extended release:Oral;'	1
DB00152	Thiamine	s1c[n+](Cc2cnc(nc2N)C)c(C)c1CCO	Tablet:Oral;	1
DB00372	Thiethylperazine	S1c2c(N(c3c1cccc3)CCC[NH+]1CC[NH+](CC1)C)cc(SCC)cc2	Tablet:Oral;	1
DB01622	Thioproperazine	S1c2c(N(c3c1cccc3)CCC[NH+]1CC[NH+](CC1)C)cc(S(=O)(=O)N(C)C)cc2	Tablet:Oral;	1
DB01623	Thiothixene	S1c2c(cc(S(=O)(=O)N(C)C)cc2)\C(\c2c1cccc2)=C/CC[NH+]1CC[NH+](CC1)C	Capsule:Oral;	1
DB01600	Tiaprofenic acid	s1c(ccc1[C@H](C(=O)[O-])C)C(=O)c1ccccc1	'Capsule, extended release:Oral; Tablet:Oral;'	1
DB01133	Tiludronate	Clc1ccc(SC(P(=O)([O-])[O-])P(=O)([O-])[O-])cc1	Tablet:Oral;	1
DB00932	Tipranavir	S(=O)(=O)(Nc1cc(ccc1)[C@H](CC)C=1C(=O)C[C@](OC=1[O-])(CCc1ccccc1)CCC)c1ncc(cc1)C(F)(F)F	Capsule:Oral;	1
DB00839	Tolazamide	S(=O)([O-])(=NC(=O)[N-]N1CCCCCC1)c1ccc(cc1)C	Tablet:Oral;	1
DB00323	Tolcapone	Oc1c([N+](=O)[O-])cc(cc1O)C(=O)c1ccc(cc1)C	'Tablet, film coated:Oral;'	1
DB00752	Tranylcypromine	[NH3+][C@H]1C[C@H]1c1ccccc1	Tablet:Oral;	1
DB01361	Troleandomycin	O1[C@@H](C)[C@@H](C)[C@H](OC(=O)C)[C@@H](C)C(=O)[C@@]2(OC2)C[C@@H](C)[C@H](O[C@H]2O[C@@H](C[C@@H]([NH+](C)C)[C@H]2OC(=O)C)C)[C@@H](C)[C@H](O[C@@H]2O[C@H](C)[C@@H](OC(=O)C)[C@@H](OC)C2)[C@@H](C)C1=O	Capsule:Oral;	1
DB00150	Tryptophan	O=C([O-])[C@@H]([NH3+])Cc1c2c([nH]c1)cccc2	Capsule:Oral; Tablet:Oral;	1
DB06267	Udenafil	S(=O)(=O)(NCC[C@@H]1[NH+](CCC1)C)c1cc(-c2nc(O)c3n(nc(c3n2)CCC)C)c(OCCC)cc1	Tablet:Oral;	1
DB00577	Valaciclovir	Oc1nc(nc2n(cnc12)COCCOC(=O)[C@@H]([NH3+])C(C)C)N	Tablet:Oral;	1
DB01610	Valganciclovir	Oc1nc(nc2n(cnc12)CO[C@@H](COC(=O)[C@@H]([NH3+])C(C)C)CO)N	Tablet:Oral;	1
DB00862	Vardenafil	S(=O)(=O)(N1CC[NH+](CC1)CC)c1cc(C=2N=C(O)c3n(N=2)c(nc3C)CCC)c(OCC)cc1	Tablet:Oral;	1
DB00126	Vitamin C	O1[C@H]([C@@H](O)CO)C(=O)C(O)=C1[O-]	'Bar, chewable:Oral; Capsule:Oral; Capsule, extended release:Oral; Granule:Oral; Liquid:Oral; Lozenge:Oral; Powder:Oral; Powder, for solution:Oral; Solution:Oral; Solution / drops:Oral; Tablet:Oral; Ta\nblet, chewable:Oral; Tablet, effervescent:Oral; Tablet, extended release:Oral; Wafer:Oral;'	1
DB02546	Vorinostat	O=C(Nc1ccccc1)CCCCCCC(=O)N[O-]	Capsule:Oral;	1
DB00137	Xanthophyll	O[C@@H]1CC(C)(C)C(C=C\C(=C/C=C\C(=C/C=C/C=C(/C=C/C=C(/C=C[C@@H]2C(C[C@@H](O)C=C2C)(C)C)\C)\C)\C)\C)=C(C1)C	Tablet:Oral;	1
DB04898	Ximelagatran	O(C(=O)C[NH2+][C@@H](C(=O)N1CC[C@H]1C(=O)NCc1ccc(cc1)C(NO)=N)C1CCCCC1)CC	Tablet:Oral;	1
DB01392	Yohimbine	O[C@@H]1CC[C@@H]2[C@@H](C[C@H]3[NH+](CCc4c5c([nH]c34)cccc5)C2)[C@H]1C(OC)=O	Tablet:Oral;	1
DB00549	Zafirlukast	S(=O)([O-])(=NC(=O)c1cc(OC)c(cc1)Cc1c2cc(NC(OC3CCCC3)=O)ccc2n(c1)C)c1ccccc1C	Tablet:Oral;	1
DB01593	Zinc	[Zn]	'Aerosol:Oral; Capsule:Oral; Liquid:Oral; Lozenge:Oral; Powder:Oral; Solution / drops:Oral; Tablet:Oral; Tablet, extended release:Oral;'	1
DB00315	Zolmitriptan	O1C[C@@H](NC1=O)Cc1cc2c([nH]cc2CC[NH+](C)C)cc1	Tablet:Oral;	1
F
Name	SMI	label	Ammonium	N Rule-of-five
2-phenyl-2-ethylmalondiamide	O=C(N)C(CC)(C(=O)N)c1ccccc1	1	0	0
3-Ketodesogestrel	O=C1CC[C@@H]2[C@@H]3[C@H]([C@@H]4CC[C@@](O)(C#C)[C@]4(CC3=C)CC)CCC2=C1	1	0	0
Abacavir	OC[C@H]1C[C@@H](n2c3nc(nc(NC4CC4)c3nc2)N)C=C1	1	0	0
Acepromazine	S1c2c(N(c3c1cccc3)CCC[NH+](C)C)cc(cc2)C(=O)C	1	0	0
Acetohydroxamic Acid	O=C(N[O-])C	1	0	0
Acetyldigitoxin	O1CC(=CC1=O)[C@H]1CC[C@]2(O)[C@H]3[C@H](CC[C@]12C)[C@@]1([C@@H](C[C@@H](O[C@@H]2O[C@H](C)[C@@H](O[C@H]4O[C@H](C)[C@@H](O[C@H]5O[C@H](C)[C@@H](O)[C@@H](OC(=O)C)C5)[C@@H](O)C4)[C@@H](O)C2)CC1)CC3)C	1	0	2
Alafosfalin	P(=O)([O-])([O-])[C@H](NC(=O)[C@H]([NH3+])C)C	1	0	0
Alfuzosin	O1CCC[C@@H]1C(=O)NCCCN(C)c1nc(N)c2cc(OC)c(OC)cc2n1	1	0	1
Alosetron	O=C1N(CCc2n(c3c(c12)cccc3)C)Cc1nc[nH]c1C	1	0	0
Ambroxol	Brc1cc(Br)cc(C[NH2+]C2CCC(O)CC2)c1N	1	0	0
Amezinium	O(C)C=1N(N=CC(=N)C=1)c1ccccc1	1	0	0
Aminocamptothecin	O=C1CCC2=C(C=C3N(Cc4c3nc3c(c4)c(N)ccc3)C2=O)[C@@]1(O)CC	1	0	0
Aminolevulinic_acid	O=C(CCC(=O)[O-])C[NH3+]	1	0	0
Amiprilose	O1[C@H]2[C@@H](OC1(C)C)O[C@H]([C@H](O)CO)[C@@H]2OCCC[NH+](C)C	1	0	1
Amisulpride	S(=O)(=O)(CC)c1cc(C(=O)NC[C@H]2[NH+](CCC2)CC)c(OC)cc1N	1	0	0
Amodiaquine	Clc1cc2[nH+]ccc(Nc3cc(C[NH+](CC)CC)c(O)cc3)c2cc1	1	0	0
Amsalog	S(=O)(=O)(Nc1cc(OC)c(Nc2c3c([nH+]c4c2cccc4C)c(ccc3)C(=O)NC)cc1)C	1	0	1
Aprepitant	Fc1ccc(cc1)[C@@H]1[NH+](CCO[C@@H]1O[C@H](C)c1cc(cc(c1)C(F)(F)F)C(F)(F)F)CC1=NC(=O)[N-]N1	1	0	1
Artemether	O1[C@@H]2O[C@@]3(OO[C@]24[C@@H](CC[C@H]([C@@H]4CC3)C)[C@@H](C)[C@H]1OC)C	1	0	1
Atazanavir	O(C(=O)N[C@@H](C(C)(C)C)C(=O)N[C@H]([C@@H](O)CN(NC(=O)[C@@H](NC(OC)=O)C(C)(C)C)Cc1ccc(cc1)-c1ncccc1)Cc1ccccc1)C	1	0	4
Azidocillin	S1[C@@H]2N([C@@H](C(=O)[O-])C1(C)C)C(=O)[C@H]2NC(=O)[C@@H](N=[N+]=[N-])C=1[C+]=CC=CC=1	1	0	1
Bencyclane	O(CCC[NH+](C)C)C1(CCCCCC1)Cc1ccccc1	1	0	0
Benperidol	Fc1ccc(cc1)C(=O)CCC[NH+]1CCC(N2c3c(NC2=O)cccc3)CC1	1	0	0
Benzquinamide	O(C(=O)C)C1CC2[NH+](CC1C(=O)N(CC)CC)CCc1cc(OC)c(OC)cc12	1	0	0
Betamethasone	F[C@@]12[C@H]([C@@H]3C[C@H](C)[C@](O)(C(=O)CO)[C@]3(C[C@@H]1O)C)CCC1=CC(=O)C=C[C@@]12C	1	0	0
Bevantolol	O(C)c1cc(ccc1OC)CC[NH2+]C[C@H](O)COc1cc(ccc1)C	1	0	0
Biotin	S1C[C@@H]2NC(=O)N[C@@H]2[C@@H]1CCCCC(=O)[O-]	1	0	0
Bromopride	Brc1cc(C(=O)NCC[NH+](CC)CC)c(OC)cc1N	1	0	0
Brotizolam	Brc1sc2-n3c(nnc3C)CN=C(c2c1)c1ccccc1Cl	1	0	0
Budipine	[NH+]1(CCC(CC1)(c1ccccc1)c1ccccc1)C(C)(C)C	1	0	1
Cabergoline	O=C(N(CCC[NH+](C)C)C(=O)NCC)[C@@H]1C[C@H]2[C@H]([NH+](C1)CC=C)Cc1c3c2cccc3[nH]c1	1	0	1
Candesartan	O(CC)c1nc2c(n1Cc1ccc(cc1)-c1ccccc1-c1n[n-]nn1)c(ccc2)C(=O)[O-]	1	0	0
Carbenicillin	S1[C@H]2N([C@@H](C(=O)[O-])C1(C)C)C(=O)[C@H]2NC(=O)C(C(=O)[O-])c1ccccc1	1	0	1
Cefaclor	ClC=1CS[C@H]2N(C=1C(=O)[O-])C(=O)[C@H]2NC(=O)[C@@H]([NH3+])c1ccccc1	1	0	1
Ceftibuten	s1cc(nc1N)/C(=C/CC(=O)[O-])/C(=O)N[C@H]1[C@H]2SCC=C(N2C1=O)C(=O)[O-]	1	0	1
Cerivastatin	Fc1ccc(cc1)-c1c(COC)c(nc(C(C)C)c1\C=C\[C@@H](O)C[C@@H](O)CC(=O)[O-])C(C)C	1	0	0
Chloramphenicol_palmitate	ClC(Cl)C(=O)NC(C(O)c1ccc([N+](=O)[O-])cc1)COC(=O)CCCCCCCCCCCCCCC	1	0	2
Chlorprothixene	Clc1cc\2c(Sc3c(cccc3)/C/2=C\CC[NH+](C)C)cc1	1	0	0
Cladribine	Clc1cc(N)c2ncn(c2c1)[C@@H]1O[C@H](CO)[C@@H](OC)C1	1	0	0
Clofarabine	Clc1nc(N)c2ncn(c2n1)[C@@H]1O[C@H](CO)[C@@H](O)[C@@H]1F	1	0	1
Clofazimine	Clc1ccc(N2C3=C\C(=N\C(C)C)\C(Nc4ccc(Cl)cc4)=CC3=Nc3c2cccc3)cc1	1	0	1
Clomifene	Cl\C(=C(\c1ccc(OCC[NH+](CC)CC)cc1)/c1ccccc1)\c1ccccc1	1	0	1
Cocaine	O(C(=O)c1ccccc1)[C@@H]1C[C@H]2[NH+]([C@H](CC2)[C@H]1C(OC)=O)C	1	0	0
Darunavir	S(=O)(=O)(N(CC(C)C)C[C@@H](O)[C@@H](NC(O[C@@H]1[C@H]2[C@@H](OC1)OCC2)=O)Cc1ccccc1)c1ccc(N)cc1	1	0	2
Deferasirox	O=C/1C=CC=C\C\1=C/1\N\C(\NN\1c1ccc(cc1)C(=O)[O-])=C\1/C=CC=CC/1=O	1	0	0
Deflazacort	O1[C@@H]2C[C@H]3[C@H]4[C@@H]([C@@]5(C(=CC(=O)C=C5)CC4)C)[C@@H](O)C[C@]3(C)[C@@]2(N=C1C)C(=O)COC(=O)C	1	0	1
Demeclocycline	Clc1c2c(C(=O)C=3[C@H](C[C@@H]4[C@@](O)(C(=O)C(C(=O)N)=C([O-])[C@H]4[NH+](C)C)C=3[O-])[C@@H]2O)c(O)cc1	1	0	2
Depamide	O=C(N)C(CCC)CCC	1	0	0
Dextroamphetamine	[NH3+][C@H](Cc1ccccc1)C	1	0	0
Dextrose	O1[C@H](CO)[C@@H](O)[C@H](O)[C@@H](O)[C@H]1O	1	0	2
Diacetolol	O(C[C@H](O)C[NH2+]C(C)C)c1ccc(N(C(=O)CCC)C(=O)C)cc1C(=O)C	1	0	0
Dicloxacillin	Clc1cccc(Cl)c1-c1noc(C)c1C(=O)N[C@H]1[C@@H]2SC(C)(C)[C@@H](N2C1=O)C(=O)[O-]	1	0	1
Donepezil	O(C)c1cc2c(cc1OC)C[C@@H](CC1CC[NH+](CC1)Cc1ccccc1)C2=O	1	0	0
dOTC	S1[C@H](OC[C@@H]1N1C=CC(=NC1=O)N)CO	1	0	0
Droperidol	Fc1ccc(cc1)C(=O)CCC[NH+]1CCC(N2c3c(NC2=O)cccc3)=CC1	1	0	0
Drospirenone	O1[C@]2([C@@H]3[C@H]([C@H]4[C@H]5[C@H](CC[C@]24C)[C@]2(CCC(=O)C=C2[C@H]2[C@@H]5C2)C)C3)CCC1=O	1	0	1
Droxidopa	Oc1cc(ccc1O)[C@H](O)[C@@H]([NH3+])C(=O)[O-]	1	0	0
Duloxetine	s1cccc1[C@@H](Oc1c2c(ccc1)cccc2)CC[NH2+]C	1	0	0
Dutasteride	FC(F)(F)c1ccc(cc1NC(=C)C1CCC2C3C(CCC12C)C1(C(NC(=O)C=C1)CC3)C)C(F)(F)F	1	0	2
Efavirenz	Clc1cc2c(NC(O[C@]2(C#CC2CC2)C(F)(F)F)=O)cc1	1	0	0
Eletriptan	S(=O)(=O)(CCc1cc2c([nH]cc2C[C@@H]2[NH+](CCC2)C)cc1)c1ccccc1	1	0	1
Emedastine	O(CCn1c2c(nc1N1CCC[NH+](CC1)C)cccc2)CC	1	0	0
Endralazine	O=C(N1CC2=C/C(/NN=C2CC1)=N/N)c1ccccc1	1	0	0
Eplerenone	O1[C@@]2(CCC1=O)CC[C@H]1[C@H]3[C@@]4(O[C@@H]4C[C@@]12C)[C@@]1(C(=CC(=O)CC1)C[C@H]3C(OC)=O)C	1	0	1
Eproxindine	O(C)c1c2c(n(c1C(=O)NCC(O)C[NH+](CC)CC)-c1ccccc1)cccc2	1	0	0
Ergonovine	OC[C@@H](NC(=O)[C@@H]1C[C@H]2[C@H]([NH+](C1)C)Cc1c3c2cccc3[nH]c1)C	1	0	0
Erlotinib	O(CCOC)c1cc2c(ncnc2Nc2cc(ccc2)C#C)cc1OCCOC	1	0	0
Escitalopram	Fc1ccc(cc1)C1(OCc2c1ccc(c2)C#C)CCC[NH+](C)C	1	0	0
Esomeprazole	S(=O)(Cc1ncc(C)c(OC)c1C)c1[nH]c2c(n1)cc(OC)cc2	1	0	0
Eszopiclone	Clc1ccc(nc1)N1[C@@H](OC(=O)N2CC[NH+](CC2)C)c2nccnc2C1=O	1	0	1
Ethoxzolamide	s1c2cc(OCC)ccc2nc1S(=O)(=O)N	1	0	0
Exemestane	O=C1CC[C@H]2[C@H]3[C@H](CC[C@]12C)[C@@]1(C(=CC(=O)C=C1)C(C3)=C)C	1	0	0
Fenflumizole	Fc1cc(F)ccc1-c1[nH]c(c(n1)-c1ccc(OC)cc1)-c1ccc(OC)cc1	1	0	1
Fructose	O1C[C@@H](O)[C@H](O)[C@H](O)[C@]1(O)CO	1	0	1
Gemifloxacin	Fc1cc2c(nc1N1CC(C[NH3+])/C(=N\OC)/C1)N(C=C(C(=O)[O-])C2=O)C1CC1	1	0	0
Grepafloxacin	Fc1c(c2c(N(C=C(C(=O)[O-])C2=O)C2CC2)cc1N1CC([NH2+]CC1)C)C	1	0	0
Griseofulvin	Clc1c2O[C@@]3([C@@H](CC(=O)C=C3OC)C)C(=O)c2c(OC)cc1OC	1	0	0
Guanadrel Sulfate	O1C(COC12CCCCC2)C\[NH+]=C(\N)/N	1	0	0
Homocysteine	SCC[C@H]([NH3+])C(=O)[O-]	1	0	0
Isosorbide-5-mononitrate	O1[C@H]2[C@H](OC[C@@H]2O)[C@H](O[N+](=O)[O-])C1	1	0	0
Ketobemidone	Oc1cc(ccc1)C1(CC[NH+](CC1)C)C(=O)CC	1	0	0
KNI-272	S1C[C@H](N(C1)C(=O)[C@@H](O)[C@@H](NC(=O)[C@@H](NC(=O)COc1nccc2c1cccc2)CSC)Cc1ccccc1)C(=O)NC(C)(C)C	1	0	2
L-5-hydroxytryptophan	Oc1cc2c([nH]cc2C[C@@H]([NH3+])C(=O)[O-])cc1	1	0	0
L-Arginine	O=C([O-])[C@H]([NH3+])CCC\[NH+]=C(\N)/N	1	0	0
Levocabastine	Fc1ccc(cc1)C1(CCC([NH+]2C[C@@H](C)[C@@](CC2)(C(=O)[O-])c2ccccc2)CC1)C#N	1	0	0
Levofloxacin	Fc1cc2c3N(C=C(C(=O)[O-])C2=O)C(COc3c1N1CC[NH+](CC1)C)C	1	0	0
Medroxalol	O1c2cc(ccc2OC1)CC[C@@H]([NH2+]C[C@H](O)c1cc(C(=O)N)c(O)cc1)C	1	0	1
Melphalan	ClCCN(CCCl)c1ccc(cc1)C[C@@H]([NH3+])C(=O)[O-]	1	0	0
Memantine	[NH3+]C12CC3(CC(C1)(CC(C3)C2)C)C	1	0	0
Mepivacaine	O=C(Nc1c(cccc1C)C)C1[NH+](CCCC1)C	1	0	0
Methacycline	Oc1c2c(ccc1)C([C@@H]1[C@H]([C@@H](O)[C@@]3(O)[C@H]([C@H]([NH+](C)C)[C@@H](O)[C@H](C(=O)N)C3=O)[C@H]1C)C2=O)=C	1	0	2
Methadyl Acetate	O(C(C(CC([NH+](C)C)C)(c1ccccc1)c1ccccc1)CC)C(=O)C	1	0	0
Methamphetamine	[NH2+]([C@H](Cc1ccccc1)C)C	1	0	0
Methotrimeprazine	S1c2c(N(c3c1cccc3)C[C@H](C[NH+](C)C)C)cc(OC)cc2	1	0	0
Midodrine	O(C)c1ccc(OC)cc1C(O)CNC(=O)C[NH3+]	1	0	0
Mizolastine	Fc1ccc(cc1)Cn1c2c(nc1N1CCC(N(C)C=3NC(=O)C=CN=3)CC1)cccc2	1	0	0
Montelukast	Clc1cc2nc(ccc2cc1)\C=C/c1cc(ccc1)[C@H](SCC1(CC1)CC(=O)[O-])CCc1ccccc1C(O)(C)C	1	0	2
Moxestrol	Oc1cc2CC[C@H]3[C@@H]4CC[C@@](O)(C#C)[C@]4(C[C@H](OC)[C@@H]3c2cc1)C	1	0	0
N-acetylprocainamide	O=C(NCC[NH+](CC)CC)c1ccc(NC(=O)C)cc1	1	0	0
Nalmefene	O1[C@@H]2[C@]34CC[NH+]([C@H](Cc5c3c1c(O)cc5)[C@]4(O)CCC2=C)CC1CC1	1	0	0
Nebivolol	Fc1cc2CC[C@H](Oc2cc1)[C@H](O)C[NH2+]C[C@@H](O)[C@@H]1Oc2c(cc(F)cc2)CC1	1	0	1
Nelfinavir	S(C[C@H](NC(=O)c1cccc(O)c1C)[C@H](O)C[NH+]1C[C@@H]2[C@H](C[C@H]1C(=O)NC(C)(C)C)CCCC2)c1ccccc1	1	0	4
Nicainoprol	O(C[C@@H](O)C[NH2+]C(C)C)c1c2N(CCCc2ccc1)C(=O)c1cccnc1	1	0	0
Nitazoxanide	s1c([N+](=O)[O-])cnc1NC(=O)c1ccccc1OC(=O)C	1	0	0
Nordazepam	Clc1cc2c(NC(=O)CN=C2c2ccccc2)cc1	1	0	0
Norzimelidine	Brc1ccc(cc1)\C(=C/C[NH2+]C)\c1cccnc1	1	0	0
Olanzapine	s1c2Nc3c(N=C(N4CC[NH+](CC4)C)c2cc1C)cccc3	1	0	0
Orciprenaline	Oc1cc(cc(O)c1)[C@@H](O)C[NH2+]C(C)C	1	0	0
Oxacillin	S1[C@H]2N([C@@H](C(=O)[O-])C1(C)C)C(=O)[C@H]2NC(=O)c1c(noc1C)-c1ccccc1	1	0	1
Penclomedine	Clc1c(OC)c(Cl)c(OC)nc1C(Cl)(Cl)Cl	1	0	0
Pentaerythritol_tetranitrate	O([N+](=O)[O-])CC(CO[N+](=O)[O-])(CO[N+](=O)[O-])CO[N+](=O)[O-]	1	0	0
Pentopril	O(CC)C(=O)[C@@H](C[C@H](C(=O)N1c2c(C[C@H]1C(=O)[O-])cccc2)C)C	1	0	0
Permethrin	Cl\C(\Cl)=C\C1C(C)(C)C1C(OCc1cc(Oc2ccccc2)ccc1)=O	1	0	1
Phenformin	[NH+](=C(\[NH+]=C(\N)/N)/N)/CCc1ccccc1	1	0	1
Phenylbutyrate	O=C([O-])CCCc1ccccc1	1	0	0
Phenylephrine	Oc1cc(ccc1)[C@@H](O)C[NH2+]C	1	0	0
Pimexone	O1c2c(ccc(OC)c2C[NH+]2CCCCC2)C(=O)c2c1cccc2	1	0	0
Pinacidil	[nH+]1ccc(N\C(=N\C#N)\NC(C(C)(C)C)C)cc1	1	0	0
Piritrexim	O(C)c1ccc(OC)cc1Cc1nc2c(nc1)c(C)c(nc2N)N	1	0	0
Pivampicillin	S1[C@H]2N([C@@H](C(OCOC(=O)C(C)(C)C)=O)C1(C)C)C(=O)[C@H]2NC(=O)[C@H]([NH3+])c1ccccc1	1	0	1
Prednisone	O=C1C=C2CC[C@@H]3[C@@H]([C@]2(C=C1)C)C(=O)C[C@]1([C@H]3CC[C@]1(O)C(=O)CO)C	1	0	0
Prenalterol	O(C[C@@H](O)C[NH2+]C(C)C)c1ccc(O)cc1	1	0	0
Primaquine	O(C)c1cc(N[C@@H](CCC[NH3+])C)c2ncccc2c1	1	0	0
Procaterol	Oc1c2NC(=O)C=Cc2c(cc1)[C@@H](O)[C@@H]([NH2+]C(C)C)CC	1	0	0
Proguanil	Clc1ccc(NC(=[NH+]\C(=[NH+]\C(C)C)\N)N)cc1	1	0	1
Propiomazine	S1c2c(N(c3c1cccc3)C[C@H]([NH+](C)C)C)cc(cc2)C(=O)CC	1	0	0
Quazepam	Clc1cc2c(N(CC(F)(F)F)C(=S)CN=C2c2ccccc2F)cc1	1	0	0
Ramiprilat	O=C([O-])[C@H]1N([C@@H]2[C@H](C1)CCC2)C(=O)[C@@H]([NH2+][C@H](CCc1ccccc1)C(=O)[O-])C	1	0	1
Ramixotidine	S(Cc1oc(N(C)C)cc1)CCNC(=O)c1ccc[n+]([O-])c1	1	0	0
Ranolazine	O(CC(O)C[NH+]1CC[NH+](CC1)CC(=O)Nc1c(cccc1C)C)c1ccccc1OC	1	0	0
Rasagiline	[NH2+](CC#C)[C@@H]1CCc2c1cccc2	1	0	0
Rifapentine	O1c2c3c4c(c(O)c2C)c(O)c(NC(=O)/C(=C\C=C\[C@H](C)[C@H](O)[C@@H](C)[C@@H](O)[C@@H](C)[C@H](OC(=O)C)[C@H](C)[C@@H](OC)\C=C\O[C@]1(C)C3=O)/C)c(\C=N\N1CC[NH+](CC1)C1CCCC1)c4O	1	0	4
Ritonavir	s1cncc1COC(=O)N[C@H]([C@@H](O)C[C@@H](NC(=O)[C@@H](NC(=O)N(Cc1nc(sc1)C(C)C)C)C(C)C)Cc1ccccc1)Cc1ccccc1	1	0	3
Rolipram	O(c1cc(ccc1OC)[C@H]1CC(=O)NC1)C1CCCC1	1	0	0
Rosaramicin	O1[C@H](CC)[C@H]([C@@H]2O[C@]2(\C=C/C(=O)[C@@H](C[C@H](CC=O)[C@H](O[C@@H]2O[C@@H](C[C@H]([NH+](C)C)[C@H]2O)C)[C@@H](C)[C@H](O)CC1=O)C)C)C	1	0	2
Roxithromycin	O1[C@H](CC)[C@](O)(C)[C@H](O)[C@@H](C)\C(=N\OCOCCOC)\[C@@H](C[C@](O)(C)[C@H](O[C@@H]2O[C@@H](C[C@H]([NH+](C)C)[C@H]2O)C)[C@@H](C)[C@H](O[C@H]2O[C@@H](C)[C@H](O)[C@](OC)(C2)C)[C@@H](C)C1=O)C	1	0	3
Salbutamol	Oc1ccc(cc1CO)C(O)C[NH2+]C(C)(C)C	1	0	0
Sertindole	Clc1cc2c(n(cc2C2CC[NH+](CC2)CCN2CCNC2=O)-c2ccc(F)cc2)cc1	1	0	1
Sertraline	Clc1cc(ccc1Cl)[C@@H]1CC[C@H]([NH2+]C)c2c1cccc2	1	0	0
Silodosin	FC(F)(F)COc1ccccc1OCC[NH2+][C@@H](Cc1cc(c2N(CCc2c1)CCCO)C(=O)N)C	1	0	0
Sitafloxacin	Clc1c2N(C=C(C(=O)[O-])C(=O)c2cc(F)c1N1CC2(CC2)[C@H]([NH3+])C1)[C@H]1C[C@@H]1F	1	0	0
Sitagliptin	Fc1cc(F)c(F)cc1C[C@@H]([NH3+])CC(=O)N1CCn2c(nnc2C(F)(F)F)C1	1	0	0
Sobrerol	O[C@H]1C[C@@H](CC=C1C)C(O)(C)C	1	0	0
Sorafenib	Clc1ccc(NC(=O)Nc2ccc(Oc3cc(ncc3)C(=O)NC)cc2)cc1C(F)(F)F	1	0	1
Spiramycin	O1[C@@H](C\C=C\C=C\[C@H](O[C@H]2O[C@H](C)[C@@H]([NH+](C)C)CC2)[C@@H](C[C@H](CC=O)[C@H](O[C@@H]2O[C@H](C)[C@@H](O[C@@H]3O[C@@H](C)[C@H](O)[C@](O)(C3)C)[C@H]([NH+](C)C)[C@H]2O)[C@@H](OC)[C@H](O)CC1=O)C)C	1	0	3
Spirapril	S1CCSC12C[C@H](N(C2)C(=O)[C@@H]([NH2+][C@@H](CCc1ccccc1)C(OCC)=O)C)C(=O)[O-]	1	0	1
Sulfadimethoxine	S(=O)(=O)(Nc1nc(OC)nc(OC)c1)c1ccc(N)cc1	1	0	0
Sunitinib	Fc1cc\2c(NC(=O)/C/2=C\c2[nH]c(C)c(C(=O)NCC[NH+](CC)CC)c2C)cc1	1	0	0
Talinolol	O(C[C@H](O)C[NH2+]C(C)(C)C)c1ccc(NC(=O)NC2CCCCC2)cc1	1	0	0
Tasosartan	O=C1N(c2nc(nc(c2CC1)C)C)Cc1ccc(cc1)-c1ccccc1-c1n[n-]nn1	1	0	0
Telbivudine	O1[C@@H](CO)[C@H](O)C[C@H]1N1C=C(C)C(=O)NC1=O	1	0	0
Telenzepine	s1cc2c(N(c3c(NC2=O)cccc3)C(=O)C[NH+]2CC[NH+](CC2)C)c1C	1	0	0
Temafloxacin	Fc1cc(F)ccc1N1C=C(C(=O)[O-])C(=O)c2cc(F)c(N3C[C@@H]([NH2+]CC3)C)cc12	1	0	0
Teniposide	s1cccc1[C@@]1(OC[C@H]2O[C@@H](O[C@H]3[C@H]4[C@H]([C@H](c5c3cc3OCOc3c5)c3cc(OC)c(O)c(OC)c3)C(OC4)=O)[C@H](O)[C@@H](O)[C@@H]2O1)C	1	0	2
Tertatolol	S1c2c(CCC1)cccc2OC[C@@H](O)C[NH2+]C(C)(C)C	1	0	0
Thiocyanate	S=C=Nc1c2c(ccc1)cccc2	1	0	0
Thyroxine	Ic1cc(cc(I)c1Oc1cc(I)c(O)c(I)c1)C[C@@H]([NH3+])C(=O)[O-]	1	0	1
Tiapamil	S1(=O)(=O)CCCS(=O)(=O)C1(CCC[NH+](CCc1cc(OC)c(OC)cc1)C)c1cc(OC)c(OC)cc1	1	0	1
Tiaprofenic acid	s1c(ccc1C(C(=O)[O-])C)C(=O)c1ccccc1	1	0	0
Tiopronin	S[C@H](C(=O)NCC(=O)[O-])C	1	0	0
Tolcapone	Oc1c([N+](=O)[O-])cc(cc1O)C(=O)c1ccc(cc1)C	1	0	0
Tolfenamic_acid	Clc1cccc(Nc2ccccc2C(=O)[O-])c1C	1	0	0
Toloxatone	O1[C@H](CN(c2cc(ccc2)C)C1=O)CO	1	0	0
Topotecan	O1CC2=C(C=C3N(Cc4c3nc3c(c4)c(C[NH+](C)C)c(O)cc3)C2=O)[C@@](O)(CC)C1=O	1	0	0
Tranylcypromine	[NH3+][C@@H]1CC1c1ccccc1	1	0	0
Trichlormethiazide	Clc1cc2NC(NS(=O)(=O)c2cc1S(=O)(=O)N)C(Cl)Cl	1	0	0
Trientine	[NH2+](CC[NH2+]CC[NH3+])CC[NH3+]	1	0	1
Trimazosin	O(C)c1c(OC)c2nc(nc(N)c2cc1OC)N1CCN(CC1)C(OCC(O)(C)C)=O	1	0	1
Trimetrexate	O(C)c1c(OC)cc(NCc2cnc3nc(nc(N)c3c2C)N)cc1OC	1	0	0
Tulobuterol	Clc1ccccc1[C@@H](O)C[NH2+]C(C)(C)C	1	0	0
Valganciclovir	O=C1N=C(Nc2n(cnc12)COC(COC(=O)C([NH3+])C(C)C)CO)N	1	0	1
Vitamin C	O1[C@H]([C@@H](O)CO)C(=O)C(O)=C1[O-]	1	0	0
Vorinostat	O=C(Nc1ccccc1)CCCCCCC(=O)N[O-]	1	0	0
Yohimbine	O1C[C@H]2[C@@H](C[C@H]3[NH+](CCc4c5c([nH]c34)cccc5)C2)[C@H](C(OC)=O)[C@@H]1O	1	0	1
Zolmitriptan	O1C[C@@H](NC1=O)Cc1cc2c([nH]cc2CC[NH+](C)C)cc1	1	0	0

## Sheet: scaffolds and carbon skeletons
scaffold-578
C(=C(c1ccccc1)c1ccccc1)c1ccccc1
C(=Cc1ccccc1)c1ccccc1
C(=Cc1ccccc1)CN1CCN(C(c2ccccc2)c2ccccc2)CC1
C(CC[NH+]1CCCC1)CC[NH+]1CCCC1
C(CCN1CCCCC1)=C(c1cccs1)c1cccs1
C(CCN1CCNCC1)=C1c2ccccc2Sc2ccccc21
C(CN1CCCC1)=C(c1ccccc1)c1ccccn1
C=C1C[NH+]2CCC34c5ccccc5N5C=C6C7CC8[NH+](CCC89c8ccccc8N(C=C(C1CC23)C54)C69)CC7=C
C=C1c2ccccc2CCc2ccccc21
C=C1c2ccccc2COc2ccccc21
C=C1c2ccccc2CSc2ccccc21
C=C1CC2CCCC2C1
C=C1CC2CCCC2C2CCC3=CCCCC3C12
C=C1CCC2C1CCC1C3CCCCC3CCC21
C=C1CCCCC1=CC=C1CCCC2CCCC12
C=C1CN2C(=O)CC2O1
C1=C2c3cccc4[nH]cc(c34)CC2NCC1
C1=C2CCC3C4CCCC4CCC3C2CCC1
C1=CC(c2ccc[c+]3[nH]o[nH][c+]23)C=CN1
C1=CC(c2ccccc2)C=CN1
C1=CC(NC2CCC(OC3CCCOC3)OC2)CCC1
C1=CC23CCNCc4cccc(c42)OC3CC1
C1=CC2C3Cc4cccc5c4C2(CCCN3)C(C1)O5
C1=CC2C3Cc4cccc5c4C2(CCN3)C(C1)O5
C1=CC2c3ccccc3OCC2CC1
C1=CC2CC1CC2C(CCN1CCCCC1)c1ccccc1
C1=Cc2ccccc2C(=C2CCNCC2)c2ccccc21
C1=Cc2ccccc2C1=Cc1ccccc1
C1=Cc2ccccc2Cc2ccccc21
C1=Cc2ccccc2Nc2ccccc21
C1=Cc2ccccc2Sc2ccccc21
C1=CCC(c2ccccc2)CC1
C1=CCCCC1
C1=COC(OC2CCCC(OC3CCCCO3)C2)CC1
C1=COCCC1
C1=Nc2ccccc2C(c2ccccc2)=[NH+]C1
c1c[nH]cn1
c1c[nH+]ccn1
C1C2CC3CC1CC(C2)C3
c1cc(N2CCCCC2)nc[nH+]1
c1cc(OC2CCCC2)cc(C2CCCCC2)c1
c1cc[n+](COC[n+]2ccccc2)cc1
C1CC[NH+](C2CCC3CCC4C5CC([NH+]6CCCCC6)CC5CCC4C3C2)CC1
c1cc[nH+]cc1
c1cc2c3c(c1)OC1CCCC4C(C2)N(CC2CCC2)CCC314
c1cc2c3c(c1)OC1CCCC4C(C2)NCCC314
c1cc2cc(c1)Oc1ccc3c(c1)C(Cc1ccc(cc1)Oc1cccc4c1C(C2)[NH2+]CC4)[NH2+]CC3
C1CC2OCCC2O1
c1ccc(C(=C2CC[NH2+]CC2)c2ccccc2)cc1
c1ccc(C(c2ccccc2)N2CCN(c3ncncn3)CC2)cc1
c1ccc(C(c2ccccc2)n2cncn2)cc1
c1ccc(C(CCN2CCCC2)C2CCCCC2)cc1
c1ccc(C(CCN2CCCCC2)C2CCCCC2)cc1
c1ccc(C(Cn2cncn2)Cn2cncn2)cc1
c1ccc(C[NH2+]CCOc2ccccc2)cc1
c1ccc(C2(Cn3ccnc3)OCC(COc3ccc(N4CCNCC4)cc3)O2)cc1
c1ccc(C2=NCc3[nH+]ncn3-c3ccccc32)cc1
c1ccc(C2=NCc3cncn3-c3ccccc32)cc1
c1ccc(C2=NCc3nncn3-c3ccccc32)cc1
c1ccc(-c2c[nH]c3ccccc23)cc1
c1ccc(C2CC2)cc1
c1ccc(C2CC3CCC2C3)cc1
c1ccc(-c2ccc(Cn3cnc4ccc(-c5nc6ccccc6[nH]5)cc43)cc2)cc1
c1ccc(C2CCC2)cc1
c1ccc(C2CCCC2)cc1
c1ccc(C2CCCCC2)cc1
c1ccc(-c2ccccc2)cc1
c1ccc(-c2ccccc2-c2nnn[nH]2)cc1
c1ccc(C2CCCCNC2)cc1
c1ccc(-c2cccnc2-c2cccnc2)cc1
c1ccc(-c2ccnc3ccnn23)cc1
c1ccc(C2CCNCC2)cc1
c1ccc(C2CCNCC2COc2ccc3c(c2)OCO3)cc1
c1ccc(-c2cn3ccccc3n2)cc1
c1ccc(C2CN3CCSC3=N2)cc1
c1ccc(-c2cncnn2)cc1
c1ccc(-c2ncoc2-c2ccccc2)cc1
c1ccc(-c2nnn[nH]2)c(-c2ccc(Cn3ccnc3)cc2)c1
c1ccc(C2OCc3ccccc32)cc1
c1ccc(C2OCCNCc3ccccc32)cc1
c1ccc(CC2=NCCN2)cc1
c1ccc(Cc2ccccc2)cc1
c1ccc(CC2CCCCN2)cc1
c1ccc(Cc2cncnc2)cc1
c1ccc(Cc2nccc3ccccc23)cc1
c1ccc(CCc2ccccc2)cc1
c1ccc(CCCCN2CCC(C(c3ccccc3)c3ccccc3)CC2)cc1
c1ccc(CCCCNCCc2ccccc2)cc1
c1ccc(CCCNCCc2ccccc2)cc1
c1ccc(CCN2CCC(Nc3nc4ccccc4n3Cc3ccccc3)CC2)cc1
c1ccc(CCn2cncn2)cc1
c1ccc(CCNCCc2ccccc2)cc1
c1ccc(CCNCCOc2ccccc2)cc1
c1ccc(CCOc2ccccc2)cc1
c1ccc(CCOCC2CC2)cc1
c1ccc(CN(CCN2CCCC2)c2ccccc2)cc1
c1ccc(CN2CCc3sccc3C2)cc1
c1ccc(Cn2cncn2)cc1
c1ccc(Cn2ncc3ccccc32)cc1
c1ccc(CNC2CCCCC2)cc1
c1ccc(COC(Cn2ccnc2)c2ccccc2)cc1
c1ccc(COC2CCCC(COC3CCCCO3)O2)cc1
c1ccc(COc2ccccc2)cc1
c1ccc(N=C2NCCN2)cc1
c1ccc(N=Nc2cccnc2)cc1
c1ccc(Nc2ccccc2)cc1
c1ccc(Nc2ccccn2)cc1
c1ccc(Nc2ccncc2)cc1
c1ccc(NCc2ccco2)cc1
C1CCC(OC2CCCC(OC3CCCCO3)C2)OC1
c1ccc(Oc2ccccc2)cc1
c1ccc(Oc2ccccc2N2CCCC2)cc1
C1CCC(OC2CCOC2)OC1
C1CCC(OC2COC(OC3CCCCC3OC3CCCCO3)C2)OC1
C1CCC(OC2OCCC2OC2CCCCO2)CC1
C1CCC(OCC2CCCC(OC3CCCO3)O2)OC1
c1ccc(OCC2CNCCO2)cc1
c1ccc(OCCCCCOc2ccccc2)cc1
c1ccc(OCCNCCOCc2cccc3[nH]c4ccccc4c23)cc1
C1CCC2(CC1)OCCO2
c1ccc2[nH]c(C3CCNCC3)cc2c1
c1ccc2[nH]c(-c3cscn3)nc2c1
c1ccc2[nH]ccc2c1
c1ccc2c(c1)C1CCC2c2ccccc21
c1ccc2c(c1)CC1CC2CCN1
c1ccc2c(c1)Cc1ccccc1N1CCNCC21
c1ccc2c(c1)Cc1ccccc1O2
c1ccc2c(c1)CC1CCCNC1C2
c1ccc2c(c1)CCC(CCNCCCc1nc3ccccc3[nH]1)C2
c1ccc2c(c1)CCC1C2CCC2CCCC21
c1ccc2c(c1)CCc1ccccc1N2
c1ccc2c(c1)CCc1cccnc1C2=C1CCNCC1
c1ccc2c(c1)CCc1sccc1C2=C1CCNCC1
c1ccc2c(c1)CCCC2
c1ccc2c(c1)CCCN2
c1ccc2c(c1)N=C(N1CCNCC1)c1ccccc1N2
c1ccc2c(c1)N=C(N1CCNCC1)c1ccccc1O2
c1ccc2c(c1)N=C(N1CCNCC1)c1ccccc1S2
c1ccc2c(c1)Nc1ccccc1S2
c1ccc2c(c1)OCCO2
c1ccc2c(c1)Sc1ccccc1N2CCCN1CCNCC1
c1ccc2c(CC3CC4CCN3CC4)ccnc2c1
c1ccc2c(CC3CCCCN3)ccnc2c1
c1ccc2c3c([nH]c2c1)COCC3
c1ccc2cc(CCCC3CCCO3)ccc2c1
c1ccc2ccccc2c1
c1ccc2cnncc2c1
c1ccc2nc3c(cc2c1)CCCC3
C1CCC2NCCC2C1
c1ccc2ncccc2c1
c1ccc2oncc2c1
c1ccc2sccc2c1
c1ccc2scnc2c1
c1ccccc1
C1CCN(C2CCC3CCC4C5CC([NH+]6CCCCC6)CC5CCC4C3C2)CC1
c1ccncc1
C1CCOCC1
c1cnc2ncnn2c1
c1cncc(C2CCCN2)c1
c1cnccn1
c1cncnc1
C1COCCN1
c1cscn1
c1nc(N2CCCCC2)c2ncnc(N3CCCCC3)c2n1
c1nc2c(s1)CCCC2
c1ncc(NC2=NCCN2)cn1
c1ncc2cn[nH]c2n1
c1ncc2nc[nH]c2n1
c1ncn(Cc2ccc3[nH]ccc3c2)n1
c1nncs1
c1nsnc1N1CCOCC1
C1OC2COC3OCOC3C2O1
N=C(C(=O)NC1C(=O)N2C=C(C[n+]3ccccc3)CSC12)c1cscn1
N=C(C(=O)NC1C(=O)N2C=C(CSc3nc(=O)c(=O)[nH][nH]3)CSC12)c1cscn1
N=C(C(=O)NC1C(=O)N2C=C(CSc3nccs3)CSC12)c1cscn1
N=C(C(=O)NC1C(=O)N2C=CCSC12)c1cscn1
N=C(C(=O)NC1CNC1=O)c1cscn1
N=C(NCCCCNC(=N)NC(=N)Nc1ccccc1)NC(=N)Nc1ccccc1
N=C1C=C2CCC3C4CCCC4CCC3C2CC1
N=C1CCCC(c2ccccc2)C1
N=c1ccn2c(n1)OC1CCOC12
O=[PH]1NCCCO1
O=[SH]1=NC=Nc2ccccc21
O=C(c1ccccc1)c1ccc[nH]1
O=C(c1ccccc1)c1ccc2n1CCC2
O=C(c1ccccc1)c1ccc2nc[nH]c2c1
O=C(c1ccccc1)c1ccccc1
O=C(c1ccccc1)C1CCN(CCn2c(=O)[nH]c3ccccc3c2=O)CC1
O=C(c1ccccc1)c1coc2ccccc12
O=C(C1CCCCC1)N1CC(=O)N2CCc3ccccc3C2C1
O=C(c1ccccc1)n1ccc2ccccc21
O=C(C1CCCO1)N1CCN(c2ncc3ccccc3n2)CC1
O=C(c1ccncc1)c1c[nH]c(=O)[nH]1
O=C(C1COc2ccccc2O1)N1CCN(c2ncc3ccccc3n2)CC1
O=C(CC[NH+]1CCc2ccccc2C1Cc1ccccc1)OCCCCCOC(=O)CC[NH+]1CCc2ccccc2C1Cc1ccccc1
O=C(CC1=CCC=CC1)NC1C(=O)N2C=CCSC12
O=C(Cc1ccccc1)NC1C(=O)N2C=C(CSc3nnn[nH]3)COC12
O=C(Cc1ccccc1)NCc1ccccc1N1CCCCC1
O=C(Cc1ccccc1)OC1CC2[NH2+]C(C1)C1OC21
O=C(Cc1ccccc1)OC1CC2CCC(C1)[NH2+]2
O=C(Cc1ccccc1)OC1CC2CCC(C1)N2
O=C(Cc1ccccc1)OC1CC2NC(C1)C1OC21
O=C(Cc1cccnc1)c1cccnc1
O=C(Cc1ccsc1)NC1C(=O)N2CCSC12
O=C(CCC=CCCC(=O)OCCC[NH+]1CCc2ccccc2C1Cc1ccccc1)OCCC[NH+]1CCc2ccccc2C1Cc1ccccc1
O=C(CCc1ccccc1)c1ccccc1
O=C(CCCN1CCC(c2ccccc2)CC1)c1ccccc1
O=C(CCN1CCOCC1)N1c2ccccc2Sc2ccccc21
O=C(CCNCCc1ccccc1)c1ccccc1
O=C(CNCCCc1ccccc1)N1CCC2CCCC21
O=C(CNCCCc1ccccc1)N1CCC2CCCCC21
O=C(CNCCCc1ccccc1)N1CCc2ccccc2C1
O=C(COCCOCCOCC(=O)Nc1ccccc1)Nc1ccccc1
O=C(N1CCCC1)C(CCN1CCOCC1)(c1ccccc1)c1ccccc1
O=C(NC1C(=O)N2CCSC12)C(NC(=O)N1CCNC1=O)c1ccccc1
O=C(NC1C(=O)N2CCSC12)c1conc1-c1ccccc1
O=C(NC1CC2CCC1C2)NS(=O)(=O)c1ccccc1
O=C(NC1CC2CCCC(C1)N2)c1n[nH]c2ccccc12
O=C(Nc1ccc(S(=O)(=O)Nc2nccs2)cc1)c1ccccc1
O=C(Nc1cccc(Nc2nccc(-c3cccnc3)n2)c1)c1ccc(CN2CCNCC2)cc1
O=C(NC1CCCCC1)NS(=O)(=O)c1ccc(CCN2C(=O)Cc3ccccc3C2=O)cc1
O=C(NC1CCCCC1)NS(=O)(=O)c1ccc(CCNC(=O)c2ccccc2)cc1
O=C(NC1CCCCC1)NS(=O)(=O)c1ccc(CCNC(=O)c2cnccn2)cc1
O=C(NC1CCCCC1)NS(=O)(=O)c1ccc(CCNC(=O)N2CC=CC2=O)cc1
O=C(NC1CCCCC1)NS(=O)(=O)c1ccccc1
O=C(Nc1ccccn1)C1=Cc2ccccc2S(=O)(=O)N1
O=C(Nc1ccccn1)C1=Cc2sccc2S(=O)(=O)N1
O=C(NC1CCN(CCCOc2ccccc2)CC1)c1ccccc1
O=C(Nc1ccon1)C1=Cc2ccccc2S(=O)(=O)N1
O=C(Nc1nccs1)C1=Cc2ccccc2S(=O)(=O)N1
O=C(NC1OC2C3CCCN3C(=O)C(Cc3ccccc3)N2C1=O)C1C=C2c3cccc4[nH]cc(c34)CC2NC1
O=C(NC1OC2C3CCCN3C(=O)C(Cc3ccccc3)N2C1=O)C1CNC2Cc3c[nH]c4cccc(c34)C2C1
O=C(NCC1CCCCN1)c1ccccc1
O=C(NCC1CCCCO1)C1CCCN1
O=C(NCC1CCCN1)c1ccccc1
O=C(NCCc1ccccc1)C1CCCCC1
O=C(NCCCCCCNC(=O)Oc1ccc[nH+]c1)Oc1ccc[nH+]c1
O=C(NCCN1CCOCC1)c1ccccc1
O=C(NN1CC2CCCC2C1)NS(=O)(=O)c1ccccc1
O=C(NNCc1ccccc1)c1ccon1
O=C(OC1c2nccnc2C(=O)N1c1ccccn1)N1CCNCC1
O=C(OC1CC[NH2+]C1)C(c1ccccc1)C1CCCC1
O=C(OC1CC2CC3CC(C1)N2CC3=O)c1c[nH]c2ccccc12
O=C(OC1CC2CCC(C1)[N+]21CCCC1)C(c1ccccc1)c1ccccc1
O=C(OC1CC2CCC(C1)N2)c1c[nH]c2ccccc12
O=C(Oc1ccccc1)c1ccccc1
O=C(OC1CCNCC1)C(c1ccccc1)c1ccccc1
O=C(OCC1CCC[NH2+]1)C(c1ccccc1)c1ccccc1
O=C(OCCCCNCCc1ccccc1)c1ccccc1
O=C(OCCNCc1ccccc1)c1ccccc1C1C=CNC=C1
O=C1[N+](CCCN2CCN(c3ccccc3)CC2)=Nc2cccc[n+]21
O=c1[nH]c(=O)c2[nH]cnc2[nH]1
O=c1[nH]c(=O)c2c(ncn2CCCNCCc2ccccc2)[nH]1
O=c1[nH]c2ccccc2n1C1CCN(CCC(c2ccccc2)c2ccccc2)CC1
O=c1[nH]c2ccccc2n1CCCN1CCC(Nn2c(=O)[nH]c3ccccc32)CC1
O=c1[nH]c2ccccc2n1CCCN1CCN(C(c2ccccc2)c2ccccc2)CC1
O=c1[nH]c2ccccc2o1
O=c1[nH]cnc2ccccc12
O=c1[nH]ncn1-c1ccc(N2CCN(c3ccc(OCC4COC(Cn5cncn5)(c5ccccc5)O4)cc3)CC2)cc1
O=c1c(CCN2CCC(c3noc4ccccc34)CC2)cnc2n1CCCC2
O=C1C(CCS(=O)c2ccccc2)C(=O)N(c2ccccc2)N1c1ccccc1
O=C1C(NCCCc2ccccc2)CCCN2CCCCN12
O=C1C=C(C2CCC3C2CCC2C4CCC(OC5CCCCO5)CC4CCC23)CO1
O=C1C=C2C=CC3C4CCCC4CCC3C2C2CC12
O=C1C=C2C=CC3C4CCCC4CCC3C2CC1
O=C1C=C2CCC3C(=C2CC1)C(c1ccccc1)CC1CCCC13
O=C1C=C2CCC3C(=C2CC1)CCC1CCCC13
O=C1C=C2CCC3C(C=CC4CCCC43)C2CC1
O=C1C=C2CCC3C4C=CCC4CCC3C2CC1
O=C1C=C2CCC3C4CCCC4CCC3C2CC1
O=C1C=CC2C(=C1)CCC1C2CCC2C1CC1OCOC12
O=C1C=CC2C(=C1)CCC1C3CCCC3CCC21
O=C1C=CC2C(CCC3C4CCCC4CCC23)N1
O=C1C=CCC2CC3Cc4ccccc4C=C3C(=O)C12
O=C1c2c([nH]c3ccccc23)CCC1Cn1ccnc1
O=C1c2ccccc2C(=O)C1c1ccccc1
O=C1c2ccccc2C(=O)c2ccccc21
O=C1c2ccccc2C(Cc2ccccc2)NN1C1CCCNCC1
O=C1c2ccccc2CN1c1ccccc1
O=C1c2ccccc2COc2ccccc21
O=C1c2ccccc2NCN1c1ccccc1
O=C1CC(=O)[N-]C(=O)[N-]1
O=C1CC(=O)N(c2ccccc2)c2ccccc2N1
O=C1CC(=O)N(c2ccccc2)N1c1ccccc1
O=C1CC(=O)NC(=O)N1
O=C1CC(=O)OCC2OC(=O)N(CCCCn3cnc(-c4cccnc4)c3)C2CC(=O)CCCC(OC2CCCCO2)C1
O=C1CC(c2ccccc2)C(=O)N1
O=C1CC(c2ccccc2)Sc2ccccc2N1
O=c1cc(NCc2cccnc2)nc[nH]1
O=c1cc(NCCCN2CCN(c3ccccc3)CC2)[nH]c(=O)[nH]1
O=c1cc[nH]c(=S)[nH]1
O=c1cc[nH]c2cc(N3CCNCC3)ccc12
O=c1cc[nH]c2cc3occc(=O)c3cc12
O=c1cc[nH]c2ncccc12
O=c1cc[nH]n1-c1ccccc1
O=C1CC2(CCCC2)CC(=O)N1CCCCN1CCN(c2ncccn2)CC1
O=C1Cc2cc(CCN3CCN(c4nsc5ccccc45)CC3)ccc2N1
O=C1CC2CC(SC3CCCN3)=CN12
O=C1CC2CC=CN12
O=C1Cc2ccccc2C(=C2CCNCC2)c2ccsc21
O=C1Cc2ccccc2CCN1CCCNCCc1ccccc1
O=C1Cc2ccccc2N1
O=C1Cc2ccccc2Nc2ccccc21
O=C1CC2N1CCS2(=O)=O
O=C1CC2SCC(CSc3nnn[nH]3)=CN12
O=C1CCC(c2ccccc2)=NN1
O=C1CCC(c2ccccc2)C(=O)N1
O=C1CCC(c2cccnc2)N1
O=c1ccc(-c2ccncc2)c[nH]1
O=C1CCC2=C(CCC3C2CCC2CCCC23)C1
O=C1CCC2C3Cc4cccc5c4C2(CCN3)C1O5
O=C1CCC2C3Cc4cccc5c4C2(CCN3CC2CC2)C1O5
O=C1CCc2ccc(cc2)Oc2cc3cc(c2OC2OCCCC2OC2CCCCO2)Oc2ccc(cc2)CC2NC(=O)C(NC(=O)C3NC(=O)CN1)c1cccc(c1)-c1ccccc1CNC2=O
O=C1CCc2ccccc2N1
O=c1ccc2ccccc2o1
O=C1CCCC1
O=C1CCCc2ccccc21
O=C1CCCCCCCCCCCC2CCCC(CC(OC3CCCCO3)C=CC=CC=CC=CC=CC=CC=CCCCCO1)O2
O=C1CCCCOC(=O)CC(OC2CCCCO2)CC(OC2CCCCO2)CCC1
O=C1CCCN1
O=c1ccn(C2C=CCO2)c(=O)[nH]1
O=c1ccn(C2CC2)c2cc(N3CC4CCCNC4C3)ccc12
O=c1ccn(C2CC2)c2cc(N3CCNCC3)ccc12
O=c1ccn(-c2ccccc2)c2nc(N3CC4CC4C3)ccc12
O=c1ccn(C2CCCO2)c(=O)[nH]1
O=c1ccn2c3c(c(N4CCNCC4)ccc13)OCC2
O=C1CCN2CCc3ccccc3C2C1
O=C1CCON1
O=C1CN(N=Cc2ccc(-c3ccccc3)o2)C(=O)N1
O=C1CN(N=Cc2ccc(-c3ccccc3)o2)C(=O)N1CCCCN1CCNCC1
O=C1CN(N=Cc2ccco2)C(=O)N1
O=c1cn[nH]c2cc3c(cc12)OCO3
O=C1CN=C(c2ccccc2)c2ccccc2N1
O=C1CN=C(c2ccccn2)c2ccccc2N1
O=C1CN2C(=O)C=COC2(c2ccccc2)c2ccccc2N1
O=C1CN2Cc3ccccc3N=C2N1
O=C1CNC(=O)N1c1ccccc1
O=C1N(Cc2ccc(-c3ccccc3-c3nn[nH]n3)cc2)C=NC12CCCC2
O=c1n(CCOc2ccccc2)cnn1CCCN1CCN(c2ccccc2)CC1
O=C1N=CC(C(=O)c2ccccc2)=N1
O=C1NC(=O)C(C2=CCCCC2)C(=O)N1
O=C1NC(=O)C(c2ccccc2)(c2ccccc2)N1
O=C1NC(=O)C(c2ccccc2)C(=O)N1
O=C1NC(=O)c2cccc3cccc1c23
O=C1NC(c2ccccc2)c2ccccc21
O=c1nc2[nH]c3ccccc3nc-2c(=O)[nH]1
O=C1Nc2ccccc2C1=Cc1cccs1
O=C1NCc2cncn2-c2ccccc21
O=c1ncccn1C1CCCO1
O=c1ncccn1C1CSCO1
O=C1NCNC(=O)C1c1ccccc1
O=C1NS(=O)(=O)c2ccccc21
O=C1OC2(c3ccccc3Oc3ccccc32)c2ccccc21
O=C1OC2CC(CC=CC(OC3CCC(OC4CCCCO4)CO3)CC=CC=C3COC4CC=CC1C34)OC1(C2)CC2CCC2O1
O=c1oc2ccccc2cc1Cc1ccccc1
O=C1OCCN1c1ccc(N2CCOCC2)cc1
O=S(=O)(c1ccccc1)c1ccccc1
O=S(=O)(Cc1ccc2[nH]ccc2c1)N1CCCC1
O=S(=O)(Nc1ccccn1)c1ccc(N=Nc2ccccc2)cc1
O=S(=O)(Nc1ccncn1)c1ccccc1
O=S(=O)(Nc1ccno1)c1ccccc1
O=S(=O)(Nc1ccon1)c1ccccc1
O=S(=O)(Nc1ncccn1)c1ccccc1
O=S(=O)(Nc1nccs1)c1ccccc1
O=S(=O)(Nc1nncs1)c1ccccc1
O=S(Cc1ccccn1)c1nc2ccccc2[n-]1
O=S(Cc1ccccn1)c1nc2ccccc2[nH]1
O=S1(=O)NC(CC2CCCC2)Nc2ccccc21
O=S1(=O)NC(Cc2ccccc2)Nc2ccccc21
O=S1(=O)Nc2ccccc2Nc2ccccc21
O=S1(=O)NCNc2ccccc21
S=c1[nH]cc[nH]1
carbon skeleton-578
C(CCC1CCCC1)CCC1CCCC1
C(CCCC1CC2CCCCC2C1)CCC1CCC2CCCCC2C1
C(CCCC1CCCCC1)CCC1CCCCC1
C(CCCC1CCCCC1)CCCC1CCCCC1
C(CCCCC1CCCC2CC3CCCCC3C12)CCCC1CCCCC1
C1C2CC3CC1CC(C2)C3
C1CC(CC2CCC34C5CCCC3C2CC2CCCC(C5)C24)C1
C1CC2CC(C1)CC1CCCC3CCCC(CC4CCC(CC4)CC4CCCC5CCC(C2)CC54)C31
C1CC2CC3CCCC45C(CCCC34)CC(C1)C25
C1CC2CCC3CCCC3C2C1
C1CC2CCCC2C1
C1CCC(C(C2CCCCC2)C2CCCC2)CC1
C1CCC(C(C2CCCCC2)C2CCCCC2)CC1
C1CCC(C(CC2CCCC2)CC2CCCC2)CC1
C1CCC(C(CCC2CCCC2)C2CCCCC2)CC1
C1CCC(C2C3CCCCC3CCC3CCCC32)CC1
C1CCC(C2C3CCCCC3CCC3CCCCC32)CC1
C1CCC(C2CC2)CC1
C1CCC(C2CC3CCC2C3)CC1
C1CCC(C2CC3CCCC3C2)CC1
C1CCC(C2CC3CCCCC3C2)C1
C1CCC(C2CC3CCCCC3C2)CC1
C1CCC(C2CC3CCCCC3CC3CCCCC32)CC1
C1CCC(C2CCC(C(C3CCCCC3)C3CCCCC3)CC2)CC1
C1CCC(C2CCC(CC3CCC4CCC(C5CC6CCCCC6C5)CC43)CC2)CC1
C1CCC(C2CCC(CCC3CCC(CC4CCCC4)(C4CCCCC4)C3)CC2)CC1
C1CCC(C2CCC2)CC1
C1CCC(C2CCC3CCC4C5CC(C6CCCCC6)CC5CCC4C3C2)CC1
C1CCC(C2CCC3CCCC3C3CCCCC23)CC1
C1CCC(C2CCC3CCCCC32)CC1
C1CCC(C2CCCC(CC3CCCC3)C2)CC1
C1CCC(C2CCCC2)CC1
C1CCC(C2CCCC2C2CCCCC2)CC1
C1CCC(C2CCCC3C(C4CCCCC4)CCCC23)CC1
C1CCC(C2CCCC3CCCC32)CC1
C1CCC(C2CCCCC2)CC1
C1CCC(C2CCCCC2C2CCCC2)CC1
C1CCC(C2CCCCC2C2CCCCC2)CC1
C1CCC(C2CCCCC2CCC2CCC3CCCC3C2)CC1
C1CCC(C2CCCCC3CCCCC32)CC1
C1CCC(C2CCCCCC3CCCCC32)CC1
C1CCC(CC(C2CCCCC2)C2CCCCC2)CC1
C1CCC(CC(CCC2CCCC2)C2CCCCC2)CC1
C1CCC(CC2CCC(C3CCCCC3C3CCCC3)CC2)C1
C1CCC(CC2CCC(CC3CCCCC3)CC2)CC1
C1CCC(CC2CCC(CC3CCCCC3CC3CCCCC3)C2)CC1
C1CCC(CC2CCC3CCCC3C2)C1
C1CCC(CC2CCC3CCCC3C2)CC1
C1CCC(CC2CCC3CCCCC32)CC1
C1CCC(CC2CCCC(CC3CCCCC3)C2)CC1
C1CCC(CC2CCCC2)CC1
C1CCC(CC2CCCC2CC2CCCCC2)CC1
C1CCC(CC2CCCC3CCCCC32)CC1
C1CCC(CC2CCCCC2)CC1
C1CCC(CC2CCCCC2C2CCCC2)CC1
C1CCC(CCC(C2CCCCC2)C2CC3CCC2C3)CC1
C1CCC(CCC(C2CCCCC2)C2CCCCC2)CC1
C1CCC(CCC(CC2CCCC2)C2CCCCC2)CC1
C1CCC(CCC2CCC(CC3CC4CCCCC4C3CC3CCCCC3)CC2)CC1
C1CCC(CCC2CCCC(CC3CCCC3)C2)CC1
C1CCC(CCC2CCCC(CCC3CCCCC3)C2)CC1
C1CCC(CCC2CCCC2)CC1
C1CCC(CCC2CCCCC2)CC1
C1CCC(CCCC(C2CCCC2)C2CCCC2)CC1
C1CCC(CCCC2C3CCCCC3CC3CCCCC32)CC1
C1CCC(CCCC2CCC(C(C3CCCCC3)C3CCCCC3)CC2)CC1
C1CCC(CCCC2CCC3CCCCC3C2)C1
C1CCC(CCCC2CCCCC2)CC1
C1CCC(CCCCC2CC2)CC1
C1CCC(CCCCC2CCC(C(C3CCCCC3)C3CCCCC3)CC2)CC1
C1CCC(CCCCCC2CCCCC2)CC1
C1CCC2(CC1)CCCC2
C1CCC23C4CCCC2C(C1)CC1CCCC(C4)C13
C1CCC23CCCCC2CC2CCCC(C1)C23
C1CCC2C(C1)C1CCC2C2CCCCC21
C1CCC2C(C1)CC1CCC3CCCC2C31
C1CCC2C(C1)CC1CCCC2C1
C1CCC2C(C1)CC1CCCCC12
C1CCC2C(C1)CC1CCCCC1C1CCCCC21
C1CCC2C(C1)CCC1C3CCCC3CCC21
C1CCC2C(C1)CCC1CCCCC12
C1CCC2C(C1)CCCC2CC1CC2CCC1CC2
C1CCC2CC3CCCCC3CC2C1
C1CCC2CC3CCCCC3CCC2C1
C1CCC2CCCC2C1
C1CCC2CCCCC2C1
C1CCCC(C2CCCCC2)CC1
C1CCCC1
C1CCCCC1
CC(C)(C1CCCCC1)C1CCCCC1
CC(C)(CC1CCC2CCCC2C1)C1CCCC1
CC(C)(CC1CCCC1)C1CCCCC1
CC(C)(CC1CCCCC1)C1CCC(CCC2CCCCC2)CC1
CC(C)(CC1CCCCC1)C1CCCCC1
CC(C1CCC(C2CCC3CCCCC3C2)CC1)C1CCC2CCCCC2C1
CC(C1CCCC1)C(CCC1CCCCC1)(C1CCCCC1)C1CCCCC1
CC(C1CCCC1)C1CCC(C2CCC3CCCCC3C2)CC1
CC(C1CCCCC1)C1CCC2CCCC21
CC(C1CCCCC1)C1CCC2CCCC2C1
CC(C1CCCCC1)C1CCC2CCCCC21
CC(C1CCCCC1)C1CCCC1
CC(C1CCCCC1)C1CCCCC1
CC(CC1C(C)C2CC(CC3CCCCC3)CCC21)C(C)C1CCCC1
CC(CC1C(C)C2CC(CCC3CCCC3)CCC21)C(C)C1CCCC1
CC(CC1C(C)C2CCCC21)C1CCCC1C1CCCCC1
CC(CC1C(C)C2CCCCC21)C(C)C1CCCC1
CC(CC1C2CCCCC2C(C)C1C1CCCCC1)C1CCCCC1
CC(CC1CC2C3CCCC3C(C)C(CC3CCCCC3)C2C1C)C1CCC2CC3CCC4CCCC(C2C1)C43
CC(CC1CC2CCC(C1)C21CCCC1)C(C1CCCCC1)C1CCCCC1
CC(CC1CC2CCC(C2)C1)C1CCC2CCCCC21
CC(CC1CC2CCC1C2)CC(C)(C)C1CCCCC1
CC(CC1CC2CCCC(C2)C1)C1CCC2CCCCC21
CC(CC1CC2CCCC2C1)CC(C)(C)C1CCCCC1
CC(CC1CCC(C(C)(C)CC2CCCC2)CC1)C1CCCCC1
CC(CC1CCC(CCCCC2CCCCC2)CC1)C1CCCCC1
CC(CC1CCCC(CC2CCCC(C3CCCCC3)C2)C1)C1CCC(CC2CCCCC2)CC1
CC(CC1CCCC1)C(C1CCCCC1)C1CCCC1
CC(CC1CCCC1)C1CC2CCCCC2C(C)(C)C1
CC(CC1CCCC1)CC1C(C)C2CCCC21
CC(CC1CCCCC1)C(C1CCCCC1)C1CCCCC1
CC(CC1CCCCC1)C1CC2CCCC2C(C)(C)C1
CC(CC1CCCCC1)C1CC2CCCCC2C(C)(C)C1
CC(CC1CCCCC1)C1CC2CCCCC2C1
CC(CC1CCCCC1)C1CCCCC1
CC(CC1CCCCC1)CC(C)(C)C1CCC(CCC2C(C)CC3CCCCC3C2C)CC1
CC(CC1CCCCC1)CC(C)(C)C1CCC(CCCC(C)C2CCCC2C)CC1
CC(CC1CCCCC1)CC(C)(C)C1CCC(CCCC(C)C2CCCCC2)CC1
CC(CC1CCCCC1)CC(C)(C)C1CCCCC1
CC(CC1CCCCC1)CC1C(C)C2CC(CCC3CCCC3)CCC12
CC(CC1CCCCC1)CC1C(C)C2CCCCC21
CC(CC1CCCCC1)CC1CC2CC(C1)C1CC21
CC(CC1CCCCC1)CC1CC2CCC(C2)C1
CC(CCC1C(C)C(C2CCCCC2)C(C2CCCCC2)C1C)C1CCCCC1
CC(CCC1CCCC1)C(C1CCCCC1)C1CCCCC1
CC(CCC1CCCC1)C1CCCCC1
CC(CCC1CCCCC1)C1C2CCCCC2CC2CCCCC21
CC(CCC1CCCCC1)C1CCCC1
CC(CCC1CCCCC1)C1CCCCC1
CC(CCC1CCCCC1C1CCCCC1)CC1CCCCC1
CC(CCCC1CCC(C2CCCCC2)CC1)C1CCCCC1
CC(CCCC1CCCCC1)C1CCCC1
CC(CCCC1CCCCC1)C1CCCCC1
CC(CCCCCC1CCCCC1)C1CCC2CCCC21
CC(CCCCCC1CCCCC1)C1CCC2CCCCC21
CC(CCCCCC1CCCCC1)C1CCC2CCCCC2C1
CC(CCCCCC1CCCCC1)C1CCCCC1
CC(CCCCCC1CCCCC1)C1CCCCC1C1CCCCC1
CC(CCCCCCC(C)CC(C)CC1CCCCC1)CC(C)CC1CCCCC1
CC(CCCCCCC(C)CCCCC1CCC2CCCCC2C1CC1CCCCC1)CCCCC1CCC2CCCCC2C1CC1CCCCC1
CC(CCCCCCCC(C)CCC1CCC2CCCCC2C1CC1CCCCC1)CCC1CCC2CCCCC2C1CC1CCCCC1
CC(CCCCCCCCC(C)CC1CCCCC1)CC1CCCCC1
CC(CCCCCCCCC1CCCCC1)C1CCCCC1
CC(CCCCCCCCCC(C)CC1CCCCC1)CC1CCCCC1
CC1(C)CC(CC2CCCC2)CC2CCCCC21
CC1(C)CC(CC2CCCCC2)CC2CCCCC21
CC1(C)CC2CCCCC2CC2CCCCC21
CC1(C)CCCC2CCCCC21
CC1C(C2CCCCCC2)CC(CC2CCCCC2)C2CCCCC12
CC1C(CC2CCC(C3CCCCC3C3CCCC3)CC2)CCC12CCCC2
CC1C(CC2CCCC2)CCC2CC3CCCCC3C21
CC1C(CCC2CCC(C3CCC4CCCCC43)CC2)CCC2CCCCC21
CC1C(CCCC2CCC(C3CCCCC3)CC2)CC2CCCCC21
CC1C(CCCC2CCCCC2)CCC1CCCC1CCC(C2CCCCC2)CC1
CC1C(CCCCC2CCCCC2)CCCC2CCCCC21
CC1C2CCCCC2C(C)C1C1CCCCC1
CC1C2CCCCC2C(C)C2CCCCC12
CC1C2CCCCC2CC1C1CCCCC1
CC1C2CCCCC2CCC1C1CCCCC1
CC1C2CCCCC2CCC2CCCCC21
CC1CC(C(C)C2CCCCC2)CC2C1CCC1CCCCC12
CC1CC(C)(C)C2CCCCC12
CC1CC(C)C(C2CCCCC2)(C2CCCCC2)C1
CC1CC(C)C(C2CCCCC2)C(C)C1
CC1CC(C)C(C2CCCCC2)C1
CC1CC(C)C(C2CCCCC2)C1C1CCCCC1
CC1CC(C)C(C2CCCCC2)C2CCCCC2C1
CC1CC(C)C(CCC2CCC(C3CCCCC3)C2)C1
CC1CC(C)C(CCC2CCCC2)C1
CC1CC(C)C2C(CCCCCCC3CCCCC3)CCC2C1
CC1CC(C)C2CC3CCCCC3CC2C1
CC1CC(C)C2CCCC2C1
CC1CC(C)C2CCCC3CCCC1C32
CC1CC(C)CC(C)C1
CC1CC(C)CC(CCCCC2CCC(C3CCCCC3)CC2)C1
CC1CC(C2CCCCC2)C2CCCCC12
CC1CC(CCC2CCC(C3CCCCC3)C2)C(C)C1CCCCC1CCCCC1
CC1CC2(C3CCCCC3CC3CCCCC32)C2CCCCC12
CC1CC2(CCCC2)CC(C)C1CCCCC1CCC(C2CCCCC2)CC1
CC1CC2C1CCC2(C)C
CC1CC2C3CC(CC(C)C4CCC5CCCCC54)CC2CC1C3
CC1CC2CC(C)C2C1
CC1CC2CC(CC3CCCC3)CC12
CC1CC2CC(CCCC(CC3CCC(CC4CCCCC4)CC3)CCCCC3CCC4CCCC1C34)CC1(C2)CC2CCC2C1
CC1CC2CC3CCCCC3CC2C1
CC1CC2CCC(CCC3CCC(C4CCC5CCCCC54)CC3)CC2C1
CC1CC2CCC(CCC3CCCC3)CC12
CC1CC2CCC34C2CC1C1CC2C5CCCCC5C56CCC7CC(C)C(CC75)C(CC(C5CCCCC53)C14)C26
CC1CC2CCC3C4CCCC4CCC3C2C2CC12
CC1CC2CCCC12
CC1CC2CCCC2C1
CC1CC2CCCC2C2CCC3CCCCC3C12
CC1CC2CCCCC2C(C)C1CCC1CCC(C(C)C2CCCCC2)CC1
CC1CC2CCCCC2C(C2CCCCC2)C2CCCC12
CC1CC2CCCCC2C1
CC1CC2CCCCC2C1C1CCC(CCC(C2CCCCC2)C2CCCCC2)CC1
CC1CC2CCCCC2C1CC1CCCC1
CC1CC2CCCCC2C1CCCC1CCC(C(C2CCCCC2)C2CCCCC2)CC1
CC1CC2CCCCC2C1CCCC1CCC(CC2C(C)CC3CCCCC32)CC1
CC1CC2CCCCC2C2(C3CCCCC3)CCCC(C)C2C1
CC1CC2CCCCC2CC(C2CCCCC2)C1
CC1CC2CCCCC2CC1CC1CCCCC1
CC1CC2CCCCC2CC2CCCCC12
CC1CC2CCCCC2CCC1CCCCCCC1CCCCC1
CC1CCC(C(C)C2CCCCC2)C1
CC1CCC(C)C1C1CCCCC1
CC1CCC(C)CC2C(C)CC3C(C)CC(CC4CCC(CC4)CC4CC2CC(CC2CCC(CC1)CC2)C4CC1CCCCC1CC1CCCCC1)C(C)CCC1CCCCC1C1CCCC3C1
CC1CCC(C2CC2)C2CC(C3CC4CCCCC4C3)CCC12
CC1CCC(C2CC2)C2CC(C3CCCCC3)CCC12
CC1CCC(C2CCC3C2CCC2C4CCC(CC5CCCCC5)CC4CCC23)C1
CC1CCC(C2CCCC2)C(C)C1
CC1CCC(C2CCCCC2)C(C)C1
CC1CCC(C2CCCCC2)C1
CC1CCC(C2CCCCC2)C2CC(C3CC4CC4C3)CCC12
CC1CCC(C2CCCCC2)C2CCCCC2C1
CC1CCC(C2CCCCC2)CC1
CC1CCC(CCC2CCC3C(C2)C(C)C3CC(C)C(C)C2CCCC2)CC1C
CC1CCC1CC(C)C(C)C1CCCC1
CC1CCC2C(C1)CC1CCCC12
CC1CCC2C(CCC3C2CCC2C4CCCC4CC23)C1
CC1CCC2C(CCC3C4CCCC4CC(C4CCCCC4)C23)C1
CC1CCC2C(CCC3C4CCCC4CCC23)C1
CC1CCC2C1CCC1C3CCCCC3CCC21
CC1CCC2C3CC4CCCC5CC1C2(CCC3CC1CC1)C45
CC1CCC2C3CCCC24C1CC1CCCC(C3)C14
CC1CCC2CC(C)C(CCCCC3CCC(C4CCCCC4)C3)C2CC(C)CCCC(CC2CCCCC2)CC(C)C1
CC1CCC2CCC3CCCCC3C2C1
CC1CCC2CCCC2C2CCCCC12
CC1CCC2CCCC3C(C4CCCCC4)CCC1C23
CC1CCC2CCCCC2C1
CC1CCCC(C)C1
CC1CCCC(C)C1C1CCCCC1
CC1CCCC(C2CCCCC2)C1
CC1CCCC(CCC2CCCCC2)C1
CC1CCCC1
CC1CCCC1C(C)CC(C(C)CC1C(C)C2CCCC21)C1CCCCC1
CC1CCCC1C1CCC(C2CCC(C3CCC(CCC4CCC(CC5CCCC5)(C5CCCCC5)C4)CC3)CC2)CC1
CC1CCCC1C1CCC(C2CCCCC2)CC1
CC1CCCC1C1CCCCC1
CC1CCCC2CC(C3CCCCC3)CCC12
CC1CCCC2CC3CC4CCCCC4CC3C(C)C12
CC1CCCC2CC3CCCC(C)C3CC12
CC1CCCC2CC3CCCC3CC12
CC1CCCC2CCCCC12
CC1CCCCC1
CC1CCCCC1C1CCCC1
CC1CCCCC1CCC1CCCC2CCCC21
CC1CCCCCC(C)CC(CC2CCCCC2)CC(CC2CCCCC2)CCC1
CC1CCCCCCCCCCCCCCCCCCCC(CC2CCCCC2)CC2CCCC(CCCCCCCCCCC1)C2
scaffold-970
C1CCC(OC2CCCC(OC3CCCCO3)C2)OC1
C(=C(c1ccccc1)c1ccccc1)c1ccccc1
C(=C1NCCc2ccccc21)c1ccccc1
C(=Cc1ccccc1)c1ccccc1
C(=Cc1ccccc1)CN1CCN(C(c2ccccc2)c2ccccc2)CC1
C(=Cc1cncn1Cc1ccccc1)Cc1cccs1
C(C=C1CCCC2CCCC12)=C1CCCCC1
C(CC[NH+]1CCCC1)CC[NH+]1CCCC1
C(CCN1CCCCC1)=C(c1cccs1)c1cccs1
C(CCN1CCNCC1)=C1c2ccccc2Sc2ccccc21
C(CN1CCCC1)=C(c1ccccc1)c1ccccn1
C=C1C(=O)CC2CC3Cc4ccccc4C=C3C(=O)C2C1=O
C=C1C[NH+]2CCC34c5ccccc5N5C=C6C7CC8[NH+](CCC89c8ccccc8N(C=C(C1CC23)C54)C69)CC7=C
C=C1c2ccccc2C=Cc2ccccc21
C=C1c2ccccc2CCc2ccccc21
C=C1c2ccccc2COc2ccccc21
C=C1c2ccccc2CSc2ccccc21
C=C1CC2CCCC2C1
C=C1CC2CCCC2C2CCC3=CCCCC3C12
C=C1CCC2C1CCC1C3CCCCC3CCC21
C=C1CCCC1n1cnc2c(=O)[nH]cnc21
C=C1CCCCC1=CC=C1CCCC2CCCC12
C=C1CN2C(=O)CC2O1
C=C1NC(=O)CNC(=O)CNC(=O)CCNC(=O)C(C2CCN=CN2)NC1=O
C=C1NC(=O)CNC(=O)CNC(=O)CCNC(=O)C(C2CCNC(=N)N2)NC1=O
C1=C2c3cccc4[nH]cc(c34)CC2NCC1
C1=C2CCC3C4CCCC4CCC3C2CCC1
C1=C2CCCCC2C2CCC3C(c4cccnc4)=CCC3C2C1
C1=CC(c2ccc[c+]3[nH]o[nH][c+]23)C=CN1
C1=CC(c2ccccc2)C=CN1
C1=CC(NC2CCC(OC3CCCOC3)OC2)CCC1
C1=CC=CN(C2=CC=CC=CCN2N2C=CC=CC=CC2)CC=C1
C1=CC2=CCC3C4CCCC4CCC3C2CC1
C1=CC2=CCCCC2CC1
C1=CC23CCNCc4cccc(c42)OC3CC1
C1=CC2C3Cc4cccc5c4C2(CCCN3)C(C1)O5
C1=CC2C3Cc4cccc5c4C2(CCN3)C(C1)O5
C1=CC2c3ccccc3OCC2CC1
C1=CC2CC1CC2C(CCN1CCCCC1)c1ccccc1
C1=Cc2ccccc2C(=C2CCNCC2)c2ccccc21
C1=Cc2ccccc2C1=Cc1ccccc1
C1=Cc2ccccc2Cc2ccccc21
C1=Cc2ccccc2Nc2ccccc21
C1=Cc2ccccc2Sc2ccccc21
C1=CCC(c2ccccc2)CC1
C1=CCCCC1
C1=COC(OC2CCCC(OC3CCCCO3)C2)CC1
C1=COCCC1
C1=Nc2ccccc2C(c2ccccc2)=[NH+]C1
c1c[nH]cn1
c1c[nH+]ccn1
C1C2CC3CC1CC(C2)C3
c1cc(N2CCCCC2)nc[nH+]1
c1cc(NC2=NCCN2)c2nsnc2c1
c1cc(OC2CCCC2)cc(C2CCCCC2)c1
c1cc[n+](COC[n+]2ccccc2)cc1
C1CC[NH+](C2CCC3CCC4C5CC([NH+]6CCCCC6)CC5CCC4C3C2)CC1
c1cc[nH+]cc1
c1cc2c(c3c1CCC3)CCO2
c1cc2c3c(c[nH]c3c1)CC1NCCCC21
c1cc2c3c(c1)OC1CCCC4C(C2)N(CC2CCC2)CCC314
c1cc2c3c(c1)OC1CCCC4C(C2)NCCC314
c1cc2cc(c1)Oc1ccc3c(c1)C(Cc1ccc(cc1)Oc1cccc4c1C(C2)[NH2+]CC4)[NH2+]CC3
C1CC2OCCC2O1
c1ccc(C(=C2CC[NH2+]CC2)c2ccccc2)cc1
c1ccc(C(c2ccccc2)N2CCN(c3ncncn3)CC2)cc1
c1ccc(C(c2ccccc2)N2CCNCC2)cc1
c1ccc(C(c2ccccc2)n2cncn2)cc1
C1CCC(C(CC2CCCCN2)C2CCCCC2)CC1
c1ccc(C(Cc2ccncn2)Cn2cncn2)cc1
c1ccc(C(CCCN2CCCCC2)c2ccccn2)cc1
c1ccc(C(CCN2CCCC2)C2CCCCC2)cc1
c1ccc(C(CCN2CCCCC2)C2CCCCC2)cc1
c1ccc(C(Cn2cncn2)Cn2cncn2)cc1
c1ccc(C(OCCC2CCCN2)c2ccccc2)cc1
c1ccc(C[NH2+]CCOc2ccccc2)cc1
c1ccc(C2(c3ccccc3)CC2C2=NCCN2)cc1
c1ccc(C2(Cn3ccnc3)OCC(COc3ccc(N4CCNCC4)cc3)O2)cc1
c1ccc(C2(N3CCCCC3)CCCCC2)cc1
c1ccc(C2=NCc3[nH+]ncn3-c3ccccc32)cc1
c1ccc(C2=NCc3cncn3-c3ccccc32)cc1
c1ccc(C2=NCc3nncn3-c3ccccc32)cc1
c1ccc(-c2c[nH]c3ccccc23)cc1
c1ccc(C2c3ccccc3C3=NCCN32)cc1
c1ccc(C2CC2)cc1
c1ccc(C2CC2Nc2ncnc3c2nnn3C2CCCC2)cc1
c1ccc(C2CC3CCC2C3)cc1
c1ccc(-c2ccc(Cn3cnc4ccc(-c5nc6ccccc6[nH]5)cc43)cc2)cc1
c1ccc(C2CCC2)cc1
c1ccc(C2CCCC2)cc1
c1ccc(C2CCCc3ccccc32)cc1
c1ccc(C2CCCCC2)cc1
c1ccc(-c2ccccc2)cc1
c1ccc(-c2ccccc2-c2nnn[nH]2)cc1
c1ccc(C2CCCCNC2)cc1
c1ccc(-c2cccnc2-c2cccnc2)cc1
c1ccc(C2CCN(CCC(c3ccccc3)c3ccccc3)CC2)cc1
c1ccc(-c2ccnc3ccnn23)cc1
c1ccc(C2CCNCC2)cc1
c1ccc(C2CCNCC2COc2ccc3c(c2)OCO3)cc1
c1ccc(-c2ccnn2-c2ccccc2)cc1
c1ccc(-c2cn3ccccc3n2)cc1
c1ccc(C2CN3CCSC3=N2)cc1
c1ccc(-c2cnc3ncncc3n2)cc1
c1ccc(C2CNCc3ccccc32)cc1
c1ccc(-c2cncnc2)cc1
c1ccc(-c2cncnn2)cc1
c1ccc(-c2cnn(-c3ccccc3)c2)cc1
c1ccc(-c2conc2-c2ccccc2)cc1
c1ccc(-c2nccs2)cc1
c1ccc(-c2ncoc2-c2ccccc2)cc1
c1ccc(-c2nnn[nH]2)c(-c2ccc(Cn3ccnc3)cc2)c1
c1ccc(C2OCc3ccccc32)cc1
c1ccc(C2OCCNCc3ccccc32)cc1
c1ccc(CC2=NCCN2)cc1
c1ccc(Cc2ccccc2)cc1
c1ccc(Cc2ccccn2)cc1
c1ccc(Cc2cncnc2)cc1
c1ccc(Cc2nccc3ccccc23)cc1
c1ccc(CCc2ccccc2)cc1
c1ccc(CCCCN2CCC(C(c3ccccc3)c3ccccc3)CC2)cc1
c1ccc(CCCCNCCc2ccccc2)cc1
c1ccc(CCCN2CCC(c3ccccc3)CC2)cc1
c1ccc(CCCNCc2cccc3ccccc23)cc1
c1ccc(CCCNCCc2ccccc2)cc1
c1ccc(CCN2CCC(Nc3nc4ccccc4n3Cc3ccccc3)CC2)cc1
c1ccc(CCn2cncn2)cc1
c1ccc(CCNCCc2ccccc2)cc1
c1ccc(CCNCCOc2ccccc2)cc1
c1ccc(CCOc2ccccc2)cc1
c1ccc(CCOCC2CC2)cc1
c1ccc(CN(CCN2CCCC2)c2ccccc2)cc1
c1ccc(CN2CCc3sccc3C2)cc1
c1ccc(Cn2ccnn2)cc1
c1ccc(Cn2cncn2)cc1
c1ccc(Cn2ncc3ccccc32)cc1
c1ccc(CNC2CCCCC2)cc1
c1ccc(CNc2ccccn2)cc1
c1ccc(CNCCNCc2ccccc2)cc1
c1ccc(CNCCOc2ccccc2)cc1
c1ccc(COC(Cn2ccnc2)c2ccccc2)cc1
c1ccc(COC2CCCC(COC3CCCCO3)O2)cc1
c1ccc(COc2ccccc2)cc1
c1ccc(N=C2NCCN2)cc1
c1ccc(N=Nc2cccnc2)cc1
c1ccc(N2CCN(CCc3nnc4n3CCCC4)CC2)cc1
c1ccc(NC2Cc3ccccc3C2)cc1
c1ccc(Nc2ccccc2)cc1
c1ccc(Nc2ccccn2)cc1
c1ccc(NC2CCN(CCc3cccs3)CC2)cc1
c1ccc(Nc2ccnc(Nc3ccccc3)n2)cc1
c1ccc(Nc2ccncc2)cc1
c1ccc(Nc2nccc(Oc3ccccc3)n2)cc1
c1ccc(NCc2ccco2)cc1
c1ccc(NCc2cnc3ncncc3n2)cc1
c1ccc(OC(c2ccccc2)C2CNCCO2)cc1
C1CCC(OC2CCCC(OC3CCCCO3)C2)OC1
c1ccc(Oc2ccccc2)cc1
c1ccc(Oc2ccccc2N2CCCC2)cc1
C1CCC(OC2CCCO2)OC1
C1CCC(OC2CCOC2)OC1
C1CCC(OC2COC(OC3CCCCC3OC3CCCCO3)C2)OC1
C1CCC(OC2OCCC2OC2CCCCO2)CC1
c1ccc(OCC2=NCCN2)cc1
C1CCC(OCC2CCCC(OC3CCCO3)O2)OC1
c1ccc(OCC2CNCCO2)cc1
c1ccc(OCCCCCOc2ccccc2)cc1
c1ccc(OCCNCCOCc2cccc3[nH]c4ccccc4c23)cc1
c1ccc(OCCOCC2CC2)cc1
c1ccc(SCSc2ccccc2)cc1
C1CCC2(CC1)OCCO2
c1ccc2[nH]c(C3CCNCC3)cc2c1
c1ccc2[nH]c(-c3cscn3)nc2c1
c1ccc2[nH]ccc2c1
c1ccc2[nH]cnc2c1
c1ccc2c(c1)[nH]c1ccccc12
c1ccc2c(c1)C1CCC2c2ccccc21
c1ccc2c(c1)CC1CC2CCN1
c1ccc2c(c1)Cc1ccccc1-2
c1ccc2c(c1)Cc1ccccc1N1CCNCC21
c1ccc2c(c1)Cc1ccccc1O2
c1ccc2c(c1)CC1CCCNC1C2
c1ccc2c(c1)Cc1cccnc1N1CCNCC21
c1ccc2c(c1)CCC(CCNCCCc1nc3ccccc3[nH]1)C2
c1ccc2c(c1)CCC1C2CCC2CCCC21
C1CCC2C(C1)CCC1C3CCCC3CCC21
c1ccc2c(c1)CCc1ccccc1N2
c1ccc2c(c1)CCc1cccnc1C2=C1CCNCC1
c1ccc2c(c1)CCc1sccc1C2=C1CCNCC1
c1ccc2c(c1)CCCC2
c1ccc2c(c1)CCCN2
c1ccc2c(c1)CCCO2
c1ccc2c(c1)CCNCC2
c1ccc2c(c1)N=C(N1CCNCC1)c1ccccc1N2
c1ccc2c(c1)N=C(N1CCNCC1)c1ccccc1O2
c1ccc2c(c1)N=C(N1CCNCC1)c1ccccc1S2
c1ccc2c(c1)Nc1ccccc1C1OC21
c1ccc2c(c1)Nc1ccccc1S2
c1ccc2c(c1)NC1NCCC21
c1ccc2c(c1)OCC(C1=NCCN1)O2
c1ccc2c(c1)OCCO2
c1ccc2c(c1)Sc1ccccc1N2CCC1CCCCN1
c1ccc2c(c1)Sc1ccccc1N2CCCN1CCNCC1
c1ccc2c(CC3CC4CCN3CC4)ccnc2c1
c1ccc2c(Cc3cccc4ccccc34)cccc2c1
c1ccc2c(CC3CCCCN3)ccnc2c1
c1ccc2c(CCCC3CCCO3)cccc2c1
c1ccc2c(CCCCN3CCN(c4ccc5occc5c4)CC3)c[nH]c2c1
c1ccc2c3c([nH]c2c1)CCCC3
c1ccc2c3c([nH]c2c1)COCC3
c1ccc2cc(CCCC3CCCO3)ccc2c1
c1ccc2ccccc2c1
c1ccc2cnncc2c1
c1ccc2nc3c(cc2c1)CCCC3
C1CCC2NCCC2C1
c1ccc2ncccc2c1
c1ccc2occc2c1
c1ccc2oncc2c1
c1ccc2sccc2c1
c1ccc2scnc2c1
c1ccccc1
C1CCN(C2CCC3CCC4C5CC([NH+]6CCCCC6)CC5CCC4C3C2)CC1
C1CCNC1
c1ccncc1
c1ccoc1
C1CCOCC1
c1cn[nH]c1
c1cnc2cc3c(cc2n1)C1CNCC3C1
c1cnc2ncnn2c1
c1cncc(C2CCCN2)c1
c1cnccn1
c1cncnc1
C1CO1
C1COCCN1
c1csc(CNc2ccccc2-c2nn[nH]n2)c1
c1cscn1
c1nc(-c2cnn(CC3CCCC3)c2)c2cc[nH]c2n1
c1nc(N2CCCCC2)c2ncnc(N3CCCCC3)c2n1
c1nc2c(s1)CCCC2
c1nc2nc[nH]c(Sc3cnc[nH]3)c-2n1
c1ncc(NC2=NCCN2)cn1
c1ncc2cn[nH]c2n1
c1ncc2nc[nH]c2n1
c1ncc2ncn(C3CCCO3)c2n1
c1ncn(C2CCCO2)n1
c1ncn(Cc2ccc3[nH]ccc3c2)n1
c1ncncn1
c1nncs1
c1nsnc1N1CCOCC1
C1OC2COC3OCOC3C2O1
N=C(C(=O)NC1C(=O)N2C=C(C[n+]3ccccc3)CSC12)c1cscn1
N=C(C(=O)NC1C(=O)N2C=C(CSc3nc(=O)c(=O)[nH][nH]3)CSC12)c1cscn1
N=C(C(=O)NC1C(=O)N2C=C(CSc3nccs3)CSC12)c1cscn1
N=C(C(=O)NC1C(=O)N2C=CCSC12)c1ccco1
N=C(C(=O)NC1C(=O)N2C=CCSC12)c1cscn1
N=C(C(=O)NC1CNC1=O)c1cscn1
N=C(NCCCCNC(=N)NC(=N)Nc1ccccc1)NC(=N)Nc1ccccc1
N=c1c[n+](N2CCOCC2)[n-]o1
N=C1C=C2CCC3C4CCCC4CCC3C2CC1
N=C1CCCC(c2ccccc2)C1
N=c1ccn2c(n1)OC1CCOC12
O=[PH]1NCCCO1
O=[SH]1=NC=Nc2ccccc21
O=C(C[PH](=O)CCCCc1ccccc1)N1CCC(C2CCCCC2)C1
O=C(c1cc2ccccc2[nH]1)N1CCN(c2ccccn2)CC1
O=C(c1ccc(OCCN2CCCCC2)cc1)c1c(-c2ccccc2)sc2ccccc12
O=C(c1ccccc1)c1ccc[nH]1
O=C(c1ccccc1)c1ccc2n1CCC2
O=C(c1ccccc1)c1ccc2nc[nH]c2c1
O=C(c1ccccc1)c1ccccc1
O=C(c1ccccc1)c1cccs1
O=C(c1ccccc1)C1CCN(CCn2c(=O)[nH]c3ccccc3c2=O)CC1
O=C(c1ccccc1)c1coc2ccccc12
O=C(C1CCCCC1)N1CC(=O)N2CCc3ccccc3C2C1
O=C(c1ccccc1)n1ccc2ccccc21
O=C(c1ccco1)N1CCN(c2ncc3ccccc3n2)CC1
O=C(c1ccncc1)c1c[nH]c(=O)[nH]1
O=C(C1COc2ccccc2O1)N1CCN(c2ncc3ccccc3n2)CC1
O=C(CC[NH+]1CCc2ccccc2C1Cc1ccccc1)OCCCCCOC(=O)CC[NH+]1CCc2ccccc2C1Cc1ccccc1
O=C(CC1=CCC=CC1)NC1C(=O)N2C=CCSC12
O=C(CC12CC3CC(CC(C3)C1)C2)N1CCC2CC21
O=C(Cc1ccccc1)CC1C(=O)N2CCSC12
O=C(Cc1ccccc1)N(c1ccccc1)C1CCNCC1
O=C(Cc1ccccc1)NC1C(=O)N2C=C(CSc3cn[nH]n3)CSC12
O=C(Cc1ccccc1)NC1C(=O)N2C=C(CSc3nncs3)CSC12
O=C(Cc1ccccc1)NC1C(=O)N2C=C(CSc3nnn[nH]3)COC12
O=C(Cc1ccccc1)NC1C(=O)N2C=C(CSc3nnn[nH]3)CSC12
O=C(Cc1ccccc1)NC1C(=O)N2C=CCCC12
O=C(Cc1ccccc1)NC1C(=O)N2C=CCSC12
O=C(Cc1ccccc1)NC1C(=O)N2CCSC12
O=C(Cc1ccccc1)NCc1ccccc1N1CCCCC1
O=C(Cc1ccccc1)OC1CC2[NH2+]C(C1)C1OC21
O=C(Cc1ccccc1)OC1CC2CCC(C1)[NH2+]2
O=C(Cc1ccccc1)OC1CC2CCC(C1)N2
O=C(Cc1ccccc1)OC1CC2NC(C1)C1OC21
O=C(Cc1cccnc1)c1cccnc1
O=C(Cc1cccs1)NC1C(=O)N2C=CCSC12
O=C(Cc1ccsc1)NC1C(=O)N2CCSC12
O=C(CCC=CCc1ccc2c(c1)C(=O)OC2)OCCN1CCOCC1
O=C(CCC=CCCC(=O)OCCC[NH+]1CCc2ccccc2C1Cc1ccccc1)OCCC[NH+]1CCc2ccccc2C1Cc1ccccc1
O=C(CCC1(C(=O)NC2CCCCC2)CCCC1)Oc1ccc2c(c1)CCC2
O=C(CCc1ccccc1)c1ccccc1
O=C(CCc1ccccc1)N1CCCC1
O=C(CCCN1CCC(c2ccccc2)CC1)c1ccccc1
O=C(CCCN1CCCC1)c1ccccc1
O=C(CCN1CCOCC1)N1c2ccccc2Sc2ccccc21
O=C(CCNCCc1ccccc1)c1ccccc1
O=C(Cn1cnnn1)NC1C(=O)N2C=C(CSc3nncs3)CSC12
O=C(CNC(=O)C(Cc1ccc2ccccc2c1)NC(=O)C(Cc1ccccc1)NC(=O)CNC(=O)C(Cc1c[nH]c2ccccc12)NC(=O)C(Cc1cnc[nH]1)NC(=O)C1CCC(=O)N1)NCC(=O)N1CCCC1
O=C(CNC(=O)c1ccc2ccccc2n1)NC(CCN1CCC2CCCCC2C1)Cc1ccccc1
O=C(CNC(=O)CNC(=O)C(Cc1ccccc1)NC(=O)CNC(=O)C(Cc1c[nH]c2ccccc12)NC(=O)C(Cc1cnc[nH]1)NC(=O)C1CCC(=O)N1)NCC(=O)N1CCCC1
O=C(CNC12CC3CC(CC(C3)C1)C2)N1CCCC1
O=C(CNCCCc1ccccc1)N1CCC2CCCC21
O=C(CNCCCc1ccccc1)N1CCC2CCCCC21
O=C(CNCCCc1ccccc1)N1CCc2ccccc2C1
O=C(CNCCCc1ccccc1)N1CCCC1
O=C(CNCCCc1ccccc1)N1CCNC1=O
O=C(CNCCCc1ccccc1)NC1Cc2ccccc2C1
O=C(COc1ccccc1)NC1C(=O)N2CCSC12
O=C(COCCOCCOCC(=O)Nc1ccccc1)Nc1ccccc1
O=C(N1CCCC1)C(CCN1CCOCC1)(c1ccccc1)c1ccccc1
O=C(NC1C(=O)N2CCSC12)C(C(=O)Oc1ccccc1)c1ccccc1
O=C(NC1C(=O)N2CCSC12)C(NC(=O)N1CCNC1=O)c1ccccc1
O=C(NC1C(=O)N2CCSC12)c1conc1-c1ccccc1
O=C(NC1CC2CCC1C2)NS(=O)(=O)c1ccccc1
O=C(NC1CC2CCCC(C1)N2)c1n[nH]c2ccccc12
O=C(Nc1ccc(C(=O)N2CCc3[nH]cnc3-c3ccccc32)cc1)c1ccccc1-c1ccccc1
O=C(Nc1ccc(S(=O)(=O)Nc2nccs2)cc1)c1ccccc1
O=C(NC1CCc2ccccc21)C(CCCN1CCN(Cc2cccnc2)CC1)Cc1ccccc1
O=C(Nc1cccc(C(=O)Nc2cccc(C(=O)Nc3cccc4ccccc34)c2)c1)Nc1cccc(C(=O)Nc2cccc(C(=O)Nc3cccc4ccccc34)c2)c1
O=C(Nc1cccc(-c2ccccn2)c1)c1ccccc1
O=C(Nc1cccc(Nc2nccc(-c3cccnc3)n2)c1)c1ccc(CN2CCNCC2)cc1
O=C(Nc1cccc2c(=O)cc(-c3nn[nH]n3)oc12)c1ccc(OCCCCc2ccccc2)cc1
O=C(Nc1ccccc1)C1CC(SC2=CN3C(=O)CC3C2)CN1
O=C(Nc1ccccc1)c1cc2ccccc2[nH]c1=O
O=C(Nc1ccccc1)c1ccccc1
O=C(Nc1ccccc1)C1CCCCN1
O=C(Nc1ccccc1)c1cnoc1
O=C(NC1CCCCC1)NS(=O)(=O)c1ccc(CCN2C(=O)Cc3ccccc3C2=O)cc1
O=C(NC1CCCCC1)NS(=O)(=O)c1ccc(CCNC(=O)c2ccccc2)cc1
O=C(NC1CCCCC1)NS(=O)(=O)c1ccc(CCNC(=O)c2cnccn2)cc1
O=C(NC1CCCCC1)NS(=O)(=O)c1ccc(CCNC(=O)N2CC=CC2=O)cc1
O=C(NC1CCCCC1)NS(=O)(=O)c1ccccc1
O=C(Nc1ccccc1CCC1CCCCN1)c1ccccc1
O=C(Nc1ccccn1)C1=Cc2ccccc2S(=O)(=O)N1
O=C(Nc1ccccn1)C1=Cc2sccc2S(=O)(=O)N1
O=C(NC1CCN(CCCOc2ccccc2)CC1)c1ccccc1
O=C(Nc1ccon1)C1=Cc2ccccc2S(=O)(=O)N1
O=C(Nc1nccs1)C1=Cc2ccccc2S(=O)(=O)N1
O=C(NC1OC2C3CCCN3C(=O)C(Cc3ccccc3)N2C1=O)C1C=C2c3cccc4[nH]cc(c34)CC2NC1
O=C(NC1OC2C3CCCN3C(=O)C(Cc3ccccc3)N2C1=O)C1CNC2Cc3c[nH]c4cccc(c34)C2C1
O=C(NC1OC2C3CCCN3C(=O)CN2C1=O)C1C=C2c3cccc4[nH]cc(c34)CC2NC1
O=C(NC1OC2C3CCCN3C(=O)CN2C1=O)C1CNC2Cc3c[nH]c4cccc(c34)C2C1
O=C(NCc1ccccc1)c1ccccc1
O=C(NCc1ccccc1)C1CCN1C(=O)CC1CCCCC1
O=C(NCC1CCCCN1)c1ccccc1
O=C(NCC1CCCCO1)C1CCCN1
O=C(NCC1CCCN1)c1ccc2[nH]nnc2c1
O=C(NCC1CCCN1)c1ccccc1
O=C(NCCC1CCC1)C1NCC2CC21
O=C(NCCc1ccccc1)C1CCCCC1
O=C(NCCCCCCNC(=O)Oc1ccc[nH+]c1)Oc1ccc[nH+]c1
O=C(NCCN1CCOCC1)c1ccccc1
O=C(NCCNCCCOc1ccccc1)N1CCOCC1
O=C(NN1CC2CCCC2C1)NS(=O)(=O)c1ccccc1
O=C(NN1CCc2ccccc21)c1ccccc1
O=C(NN1CCCCC1)c1ccccc1
O=C(NNCc1ccccc1)c1ccon1
O=C(OC1c2nccnc2C(=O)N1c1ccccn1)N1CCNCC1
O=C(OC1CC[NH2+]C1)C(c1ccccc1)C1CCCC1
O=C(OC1CC2CC3CC(C1)N2CC3=O)c1c[nH]c2ccccc12
O=C(OC1CC2CCC(C1)[N+]21CCCC1)C(c1ccccc1)c1ccccc1
O=C(OC1CC2CCC(C1)N2)c1c[nH]c2ccccc12
O=C(OC1CCC2CC3c4[nH]c5ccccc5c4CCN3CC2C1)c1ccccc1
O=C(Oc1ccccc1)c1ccccc1
O=C(OC1CCNCC1)C(c1ccccc1)c1ccccc1
O=C(OC1CN2CCC1CC2)N1CCc2ccccc2C1c1ccccc1
O=C(OCC1CCC[NH2+]1)C(c1ccccc1)c1ccccc1
O=C(OCCCCNCCc1ccccc1)c1ccccc1
O=C(OCCN1CCN(c2ccccc2)CC1)c1ccccc1Nc1ccnc2ccccc12
O=C(OCCNCc1ccccc1)c1ccccc1C1C=CNC=C1
O=C(OCCNCCC(c1ccccc1)c1ccccc1)C1=CNC=CC1c1ccccc1
O=C1[N+](CCCN2CCN(c3ccccc3)CC2)=Nc2cccc[n+]21
O=c1[nH]c(=O)c2[nH]cnc2[nH]1
O=c1[nH]c(=O)c2c(ncn2CCCNCCc2ccccc2)[nH]1
O=c1[nH]c2ccccc2n1C1CCN(CCC(c2ccccc2)c2ccccc2)CC1
O=c1[nH]c2ccccc2n1CCCN1CCC(Nn2c(=O)[nH]c3ccccc32)CC1
O=c1[nH]c2ccccc2n1CCCN1CCN(C(c2ccccc2)c2ccccc2)CC1
O=c1[nH]c2ccccc2o1
O=c1[nH]cc2ncnc-2[nH]1
O=c1[nH]cnc2ccccc12
O=c1[nH]ncn1-c1ccc(N2CCN(c3ccc(OCC4COC(Cn5cncn5)(c5ccccc5)C4)cc3)CC2)cc1
O=c1[nH]ncn1-c1ccc(N2CCN(c3ccc(OCC4COC(Cn5cncn5)(c5ccccc5)O4)cc3)CC2)cc1
O=c1[nH]nnc2cncn12
O=c1[nH]nnn1CCN1CCC(Nc2ccccc2)CC1
O=C1C(=O)c2ccccc2C=C1C1CCC(c2ccccc2)CC1
O=C1C(CCCc2ccccc2)C(c2ccccc2)N1c1ccccc1
O=c1c(CCN2CCC(c3noc4ccccc34)CC2)cnc2n1CCCC2
O=C1C(CCS(=O)c2ccccc2)C(=O)N(c2ccccc2)N1c1ccccc1
O=C1C(N=CN2CCCCCC2)C2SCCN12
O=C1C(NCCCc2ccccc2)CCCN2CCCCN12
O=C1C=C(C2CCC3C2CCC2C4CCC(OC5CCC(OC6CCC(OC7CCCCO7)CO6)CO5)CC4CCC23)CO1
O=C1C=C(C2CCC3C2CCC2C4CCC(OC5CCC(OC6CCCC(COC7CCCCO7)O6)CO5)CC4CCC23)CO1
O=C1C=C(C2CCC3C2CCC2C4CCC(OC5CCCCO5)CC4CCC23)CO1
O=C1C=C2C=CC3C4CCCC4CCC3C2C2CC12
O=C1C=C2C=CC3C4CCCC4CCC3C2CC1
O=C1C=C2C3CCCCC3CCC2C2CCC3CCCCC3C12
O=C1C=C2CCC3C(=C2CC1)C(c1ccccc1)CC1CCCC13
O=C1C=C2CCC3C(=C2CC1)C=CC1CCCC13
O=C1C=C2CCC3C(=C2CC1)CCC1CCCC13
O=C1C=C2CCC3C(C=CC4CCCC43)C2CC1
O=C1C=C2CCC3C(CCC4C3CCC43CCC(=O)O3)C2CC1
O=C1C=C2CCC3C4C=CCC4CCC3C2CC1
O=C1C=C2CCC3C4CCCC4CC(=O)C3C2CC1
O=C1C=C2CCC3C4CCCC4CCC3C2CC1
O=C1C=CC(=NNc2ccc(S(=O)(=O)Nc3ccccn3)cc2)C=C1
O=C1C=CC(=NNc2ccccc2)C=C1
O=C1C=CC=CC1=Cc1ccccc1
O=C1C=CC=CCCCCCCCCC=COC2Oc3ccc4c(c3C2=O)C2=NC3(CCNCC3)NC2=C(N1)C4=O
O=C1C=CC=CCCCCCCCCC=COC2Oc3ccc4cc(c(C=NN5CCNCC5)cc4c3C2=O)N1
O=C1C=CC2C(=C1)CCC1C2CCC2C1CC1OCOC12
O=C1C=CC2C(=C1)CCC1C3CCCC3CCC21
O=C1C=CC2C(CCC3C4CCCC4CCC23)N1
O=C1C=CCC2CC3Cc4ccccc4C=C3C(=O)C12
O=C1C=COC1
O=C1C2=CC3C(=O)C=CCC3CC2Cc2ccccc21
O=C1c2c([nH]c3ccccc23)CCC1Cn1ccnc1
O=C1c2cccc3c2C(CCC3)CN1C1CN2CCC1CC2
O=C1c2ccccc2C(=O)C1c1ccccc1
O=C1c2ccccc2C(=O)c2cc3c(cc21)CCCC3OC1CCCCO1
O=C1c2ccccc2C(=O)c2ccccc21
O=C1c2ccccc2C(C2c3ccccc3C(=O)c3c(OC4CCCCO4)cccc32)c2cccc(OC3CCCCO3)c21
O=C1c2ccccc2C(Cc2ccccc2)NN1C1CCCNCC1
O=C1c2ccccc2CN1c1ccccc1
O=C1c2ccccc2COc2ccccc21
O=C1c2ccccc2NCN1c1ccccc1
O=C1CC(=O)[N-]C(=O)[N-]1
O=C1CC(=O)N(c2ccccc2)c2ccccc2N1
O=C1CC(=O)N(c2ccccc2)N1c1ccccc1
O=C1CC(=O)NC(=O)N1
O=C1CC(=O)OCC2OC(=O)N(CCCCn3cnc(-c4cccnc4)c3)C2CC(=O)CCCC(OC2CCCCO2)C1
O=C1CC(c2ccccc2)C(=O)N1
O=C1CC(c2ccccc2)Sc2ccccc2N1
O=c1cc(N2CCCCC2)n(Cc2ccccc2)c(=O)[nH]1
O=c1cc(NCc2cccnc2)nc[nH]1
O=c1cc(NCCCN2CCN(c3ccccc3)CC2)[nH]c(=O)[nH]1
O=C1CC(OC2CCCCO2)CC(OC2CCCCO2)CCCCNCCCCO1
O=c1cc[nH]c(=O)[nH]1
O=c1cc[nH]c(=S)[nH]1
O=c1cc[nH]c2cc(N3CCNCC3)ccc12
O=c1cc[nH]c2cc3occc(=O)c3cc12
O=c1cc[nH]c2nc(N3CCNCC3)ccc12
O=c1cc[nH]c2nc(N3CCNCC3)ncc12
O=c1cc[nH]c2ncccc12
O=c1cc[nH]n1-c1ccccc1
O=C1CC=CCCCCC2CCCC(O2)C(=O)C(=O)N2CCCCC2C(=O)OC(C=CC2CCCCC2)CCC1
O=C1CC2(CCCC2)CC(=O)N1CCCCN1CCN(c2ncccn2)CC1
O=C1CC2C(CC34C5CCC36CC(=O)OC6OC24C(=O)O5)O1
O=C1Cc2cc(CCN3CCN(c4nsc5ccccc45)CC3)ccc2N1
O=C1CC2CC(SC3CCCN3)=CN12
O=C1CC2CC=CN12
O=C1CC2CCC3C4CCCC4CCC3C2CO1
O=C1Cc2cccc(c2)Oc2cccc(c2)C2NC(=O)C(Cc3ccc(cc3)Oc3cc4cc(c3)C(NC2=O)C(=O)NC2C(=O)NC(Cc3ccc(cc3)O4)C(=O)NCc3ccccc3-c3cccc2c3)N1
O=C1Cc2ccccc2C(=C2CCNCC2)c2ccsc21
O=C1Cc2ccccc2CCN1CCCNCCc1ccccc1
O=C1Cc2ccccc2N1
O=C1Cc2ccccc2Nc2ccccc21
O=C1CC2N1CCS2(=O)=O
O=C1CC2SCC(CSc3nnn[nH]3)=CN12
O=C1CCC(=O)N1
O=C1CCC(c2ccccc2)=NN1
O=C1CCC(c2ccccc2)C(=O)N1
O=C1CCC(c2cccnc2)N1
O=c1ccc(-c2ccncc2)c[nH]1
O=C1CCC(N2C(=O)c3ccccc3C2=O)C(=O)N1
O=C1CCC2=C(CCC3C2CCC2CCCC23)C1
O=C1CCC2C3Cc4cccc5c4C2(CCN3)C1O5
O=C1CCC2C3Cc4cccc5c4C2(CCN3CC2CC2)C1O5
O=C1CCc2ccc(cc2)Oc2cc3cc(c2OC2OCCCC2OC2CCCCO2)Oc2ccc(cc2)CC2NC(=O)C(NC(=O)C3NC(=O)CN1)c1cccc(c1)-c1ccccc1CNC2=O
O=C1CCc2ccc(OCCCCN3CCN(c4ccccc4)CC3)cc2N1
O=C1CCc2ccccc2N1
O=c1ccc2ccccc2o1
O=C1CCCC(=O)C1C(=O)c1ccccc1
O=c1cccc(C2CCCCC2)[nH]1
O=C1CCCC(CCC2CC=CC3=CCCCC32)O1
O=C1CCCC1
O=C1CCCC1Cc1ccccc1
O=c1cccc2c(c1)CCCc1ccccc1-2
O=C1CCCc2ccccc21
O=C1CCCCCCCCCCCC2CCCC(CC(OC3CCCCO3)C=CC=CC=CC=CC=CC=CC=CCCCCO1)O2
O=C1CCCCOC(=O)CC(OC2CCCCO2)CC(OC2CCCCO2)CCC1
O=C1CCCN1
O=c1ccn(C2C=CCO2)c(=O)[nH]1
O=c1ccn(C2CC2)c2cc(N3CC4CCCNC4C3)ccc12
O=c1ccn(C2CC2)c2cc(N3CCCC3)ccc12
O=c1ccn(C2CC2)c2cc(N3CCNCC3)ccc12
O=c1ccn(-c2ccccc2)c2nc(N3CC4CC4C3)ccc12
O=c1ccn(C2CCCO2)c(=O)[nH]1
O=c1ccn2c3c(c(N4CCNCC4)ccc13)OCC2
O=C1CCN2CCc3ccccc3C2C1
O=C1CCNc2cc(N3CCNCC3)ccc21
O=C1CCO1
O=c1ccoc2cccc(OCCCOc3cccc4occc(=O)c34)c12
O=C1CCON1
O=C1CCS(=O)(=O)C(c2ccccc2)N1
O=C1CN(c2ccccc2)C(=S)N1c1ccccc1
O=C1CN(N=Cc2ccc(-c3ccccc3)o2)C(=O)N1
O=C1CN(N=Cc2ccc(-c3ccccc3)o2)C(=O)N1CCCCN1CCNCC1
O=C1CN(N=Cc2ccco2)C(=O)N1
O=c1cn[nH]c2cc3c(cc12)OCO3
O=C1CN=C(c2ccccc2)c2ccccc2N1
O=C1CN=C(c2ccccn2)c2ccccc2N1
O=C1CN2C(=O)C=COC2(c2ccccc2)c2ccccc2N1
O=C1CN2Cc3ccccc3N=C2N1
O=C1CNC(=O)C(Cc2ccccc2)NC(=O)C(Cc2ccccc2)NC(=O)CCSSCC(C(=O)N2CCCC2)NC(=O)CN1
O=C1CNC(=O)CNC(=O)C(Cc2c[nH]c3ccccc23)NC(=O)C(Cc2ccccc2)NC(=O)C(NC(=O)CCc2ccccc2)CSSCCN1
O=C1CNC(=O)CNC(=O)CNC(=O)CNC(=O)CNC(=O)CNC(=O)CNC(=O)CNC(=O)CNC(=O)CNC(=O)CN1
O=C1CNC(=O)N1c1ccccc1
O=C1N(Cc2ccc(-c3ccccc3-c3nn[nH]n3)cc2)C=NC12CCCC2
O=c1n(CCOc2ccccc2)cnn1CCCN1CCN(c2ccccc2)CC1
O=C1N=CC(C(=O)c2ccccc2)=N1
O=C1NC(=O)C(C2=CCCCC2)C(=O)N1
O=C1NC(=O)C(c2ccccc2)(c2ccccc2)N1
O=C1NC(=O)C(c2ccccc2)C(=O)N1
O=C1NC(=O)C(Cc2ccc(OCC3CCc4ccccc4O3)cc2)S1
O=C1NC(=O)C(Cc2ccc(OCCc3ccccn3)cc2)S1
O=C1NC(=O)C(Cc2ccc(OCCNc3ccccn3)cc2)S1
O=C1NC(=O)c2cccc3cccc1c23
O=C1NC(c2ccccc2)c2ccccc21
O=c1nc[nH]c2[nH]cnc12
O=c1nc[nH]c2ncc(CNc3ccccc3)nc12
O=c1nc2[nH]c3ccccc3nc-2c(=O)[nH]1
O=C1Nc2ccccc2C1=Cc1cccs1
O=C1Nc2ccccc2CCC1NCCCc1ccccc1
O=C1Nc2cccnc2N(C(=O)CN2CCNCC2)c2ccccc21
O=C1Nc2cccnc2N(C2CC2)c2ncccc21
O=C1NCC(CCN2CCOCC2)C1(c1ccccc1)c1ccccc1
O=C1NCC2(CCN(CCc3ccccc3)CC2)O1
O=C1NCc2cncn2-c2ccccc21
O=c1nccc[nH]1
O=c1ncccn1C1CCCO1
O=c1ncccn1C1COCS1
O=c1ncccn1C1CSCO1
O=C1NCCN(C(=O)NC(C(=O)NC2C(=O)N3CCSC23)c2ccccc2)C1=O
O=C1NCNC(=O)C1c1ccccc1
O=C1NS(=O)(=O)c2ccccc21
O=C1O[Pt]OC(=O)C12CCC2
O=C1OC(C2NCCc3cc4c(cc32)OCO4)c2ccccc21
O=C1OC2(c3ccccc3Oc3ccccc32)c2ccccc21
O=C1OC2CC(CC=CC(OC3CCC(OC4CCCCO4)CO3)CC=CC=C3COC4CC=CC1C34)OC1(C2)CC2CCC2O1
O=c1oc2ccccc2cc1Cc1ccccc1
O=C1OCC(c2ccccc2)=C1c1ccccc1
O=C1OCC2C(OC3CCC4OCOCC4O3)c3cc4c(cc3C(c3ccccc3)C12)OCO4
O=C1OCc2ccccc21
O=C1OCCN1c1ccc(N2CCOCC2)cc1
O=S(=O)(c1ccccc1)c1ccccc1
O=S(=O)(Cc1ccc2[nH]ccc2c1)N1CCCC1
O=S(=O)(Nc1ccccn1)c1ccc(N=Nc2ccccc2)cc1
O=S(=O)(Nc1ccccn1)c1ccccc1
O=S(=O)(Nc1ccncn1)c1ccccc1
O=S(=O)(Nc1ccno1)c1ccccc1
O=S(=O)(Nc1ccon1)c1ccccc1
O=S(=O)(Nc1nc(-c2ncccn2)ncc1Oc1ccccc1)c1ccccc1
O=S(=O)(Nc1ncccn1)c1ccccc1
O=S(=O)(Nc1nccs1)c1ccccc1
O=S(=O)(Nc1nncs1)c1ccccc1
O=S(Cc1ccccn1)c1nc2ccccc2[n-]1
O=S(Cc1ccccn1)c1nc2ccccc2[nH]1
O=S1(=O)N=CNc2ccccc21
O=S1(=O)NC(CC2CCCC2)Nc2ccccc21
O=S1(=O)NC(Cc2ccccc2)Nc2ccccc21
O=S1(=O)Nc2ccccc2Nc2ccccc21
O=S1(=O)NCNc2ccccc21
S=c1[nH]cc[nH]1
S=c1[nH]cnc2[nH]cnc12
S=c1nc[nH]c2nc[nH]c12
carbon skeleton-970
C(CCC1CCC2CCCCC12)CC1CCC(C2CCC3CCCC3C2)CC1
C(CCC1CCCC1)CCC1CCCC1
C(CCCC1CC2CCCCC2C1)CCC1CCC2CCCCC2C1
C(CCCC1CCCCC1)CCC1CCCCC1
C(CCCC1CCCCC1)CCCC1CCCCC1
C(CCCCC1CCCC2CC3CCCCC3C12)CCCC1CCCCC1
C1C2CC3CC1CC(C2)C3
C1CC(CC2CCC34C5CCCC3C2CC2CCCC(C5)C24)C1
C1CC1
C1CC2CC(C1)CC1CCCC3CCCC(CC4CCC(CC4)CC4CCCC5CCC(C2)CC54)C31
C1CC2CC3CCCC45C(CCCC34)CC(C1)C25
C1CC2CCC3CCCC3C2C1
C1CC2CCCC2C1
C1CCC(C(C2CCCCC2)C2CCCC2)CC1
C1CCC(C(C2CCCCC2)C2CCCCC2)CC1
C1CCC(C(CC2CCCC2)CC2CCCC2)CC1
C1CCC(C(CCC2CCCC2)C2CCCCC2)CC1
C1CCC(C(CCCC2CCCC2)C2CCCCC2)CC1
C1CCC(C2(C3CCCCC3)CC2C2CCCC2)CC1
C1CCC(C2(C3CCCCC3)CCCCC2)CC1
C1CCC(C2C3CCCCC3C3CCCC32)CC1
C1CCC(C2C3CCCCC3CCC3CCCC32)CC1
C1CCC(C2C3CCCCC3CCC3CCCCC32)CC1
C1CCC(C2CC2)CC1
C1CCC(C2CC2CC2CCCC3C(C4CCCC4)CCC23)CC1
C1CCC(C2CC3CCC2C3)CC1
C1CCC(C2CC3CCCC3C2)CC1
C1CCC(C2CC3CCCCC3C2)C1
C1CCC(C2CC3CCCCC3C2)CC1
C1CCC(C2CC3CCCCC3CC3CCCCC32)CC1
C1CCC(C2CCC(C(C3CCCCC3)C3CCCCC3)CC2)CC1
C1CCC(C2CCC(C3CCCCC3)C2)CC1
C1CCC(C2CCC(CC3CCC4CCC(C5CC6CCCCC6C5)CC43)CC2)CC1
C1CCC(C2CCC(CCC(C3CCCCC3)C3CCCCC3)CC2)CC1
C1CCC(C2CCC(CCC3CCC(CC4CCCC4)(C4CCCCC4)C3)CC2)CC1
C1CCC(C2CCC(CCC3CCC4CCCCC43)CC2)CC1
C1CCC(C2CCC2)CC1
C1CCC(C2CCC3C2CCC2C4CCCCC4CCC23)CC1
C1CCC(C2CCC3CCC4C5CC(C6CCCCC6)CC5CCC4C3C2)CC1
C1CCC(C2CCC3CCCC3C3CCCCC23)CC1
C1CCC(C2CCC3CCCCC32)CC1
C1CCC(C2CCC3CCCCC3C2)CC1
C1CCC(C2CCCC(CC3CCCC3)C2)CC1
C1CCC(C2CCCC2)C1
C1CCC(C2CCCC2)CC1
C1CCC(C2CCCC2C2CCCCC2)CC1
C1CCC(C2CCCC3C(C4CCCCC4)CCCC23)CC1
C1CCC(C2CCCC3CCCC32)CC1
C1CCC(C2CCCC3CCCCC32)CC1
C1CCC(C2CCCCC2)CC1
C1CCC(C2CCCCC2C2CCCC2)CC1
C1CCC(C2CCCCC2C2CCCCC2)CC1
C1CCC(C2CCCCC2CCC2CCC3CCCC3C2)CC1
C1CCC(C2CCCCC3CCCCC32)CC1
C1CCC(C2CCCCCC3CCCCC32)CC1
C1CCC(CC(C2CCCCC2)C2CCCCC2)CC1
C1CCC(CC(CC2CCCC2)C2CCCCC2)CC1
C1CCC(CC(CCC2CCCC2)C2CCCCC2)CC1
C1CCC(CC2CC3CCCCC3C2)CC1
C1CCC(CC2CCC(C3CCCC4CCCC43)C2)C1
C1CCC(CC2CCC(C3CCCCC3C3CCCC3)CC2)C1
C1CCC(CC2CCC(CC3CCCCC3)CC2)CC1
C1CCC(CC2CCC(CC3CCCCC3CC3CCCCC3)C2)CC1
C1CCC(CC2CCC(CCC3CCCC3)CC2)CC1
C1CCC(CC2CCC3CCCC3C2)C1
C1CCC(CC2CCC3CCCC3C2)CC1
C1CCC(CC2CCC3CCCCC32)CC1
C1CCC(CC2CCCC(CC3CCCCC3)C2)CC1
C1CCC(CC2CCCC2)CC1
C1CCC(CC2CCCC2CC2CCCCC2)CC1
C1CCC(CC2CCCC2CCCC2CCCC2)CC1
C1CCC(CC2CCCC3CCCC32)C1
C1CCC(CC2CCCC3CCCCC32)CC1
C1CCC(CC2CCCCC2)CC1
C1CCC(CC2CCCCC2C2CCCC2)CC1
C1CCC(CCC(C2CCCCC2)C2CC3CCC2C3)CC1
C1CCC(CCC(C2CCCCC2)C2CCCCC2)CC1
C1CCC(CCC(CC2CCCC2)C2CCCCC2)CC1
C1CCC(CCC2C3CCCCC3CC3CCCCC32)CC1
C1CCC(CCC2CCC(CC3CC4CCCCC4C3CC3CCCCC3)CC2)CC1
C1CCC(CCC2CCC3CCCCC3C2)CC1
C1CCC(CCC2CCCC(CC3CCCC3)C2)CC1
C1CCC(CCC2CCCC(CCC3CCCCC3)C2)CC1
C1CCC(CCC2CCCC2)CC1
C1CCC(CCC2CCCC3CCCC32)CC1
C1CCC(CCC2CCCCC2)CC1
C1CCC(CCC2CCCCC2C2CCCC2)C1
C1CCC(CCCC(C2CCCC2)C2CCCC2)CC1
C1CCC(CCCC(C2CCCCC2)C2CCCCC2)CC1
C1CCC(CCCC2C3CCCCC3CC3CCCCC32)CC1
C1CCC(CCCC2CCC(C(C3CCCCC3)C3CCCCC3)CC2)CC1
C1CCC(CCCC2CCC(C3CCCCC3)CC2)CC1
C1CCC(CCCC2CCC3CCCCC3C2)C1
C1CCC(CCCC2CCCC3CCCCC32)C1
C1CCC(CCCC2CCCCC2)CC1
C1CCC(CCCCC2CC2)CC1
C1CCC(CCCCC2CCC(C(C3CCCCC3)C3CCCCC3)CC2)CC1
C1CCC(CCCCCC2CC2)CC1
C1CCC(CCCCCC2CCCC3CCCCC23)CC1
C1CCC(CCCCCC2CCCCC2)CC1
C1CCC2(CC1)CCCC2
C1CCC23C4CCCC2C(C1)CC1CCCC(C4)C13
C1CCC23CCCCC2CC2CCCC(C1)C23
C1CCC2C(C1)C1CCC2C2CCCCC21
C1CCC2C(C1)CC1CCC3CCCC2C31
C1CCC2C(C1)CC1CCCC12
C1CCC2C(C1)CC1CCCC2C1
C1CCC2C(C1)CC1CCCCC12
C1CCC2C(C1)CC1CCCCC1C1CC21
C1CCC2C(C1)CC1CCCCC1C1CCCCC21
C1CCC2C(C1)CCC1C3CCCC3CCC21
C1CCC2C(C1)CCC1CCCCC12
C1CCC2C(C1)CCC2C1CCCC1
C1CCC2C(C1)CCCC2CC1CC2CCC1CC2
C1CCC2C(C1)CCCC2CC1CCCC2CCCCC21
C1CCC2CC(C3CCCC3)CCC2C1
C1CCC2CC3C4CCCC(C4)C3CC2C1
C1CCC2CC3CCCCC3CC2C1
C1CCC2CC3CCCCC3CCC2C1
C1CCC2CCCC2C1
C1CCC2CCCCC2C1
C1CCC2CCCCC2CC1
C1CCCC(C2CCCCC2)CC1
C1CCCC(C2CCCCCCC2C2CCCCCCC2)CCC1
C1CCCC1
C1CCCCC1
CC(C)(C1CCCCC1)C1CCCCC1
CC(C)(CC1CC(C2CCCCC2)CCC1CC1CCCCC1)C1CCCCC1
CC(C)(CC1CCC2CCCC2C1)C1CCCC1
CC(C)(CC1CCCC1)C1CCCCC1
CC(C)(CC1CCCCC1)C1CCC(CCC2CCCCC2)CC1
CC(C)(CC1CCCCC1)C1CCCCC1
CC(C1CCC(C2CCC3CCCCC3C2)CC1)C1CCC2CCCCC2C1
CC(C1CCC(C2CCCCC2)CC1)C1CC2CCCCC2C1
CC(C1CCC(CCCC2CCCCC2)CC1)C1C2CCCCC2CC1C1CCCCC1
CC(C1CCCC1)C(CCC1CCCCC1)(C1CCCCC1)C1CCCCC1
CC(C1CCCC1)C1CCC(C2CCC3CCCCC3C2)CC1
CC(C1CCCCC1)C1CCC2CCCC21
CC(C1CCCCC1)C1CCC2CCCC2C1
CC(C1CCCCC1)C1CCC2CCCCC21
CC(C1CCCCC1)C1CCCC1
CC(C1CCCCC1)C1CCCCC1
CC(CC12CC3CC(CC(C3)C1)C2)C1CCC2CC21
CC(CC1C(C)C2CC(CC3CCCCC3)CCC21)C(C)C1CCCC1
CC(CC1C(C)C2CC(CCC3CCCC3)CCC21)C(C)C1CCCC1
CC(CC1C(C)C2CCCC21)C1CCCC1C1CCCCC1
CC(CC1C(C)C2CCCCC21)C(C)C1CCCC1
CC(CC1C2CCCCC2C(C)C1C1CCCCC1)C1CCCCC1
CC(CC1CC2C(CC(C)C3CCCC32)C1C)C1CCC2CC3CCC4CCCC(C2C1)C43
CC(CC1CC2C3CCCC3C(C)C(CC3CCCCC3)C2C1C)C1CCC2CC3CCC4CCCC(C2C1)C43
CC(CC1CC2CCC(C1)C21CCCC1)C(C1CCCCC1)C1CCCCC1
CC(CC1CC2CCC(C2)C1)C1CCC2CCCCC21
CC(CC1CC2CCC1C2)CC(C)(C)C1CCCCC1
CC(CC1CC2CCC1CC2)C1CCC2CCCCC2C1C1CCCCC1
CC(CC1CC2CCCC(C2)C1)C1CCC2CCCCC21
CC(CC1CC2CCCC2C1)CC(C)(C)C1CCCCC1
CC(CC1CCC(C(C)(C)CC2CCCC2)CC1)C1CCCCC1
CC(CC1CCC(C(C)C2CCC3CCCC3C3CCCCC23)CC1)C1CCCCC1C1CCCCC1
CC(CC1CCC(CCCCC2CCCCC2)CC1)C1CCCCC1
CC(CC1CCC2CC3C(CCC4C5CCCCC5CC34)CC2C1)C1CCCCC1
CC(CC1CCC2CCCCC21)C(CCCC1CCC(CC2CCCCC2)CC1)CC1CCCCC1
CC(CC1CCC2CCCCC21)C1CCCCC1
CC(CC1CCCC(C(C)CC2CCCC(C(C)CC3CCCC4CCCCC43)C2)C1)CC1CCCC(C(C)CC2CCCC(C(C)CC3CCCC4CCCCC43)C2)C1
CC(CC1CCCC(C2CCCCC2)C1)C1CCCCC1
CC(CC1CCCC(CC2CCCC(C3CCCCC3)C2)C1)C1CCC(CC2CCCCC2)CC1
CC(CC1CCCC1)C(C1CCCCC1)C1CCCC1
CC(CC1CCCC1)C1CC2CCCCC2C(C)(C)C1
CC(CC1CCCC1)CC1C(C)C2CC(CCC3CCCC3)CCC12
CC(CC1CCCC1)CC1C(C)C2CCCC21
CC(CC1CCCC1)CC1C(C)C2CCCCC21
CC(CC1CCCC2C(C)CC(C3CCCC3)CC12)C1CCC(CCCCCC2CCCCC2)CC1
CC(CC1CCCCC1)C(C(C)CC1C(C)C2CCCC21)C1CCCCC1
CC(CC1CCCCC1)C(C1CCCCC1)C1CCCCC1
CC(CC1CCCCC1)C1CC2CCCC2C(C)(C)C1
CC(CC1CCCCC1)C1CC2CCCCC2C(C)(C)C1
CC(CC1CCCCC1)C1CC2CCCCC2C1
CC(CC1CCCCC1)C1CC2CCCCC2CC1C
CC(CC1CCCCC1)C1CCC(CC2CC3CC(C)C3C2)C1
CC(CC1CCCCC1)C1CCCC1
CC(CC1CCCCC1)C1CCCCC1
CC(CC1CCCCC1)CC(C)(C)C1CCC(CCC2C(C)CC3CCCCC3C2C)CC1
CC(CC1CCCCC1)CC(C)(C)C1CCC(CCCC(C)C2CCCC2C)CC1
CC(CC1CCCCC1)CC(C)(C)C1CCC(CCCC(C)C2CCCCC2)CC1
CC(CC1CCCCC1)CC(C)(C)C1CCCCC1
CC(CC1CCCCC1)CC1C(C)C2CC(CCC3CCCC3)CCC12
CC(CC1CCCCC1)CC1C(C)C2CCCC21
CC(CC1CCCCC1)CC1C(C)C2CCCCC21
CC(CC1CCCCC1)CC1CC2CC(C1)C1CC21
CC(CC1CCCCC1)CC1CC2CCC(C2)C1
CC(CC1CCCCC1CCC1CCCCC1)C1CCCCC1
CC(CCC(C)C1CCC2CCCCC2C1)CC(CCC1CCC2CCCCC2C1)CC1CCCCC1
CC(CCC(C)C1CCCC1)CCC(C)C(CC1CCC2CCCCC2C1)CC(C)C(CC(C)CCC(C)C(CC(C)C(CC1CCCC1)CC(C)C1CCC(C)C1)CC1CCC2CCCCC21)CC1CCCCC1
CC(CCC(C)CCC(C)C(CC(C)CCC(C)C(CC(C)C(CC1CCCC1)CC(C)C1CCC(C)C1)CC1CCC2CCCCC21)CC1CCCCC1)CCC(C)C1CCCC1
CC(CCC1(C(C)CC2CCCCC2)CCCC1)CC1CCC2CCCC2C1
CC(CCC12CC3CC(CC(C3)C1)C2)C1CCCC1
CC(CCC1C(C)C(C2CCCCC2)C(C2CCCCC2)C1C)C1CCCCC1
CC(CCC1CCCC1)C(C1CCCCC1)C1CCCCC1
CC(CCC1CCCC1)C1CCC2CCCC2C1
CC(CCC1CCCC1)C1CCCCC1
CC(CCC1CCCCC1)C1C2CCCCC2CC2CCCCC21
CC(CCC1CCCCC1)C1CCC1C(C)CC1CCCCC1
CC(CCC1CCCCC1)C1CCCC1
CC(CCC1CCCCC1)C1CCCCC1
CC(CCC1CCCCC1)CC1C(C)C2CCCC21
CC(CCC1CCCCC1C1CCCCC1)CC1CCCCC1
CC(CCCC1CCC(C2CCCCC2)CC1)C1CCCCC1
CC(CCCC1CCC(C2CCCCC2)CC1)C1CCCCC1CC1CCCC2CCCCC21
CC(CCCC1CCC1)C1CCC2CC21
CC(CCCC1CCCC1)C1CCCCC1
CC(CCCC1CCCCC1)C1CCCC1
CC(CCCC1CCCCC1)C1CCCCC1
CC(CCCCC1CCCCC1)CC(C)C1CCC(C2CCCCC2)C1
CC(CCCCCC1CCC2CCC(C)C2C1)CCCC1CCCCC1
CC(CCCCCC1CCCCC1)C1CCC2CCCC21
CC(CCCCCC1CCCCC1)C1CCC2CCCCC21
CC(CCCCCC1CCCCC1)C1CCC2CCCCC2C1
CC(CCCCCC1CCCCC1)C1CCCC1
CC(CCCCCC1CCCCC1)C1CCCC1C
CC(CCCCCC1CCCCC1)C1CCCCC1
CC(CCCCCC1CCCCC1)C1CCCCC1C1CCCCC1
CC(CCCCCC1CCCCC1)CC1CC2CCCCC2C1
CC(CCCCCCC(C)CC(C)CC1CCCCC1)CC(C)CC1CCCCC1
CC(CCCCCCC(C)CCCCC1CCC2CCCCC2C1CC1CCCCC1)CCCCC1CCC2CCCCC2C1CC1CCCCC1
CC(CCCCCCC(C1CCCCC1)C1CCCCC1)C1CCCCC1C1CCCCC1
CC(CCCCCCCC(C)CCC1CCC2CCCCC2C1CC1CCCCC1)CCC1CCC2CCCCC2C1CC1CCCCC1
CC(CCCCCCCCC(C)CC1CCCCC1)CC1CCCCC1
CC(CCCCCCCCC1CCCCC1)C1CCCCC1
CC(CCCCCCCCCC(C)CC1CCCCC1)CC1CCCCC1
CC1(C)CC(CC2CCCC2)CC2CCCCC21
CC1(C)CC(CC2CCCCC2)CC2CCCCC21
CC1(C)CC2CCCCC2CC2CCCCC21
CC1(C)CCCC2CCCCC21
CC1C(C)C(C2CCC(C3CCCCC3)CC2)CC2CCCCC21
CC1C(C2CC3CCC2CC3)CC2CCCC3CCCC1C32
CC1C(C2CCCCCC2)CC(CC2CCCCC2)C2CCCCC12
CC1C(CC2CCC(C3CCCCC3C3CCCC3)CC2)CCC12CCCC2
CC1C(CC2CCCC2)CCC2CC3CCCCC3C21
CC1C(CCC2CCC(C3CCC4CCCCC43)CC2)CCC2CCCCC21
CC1C(CCCC2CCC(C3CCCCC3)CC2)CC2CCCCC21
CC1C(CCCC2CCCCC2)C(C2CCCCC2)C1C1CCCCC1
CC1C(CCCC2CCCCC2)CCC1CCCC1CCC(C2CCCCC2)CC1
CC1C(CCCCC2CCCCC2)CCCC2CCCCC21
CC1C2CCCC2C1CCC1CCCCCC1
CC1C2CCCCC2C(C)C1C1CCCCC1
CC1C2CCCCC2C(C)C2CC3C(CC4CCCCC4)CCCC3CC12
CC1C2CCCCC2C(C)C2CCCCC12
CC1C2CCCCC2C(C2C3CCCCC3C(C)C3C(CC4CCCCC4)CCCC32)C2CCCC(CC3CCCCC3)C12
CC1C2CCCCC2CC1C1CCCCC1
CC1C2CCCCC2CCC1C1CCCCC1
CC1C2CCCCC2CCC2CCCCC21
CC1CC(C(C)C2CCCCC2)CC2C1CCC1CCCCC12
CC1CC(C)(C)C2CCCCC12
CC1CC(C)C(C2CCCCC2)(C2CCCCC2)C1
CC1CC(C)C(C2CCCCC2)C(C)C1
CC1CC(C)C(C2CCCCC2)C1
CC1CC(C)C(C2CCCCC2)C1C1CCCCC1
CC1CC(C)C(C2CCCCC2)C2CCCCC2C1
CC1CC(C)C(CC2CCC(CCC3CCC4CCCCC4C3)CC2)C1
CC1CC(C)C(CC2CCC(CCCC3CCCCC3)CC2)C1
CC1CC(C)C(CC2CCC(CCCCC3CCCCC3)CC2)C1
CC1CC(C)C(CC2CCCCC2)C(C2CCCCC2)C1
CC1CC(C)C(CCC2CCC(C3CCCCC3)C2)C1
CC1CC(C)C(CCC2CCCC2)C1
CC1CC(C)C2C(CCCCCCC3CCCCC3)CCC2C1
CC1CC(C)C2CC3CCCCC3CC2C1
CC1CC(C)C2CCCC2C1
CC1CC(C)C2CCCC3CCCC1C32
CC1CC(C)CC(C)C1
CC1CC(C)CC(CCCCC2CCC(C3CCCCC3)CC2)C1
CC1CC(C2CCCC3CC4CCCC4CC32)C2CCCCC12
CC1CC(C2CCCCC2)C(C)C1C1CCCCC1
CC1CC(C2CCCCC2)C2CCCCC12
CC1CC(CCC2CCC(C3CCCCC3)C2)C(C)C1CCCCC1CCCCC1
CC1CC2(C3CCCCC3CC3CCCCC32)C2CCCCC12
CC1CC2(CCCC2)CC(C)C1CCCCC1CCC(C2CCCCC2)CC1
CC1CC2C1CCC2(C)C
CC1CC2C3CC(CC(C)C4CCC5CCCCC54)CC2CC1C3
CC1CC2C3CCCCC3CCC2C2CCC3CCCCC3C12
CC1CC2CC(C)C2C1
CC1CC2CC(CC3CCCC3)CC12
CC1CC2CC(CCCC(CC3CCC(CC4CCCCC4)CC3)CCCCC3CCC4CCCC1C34)CC1(C2)CC2CCC2C1
CC1CC2CC34C5CCC36CC(C)CC6CC4(C(C)C5)C2C1
CC1CC2CC3CC4CCCCC4CC3C(C)C2C(C)C1C
CC1CC2CC3CCCCC3CC2C1
CC1CC2CCC(CCC3CCC(C4CCC5CCCCC54)CC3)CC2C1
CC1CC2CCC(CCC3CCCC3)CC12
CC1CC2CCC34C2CC1C1CC2C5CCCCC5C56CCC7CC(C)C(CC75)C(CC(C5CCCCC53)C14)C26
CC1CC2CCC3C4CCCC4CCC3C2C2CC12
CC1CC2CCCC(C2)CC2CCCC(C2)C2CC(C)C(C1)CC1CCC(CC1)CC1CC3CC4CCC(CC4)CC4CC(C)C(CC(C)C(CC2C)C(C1)C3)C1CCCC(C1)C1CCCCC1CCC4C
CC1CC2CCCC12
CC1CC2CCCC2C1
CC1CC2CCCC2C2CCC3CCCCC3C12
CC1CC2CCCCC2C(C(C)CC2CCCCC2)C2CCCCC12
CC1CC2CCCCC2C(C)C1CCC1CCC(C(C)C2CCCCC2)CC1
CC1CC2CCCCC2C(C2CC2)C2CCCCC12
CC1CC2CCCCC2C(C2CCCCC2)C2CCCC12
CC1CC2CCCCC2C1
CC1CC2CCCCC2C1C1CCC(CCC(C2CCCCC2)C2CCCCC2)CC1
CC1CC2CCCCC2C1CC1CCCC1
CC1CC2CCCCC2C1CCCC1CCC(C(C2CCCCC2)C2CCCCC2)CC1
CC1CC2CCCCC2C1CCCC1CCC(CC2C(C)CC3CCCCC32)CC1
CC1CC2CCCCC2C2(C3CCCCC3)CCCC(C)C2C1
CC1CC2CCCCC2CC(C2CCCCC2)C1
CC1CC2CCCCC2CC1CC1CCCCC1
CC1CC2CCCCC2CC2CCCCC12
CC1CC2CCCCC2CCC1CCCCC1CCCCC1
CC1CC2CCCCC2CCC1CCCCCCC1CCCCC1
CC1CCC(C(C)C2CCCCC2)C1
CC1CCC(C)(C)C(C2CCCCC2)C1
CC1CCC(C)C1
CC1CCC(C)C1C1CCCCC1
CC1CCC(C)CC(C(C)C2CCCC2)CCCCCC(C)CC(CC2CCCCC2)C(C)CC(CC2CCCCC2)C(C)CC1
CC1CCC(C)CC2C(C)CC3C(C)CC(CC4CCC(CC4)CC4CC2CC(CC2CCC(CC1)CC2)C4CC1CCCCC1CC1CCCCC1)C(C)CCC1CCCCC1C1CCCC3C1
CC1CCC(C)CCC(C)CCC(C)CCC(C)CCC(C)CCC(C)CCC(C)CCC(C)CCC(C)CCC(C)CC1
CC1CCC(C2C(C)C3CCCCC3C2C)C(C)C1
CC1CCC(C2CC2)C2CC(C3CC4CCCCC4C3)CCC12
CC1CCC(C2CC2)C2CC(C3CCCC3)CCC12
CC1CCC(C2CC2)C2CC(C3CCCCC3)CCC12
CC1CCC(C2CCC3C2CCC2C4CCC(CC5CCC(CC6CCC(CC7CCCCC7)CC6)CC5)CC4CCC23)C1
CC1CCC(C2CCC3C2CCC2C4CCC(CC5CCC(CC6CCCC(CCC7CCCCC7)C6)CC5)CC4CCC23)C1
CC1CCC(C2CCC3C2CCC2C4CCC(CC5CCCCC5)CC4CCC23)C1
CC1CCC(C2CCCC2)C(C)C1
CC1CCC(C2CCCCC2)C(C)C1
CC1CCC(C2CCCCC2)C1
CC1CCC(C2CCCCC2)C1C1CCCCC1
CC1CCC(C2CCCCC2)C2CC(C3CC4CC4C3)CCC12
CC1CCC(C2CCCCC2)C2CCCCC2C1
CC1CCC(C2CCCCC2)CC1
CC1CCC(CCC2CCC(C(C)(C)CC3CCCCC3)CC2)CC1
CC1CCC(CCC2CCC3C(C2)C(C)C3CC(C)C(C)C2CCCC2)CC1C
CC1CCC(CCC2CCCCC2)C1(C1CCCCC1)C1CCCCC1
CC1CCC(CCC2CCCCC2)CC1
CC1CCC1
CC1CCC1CC(C)C(C)C1CCCC1
CC1CCC2(CCC(CCC3CCCCC3)CC2)C1
CC1CCC2C(C1)CC1CCCC12
CC1CCC2C(CC3CCC4CCCCC4C3)C3CC4CCCC4CC3C(C3CCCCC3)C12
CC1CCC2C(CCC3C2CCC2C3CCC23CCC(C)C3)C1
CC1CCC2C(CCC3C2CCC2C4CCCC4CC23)C1
CC1CCC2C(CCC3C4CCCC4CC(C)C23)C1
CC1CCC2C(CCC3C4CCCC4CC(C4CCCCC4)C23)C1
CC1CCC2C(CCC3C4CCCC4CCC23)C1
CC1CCC2C1CCC1C3CCCCC3CCC21
CC1CCC2C3CC4CCCC5CC1C2(CCC3CC1CC1)C45
CC1CCC2C3CCCC24C1CC1CCCC(C3)C14
CC1CCC2CC(C)C(CCCCC3CCC(C4CCCCC4)C3)C2CC(C)CCCC(CC2CCCCC2)CC(C)C1
CC1CCC2CCC(CCCCCC3CCC(C4CCCCC4)CC3)CC2C1
CC1CCC2CCC3CCCCC3C2C1
CC1CCC2CCCC2C1
CC1CCC2CCCC2C2CCCCC12
CC1CCC2CCCC3C(C4CCCCC4)CCC1C23
CC1CCC2CCCCC12
CC1CCC2CCCCC2C1
CC1CCCC(C(C)CC(C(C)CC2C(C)C3CCCC32)C2CCCCC2)C1C
CC1CCCC(C)C(C2CCCC(C)C2)CC(C)C(C)CC(C)CCC(C)CC1
CC1CCCC(C)C(C2CCCCC2)CC(C)C(C)CC(C)CCC(C)CC1
CC1CCCC(C)C1
CC1CCCC(C)C12CCC2
CC1CCCC(C)C1C(C)C1CCCCC1
CC1CCCC(C)C1C1CCCCC1
CC1CCCC(C2CCCCC2)C1
CC1CCCC(CCC2CCCC3CCCCC32)C1
CC1CCCC(CCC2CCCCC2)C1
CC1CCCC1
CC1CCCC1C(C)CC(C(C)CC1C(C)C2CCCC21)C1CCCCC1
CC1CCCC1C1CCC(C2CCC(C3CCC(CCC4CCC(CC5CCCC5)(C5CCCCC5)C4)CC3)CC2)CC1
CC1CCCC1C1CCC(C2CCCCC2)CC1
CC1CCCC1C1CCCCC1
CC1CCCC1CC1CCCCC1
CC1CCCC1CCC1CCC(CC2CCCCC2)CC1
CC1CCCC2C(CCCC3CCCCC32)C1
CC1CCCC2C1CCC2C1CCCC1C
CC1CCCC2CC(C3CCCCC3)CCC12
CC1CCCC2CC3CC4CCCCC4C(C)C3CC12
CC1CCCC2CC3CC4CCCCC4CC3C(C)C12
CC1CCCC2CC3CCCC(C)C3CC12
CC1CCCC2CC3CCCC3CC12
CC1CCCC2CCC(CCC3CCCCC3)CC12
CC1CCCC2CCCC(CCCCCC3CCCC4CCCC(C)C34)C12
CC1CCCC2CCCC12
CC1CCCC2CCCCC12
CC1CCCCC1
CC1CCCCC1C1CCCC1
CC1CCCCC1CC1CCCCC1
CC1CCCCC1CCC1CCCC2CCCC21
CC1CCCCCC(C)CC(CC2CCCCC2)CC(CC2CCCCC2)CCC1
CC1CCCCCCC(CC(C)CCC2CCCCC2)C(C)CC(CC2CCCCC2)C(C)CC(CC2CCC3CCCCC32)C(C)CCC(C)CC1
CC1CCCCCCCC2CCCC(C2)C(C)C(C)C2CCCCC2C(C)CC(CCC2CCCCC2)CCC1
CC1CCCCCCCCCCC(CC2CCCCC2)CC(CC2CCCCC2)C1
CC1CCCCCCCCCCCCCCCC2CC3CCC4C(C)C(C1)C1CC5(CCCCC5)CC1C4C3C2C
CC1CCCCCCCCCCCCCCCC2CC3CCC4CC(C1)C(CCC1CCCCC1)CC4C3C2C
CC1CCCCCCCCCCCCCCCCCCCC(CC2CCCCC2)CC2CCCC(CCCCCCCCCCC1)C2
scaffold-poor-578
C(CC[NH+]1CCCC1)CC[NH+]1CCCC1
C=C1C[NH+]2CCC34c5ccccc5N5C=C6C7CC8[NH+](CCC89c8ccccc8N(C=C(C1CC23)C54)C69)CC7=C
C1=CC(NC2CCC(OC3CCCOC3)OC2)CCC1
C1=COC(OC2CCCC(OC3CCCCO3)C2)CC1
C1=COCCC1
c1cc[n+](COC[n+]2ccccc2)cc1
C1CC[NH+](C2CCC3CCC4C5CC([NH+]6CCCCC6)CC5CCC4C3C2)CC1
c1cc[nH+]cc1
c1cc2cc(c1)Oc1ccc3c(c1)C(Cc1ccc(cc1)Oc1cccc4c1C(C2)[NH2+]CC4)[NH2+]CC3
c1ccc(C(=C2CC[NH2+]CC2)c2ccccc2)cc1
c1ccc(C[NH2+]CCOc2ccccc2)cc1
c1ccc(COC2CCCC(COC3CCCCO3)O2)cc1
C1CCC(OC2CCCC(OC3CCCCO3)C2)OC1
C1CCC(OC2CCOC2)OC1
C1CCC(OC2COC(OC3CCCCC3OC3CCCCO3)C2)OC1
C1CCC(OC2OCCC2OC2CCCCO2)CC1
C1CCC(OCC2CCCC(OC3CCCO3)O2)OC1
c1ccc(OCCCCCOc2ccccc2)cc1
c1ccc2c(c1)Cc1ccccc1O2
c1ccccc1
C1CCN(C2CCC3CCC4C5CC([NH+]6CCCCC6)CC5CCC4C3C2)CC1
c1ccncc1
C1CCOCC1
N=C(C(=O)NC1C(=O)N2C=C(C[n+]3ccccc3)CSC12)c1cscn1
N=C(C(=O)NC1C(=O)N2C=C(CSc3nc(=O)c(=O)[nH][nH]3)CSC12)c1cscn1
N=C(C(=O)NC1C(=O)N2C=C(CSc3nccs3)CSC12)c1cscn1
N=C(C(=O)NC1C(=O)N2C=CCSC12)c1cscn1
N=C(C(=O)NC1CNC1=O)c1cscn1
N=C(NCCCCNC(=N)NC(=N)Nc1ccccc1)NC(=N)Nc1ccccc1
O=C(CC[NH+]1CCc2ccccc2C1Cc1ccccc1)OCCCCCOC(=O)CC[NH+]1CCc2ccccc2C1Cc1ccccc1
O=C(Cc1ccccc1)NC1C(=O)N2C=C(CSc3nnn[nH]3)COC12
O=C(Cc1ccccc1)OC1CC2[NH2+]C(C1)C1OC21
O=C(Cc1ccccc1)OC1CC2CCC(C1)[NH2+]2
O=C(Cc1ccsc1)NC1C(=O)N2CCSC12
O=C(CCC=CCCC(=O)OCCC[NH+]1CCc2ccccc2C1Cc1ccccc1)OCCC[NH+]1CCc2ccccc2C1Cc1ccccc1
O=C(CNCCCc1ccccc1)N1CCc2ccccc2C1
O=C(COCCOCCOCC(=O)Nc1ccccc1)Nc1ccccc1
O=C(NC1C(=O)N2CCSC12)C(NC(=O)N1CCNC1=O)c1ccccc1
O=C(Nc1ccc(S(=O)(=O)Nc2nccs2)cc1)c1ccccc1
O=C(NCC1CCCCO1)C1CCCN1
O=C(NCCCCCCNC(=O)Oc1ccc[nH+]c1)Oc1ccc[nH+]c1
O=C(OC1CC[NH2+]C1)C(c1ccccc1)C1CCCC1
O=C(OC1CC2CCC(C1)[N+]21CCCC1)C(c1ccccc1)c1ccccc1
O=C(OCC1CCC[NH2+]1)C(c1ccccc1)c1ccccc1
O=C1C(NCCCc2ccccc2)CCCN2CCCCN12
O=C1c2ccccc2C(=O)c2ccccc21
O=c1cc[nH]c2cc3occc(=O)c3cc12
O=C1CC2CC(SC3CCCN3)=CN12
O=C1CC2CC=CN12
O=C1CC2N1CCS2(=O)=O
O=C1CC2SCC(CSc3nnn[nH]3)=CN12
O=C1CCc2ccc(cc2)Oc2cc3cc(c2OC2OCCCC2OC2CCCCO2)Oc2ccc(cc2)CC2NC(=O)C(NC(=O)C3NC(=O)CN1)c1cccc(c1)-c1ccccc1CNC2=O
O=C1CCCCCCCCCCCC2CCCC(CC(OC3CCCCO3)C=CC=CC=CC=CC=CC=CC=CCCCCO1)O2
O=c1ccn(C2CCCO2)c(=O)[nH]1
O=C1NC(=O)c2cccc3cccc1c23
O=S(=O)(Nc1nccs1)c1ccccc1
carbon skeleton-poor-578
C(CCC1CCCC1)CCC1CCCC1
C(CCCC1CCCCC1)CCCC1CCCCC1
C1CC2CC(C1)CC1CCCC3CCCC(CC4CCC(CC4)CC4CCCC5CCC(C2)CC54)C31
C1CCC(C(C2CCCCC2)C2CCCCC2)CC1
C1CCC(C2CCC3CCC4C5CC(C6CCCCC6)CC5CCC4C3C2)CC1
C1CCC(CC2CCC(CC3CCCCC3)CC2)CC1
C1CCC(CC2CCC(CC3CCCCC3CC3CCCCC3)C2)CC1
C1CCC(CC2CCCC(CC3CCCCC3)C2)CC1
C1CCC(CC2CCCC2)CC1
C1CCC(CC2CCCC2CC2CCCCC2)CC1
C1CCC(CCC2CCCC(CC3CCCC3)C2)CC1
C1CCC(CCC2CCCC(CCC3CCCCC3)C2)CC1
C1CCC(CCCC2CCCCC2)CC1
C1CCC(CCCCCC2CCCCC2)CC1
C1CCC2CC3CCCCC3CC2C1
C1CCCCC1
CC(C)(CC1CCCC1)C1CCCCC1
CC(CC1C(C)C2CC(CC3CCCCC3)CCC21)C(C)C1CCCC1
CC(CC1C(C)C2CC(CCC3CCCC3)CCC21)C(C)C1CCCC1
CC(CC1C(C)C2CCCCC21)C(C)C1CCCC1
CC(CC1CC2CCC(C1)C21CCCC1)C(C1CCCCC1)C1CCCCC1
CC(CC1CCC(C(C)(C)CC2CCCC2)CC1)C1CCCCC1
CC(CC1CCCC1)C(C1CCCCC1)C1CCCC1
CC(CC1CCCC1)CC1C(C)C2CCCC21
CC(CC1CCCCC1)CC1C(C)C2CC(CCC3CCCC3)CCC12
CC(CC1CCCCC1)CC1CC2CC(C1)C1CC21
CC(CC1CCCCC1)CC1CC2CCC(C2)C1
CC(CCC1CCCC1)C(C1CCCCC1)C1CCCCC1
CC(CCC1CCCCC1)C1CCCC1
CC(CCCCCC1CCCCC1)C1CCC2CCCCC2C1
CC(CCCCCCC(C)CC(C)CC1CCCCC1)CC(C)CC1CCCCC1
CC(CCCCCCC(C)CCCCC1CCC2CCCCC2C1CC1CCCCC1)CCCCC1CCC2CCCCC2C1CC1CCCCC1
CC(CCCCCCCC(C)CCC1CCC2CCCCC2C1CC1CCCCC1)CCC1CCC2CCCCC2C1CC1CCCCC1
CC(CCCCCCCCC(C)CC1CCCCC1)CC1CCCCC1
CC(CCCCCCCCCC(C)CC1CCCCC1)CC1CCCCC1
CC1C(CCCCC2CCCCC2)CCCC2CCCCC21
CC1C2CCCCC2C(C)C2CCCCC12
CC1CC(C)C2CCCC3CCCC1C32
CC1CC2C1CCC2(C)C
CC1CC2CC(CC3CCCC3)CC12
CC1CC2CCC(CCC3CCCC3)CC12
CC1CC2CCC34C2CC1C1CC2C5CCCCC5C56CCC7CC(C)C(CC75)C(CC(C5CCCCC53)C14)C26
CC1CC2CCCC12
CC1CCC(C)CC2C(C)CC3C(C)CC(CC4CCC(CC4)CC4CC2CC(CC2CCC(CC1)CC2)C4CC1CCCCC1CC1CCCCC1)C(C)CCC1CCCCC1C1CCCC3C1
CC1CCC(C2CCCC2)C(C)C1
CC1CCC(CCC2CCC3C(C2)C(C)C3CC(C)C(C)C2CCCC2)CC1C
CC1CCC1CC(C)C(C)C1CCCC1
CC1CCCC1C(C)CC(C(C)CC1C(C)C2CCCC21)C1CCCCC1
CC1CCCC2CC3CCCC(C)C3CC12
CC1CCCCCCCCCCCCCCCCCCCC(CC2CCCCC2)CC2CCCC(CCCCCCCCCCC1)C2
scaffold-poor-970
C1CCC(OC2CCCC(OC3CCCCO3)C2)OC1
C(=Cc1ccccc1)CN1CCN(C(c2ccccc2)c2ccccc2)CC1
C(=Cc1cncn1Cc1ccccc1)Cc1cccs1
C=C1c2ccccc2COc2ccccc21
C=C1CC2CCCC2C1
C=C1CC2CCCC2C2CCC3=CCCCC3C12
C=C1CN2C(=O)CC2O1
C1=CC2C3Cc4cccc5c4C2(CCN3)C(C1)O5
C1=Cc2ccccc2C(=C2CCNCC2)c2ccccc21
C1=CCCCC1
C1=COCCC1
C1CC[NH+](C2CCC3CCC4C5CC([NH+]6CCCCC6)CC5CCC4C3C2)CC1
c1cc[nH+]cc1
c1ccc(C(=C2CC[NH2+]CC2)c2ccccc2)cc1
c1ccc(C(c2ccccc2)N2CCNCC2)cc1
C1CCC(C(CC2CCCCN2)C2CCCCC2)CC1
c1ccc(C2(Cn3ccnc3)OCC(COc3ccc(N4CCNCC4)cc3)O2)cc1
c1ccc(C2CCC2)cc1
c1ccc(-c2ccccc2)cc1
c1ccc(-c2ccccc2-c2nnn[nH]2)cc1
c1ccc(-c2nnn[nH]2)c(-c2ccc(Cn3ccnc3)cc2)c1
c1ccc(Cc2ccccc2)cc1
c1ccc(Cc2ccccn2)cc1
c1ccc(CN2CCc3sccc3C2)cc1
c1ccc(COC2CCCC(COC3CCCCO3)O2)cc1
c1ccc(COc2ccccc2)cc1
c1ccc(Nc2ccccn2)cc1
c1ccc(Nc2ccnc(Nc3ccccc3)n2)cc1
c1ccc(NCc2cnc3ncncc3n2)cc1
C1CCC(OC2CCCC(OC3CCCCO3)C2)OC1
C1CCC(OC2CCOC2)OC1
C1CCC(OC2COC(OC3CCCCC3OC3CCCCO3)C2)OC1
c1ccc(OCCNCCOCc2cccc3[nH]c4ccccc4c23)cc1
C1CCC2(CC1)OCCO2
c1ccc2[nH]c(C3CCNCC3)cc2c1
c1ccc2[nH]cnc2c1
c1ccc2c(c1)Cc1ccccc1N1CCNCC21
c1ccc2c(c1)Cc1cccnc1N1CCNCC21
c1ccc2c(c1)CCC1C2CCC2CCCC21
c1ccc2c(c1)CCc1sccc1C2=C1CCNCC1
c1ccc2c(c1)CCCN2
c1ccc2c(c1)CCCO2
c1ccc2c(c1)N=C(N1CCNCC1)c1ccccc1S2
c1ccc2c(c1)Nc1ccccc1S2
c1ccc2c(c1)NC1NCCC21
c1ccc2c(CC3CC4CCN3CC4)ccnc2c1
c1ccc2c(Cc3cccc4ccccc34)cccc2c1
c1ccc2c(CC3CCCCN3)ccnc2c1
c1ccc2ccccc2c1
c1ccccc1
c1ccncc1
c1nc2c(s1)CCCC2
c1ncc2cn[nH]c2n1
c1ncc2ncn(C3CCCO3)c2n1
c1ncn(C2CCCO2)n1
N=C(C(=O)NC1C(=O)N2C=C(CSc3nccs3)CSC12)c1cscn1
N=C(C(=O)NC1C(=O)N2C=CCSC12)c1cscn1
O=C(c1ccccc1)c1coc2ccccc12
O=C(c1ccco1)N1CCN(c2ncc3ccccc3n2)CC1
O=C(CC12CC3CC(CC(C3)C1)C2)N1CCC2CC21
O=C(Cc1ccccc1)N(c1ccccc1)C1CCNCC1
O=C(Cc1ccccc1)NC1C(=O)N2C=C(CSc3cn[nH]n3)CSC12
O=C(Cc1ccccc1)NC1C(=O)N2C=C(CSc3nnn[nH]3)COC12
O=C(Cc1cccnc1)c1cccnc1
O=C(Cc1cccs1)NC1C(=O)N2C=CCSC12
O=C(CNCCCc1ccccc1)N1CCC2CCCC21
O=C(CNCCCc1ccccc1)N1CCC2CCCCC21
O=C(CNCCCc1ccccc1)N1CCc2ccccc2C1
O=C(CNCCCc1ccccc1)N1CCCC1
O=C(CNCCCc1ccccc1)N1CCNC1=O
O=C(NC1C(=O)N2CCSC12)c1conc1-c1ccccc1
O=C(Nc1cccc(-c2ccccn2)c1)c1ccccc1
O=C(Nc1ccccc1)c1ccccc1
O=C(Nc1ccccc1)c1cnoc1
O=C(NC1CCCCC1)NS(=O)(=O)c1ccccc1
O=C(NCc1ccccc1)C1CCN1C(=O)CC1CCCCC1
O=C(NCC1CCCN1)c1ccccc1
O=C(OC1CC2CCC(C1)[N+]21CCCC1)C(c1ccccc1)c1ccccc1
O=c1[nH]c(=O)c2[nH]cnc2[nH]1
O=c1[nH]c2ccccc2n1C1CCN(CCC(c2ccccc2)c2ccccc2)CC1
O=c1[nH]ncn1-c1ccc(N2CCN(c3ccc(OCC4COC(Cn5cncn5)(c5ccccc5)O4)cc3)CC2)cc1
O=C1C=C2CCC3C(CCC4C3CCC43CCC(=O)O3)C2CC1
O=C1C=C2CCC3C4CCCC4CCC3C2CC1
O=C1C=CC=CCCCCCCCCC=COC2Oc3ccc4cc(c(C=NN5CCNCC5)cc4c3C2=O)N1
O=C1C=CC2C(=C1)CCC1C2CCC2C1CC1OCOC12
O=C1C=CCC2CC3Cc4ccccc4C=C3C(=O)C12
O=C1C2=CC3C(=O)C=CCC3CC2Cc2ccccc21
O=C1c2ccccc2C(=O)c2cc3c(cc21)CCCC3OC1CCCCO1
O=c1cc(NCCCN2CCN(c3ccccc3)CC2)[nH]c(=O)[nH]1
O=C1CC(OC2CCCCO2)CC(OC2CCCCO2)CCCCNCCCCO1
O=c1cc[nH]c(=S)[nH]1
O=c1cc[nH]c2cc(N3CCNCC3)ccc12
O=c1cc[nH]c2cc3occc(=O)c3cc12
O=C1Cc2ccccc2CCN1CCCNCCc1ccccc1
O=C1CCC2C3Cc4cccc5c4C2(CCN3)C1O5
O=C1CCCN1
O=c1ccn(C2CC2)c2cc(N3CCNCC3)ccc12
O=c1ccn(C2CCCO2)c(=O)[nH]1
O=C1CCON1
O=C1CN(N=Cc2ccc(-c3ccccc3)o2)C(=O)N1
O=C1CN=C(c2ccccc2)c2ccccc2N1
O=C1N=CC(C(=O)c2ccccc2)=N1
O=C1NC(=O)C(c2ccccc2)C(=O)N1
O=C1NC(c2ccccc2)c2ccccc21
O=c1nc[nH]c2[nH]cnc12
O=c1nc[nH]c2ncc(CNc3ccccc3)nc12
O=c1ncccn1C1COCS1
O=C1NCNC(=O)C1c1ccccc1
O=C1O[Pt]OC(=O)C12CCC2
O=S(=O)(Cc1ccc2[nH]ccc2c1)N1CCCC1
O=S(=O)(Nc1ccccn1)c1ccccc1
O=S(Cc1ccccn1)c1nc2ccccc2[n-]1
O=S(Cc1ccccn1)c1nc2ccccc2[nH]1
S=c1nc[nH]c2nc[nH]c12
carbon skeleton-poor-970
C(CCCCC1CCCC2CC3CCCCC3C12)CCCC1CCCCC1
C1CC2CC3CCCC45C(CCCC34)CC(C1)C25
C1CCC(C(C2CCCCC2)C2CCCCC2)CC1
C1CCC(C2C3CCCCC3CCC3CCCC32)CC1
C1CCC(C2C3CCCCC3CCC3CCCCC32)CC1
C1CCC(C2CC3CCCCC3C2)CC1
C1CCC(C2CC3CCCCC3CC3CCCCC32)CC1
C1CCC(C2CCC(CCC3CCC(CC4CCCC4)(C4CCCCC4)C3)CC2)CC1
C1CCC(C2CCC2)CC1
C1CCC(C2CCC3CCC4C5CC(C6CCCCC6)CC5CCC4C3C2)CC1
C1CCC(C2CCCC2)C1
C1CCC(C2CCCCC2)CC1
C1CCC(C2CCCCC2C2CCCC2)CC1
C1CCC(CC(C2CCCCC2)C2CCCCC2)CC1
C1CCC(CC2CCC(C3CCCCC3C3CCCC3)CC2)C1
C1CCC(CC2CCC(CC3CCCCC3CC3CCCCC3)C2)CC1
C1CCC(CC2CCC3CCCC3C2)CC1
C1CCC(CC2CCCC(CC3CCCCC3)C2)CC1
C1CCC(CC2CCCC2)CC1
C1CCC(CC2CCCC2CCCC2CCCC2)CC1
C1CCC(CC2CCCC3CCCCC32)CC1
C1CCC(CC2CCCCC2)CC1
C1CCC(CCC2CCC3CCCCC3C2)CC1
C1CCC(CCC2CCCC(CCC3CCCCC3)C2)CC1
C1CCC(CCC2CCCCC2)CC1
C1CCC(CCCC2CCC(C(C3CCCCC3)C3CCCCC3)CC2)CC1
C1CCC2(CC1)CCCC2
C1CCC2C(C1)CC1CCCC12
C1CCC2C(C1)CC1CCCCC1C1CCCCC21
C1CCC2C(C1)CCC1C3CCCC3CCC21
C1CCC2C(C1)CCC2C1CCCC1
C1CCC2C(C1)CCCC2CC1CC2CCC1CC2
C1CCC2C(C1)CCCC2CC1CCCC2CCCCC21
C1CCC2CC3CCCCC3CC2C1
C1CCC2CCCC2C1
C1CCC2CCCCC2C1
C1CCCCC1
CC(C)(CC1CCC2CCCC2C1)C1CCCC1
CC(C)(CC1CCCCC1)C1CCCCC1
CC(C1CCCC1)C1CCC(C2CCC3CCCCC3C2)CC1
CC(C1CCCCC1)C1CCC2CCCCC21
CC(CC12CC3CC(CC(C3)C1)C2)C1CCC2CC21
CC(CC1C(C)C2CC(CCC3CCCC3)CCC21)C(C)C1CCCC1
CC(CC1C(C)C2CCCC21)C1CCCC1C1CCCCC1
CC(CC1C(C)C2CCCCC21)C(C)C1CCCC1
CC(CC1CC2CCC(C1)C21CCCC1)C(C1CCCCC1)C1CCCCC1
CC(CC1CCCC(C2CCCCC2)C1)C1CCCCC1
CC(CC1CCCC1)CC1C(C)C2CCCCC21
CC(CC1CCCCC1)C(C1CCCCC1)C1CCCCC1
CC(CC1CCCCC1)C1CC2CCCCC2C1
CC(CC1CCCCC1)C1CCCC1
CC(CC1CCCCC1)C1CCCCC1
CC(CC1CCCCC1)CC(C)(C)C1CCCCC1
CC(CC1CCCCC1)CC1C(C)C2CC(CCC3CCCC3)CCC12
CC(CCC1CCCC1)C1CCCCC1
CC(CCC1CCCCC1)C1CCC1C(C)CC1CCCCC1
CC(CCCCCC1CCCCC1)C1CCC2CCCC21
CC(CCCCCC1CCCCC1)C1CCC2CCCCC21
CC(CCCCCC1CCCCC1)C1CCC2CCCCC2C1
CC(CCCCCC1CCCCC1)C1CCCC1
CC(CCCCCC1CCCCC1)C1CCCC1C
CC1C2CCCCC2C(C)C2CC3C(CC4CCCCC4)CCCC3CC12
CC1C2CCCCC2CCC2CCCCC21
CC1CC(C)C(C2CCCCC2)C(C)C1
CC1CC(C)C(CCC2CCC(C3CCCCC3)C2)C1
CC1CC(C)C2CCCC2C1
CC1CC(C)CC(CCCCC2CCC(C3CCCCC3)CC2)C1
CC1CC(C2CCCCC2)C2CCCCC12
CC1CC2CC(C)C2C1
CC1CC2CCCC2C1
CC1CC2CCCC2C2CCC3CCCCC3C12
CC1CC2CCCCC2C1C1CCC(CCC(C2CCCCC2)C2CCCCC2)CC1
CC1CC2CCCCC2CCC1CCCCCCC1CCCCC1
CC1CCC(C(C)C2CCCCC2)C1
CC1CCC(C2CC2)C2CC(C3CCCCC3)CCC12
CC1CCC(C2CCCC2)C(C)C1
CC1CCC(C2CCCCC2)C2CCCCC2C1
CC1CCC2C(CCC3C2CCC2C3CCC23CCC(C)C3)C1
CC1CCC2C(CCC3C2CCC2C4CCCC4CC23)C1
CC1CCC2C(CCC3C4CCCC4CCC23)C1
CC1CCC2C3CCCC24C1CC1CCCC(C3)C14
CC1CCCC(C)C1
CC1CCCC(C)C12CCC2
CC1CCCC(C)C1C1CCCCC1
CC1CCCC1
CC1CCCC1C1CCC(C2CCC(C3CCC(CCC4CCC(CC5CCCC5)(C5CCCCC5)C4)CC3)CC2)CC1
CC1CCCC2CC(C3CCCCC3)CCC12
CC1CCCC2CC3CC4CCCCC4C(C)C3CC12
CC1CCCC2CC3CC4CCCCC4CC3C(C)C12
CC1CCCC2CC3CCCC(C)C3CC12
CC1CCCC2CCC(CCC3CCCCC3)CC12
CC1CCCC2CCCC12
CC1CCCCC1C1CCCC1
CC1CCCCCCCCCCC(CC2CCCCC2)CC(CC2CCCCC2)C1
CC1CCCCCCCCCCCCCCCC2CC3CCC4CC(C1)C(CCC1CCCCC1)CC4C3C2C

## Sheet: drug or druglike
Name	SMI	label	Drug
Arbekacin	O1[C@H](CO)[C@@H](O)[C@H](N)[C@@H](O)[C@H]1O[C@@H]1[C@@H](O)[C@H](O[C@H]2O[C@@H](CC[C@H]2N)CN)[C@@H](N)C[C@H]1NC(=O)[C@@H](O)CCN	0	1
Azlocillin	S1[C@H]2N([C@@H](C(O)=O)C1(C)C)C(=O)[C@H]2NC(=O)[C@H](NC(=O)N1CCNC1=O)c1ccccc1	0	1
Gentamicin_C1a	O1[C@H](O[C@H]2[C@H](O)[C@@H](O[C@H]3OC[C@@](O)(C)[C@H](NC)[C@H]3O)[C@H](N)C[C@@H]2N)[C@H](N)CC[C@H]1CC	0	1
Lucifer_Yellow_CH	S(O)(=O)(=O)c1cc2c3c(cc(S(O)(=O)=O)cc3c1N)C(=O)N(NNC(=O)NN)C2=O	0	0
Meropenem	S([C@@H]1N[C@@H](CC1)C(=O)N(C)C)C=1[C@@H]([C@H]2N(C=1C(O)=O)C(=O)[C@@H]2[C@@H](O)C)C	0	1
Mezlocillin	S1[C@@H]2N([C@@H](C(O)=O)C1(C)C)C(=O)[C@@H]2NC(=O)[C@@H](NC(=O)N1CCN(S(=O)(=O)C)C1=O)c1ccccc1	0	1
Netilmicin	O1[C@@H](O[C@H]2[C@H](O)[C@@H](O[C@H]3OC[C@@](O)(C)[C@H](NC)[C@H]3O)[C@H](NCC)C[C@@H]2N)[C@@H](N)CC=C1CN	0	1
Pentamidine	O(CCCCCOc1ccc(cc1)C(N)=N)c1ccc(cc1)C(N)=N	0	1
Raffinose	O1[C@](O[C@H]2O[C@H](CO[C@H]3O[C@H](CO)[C@H](O)[C@H](O)[C@H]3O)[C@@H](O)[C@H](O)[C@H]2O)(CO)[C@@H](O)[C@H](O)[C@H]1CO	0	0
Streptozocin	O1[C@H](CO)[C@@H](O)[C@H](O)[C@@H](NC(=O)N(N=O)C)[C@H]1O	0	1
Vancomycin	Clc1c2Oc3cc4[C@H](NC(=O)[C@@H](NC(=O)[C@@H](NC(=O)[C@H](NC)CC(C)C)[C@H](O)c(c1)cc2)CC(=O)N)C(=O)N[C@@H]1c2cc(-c5c(cc(O)cc5O)[C@H](NC(=O)[C@@H](NC1=O)[C@@H](O)c1cc(Cl)c(Oc(c4)c3O[C@@H]3O[C@H](CO)[C@H](O)[C@@H](O)[C@H]3O[C@H]3O[C@@H](C)[C@H](O)[C@@](N)(C3)C)cc1)C(O)=O)c(O)cc2	0	1
alcuronium chloride	OCC=C1C2C=3C4N(C=C5C6CC7[N+](CC6=CCO)(CCC67C5N(C=3)c3c6cccc3)CC=C)c3c(C45C([N+](C1)(CC5)CC=C)C2)cccc3	0	1
atracurium	O(C)c1cc(ccc1OC)CC1[N+](CCc2c1cc(OC)c(OC)c2)(CCC(OCCCCCOC(=O)CC[N+]1(CCc2c(cc(OC)c(OC)c2)C1Cc1cc(OC)c(OC)cc1)C)=O)C	0	1
cefpirome	s1cc(nc1N)/C(=N/OC)/C(=O)NC1C2SCC(C[n+]3ccccc3)=C(N2C1=O)C(O)=O	0	1
ceftazidime	s1cc(nc1N)/C(=N/OC(C(O)=O)(C)C)/C(=O)NC1C2SCC(C[n+]3ccccc3)=C(N2C1=O)C(O)=O	0	1
mivacurium	O(C)c1c(OC)cc(cc1OC)CC1[N+](CCc2c1cc(OC)c(OC)c2)(CCCOC(=O)CC\C=C\CCC(OCCC[N+]1(CCc2c(cc(OC)c(OC)c2)C1Cc1cc(OC)c(OC)c(OC)c1)C)=O)C	0	1
tubocurarine	O1c2cc3C([N+](CCc3cc2OC)(C)C)Cc2ccc(Oc3c4C([N+](CCc4cc(OC)c3O)(C)C)Cc3cc1c(O)cc3)cc2	0	1
cefamandole_nafate	S1[C@H]2N(C(C(=O)[O-])=C(C1)CSc1nnnn1C)C(=O)[C@H]2NC(=O)[C@H](OC=O)c1ccccc1	0	1
ceforanide	S1[C@H]2N(C(C(O)=O)=C(C1)CSc1nnnn1CC(O)=O)C(=O)[C@H]2NC(=O)Cc1ccccc1CN	0	1
cephalothin	s1cccc1CC(=O)N[C@H]1[C@H]2SCC(COC(=O)C)=C(N2C1=O)C(O)=O	0	1
colestipol	[NH2+](CC[NH2+]CC[NH3+])CC[NH2+]CC[NH3+]	0	1
dapiprazole	n12CCCCc1nnc2CCN1CCN(CC1)c1ccccc1C	0	1
daunorubicin hydrochloride	O1C(C)C(O)C(N)CC1OC1CC(O)(Cc2c1c(O)c1c(C(=O)c3c(C1=O)c(OC)ccc3)c2O)C(=O)C	0	1
dopamine hydrochloride	Oc1cc(ccc1O)CCN	0	1
epirubicin hydrochloride	O1C(C)C(O)C(N)CC1OC1CC(O)(Cc2c1c(O)c1c(C(=O)c3c(C1=O)c(OC)ccc3)c2O)C(=O)CO	0	1
idoxuridine	IC1=CN(C2OC(CO)C(O)C2)C(=O)NC1=O	0	1
iotroxate	Ic1c(NC(=O)COCCOCCOCC(=O)Nc2c(C(O)=O)c(I)cc(I)c2I)c(C(O)=O)c(I)cc1I	0	0
leuprolide	Oc1ccc(cc1)CC(NC(=O)C(NC(=O)C(NC(=O)C(NC(=O)C1NC(=O)CC1)Cc1[nH]cnc1)Cc1c2c([nH]c1)cccc2)CO)C(=O)NC(C(C)C)C(=O)NC(C(C)C)C(=O)NC(CCCN=C(N)N)C(=O)N1CCCC1C(=O)NCC	0	1
nafarelin	Oc1ccc(cc1)CC(NC(=O)C(NC(=O)C(NC(=O)C(NC(=O)C1NC(=O)CC1)Cc1[nH]cnc1)Cc1c2c([nH]c1)cccc2)CO)C(=O)NC(Cc1cc2c(cc1)cccc2)C(=O)NC(CC(C)C)C(=O)NC(CCCNC(N)=N)C(=O)N1CCCC1C(=O)NCC(=O)N	0	1
octreoide	S1SCC(NC(=O)C(NC(=O)C(NC(=O)C(NC(=O)C(NC(=O)C(NC(=O)C(N)Cc2ccccc2)C1)Cc1ccccc1)Cc1c2c([nH]c1)cccc2)CCCCN)C(O)C)C(=O)NC(C(O)C)CO	0	0
piperacillin	S1[C@H]2N([C@@H](C(O)=O)C1(C)C)C(=O)[C@H]2NC(=O)[C@H](NC(=O)N1CCN(CC)C(=O)C1=O)c1ccccc1	0	1
suramin sodium	S(O)(=O)(=O)c1c2c(cc(S(O)(=O)=O)c1)c(S(O)(=O)=O)ccc2NC(=O)c1cc(NC(=O)c2cc(NC(=O)Nc3cc(ccc3)C(=O)Nc3cc(ccc3C)C(=O)Nc3c4c(cc(S(O)(=O)=O)cc4S(O)(=O)=O)c(S(O)(=O)=O)cc3)ccc2)c(cc1)C	0	1
terlipressin	S1SCC(NC(=O)C(NC(=O)C(NC(=O)C(NC(=O)C(NC(=O)C(NC(=O)CNC(=O)CNC(=O)CN)C1)Cc1ccc(O)cc1)Cc1ccccc1)CCC(=O)N)CC(=O)N)C(=O)N1CCCC1C(=O)NC(CCCCN)C(=O)NCC(=O)N	0	1
vidarabine	O1[C@H](CO)[C@@H](O)[C@H](O)[C@@H]1n1c2ncnc(N)c2nc1	0	1
Alendronic_acid	P(O)(O)(=O)C(P(O)(O)=O)(O)CCCN	0	1
Aztreonam	s1cc(nc1N)/C(=N\OC(C(O)=O)(C)C)/C(=O)N[C@H]1[C@@H](N(S(O)(=O)=O)C1=O)C	0	1
Ceftriaxone	s1cc(nc1N)/C(=N/OC)/C(=O)N[C@H]1[C@H]2SCC(CSC3=NC(=O)C(=O)NN3C)=C(N2C1=O)C(O)=O	0	1
Kanamycin	O1[C@@H](CN)[C@H](O)[C@H](O)[C@H](O)[C@H]1O[C@H]1[C@H](O)[C@@H](O[C@H]2O[C@@H](CO)[C@@H](O)[C@H](N)[C@H]2O)[C@H](N)C[C@@H]1N	0	1
Risedronic_acid	P(O)(O)(=O)C(P(O)(O)=O)(O)Cc1cccnc1	0	1
Streptomycin	O1[C@@H](CO)[C@H](O)[C@H](O)[C@H](NC)[C@@H]1O[C@H]1[C@@](O)(C=O)[C@@H](O[C@@H]1O[C@@H]1[C@@H](NC(N)=N)[C@H](O)[C@@H](NC(N)=N)[C@H](O)[C@H]1O)C	0	1
cromoglicate sodium	O1c2c(C(=O)C=C1C(O)=O)c(OCC(O)COc1c3c(OC(=CC3=O)C(O)=O)ccc1)ccc2	0	1
sucralfate	S(OC1C(OS(=O)(=O)[O-])C(OC(OC2(OC(OS(=O)(=O)[O-])C(OS(=O)(=O)[O-])C2OS(=O)(=O)[O-])COS(=O)(=O)[O-])C1OS(=O)(=O)[O-])COS(=O)(=O)[O-])(=O)(=O)[O-]	0	1
ouabain	O1C(C)C(O)C(O)C(O)C1OC1CC2(O)CCC3C(C2(CO)C(O)C1)C(O)CC1(C)C(CCC13O)C1=CC(OC1)=O	0	1
neostigmine bromide	O(C(=O)N(C)C)c1cc([N+](C)(C)C)ccc1	0	1
Acarbose	O1[C@H](C)[C@@H](N[C@H]2C=C(CO)[C@@H](O)[C@H](O)[C@H]2O)[C@H](O)[C@@H](O)[C@H]1O[C@H]1[C@H](O)[C@@H](O)[C@H](O[C@@H]1CO)O[C@@H]([C@H](O)CO)[C@@H](O)[C@@H](O)C=O	0	1
iothalamate sodium	Ic1c(C(=O)NC)c(I)c(NC(=O)C)c(I)c1C(O)=O	0	1
teicoplanin	Clc1c2Oc3cc4C(NC(=O)C5NC(=O)C(NC(=O)C(N)c6cc(Oc7cc(O)cc5c7)c(O)cc6)Cc5cc(Cl)c(Oc(c4)c3O)cc5)C(=O)NC3c4cc(-c5c(cc(O)cc5O)C(NC(=O)C(NC3=O)C(O)c(c1)cc2)C(O)=O)c(O)cc4	0	1
olsalazine	Oc1ccc(N\N=C\2/C=C(C(O)=O)C(=O)C=C/2)cc1C(O)=O	0	1
Amphotericin B	O1[C@@H](C)[C@H](C)[C@H](O)[C@H](\C=C/C=C\C=C\C=C\C=C\C=C\C=C\[C@H](O[C@@H]2O[C@H](C)[C@@H](O)[C@H](N)[C@@H]2O)C[C@@H]2O[C@@](O)(C[C@H](O)[C@H]2C(O)=O)C[C@H](O)C[C@H](O)[C@@H](O)CC[C@@H](O)C[C@@H](O)CC1=O)C	0	1
Clodronate	ClC(Cl)(P(O)(O)=O)P(O)(O)=O	0	1
Neomycin	O1[C@@H](CN)[C@@H](O)[C@H](O)[C@@H](N)[C@H]1O[C@H]1[C@@H](O)[C@@H](O[C@@H]1CO)O[C@@H]1[C@H](O[C@@H]2O[C@H](CN)[C@@H](O)[C@H](O)[C@H]2N)[C@@H](N)C[C@H](N)[C@@H]1O	0	1
cidofovir	P(O)(O)(=O)CO[C@@H](CN1C=CC(=NC1=O)N)CO	0	1
latamoxef disodium	S(CC=1COC2N(C(=O)C2(OC)NC(=O)C(C(O)=O)c2ccc(O)cc2)C=1C(O)=O)c1nnnn1C	0	1
Cefotaxime	s1cc(nc1N)/C(=N/OC)/C(=O)N[C@H]1[C@H]2SCC(COC(=O)C)=C(N2C1=O)C(O)=O	0	1
Chlorhexidine	Clc1ccc(NC(NC(NCCCCNC(NC(Nc2ccc(Cl)cc2)=N)=N)=N)=N)cc1	0	1
Diatrizoate	Ic1c(C(O)=O)c(I)c(NC(=O)C)c(I)c1NC(=O)C	0	1
Edetic_acid	OC(=O)CN(CCN(CC(O)=O)CC(O)=O)CC(O)=O	0	1
Etidronate	P(O)(O)(=O)C(P(O)(O)=O)(O)C	0	1
Gentamincin_C1	O1[C@H](O[C@H]2[C@H](O)[C@@H](O[C@H]3OC[C@@](O)(C)[C@H](NC)[C@H]3O)[C@H](N)C[C@@H]2N)[C@H](N)CC[C@H]1[C@H](NC)C	0	1
Imipenem	S(CCNC=N)C=1C[C@H]2N(C=1C(O)=O)C(=O)[C@@H]2[C@H](O)C	0	1
Iotroxic_acid	Ic1c(C(O)=O)c(I)cc(I)c1NC(=O)COCCOCCOCC(=O)Nc1c(I)c(C(O)=O)c(I)cc1I	0	1
Mitoxantrone	Oc1c2c(C(=O)c3c(C2=O)c(NCCNCCO)ccc3NCCNCCO)c(O)cc1	0	1
Pamidronic_acid	P(O)(O)(=O)C(P(O)(O)=O)(O)CCN	0	1
Phthalylsulfathiazole	s1ccnc1NS(=O)(=O)c1ccc(NC(=O)c2ccccc2C(O)=O)cc1	0	0
Succinylsulfathiazole	s1ccnc1NS(=O)(=O)c1ccc(NC(=O)CCC(O)=O)cc1	0	1
Sulbactam	S1(=O)(=O)[C@H]2N([C@H](C(O)=O)C1(C)C)C(=O)C2	0	1
Ticarcillin	S1[C@H]2N([C@@H](C(O)=O)C1(C)C)C(=O)[C@H]2NC(=O)[C@H](C(O)=O)c1ccsc1	0	1
cefuroxime	S1[C@H]2N(C(C(O)=O)=C(C1)COC(=O)N)C(=O)[C@H]2NC(=O)\C(=N/OC)\c1occc1	0	1
ganciclovir sodium	Oc1nc(nc2n(cnc12)COC(CO)CO)N	0	1
hbed	Oc1ccccc1CN(CCN(Cc1ccccc1O)CC(O)=O)CC(O)=O	0	0
sennoside	O1C(CO)C(O)C(O)C(O)C1Oc1c2c(ccc1)C(c1c(C2=O)c(O)cc(c1)C(O)=O)C1c2c(C(=O)c3c1cccc3O)c(OC1OC(CO)C(O)C(O)C1O)ccc2	0	1
Tiludronic_acid	Clc1ccc(cc1)CC(P(O)(O)=O)P(O)(O)=O	0	1
atovaquone	Clc1ccc(cc1)C1CCC(CC1)C=1C(=O)C(=O)c2c(cccc2)C=1O	0	1
probucol	S(C(Sc1cc(C(C)(C)C)c(O)c(c1)C(C)(C)C)(C)C)c1cc(C(C)(C)C)c(O)c(c1)C(C)(C)C	0	1
xamoterol	O1CCN(CC1)C(=O)NCCNCC(O)COc1ccc(O)cc1	0	1
distigmine	O(C(=O)N(CCCCCCN(C(Oc1ccc[n+](c1)C)=O)C)C)c1ccc[n+](c1)C	0	1
Cefmetazole	S1[C@H]2N(C(C(O)=O)=C(C1)CSc1nnnn1C)C(=O)[C@@]2(OC)NC(=O)CSCC#N	0	1
butylscopolamine	O1C2C3[N+](C(CC(OC(=O)C(CO)c4ccccc4)C3)C12)(CCCC)C	0	1
propantheline	O1c2c(cccc2)C(c2c1cccc2)C(OCC[N+](C(C)C)(C(C)C)C)=O	0	1
levocarnitine	OC(CC(=O)[O-])C[N+](C)(C)C	0	1
mecillinam	S1C2N(C(C(O)=O)C1(C)C)C(=O)C2N=CN1CCCCCC1	0	1
sequestren	O=C([O-])CN(CCN(CC(=O)[O-])CC(=O)[O-])CC(=O)[O-]	0	0
Acamprosate	S(O)(=O)(=O)CCCNC(=O)C	0	1
phenoperidine hydrochloride	O(C(=O)C1(CCN(CC1)CCC(O)c1ccccc1)c1ccccc1)CC	0	1
azosemide	Clc1cc(NCc2sccc2)c(cc1S(=O)(=O)N)-c1nn[nH]n1	0	1
tacrolimus	O1[C@H](/C(=C/[C@H]2C[C@@H](OC)[C@H](O)CC2)/C)[C@H](C)[C@@H](O)CC(=O)[C@@H](\C=C(/C[C@@H](C[C@H](OC)[C@H]2O[C@](O)([C@@H](C[C@@H]2OC)C)C(=O)C(=O)N2[C@@H](CCCC2)C1=O)C)\C)CC=C	0	1
oxitropium	O1C2C3[N+](C(CC(OC(=O)C(CO)c4ccccc4)C3)C12)(CC)C	0	1
adefovir	P(O)(O)(=O)COCCn1c2ncnc(N)c2nc1	0	1
etravirine	Brc1c(nc(nc1Oc1c(cc(cc1C)C#N)C)Nc1ccc(cc1)C#N)N	0	1
k-strophanthoside	O1C(COC2OC(CO)C(O)C(O)C2O)C(O)C(O)C(O)C1OC1C(OC)CC(OC1O)OC1CC2(O)CCC3C(CCC4(C)C(CCC34O)C3=CC(OC3)=O)C2(CC1)C=O	0	0
orlistat	O1[C@@H](C[C@@H](OC(=O)[C@@H](NC=O)CC(C)C)CCCCCCCCCCC)[C@H](CCCCCC)C1=O	0	1
methylscopolamine	O1[C@H]2[C@H]3[N+]([C@@H]([C@@H]12)CC(OC(=O)[C@H](CO)c1ccccc1)C3)(C)C	0	1
glycopyrrolate	O(C(=O)C(O)(C1CCCC1)c1ccccc1)C1CC[N+](C1)(C)C	0	1
foscarnet	P(O)(O)(=O)C(O)=O	0	1
indinavir sulfate	OC1Cc2c(cccc2)C1NC(=O)C(Cc1ccccc1)CC(O)CN1CCN(CC1C(=O)NC(C)(C)C)Cc1cccnc1	0	1
Cilazaprilat	O=C1N2N(CCC[C@@H]1N[C@@H](CCc1ccccc1)C(O)=O)CCC[C@H]2C(O)=O	0	1
aciclovir	Oc1nc(nc2n(cnc12)COCCO)N	0	1
fluticasone-propionate	S(C(=O)C1(OC(=O)CC)C2(CC(O)C3(F)C(C2CC1C)CC(F)C1=CC(=O)C=CC13C)C)CF	0	1
pranlukast	O1c2c(cccc2NC(=O)c2ccc(OCCCCc3ccccc3)cc2)C(=O)C=C1c1nn[nH]n1	0	1
auranofin	SC1OC(COC(=O)C)C(OC(=O)C)C(OC(=O)C)C1OC(=O)C	0	1
enalaprilat	OC(=O)[C@H]1N(CCC1)C(=O)[C@@H](N[C@@H](CCc1ccccc1)C(O)=O)C	0	1
ergoloid_mesylate	O1C(NC(=O)C2CC3C(N(C2)C)Cc2c4c3cccc4[nH]c2)(C(C)C)C(=O)N2C(C(CC)(C)C)C(=O)N3C(CCC3)C12O	0	1
phenoxybenzamine hydrochloride	ClCCN(Cc1ccccc1)C(COc1ccccc1)C	0	1
pirenzepine hydrochloride	O=C1Nc2cccnc2N(c2c1cccc2)C(=O)CN1CCN(CC1)C	0	1
Lincomycin	S(C)[C@H]1O[C@H]([C@@H](NC(=O)[C@H]2N(C[C@@H](C2)CCC)C)[C@@H](O)C)[C@H](O)[C@H](O)[C@H]1O	0	1
cyclosporin	O=C1N(C)C(C(O)C(C\C=C\C)C)C(=O)NC(CC)C(=O)N(CC(=O)N(C)C(CC(C)C)C(=O)NC(C(C)C)C(=O)N(C)C(CC(C)C)C(=O)NC(C)C(=O)NC(C)C(=O)N(C)C(CC(C)C)C(=O)N(C)C(CC(C)C)C(=O)N(C)C1C(C)C)C	0	1
fluorouracil	FC1=CNC(=O)NC1=O	0	1
pralidoxime	O\N=C\c1[n+](cccc1)C	0	1
benzylpenicillin	S1[C@H]2N([C@@H](C(O)=O)C1(C)C)C(=O)[C@H]2NC(=O)Cc1ccccc1	1	1
penicillin g	S1C2N(C(C(O)=O)C1(C)C)C(=O)C2CC(=O)Cc1ccccc1	1	1
reserpine	O(C)C1C(C2C(CC1OC(=O)c1cc(OC)c(OC)c(OC)c1)CN1C(C2)c2[nH]c3cc(OC)ccc3c2CC1)C(OC)=O	1	1
saquinavir mesilate	OC(C(NC(=O)C(NC(=O)c1nc2c(cc1)cccc2)CC(=O)N)Cc1ccccc1)CN1CC2C(CC1C(=O)NC(C)(C)C)CCCC2	1	1
fosfomycin	P(O)(O)(=O)C1O[C@H]1C	1	1
lovastatin	O1[C@@H](C[C@@H](O)CC1=O)CC[C@@H]1[C@@H]2C(=C[C@@H](C[C@@H]2OC(=O)[C@H](CC)C)C)C=C[C@@H]1C	1	1
AAFC	FC1=CN2[C@@H]3O[C@H](CO)[C@@H](O)[C@@H]3OC2=NC1=N	1	0
Nadolol	O(C[C@@H](O)CNC(C)(C)C)c1c2C[C@H](O)[C@H](O)Cc2ccc1	1	1
fosinopril sodium	P(OC(OC(=O)CC)C(C)C)(=O)(CCCCc1ccccc1)CC(=O)N1CC(CC1C(O)=O)C1CCCCC1	1	1
pravastatin	O(C(=O)[C@H](CC)C)[C@@H]1[C@H]2C(=C[C@@H](O)C1)C=C[C@H](C)[C@@H]2CC[C@@H](O)C[C@@H](O)CC(O)=O	1	1
tioguanine	S=C1NC(=Nc2[nH]cnc12)N	1	1
Dihydroergotamine	O1[C@](NC(=O)[C@@H]2C[C@H]3[C@H](N(C2)C)Cc2c4c3cccc4[nH]c2)(C)C(=O)N2[C@@H](Cc3ccccc3)C(=O)N3[C@@H](CCC3)[C@]12O	1	1
Erythromycin	O1[C@H](CC)[C@](O)(C)[C@H](O)[C@@H](C)C(=O)[C@@H](C[C@](O)(C)[C@H](O[C@@H]2O[C@@H](C[C@H](N(C)C)[C@H]2O)C)[C@@H](C)[C@H](O[C@@H]2O[C@@H](C)[C@H](O)[C@](OC)(C2)C)[C@@H](C)C1=O)C	1	1
ampicillin	S1C2N(C(C(O)=O)C1(C)C)C(=O)C2NC(=O)C(N)c1ccccc1	1	1
ascorbic acid	O1C(C(O)CO)C(=O)C(O)=C1O	1	1
bromocriptine mesilate	Brc1[nH]c2c3c1CC1N(CC(C=C1c3ccc2)C(=O)NC1(OC2(O)N(C(CC(C)C)C(=O)N3C2CCC3)C1=O)C(C)C)C	1	1
candoxatril	O(C(=O)[C@@H](CC1(CCCC1)C(=O)NC1CCC(CC1)C(O)=O)COCCOC)c1cc2CCCc2cc1	1	0
ciclosporin	O=C1N(C)C(C(O)C(CC=CC)C)C(=O)NC(CC)C(=O)N(CC(=O)N(C)C(CC(C)C)C(=O)NC(C(C)C)C(=O)N(C)C(CC(C)C)C(=O)NC(C)C(=O)NC(C)C(=O)N(C)C(CC(C)C)C(=O)N(C)C(CC(C)C)C(=O)N(C)C1C(C)C)C	1	1
etretinate	O(C)c1cc(C)c(C=CC(=CC=CC(=CC(OCC)=O)C)C)c(C)c1C	1	1
frovatriptan	O=C(N)c1cc2c3C[C@H](NC)CCc3[nH]c2cc1	1	1
mitotane	Clc1ccccc1C(C(Cl)Cl)c1ccc(Cl)cc1	1	1
penicillamine	SC(C(N)C(O)=O)(C)C	1	1
promazine	S1c2c(N(c3c1cccc3)CCCN(C)C)cccc2	1	1
Famotidine	s1cc(nc1N=C(N)N)CSCC/C(=N/S(=O)(=O)N)/N	1	1
methyldopa	Oc1cc(ccc1O)CC(N)(C(O)=O)C	1	1
cefcanel	s1c(nnc1SCC=1CS[C@H]2N(C=1C(O)=O)C(=O)[C@H]2NC(=O)[C@H](O)c1ccccc1)C	1	1
Metaproterenol	Oc1cc(cc(O)c1)[C@H](O)CNC(C)C	1	1
benazepril	O=C1N(c2c(CCC1NC(CCc1ccccc1)C(OCC)=O)cccc2)CC(O)=O	1	1
lercanidipine	O(C(=O)C=1C(C(C(OC)=O)=C(NC=1C)C)c1cc([N+](=O)[O-])ccc1)C(CN(CCC(c1ccccc1)c1ccccc1)C)(C)C	1	1
delapril	O(CC)C(=O)[C@@H](N[C@H](C(=O)N(CC(O)=O)C1Cc2c(C1)cccc2)C)CCc1ccccc1	1	1
Cymarin	O1CC(=CC1=O)[C@H]1CC[C@@]2(O)[C@H]3[C@H](CC[C@@]12C)[C@]1(CC[C@H](O[C@@H]2O[C@@H](C)[C@H](O)[C@H](OC)C2)C[C@@]1(O)CC3)C=O	1	0
cefetamet	s1cc(nc1N)/C(=N/OC)/C(=O)N[C@H]1[C@H]2SCC(C)=C(N2C1=O)C(O)=O	1	0
Rimiterol	Oc1cc(ccc1O)[C@H](O)[C@@H]1NCCCC1	1	0
chlorothiazide	Clc1cc2NC=NS(=O)(=O)c2cc1S(=O)(=O)N	1	1
Atenolol	O(CC(O)CNC(C)C)c1ccc(cc1)CC(=O)N	1	1
Cefpodoxime_proxetil	s1cc(nc1N)/C(=N\OC)/C(=O)N[C@H]1[C@H]2SCC(COC)=C(N2C1=O)C(O[C@H](OC(OC(C)C)=O)C)=O	1	1
Guanoxan	O1c2c(OC[C@H]1CNC(N)=N)cccc2	1	0
amiloride	Clc1nc(C(=O)\N=C(\N)/N)c(nc1N)N	1	1
capreomycin	O=C/1N[C@@H]([C@@H]2NC(=NCC2)N)C(=O)NC[C@H](N)C(=O)N[C@@H](C)C(=O)N[C@@H](CNC(=O)C[C@@H](N)CCCN)C(=O)N\C\1=C\NC(=O)N	1	1
clopidogrel	Clc1ccccc1[C@H](N1CCc2sccc2C1)C(OC)=O	1	1
entacapone	Oc1c([N+](=O)[O-])cc(cc1O)\C=C(\C(=O)N(CC)CC)/C#N	1	1
etoposide	O1C[C@H]2[C@@H]([C@@H](c3c(cc4OCOc4c3)[C@H]2O[C@@H]2O[C@H]3[C@@H](O[C@@H](OC3)C)[C@H](O)[C@H]2O)c2cc(OC)c(O)c(OC)c2)C1=O	1	1
ranitidine hydrochloride	S(Cc1oc(cc1)CN(C)C)CCNC(NC)=C[N+](=O)[O-]	1	1
rifabutin	O1c2c3c4c(c(O)c2C)C(=O)C(NC(=O)C(=CC=CC(C)C(O)C(C)C(O)C(C)C(OC(=O)C)C(C)C(OC)C=COC1(C)C3=O)C)=C1NC2(N=C14)CCN(CC2)CC(C)C	1	1
tegaserod	O(C)c1cc2c([nH]cc2\C=N\NC(NCCCCC)=N)cc1	1	1
troglitazone	S1C(Cc2ccc(OCC3(Oc4c(CC3)c(C)c(O)c(C)c4C)C)cc2)C(=O)NC1=O	1	1
Metformin	N(C(NC(N)=N)=N)(C)C	1	1
triamterene	n1c(N)c2nc(-c3ccccc3)c(nc2nc1N)N	1	1
Eflornithine	FC(F)[C@](N)(CCCN)C(O)=O	1	1
levothyroxine sodium	Ic1cc(cc(I)c1Oc1cc(I)c(O)c(I)c1)CC(N)C(O)=O	1	1
Dipyridamole	OCCN(CCO)c1nc(N2CCCCC2)c2nc(nc(N3CCCCC3)c2n1)N(CCO)CCO	1	1
loxoprofen	O=C1CCCC1Cc1ccc(cc1)C(C(O)=O)C	1	1
vigabatrin	OC(=O)CCC(N)C=C	1	1
Cilazapril	O=C1N2N(CCC[C@@H]1N[C@@H](CCc1ccccc1)C(OCC)=O)CCC[C@H]2C(O)=O	1	1
penicillin_v	S1[C@H]2N([C@@H](C(O)=O)C1(C)C)C(=O)[C@H]2NC(=O)COc1ccccc1	1	1
sulphasalazine	S(=O)(=O)(Nc1ncccc1)c1ccc(N\N=C/2\C=C(C(O)=O)C(=O)C=C\2)cc1	1	0
Fenoterol	Oc1cc(cc(O)c1)[C@H](O)CN[C@H](Cc1ccc(O)cc1)C	1	1
Ivermectin	O1[C@H]2C[C@@]3(O[C@@H]4[C@H](C3)[C@H](C)[C@@H]4[C@H](CC)C)O[C@H](C\C=C(\C)/[C@H](O[C@@H]3O[C@H](C)[C@@H](O[C@@H]4O[C@@H](C)[C@H](O)[C@@H](OC)C4)[C@H](OC)C3)[C@@H](\C=C\C=C\3/CO[C@@H]4[C@@H](O)C(=C[C@@H]([C@]/34O)C1=O)C)C)C2	1	1
Oxycodone	O1[C@@H]2[C@]34CCN([C@H](Cc5c3c1c(OC)cc5)[C@]4(O)CCC2=O)C	1	1
Pirbuterol	Oc1ccc(nc1CO)[C@H](O)CNC(C)(C)C	1	1
Reproterol	Oc1cc(cc(O)c1)[C@H](O)CNCCCn1c2c(nc1)N(C)C(=O)N(C)C2=O	1	0
Ziprasidone	Clc1cc2NC(=O)Cc2cc1CCN1CCN(CC1)c1nsc2c1cccc2	1	1
carbidopa	Oc1cc(ccc1O)CC(NN)(C(O)=O)C	1	1
cefixime	s1cc(nc1N)C(=NOCC(O)=O)C(=O)NC1C2SCC(C=C)=C(N2C1=O)C(O)=O	1	1
gestrinone	OC1(CCC2C3C(=C4C(=CC(=O)CC4)CC3)C=CC12CC)C#C	1	1
pergolide mesilate	S(CC1CC2C(N(C1)CCC)Cc1c3c2cccc3[nH]c1)C	1	1
progabide	Clc1ccc(cc1)/C(/NCCCC(=O)N)=C\1/C=C(F)C=CC/1=O	1	1
quinapril hydrochloride	O(C(=O)C(NC(C(=O)N1Cc2c(CC1C(O)=O)cccc2)C)CCc1ccccc1)CC	1	1
raloxifene	s1c2c(ccc(O)c2)c(C(=O)c2ccc(OCCN3CCCCC3)cc2)c1-c1ccc(O)cc1	1	1
thioridazine	S1c2c(N(c3c1cccc3)CCC1N(CCCC1)C)cc(SC)cc2	1	1
Furosemide	Clc1cc(NCc2occc2)c(cc1S(=O)(=O)N)C(O)=O	1	1
quinaprilat	OC(=O)[C@H]1N(Cc2c(C1)cccc2)C(=O)[C@@H](N[C@@H](CCc1ccccc1)C(O)=O)C	1	1
Sulfasalazine	S(=O)(=O)(Nc1ncccc1)c1ccc(\N=N\c2cc(C(O)=O)c(O)cc2)cc1	1	1
Terbutaline	Oc1cc(cc(O)c1)[C@H](O)CNC(C)(C)C	1	1
Metolazone	Clc1cc2N[C@H](N(c3ccccc3C)C(=O)c2cc1S(=O)(=O)N)C	1	1
Chlorthalidone	Clc1ccc(cc1S(=O)(=O)N)[C@@]1(O)NC(=O)c2c1cccc2	1	1
formoterol_fumarate	O(C)c1ccc(cc1)C[C@H](NC[C@H](O)c1cc(NC=O)c(O)cc1)C	1	0
loperamide hydrochloride	Clc1ccc(cc1)C1(O)CCN(CC1)CCC(C(=O)N(C)C)(c1ccccc1)c1ccccc1	1	1
sematilide	S(=O)(=O)(Nc1ccc(cc1)C(=O)NCCN(CC)CC)C	1	0
vitamin_e	O1c2c(CC[C@]1(CCC[C@@H](CCC[C@@H](CCCC(C)C)C)C)C)c(C)c(O)c(C)c2C	1	1
Hydroflumethiazide	S(=O)(=O)(N)c1cc2S(=O)(=O)NCNc2cc1C(F)(F)F	1	1
Sumatriptan	S(=O)(=O)(NC)Cc1cc2c([nH]cc2CCN(C)C)cc1	1	1
Hydrochlorothiazide	Clc1cc2NCNS(=O)(=O)c2cc1S(=O)(=O)N	1	1
Mibefradil	Fc1cc2c(cc1)[C@H](C(C)C)[C@](OC(=O)COC)(CC2)CCN(CCCc1[nH]c2c(n1)cccc2)C	1	1
bosentan	S(=O)(=O)(Nc1nc(nc(OCCO)c1Oc1ccccc1OC)-c1ncccn1)c1ccc(cc1)C(C)(C)C	1	1
Anagrelide	Clc1c2CN3CC(=O)NC3=Nc2ccc1Cl	1	1
Benserazide	Oc1c(O)c(O)ccc1CNNC(=O)[C@H](N)CO	1	0
Bromhexine	Brc1cc(Br)cc(CN(C)C2CCCCC2)c1N	1	1
Etodolac	O1CCc2c([nH]c3c2cccc3CC)[C@@]1(CC(O)=O)CC	1	1
Famciclovir	O(C(=O)C)CC(CCn1c2nc(ncc2nc1)N)COC(=O)C	1	1
Isocarboxazid	o1nc(cc1C)C(=O)NNCc1ccccc1	1	1
Mianserin	N12[C@@H](c3c(Cc4c1cccc4)cccc3)CN(CC2)C	1	1
Moxisylyte	O(C(=O)C)c1cc(C(C)C)c(OCCN(C)C)cc1C	1	1
Naratriptan	S(=O)(=O)(NC)CCc1cc2cc([nH]c2cc1)C1CCN(CC1)C	1	1
Pimozide	Fc1ccc(cc1)C(CCN1CCC(N2c3c(NC2=O)cccc3)CC1)c1ccc(F)cc1	1	1
imidapril	O=C1N(C(=O)[C@@H](N[C@@H](CCc2ccccc2)C(OCC)=O)C)[C@@H](CN1C)C(O)=O	1	0
methotrexate	OC(=O)CC[C@H](NC(=O)c1ccc(N(Cc2nc3c(nc(nc3N)N)nc2)C)cc1)C(O)=O	1	1
olopatadine_hydrochloride	O1Cc2c(cccc2)/C(/c2cc(ccc12)CC(O)=O)=C/CCN(C)C	1	1
sulfapyridine	S(=O)(=O)(Nc1ncccc1)c1ccc(N)cc1	1	1
Recainam	O=C(Nc1c(cccc1C)C)NCCCNC(C)C	1	0
norfloxacin	Fc1cc2c(N(C=C(C(O)=O)C2=O)CC)cc1N1CCNCC1	1	1
prazosin	o1cccc1C(=O)N1CCN(CC1)c1nc(N)c2cc(OC)c(OC)cc2n1	1	1
Ceftizoxime	s1cc(nc1N)/C(=N/OC)/C(=O)N[C@H]1[C@H]2SCC=C(N2C1=O)C(O)=O	1	1
Cycloserine	O1NC(=O)[C@@H](N)C1	1	1
Benzbromarone	Brc1cc(cc(Br)c1O)C(=O)c1c2c(oc1CC)cccc2	1	0
Quetiapine	S1c2c(cccc2)C(=Nc2c1cccc2)N1CCN(CC1)CCOCCO	1	1
ciprofloxacin	Fc1cc2c(N(C=C(C(O)=O)C2=O)C2CC2)cc1N1CCNCC1	1	1
spironolactone	S(C(=O)C)[C@H]1[C@H]2[C@@H]3CC[C@]4(OC(=O)CC4)[C@]3(CC[C@@H]2[C@@]2(C(=CC(=O)CC2)C1)C)C	1	1
Estramustine	ClCCN(CCCl)C(Oc1cc2CC[C@H]3[C@@H]4CC[C@H](O)[C@]4(CC[C@@H]3c2cc1)C)=O	1	1
Ketoconazole	Clc1cc(Cl)ccc1[C@]1(O[C@@H](CO1)COc1ccc(N2CCN(CC2)C(=O)C)cc1)Cn1ccnc1	1	1
Mesna	S(O)(=O)(=O)CCS	1	1
Oseltamivir	O(C(CC)CC)[C@@H]1C=C(C[C@H](N)[C@H]1NC(=O)C)C(OCC)=O	1	1
Primidone	O=C1NCNC(=O)C1(CC)c1ccccc1	1	1
cefatrizine	S1[C@H]2N(C(C(O)=O)=C(C1)CSc1n[nH]nc1)C(=O)[C@H]2NC(=O)[C@H](N)c1ccc(O)cc1	1	0
cloxacillin	Clc1ccccc1-c1noc(C)c1C(=O)N[C@H]1[C@H]2SC(C)(C)[C@@H](N2C1=O)C(O)=O	1	1
fludarabine-phosphate	P(OCC1OC(n2c3nc(F)nc(N)c3nc2)C(O)C1O)(O)(O)=O	1	1
folic-acid	O=C1N=C(Nc2ncc(nc12)CNc1ccc(cc1)C(=O)NC(CCC(O)=O)C(O)=O)N	1	1
lodoxamide trometamol	Clc1c(NC(=O)C(O)=O)cc(cc1NC(=O)C(O)=O)C#N	1	1
oxiracetam	OC1CC(=O)N(C1)CC(=O)N	1	0
saxagliptin	OC12CC3(CC(C1)CC(C3)C2)[C@H](N)C(=O)N1[C@@H]2[C@H](C[C@H]1C#N)C2	1	1
Propylthiouracil	S=C1NC(=CC(=O)N1)CCC	1	1
xipamide	Clc1cc(O)c(cc1S(=O)(=O)N)C(=O)Nc1c(cccc1C)C	1	0
Ethylmorphine	O1[C@@H]2[C@]34[C@@H]([C@H](N(CC3)CC)Cc3c4c1c(O)cc3)C=C[C@@H]2O	1	1
Pantoprazole	S(=O)(Cc1nccc(OC)c1OC)c1[nH]c2c(n1)cc(OC(F)F)cc2	1	1
mercaptoethanesulfonic acid	S(O)(=O)(=O)CCS	1	0
Ethambutol	OC[C@@H](NCCN[C@@H](CC)CO)CC	1	1
Guanabenz	Clc1cccc(Cl)c1\C=N\NC(N)=N	1	1
Mefloquine	FC(F)(F)c1c2nc(cc(c2ccc1)[C@@H](O)[C@@H]1NCCCC1)C(F)(F)F	1	1
Zatebradin	O(C)c1cc(ccc1OC)CCN(CCCN1CCc2cc(OC)c(OC)cc2CC1=O)C	1	0
Metopirone	O=C(C(C)(C)c1cccnc1)c1cccnc1	1	1
Acetohexamide	S(=O)(=O)(NC(=O)NC1CCCCC1)c1ccc(cc1)C(=O)C	1	1
Allopurinol	Oc1ncnc2[nH]ncc12	1	1
Chlorpheniramine	Clc1ccc(N(CCN(C)C)c2ncccc2)cc1	1	1
Cyproheptadine	N1(CCC(CC1)=C1c2c(C=Cc3c1cccc3)cccc2)C	1	1
Floxacillin	Clc1cccc(F)c1-c1noc(C)c1C(=O)N[C@H]1[C@H]2SC(C)(C)[C@@H](N2C1=O)C(O)=O	1	1
Flunarizine	Fc1ccc(cc1)C(N1CCN(CC1)C\C=C\c1ccccc1)c1ccc(F)cc1	1	1
Flunisolide	F[C@H]1C2=CC(=O)C=C[C@@]2([C@@H]2[C@H]([C@H]3C[C@H]4OC(O[C@@]4(C(=O)CO)[C@]3(C[C@H]2O)C)(C)C)C1)C	1	1
Fluoxetine	FC(F)(F)c1ccc(O[C@H](CCNC)c2ccccc2)cc1	1	1
Guanadrel	O1[C@H](COC12CCCCC2)CNC(N)=N	1	1
Isoniazid	O=C(NN)c1ccncc1	1	1
Itraconazole	Clc1cc(Cl)ccc1[C@@]1(O[C@H](CO1)COc1ccc(N2CCN(CC2)c2ccc(N3C=NN([C@H](CC)C)C3=O)cc2)cc1)Cn1ncnc1	1	1
Losartan	Clc1nc(n(Cc2ccc(cc2)-c2ccccc2-c2[nH]nnn2)c1CO)CCCC	1	1
Mesalamine	Oc1ccc(N)cc1C(O)=O	1	1
Methadone	O=C(C(C[C@H](N(C)C)C)(c1ccccc1)c1ccccc1)CC	1	1
Methylphenidate	O(C(=O)[C@@H]([C@@H]1NCCCC1)c1ccccc1)C	1	1
Modafinil	S(=O)(C(c1ccccc1)c1ccccc1)CC(=O)N	1	1
Nabumetone	O(C)c1cc2c(cc(cc2)CCC(=O)C)cc1	1	1
Omeprazole	S(=O)(Cc1ncc(C)c(OC)c1C)c1nc2cc(OC)ccc2[n-]1	1	1
Oxamniquine	OCc1cc2CC[C@H](Nc2cc1[N+](=O)[O-])CNC(C)C	1	1
Pizotyline	s1c2c(cc1)C(c1c(CC2)cccc1)=C1CCN(CC1)C	1	0
Pramipexole	s1c2C[C@@H](NCCC)CCc2nc1N	1	1
Terbinafine	N(Cc1c2c(ccc1)cccc2)(C\C=C\C#CC(C)(C)C)C	1	1
Ticlopidine	Clc1ccccc1CN1CCc2sccc2C1	1	1
Trimeprazine	S1c2c(N(c3c1cccc3)C[C@H](CN(C)C)C)cccc2	1	1
Vitamin_A	OC\C=C(\C=C\C=C(\C=C\C=1C(CCCC=1C)(C)C)/C)/C	1	1
apricitabine	S1[C@@H](OC[C@@H]1N1C=CC(=NC1=O)N)CO	1	0
chlorphenamine maleate	Clc1ccc(cc1)C(CCN(C)C)c1ncccc1	1	1
clenbuterol	Clc1cc(cc(Cl)c1N)C(O)CNC(C)(C)C	1	1
etofylline	O=C1N(C)C(=O)N(c2ncn(c12)CCO)C	1	0
fenbufen	OC(=O)CCC(=O)c1ccc(cc1)-c1ccccc1	1	1
flucloxacillin	Clc1cccc(F)c1-c1noc(C)c1C(=O)N[C@H]1[C@H]2SC(C)(C)[C@@H](N2C1=O)C(O)=O	1	1
flunitrazepam	Fc1ccccc1C1=NCC(=O)N(c2c1cc([N+](=O)[O-])cc2)C	1	1
hydrocodone	O1[C@@H]2[C@]34[C@H]([C@H](N(CC3)C)Cc3c4c1c(OC)cc3)CCC2=O	1	1
hydroxyzine	Clc1ccc(cc1)C(N1CCN(CC1)CCOCCO)c1ccccc1	1	1
leflunomide	FC(F)(F)c1ccc(NC(=O)c2cnoc2C)cc1	1	1
mirtazapine	n1c2N3C(c4c(Cc2ccc1)cccc4)CN(CC3)C	1	1
retinol	OCC=C(C=CC=C(C=CC=1C(CCCC=1C)(C)C)C)C	1	1
rifampin	O1c2c3c4c(c(O)c2C)c(O)c(NC(=O)\C(=C\C=C\C(C)C(O)C(C)C(O)C(C)C(OC(=O)C)C(C)C(OC)\C=C/OC1(C)C3=O)\C)c(\C=N\N1CCN(CC1)C)c4O	1	1
tetracycline	OC=1[C@@H](N(C)C)[C@@H]2C[C@H]3C(=C(O)[C@]2(O)C(=O)C=1C(=O)N)C(=O)c1c(cccc1O)[C@]3(O)C	1	1
trimethobenzamide	O(C)c1c(OC)cc(cc1OC)C(=O)NCc1ccc(OCCN(C)C)cc1	1	1
desvenlafaxine_succinate	OC1(CCCCC1)C(CN(C)C)c1ccc(O)cc1	1	1
Piroximone	O=C1NC(C(=O)c2ccncc2)=C(N1)CC	1	0
sulfamerazine	S(=O)(=O)(Nc1nc(ccn1)C)c1ccc(N)cc1	1	1
Aspirin	O(C(=O)C)c1ccccc1C(O)=O	1	1
Ibutilide	S(=O)(=O)(Nc1ccc(cc1)[C@H](O)CCCN(CCCCCCC)CC)C	1	1
Methylprednisolone	O=C1C=C2[C@@]([C@@H]3[C@H]([C@@H]4CC[C@](O)(C(=O)CO)[C@]4(C[C@@H]3O)C)C[C@@H]2C)(C=C1)C	1	1
Mifobate	Clc1ccc(cc1)[C@H](P(OC)(OC)=O)OP(OC)(OC)=O	1	0
cyclophosphamide	ClCCN(P1(OCCCN1)=O)CCCl	1	1
Albuterol	Oc1ccc(cc1CO)[C@@H](O)CNC(C)(C)C	1	1
Milrinone	O=C1NC(C)=C(C=C1C#N)c1ccncc1	1	1
Nateglinide	OC(=O)[C@@H](NC(=O)C1CCC(CC1)C(C)C)Cc1ccccc1	1	1
acetylprocainamide	O=C(NCCN(CC)CC)c1ccc(NC(=O)C)cc1	1	0
pioglitazone	S1C(Cc2ccc(OCCc3ncc(cc3)CC)cc2)C(=O)NC1=O	1	1
pomalidomide	O=C1NC(=O)CCC1N1C(=O)c2c(cccc2N)C1=O	1	1
Bromazepam	Brc1cc2c(NC(=O)CN=C2c2ncccc2)cc1	1	1
Propiverine	O(C(=O)C(OCCC)(c1ccccc1)c1ccccc1)C1CCN(CC1)C	1	0
captopril	SCC(C(=O)N1CCCC1C(O)=O)C	1	1
ezogabine	Fc1ccc(cc1)CNc1cc(N)c(NC(OCC)=O)cc1	1	1
milnacipran	O=C(N(CC)CC)C1(CC1CN)c1ccccc1	1	1
ramelteon	O1CCc2c3c(CC[C@H]3CCNC(=O)CC)ccc12	1	1
Acetaminophen	Oc1ccc(NC(=O)C)cc1	1	1
Dolasetron	O(C(=O)c1c2c([nH]c1)cccc2)C1C[C@@H]2N3[C@H](C1)CC(C2)C(=O)C3	1	1
Fenoprofen	O(c1cc(ccc1)[C@H](C(O)=O)C)c1ccccc1	1	1
Isoproterenol	Oc1cc(ccc1O)[C@H](O)NC(C)C	1	1
Lansoprazole	S(=O)(Cc1nccc(OCC(F)(F)F)c1C)c1[nH]c2c(n1)cccc2	1	1
Molecule-618	O(C)c1cc2c(nccc2[C@H](O)[C@@H]2N3C[C@@H]([C@H](C2)CC3)C=C)cc1	1	0
Oxyfedrine	O(C)c1cc(ccc1)C(=O)CCN[C@H]([C@@H](O)c1ccccc1)C	1	1
Sulfamethizole	s1c(nnc1NS(=O)(=O)c1ccc(N)cc1)C	1	1
Triazolam	Clc1ccccc1C1=NCc2[nH+]nc(n2-c2c1cc(Cl)cc2)C	1	1
Zalcitabine	O1[C@@H](CC[C@@H]1N1C=CC(=NC1=O)N)CO	1	1
delavirdine	S(=O)(=O)(Nc1cc2cc([nH]c2cc1)C(=O)N1CCN(CC1)c1ncccc1NC(C)C)C	1	1
enzalutamide	S=C1N(C(C)(C)C(=O)N1c1cc(C(F)(F)F)c(cc1)C#N)c1cc(F)c(cc1)C(=O)NC	1	1
isoprenaline hydrochloride	Oc1cc(ccc1O)C(O)CNC(C)C	1	1
norfenfluramine	FC(F)(F)c1cc(ccc1)CC(N)C	1	0
procainamide	O=C(NCCN(CC)CC)c1ccc(N)cc1	1	1
quinine	O(C)c1cc2c(nccc2[C@@H](O)[C@H]2N3C[C@@H]([C@H](C2)CC3)C=C)cc1	1	1
rufinamide	Fc1cccc(F)c1Cn1nnc(c1)C(=O)N	1	1
vildagliptin	OC12CC3(NCC(=O)N4CCC[C@H]4C#N)CC(C1)CC(C3)C2	1	1
viomycin	O=C/1N[C@@H]([C@@H]2NC(N[C@@H](O)C2)=N)C(=O)NC[C@H](NC(=O)C[C@@H](N)CCCN)C(=O)N[C@@H](CO)C(=O)N[C@@H](CO)C(=O)N\C\1=C/NC(=O)N	1	1
Lamivudine	S1C[C@@H](O[C@H]1CO)N1C=CC(=NC1=O)N	1	1
Topiramate	S(OC[C@]12OC(O[C@H]1[C@@H]1OC(O[C@@H]1CO2)(C)C)(C)C)(=O)(=O)N	1	1
levodopa	Oc1cc(ccc1O)C[C@H](N)C(O)=O	1	1
sertraline hydrochloride	Clc1cc(ccc1Cl)[C@@H]1CC[C@H](NC)c2c1cccc2	1	1
paricalcitol	O[C@@H]1C\C(\C[C@@H](O)C1)=C\C=C/1\[C@@H]2CC[C@H]([C@@H](\C=C\[C@@H](C(O)(C)C)C)C)[C@]2(CCC\1)C	1	1
Benzydamine	O(CCCN(C)C)c1nn(c2c1cccc2)Cc1ccccc1	1	1
Bupropion	Clc1cc(ccc1)C(=O)[C@H](NC(C)(C)C)C	1	1
Cimetidine	S(Cc1nc[nH]c1C)CCN\C(=N\C#N)\NC	1	1
Clindamycin	Cl[C@@H]([C@H](NC(=O)[C@H]1N(C[C@@H](C1)CCC)C)[C@H]1O[C@H](SC)[C@H](O)[C@@H](O)[C@H]1O)C	1	1
Clobazam	Clc1cc2N(C(=O)CC(=O)N(c2cc1)C)c1ccccc1	1	1
aripiprazole	Clc1c(N2CCN(CC2)CCCCOc2cc3NC(=O)CCc3cc2)cccc1Cl	1	1
azathioprine	S(c1n(cnc1[N+](=O)[O-])C)c1[nH]cnc-2ncnc1-2	1	1
hydromorphone hydrochloride	O1[C@@H]2[C@]34[C@H]([C@H](N(CC3)C)Cc3c4c1c(O)cc3)CCC2=O	1	1
monoxidine	Clc1nc(nc(OC)c1NC=1NCCN=1)C	1	0
emodin	Oc1c2c(cc(c1)C)C(=O)c1c(C2=O)c(O)cc(O)c1	1	0
Acrivastine	OC(=O)\C=C\c1nc(ccc1)/C(=C/CN1CCCC1)/c1ccc(cc1)C	1	1
Disulfiram	S(SC(=S)N(CC)CC)C(=S)N(CC)CC	1	1
Misoprostol	O=C1C[C@H](O)[C@H](\C=C\C[C@@](O)(CCCC)C)[C@H]1CCCCCCC(OC)=O	1	1
Moclobemide	Clc1ccc(cc1)C(=O)NCCN1CCOCC1	1	1
Moxonidine	Clc1nc(nc(OC)c1NC=1NCCN=1)C	1	1
Nitrendipine	O(C(=O)C=1[C@@H](C(C(OC)=O)=C(NC=1C)C)c1cc([N+](=O)[O-])ccc1)CC	1	1
Trovafloxacin	Fc1cc(F)ccc1N1C=C(C(O)=O)C(=O)c2cc(F)c(nc12)N1C[C@@H]2[C@H](C1)C2N	1	1
dexfenfluramine hydrochloride	FC(F)(F)c1cc(ccc1)CC(NCC)C	1	1
Chloramphenicol	ClC(Cl)C(=O)N[C@@H]([C@H](O)c1ccc([N+](=O)[O-])cc1)CO	1	1
Sultopride	S(=O)(=O)(CC)c1cc(C(=O)NC[C@H]2N(CCC2)CC)c(OC)cc1	1	1
Tenidap	Clc1cc\2c(N(C(=O)N)C(=O)/C/2=C(/O)\c2sccc2)cc1	1	1
chloroxine	Clc1cc(Cl)c2c(nccc2)c1O	1	1
enoxacin	Fc1cc2c(nc1N1CCNCC1)N(C=C(C(O)=O)C2=O)CC	1	1
febuxostat	s1c(nc(C)c1C(O)=O)-c1cc(C#N)c(OCC(C)C)cc1	1	1
glycerylnitrate	O([N+](=O)[O-])CC(O)CO	1	0
Almitrine	Fc1ccc(cc1)C(N1CCN(CC1)c1nc(nc(n1)NCC=C)NCC=C)c1ccc(F)cc1	1	1
Alprazolam	Clc1cc2c(-n3c(nnc3C)CN=C2c2ccccc2)cc1	1	1
Amphetamine	N[C@@H](Cc1ccccc1)C	1	1
Azatadine	n1c2c(CCc3c(cccc3)C2=C2CCN(CC2)C)ccc1	1	1
Betaxolol	O(C[C@@H](O)CNC(C)C)c1ccc(cc1)CCOCC1CC1	1	1
Bicalutamide	S(=O)(=O)(c1c(C)c(cc(NC(=O)[C@H](O)C)c1C#N)C(F)(F)F)c1ccc(F)cc1	1	1
Bisoprolol	O(C[C@@H](O)CNC(C)C)c1ccc(cc1)COCCOC(C)C	1	1
Chlorzoxazone	Clc1cc2NC(Oc2cc1)=O	1	1
Dapsone	S(=O)(=O)(c1ccc(N)cc1)c1ccc(N)cc1	1	1
Dexamethasone	F[C@@]12[C@H]([C@@H]3C[C@@H](C)[C@](O)(C(=O)CO)[C@]3(C[C@@H]1O)C)CCC1=CC(=O)C=C[C@@]12C	1	1
Diflunisal	Fc1cc(F)ccc1-c1cc(C(O)=O)c(O)cc1	1	1
Diloxanide	ClC(Cl)C(=O)N(C)c1ccc(O)cc1	1	1
Ethacrynic_acid	Clc1c(Cl)c(OCC(O)=O)ccc1C(=O)C(=O)CC	1	1
Ethionamide	S=C(N)c1cc(ncc1)CC	1	1
Feprazone	O=C1N(N(C(=O)C1CC=C(C)C)c1ccccc1)c1ccccc1	1	0
Flutamide	FC(F)(F)c1cc(NC(=O)C(C)C)ccc1[N+](=O)[O-]	1	1
Fluvoxamine	FC(F)(F)c1ccc(cc1)/C(=N/OCCN)/CCCCOC	1	1
Hydroxychloroquine	Clc1cc2nccc(N[C@@H](CCN(CCO)CC)C)c2cc1	1	1
Hydroxyprogesterone_caproate	O=C1CC[C@@]2([C@@H]3[C@H]([C@@H]4CC[C@](OC(=O)CCCCC)(C(=O)C)[C@]4(CC3)C)C=CC2=C1)C	1	1
Isosorbide_dinitrate	O1[C@H]2[C@H](OC[C@@H]2O[N+](=O)[O-])[C@H](O[N+](=O)[O-])C1	1	1
Ketotifen	s1c2c(cc1)C(c1c(CC2=O)cccc1)=C1CCN(CC1)C	1	1
Levosimendan	O=C1NN=C([C@@H](C1)C)c1ccc(NN=C(C#N)C#N)cc1	1	1
Loratadine	Clc1cc2c(cc1)C(c1ncccc1CC2)=C1CCN(CC1)C(OCC)=O	1	1
Mebeverine	O(C)c1cc(ccc1OC)C(OCCCCN([C@H](Cc1ccc(OC)cc1)C)CC)=O	1	1
Meloxicam	s1c(cnc1NC(=O)C=1N(S(=O)(=O)c2c(cccc2)C=1O)C)C	1	1
Mestranol	O(C)c1cc2CC[C@H]3[C@@H]4CC[C@](O)(C#C)[C@]4(CC[C@@H]3c2cc1)C	1	1
Mifepristone	O=C1CCC2=C3[C@H]([C@@H]4CC[C@@](O)(C#C)[C@]4(C[C@@H]3c3ccc(N(C)C)cc3)C)CCC2=C1	1	1
Morphine	O1[C@@H]2[C@]34[C@H]([C@H](N(CC3)C)Cc3c4c1c(O)cc3)C=C[C@@H]2O	1	1
Moxifloxacin	Fc1cc2c(N(C=C(C(O)=O)C2=O)C2CC2)c(OC)c1N1C[C@H]2[C@H](NCCC2)C1	1	1
Nalidixic_acid	O=C1c2ccc(nc2N(C=C1C(O)=O)CC)C	1	1
Nifedipine	O(C(=O)C)C=1[C@@H](C(C(OC)=O)=C(NC=1C)C)c1ccccc1[N+](=O)[O-]	1	1
Nisoldipine	O(C(=O)C=1[C@H](C(C(OC)=O)=C(NC=1C)C)c1ccccc1[N+](=O)[O-])CC(C)C	1	1
Papaverine	O(C)c1cc(ccc1OC)Cc1nccc2c1cc(OC)c(OC)c2	1	1
Phenazopyridine	n1c(N)c(\N=N\c2ccccc2)ccc1N	1	1
Phenytoin	O=C1NC(=O)NC1(c1ccccc1)c1ccccc1	1	1
Pindolol	O(C[C@H](O)CNC(C)C)c1c2c([nH]cc2)ccc1	1	1
Protionamide	S=C(N)c1cc(ncc1)CCC	1	0
Quinalbarbitone	O=C1NC(=O)NC(=O)C1([C@H](CCC)C)CC=C	1	1
Rabeprazole	S(=O)(Cc1nccc(OCCCOC)c1C)c1[nH]c2c(n1)cccc2	1	1
Riluzole	s1c2cc(OC(F)(F)F)ccc2nc1N	1	1
Rizatriptan	[nH]1cc(c2cc(ccc12)Cn1ncnc1)CCN(C)C	1	1
Sparfloxacin	Fc1c(N2C[C@H](N[C@H](C2)C)C)c(F)c2N(C=C(C(O)=O)C(=O)c2c1N)C1CC1	1	1
Sulfisomidine	S(=O)(=O)(Nc1nc(nc(c1)C)C)c1ccc(N)cc1	1	0
Sulindac	S(=O)(C)c1ccc(cc1)\C=C/1\c2c(cc(F)cc2)C(CC(O)=O)=C\1C	1	1
Telithromycin	O1[C@@H](CC)[C@]2(OC(=O)N([C@H]2[C@@H](C)C(=O)[C@H](C[C@](OC)(C)[C@@H](O[C@@H]2O[C@H](C[C@H](N(C)C)[C@@H]2O)C)[C@@H](C)C(=O)[C@@H](C)C1=O)C)CCCCn1cc(nc1)-c1cccnc1)C	1	1
Thiabendazole	s1cc(nc1)-c1[nH]c2c(n1)cccc2	1	1
Tiagabine	s1ccc(C)c1C(=CCCN1C[C@@H](CCC1)C(O)=O)c1sccc1C	1	1
Tolazoline	N1CCN=C1Cc1ccccc1	1	1
Tolbutamide	S(=O)(=O)(NC(=O)NCCCC)c1ccc(cc1)C	1	1
Triamcinolone_acetonide	F[C@@]12[C@H]([C@@H]3C[C@H]4OC(O[C@@]4(C(=O)CO)[C@]3(C[C@@H]1O)C)(C)C)CCC1=CC(=O)C=C[C@@]12C	1	1
acenocoumarol	O1c2c(cccc2)C(O)=C(C(CC(=O)C)c2ccc([N+](=O)[O-])cc2)C1=O	1	1
acetylcysteine	SCC(NC(=O)C)C(O)=O	1	1
bupivacaine	O=C(Nc1c(cccc1C)C)C1NCCCC1CCCC	1	1
carbenoxolone sodium	O(C(=O)CCC(O)=O)C1CCC2(C3C(CCC2C1(C)C)(C)C1(C(C2CC(CCC2(CC1)C)(C(O)=O)C)=CC3=O)C)C	1	0
cefalexin	S1C2N(C(=O)C2NC(=O)C(N)c2ccccc2)C(C(O)=O)=C(C1)C	1	1
clemastine funurate	Clc1ccc(cc1)[C@@](OCC[C@@H]1N(CCC1)C)(C)c1ccccc1	1	1
diethylcarbamazine	O=C(N(CC)CC)N1CCN(CC1)C	1	1
digitoxin	O1C(C)C(OC2OC(C)C(O)C(O)C2)C(O)CC1OC1C(OC(OC2CC3CCC4C(CCC5(C)C(CCC45O)C4=CC(OC4)=O)C3(CC2)C)CC1O)C	1	1
diphenhydramine hydrochloride	O(C(c1ccccc1)c1ccccc1)CCN(C)C	1	1
diphenoxylate	O(C(=O)C1(CCN(CC1)CCC(C#N)(c1ccccc1)c1ccccc1)c1ccccc1)CC	1	1
doxifluridine	FC1=CN([C@@H]2O[C@H](C)[C@@H](O)[C@H]2O)C(=O)NC1=O	1	0
ertapenem	S([C@H]1C[C@H](NC1)C(=O)Nc1cc(ccc1)C(O)=O)C=1[C@@H]([C@H]2N(C=1C(O)=O)C(=O)[C@@H]2[C@H](O)C)C	1	1
floxuridine	FC1=CN([C@@H]2O[C@H](CO)[C@@H](O)C2)C(=O)NC1=O	1	1
fluocortolone	F[C@@H]1C2=CC(=O)C=C[C@@]2([C@@H]2[C@H]([C@@H]3C[C@@H](C)[C@H](C(=O)CO)[C@]3(C[C@@H]2O)C)C1)C	1	1
ginkgolide_a	O1C2CC34C56C(OC(=O)C5O)OC3(C2(O)C(C)C1=O)C(OC4CC6C(C)(C)C)=O	1	1
indapamide	Clc1ccc(cc1S(=O)(=O)N)C(=O)NN1c2c(CC1C)cccc2	1	1
meprobamate	O(CC(CCC)(COC(=O)N)C)C(=O)N	1	1
nitisinone	FC(F)(F)c1cc([N+](=O)[O-])c(cc1)C(=O)C1C(=O)CCCC1=O	1	1
pregabalin	OC(=O)C[C@H](CC(C)C)CN	1	1
sufentanil	s1cccc1CCN1CCC(N(C(=O)CC)c2ccccc2)(CC1)COC	1	1
terazocin	N1(CC=CC=CC=C1)C=1N(N2CC=CC=CC=C2)CC=CC=CC=1	1	1
Diltiazem	S1c2c(N(CCN(C)C)C(=O)[C@H](OC(=O)C)[C@@H]1c1ccc(OC)cc1)cccc2	1	1
Hydrocortisone	O=C1CC[C@@]2([C@@H]3[C@H]([C@@H]4CC[C@](O)(C(=O)CO)[C@]4(C[C@H]3O)C)CCC2=C1)C	1	1
Naloxone	O1[C@@H]2[C@]34CCN([C@H](Cc5c3c1c(O)cc5)[C@]4(O)CCC2=O)CC=C	1	1
Saccharin	S1(=O)(=O)NC(=O)c2c1cccc2	1	0
Terazosin	O1CCC[C@H]1C(=O)N1CCN(CC1)c1nc(N)c2cc(OC)c(OC)cc2n1	1	1
clorazepate	Clc1cc2c(NC(=O)C(N=C2c2ccccc2)C(O)=O)cc1	1	1
niacin	OC(=O)c1cccnc1	1	1
phenylethylmalonamide	O=C(N)C(CC)(C(=O)N)c1ccccc1	1	0
amoxicillin	S1C2N(C(C(O)=O)C1(C)C)C(=O)C2NC(=O)C(N)c1ccc(O)cc1	1	1
Isradipine	o1[nH][c+]2-[c+]([nH]1)cccc2[C@@H]1C(C(OC(C)C)=O)=C(NC(C)=C1C(OC)=O)C	1	1
boceprevir	O=C(NC(CC1CCC1)C(=O)C(=O)N)[C@H]1N(C[C@H]2[C@@H]1C2(C)C)C(=O)[C@@H](NC(=O)NC(C)(C)C)C(C)(C)C	1	1
lorcaserin_hydrochloride	Cl.Clc1cc2c(CCNC[C@@H]2C)cc1	1	1
suprofen	s1cccc1C(=O)c1ccc(cc1)C(C(O)=O)C	1	1
varenicline tartrate	n1c2c(ncc1)cc1[C@@H]3C[C@H](c1c2)CNC3	1	1
chrysophanol	Oc1c2c(cc(c1)C)C(=O)c1c(C2=O)c(O)ccc1	1	0
physcion	O(C)c1cc(O)c2c(c1)C(=O)c1c(C2=O)c(O)cc(c1)C	1	0
Alprenolol	O(C[C@@H](O)CNC(C)C)c1ccccc1CC=C	1	1
Amrinone	O=C1NC=C(C=C1N)c1ccncc1	1	1
Codeine	O1[C@@H]2[C@]34[C@H]([C@H](N(CC3)C)Cc3c4c1c(OC)cc3)C=C[C@@H]2O	1	1
chlorpropamide	Clc1ccc(S(=O)(=O)NC(=O)NCCC)cc1	1	1
emtricitabine	S1C[C@H](O[C@H]1CO)N1C=C(F)C(=NC1=O)N	1	1
epristeride	OC(=O)C=1CCC2(C3C(C4CCC(C(=O)NC(C)(C)C)C4(CC3)C)CC=C2C=1)C	1	1
mazindol	Clc1ccc(cc1)C1(O)N2C(=NCC2)c2c1cccc2	1	1
pipemidic_acid	O=C1c2c(nc(nc2)N2CCNCC2)N(C=C1C(O)=O)CC	1	0
rofecoxib	S(=O)(=O)(C)c1ccc(cc1)C=1COC(=O)C=1c1ccccc1	1	1
pirazolac	Clc1ccc(cc1)-c1cn(nc1CC(O)=O)-c1ccc(F)cc1	1	0
Clozapine	Clc1cc2N=C(N3CCN(CC3)C)c3c(Nc2cc1)cccc3	1	1
Dienogest	O=C1CCC=2C(=C1)CC[C@H]1[C@@H]3CC[C@](O)(CC#N)[C@@]3(CCC1=2)C	1	1
Felodipine	Clc1c(cccc1Cl)[C@@H]1C(C(OCC)=O)=C(NC(C)=C1C(OC)=O)C	1	1
Fluconazole	Fc1cc(F)ccc1C(O)(Cn1ncnc1)Cn1ncnc1	1	1
Acitretin	O(C)c1cc(C)c(\C=C\C(=C\C=C\C(=C/C(O)=O)\C)\C)c(C)c1C	1	1
Amitriptyline	N(CCC=C1c2c(CCc3c1cccc3)cccc2)(C)C	1	1
Amobarbital	O=C1[N-]C(=O)[N-]C(=O)C1(CCC(C)C)CC	1	1
Amoxapine	Clc1cc2c(Oc3c(N=C2N2CCNCC2)cccc3)cc1	1	1
Baclofen	Clc1ccc(cc1)[C@H](N)CCC(O)=O	1	1
Bifemelane	O(CCCCNC)c1ccccc1Cc1ccccc1	1	0
Carteolol	O(C[C@@H](O)CNC(C)(C)C)c1c2CCC(=O)Nc2ccc1	1	1
Cephradine	S1[C@H]2N(C(C(O)=O)=C(C1)C)C(=O)[C@H]2NC(=O)[C@H](N)C=1CC=CCC=1	1	1
Cinoxacin	O1c2c(OC1)cc1N(N=C(C(O)=O)C(=O)c1c2)CC	1	1
Clomethiazole	ClCCc1scnc1C	1	0
Clomipramine	Clc1cc2N(c3c(CCc2cc1)cccc3)CCCN(C)C	1	1
Clonidine	Clc1cccc(Cl)c1N=C1NCCN1	1	1
Diethylpropion	O=C([C@@H](N(CC)CC)C)c1ccccc1	1	1
Disopyramide	O=C(N)C(CCN(C(C)C)C(C)C)(c1ccccc1)c1ncccc1	1	1
Domperidone	Clc1cc2NC(=O)N(NC3CCN(CC3)CCCN3c4c(NC3=O)cccc4)c2cc1	1	1
Fenfluramine	FC(F)(F)c1cc(ccc1)[C@H](CNCC)C	1	1
Fludrocortisone_acetate	F[C@@]12[C@H]([C@@H]3CC[C@](O)(C(=O)COC(=O)C)[C@@]3(C[C@H]1O)C)CCC1=CC(=O)CC[C@]12C	1	1
Flumazenil	Fc1cc2c(-n3c(CN(C)C2=O)c(nc3)C(OCC)=O)cc1	1	1
Flurbiprofen	Fc1cc(ccc1-c1ccccc1)[C@H](C(O)=O)C	1	1
Galantamine	O1[C@@H]2[C@@]3(CCN(Cc4c3c1c(OC)cc4)C)C=C[C@H](O)C2	1	1
Gliquidone	S(=O)(=O)(NC(=O)NC1CCCCC1)c1ccc(cc1)CCN1C(=O)C(c2c(cc(OC)cc2)C1=O)(C)C	1	1
Glymidine	S(=O)(=O)(Nc1ncc(OCCOC)cn1)c1ccccc1	1	1
Hexobarbital	O=C1N(C)C(=O)NC(=O)[C@@]1(C)C=1CCCCC=1	1	1
Ketorolac	OC(=O)[C@H]1CCn2c1ccc2C(=O)c1ccccc1	1	1
Labetalol	Oc1ccc(cc1C(=O)N)[C@H](O)CN[C@@H](CCc1ccccc1)C	1	1
Levamisole	S1CCN2C[C@H](N=C12)c1ccccc1	1	1
Lorazepam	Clc1ccccc1C1=N[C@H](O)C(=O)Nc2c1cc(Cl)cc2	1	1
Methimazole	S=C1NC=CN1C	1	1
Metronidazole	OCCn1c(ncc1[N+](=O)[O-])C	1	1
Naltrexone	O1[C@@H]2[C@@]34CCN([C@@H](Cc5c3c1c(O)cc5)[C@]4(O)CCC2=O)CC1CC1	1	1
Nicardipine	O(C(=O)c1c(C2C=C(NC(=C2)C)C)c(C(OC)=O)c(cc1[N+](=O)[O-])C)CCN(Cc1ccccc1)C	1	1
Nitrazepam	O=C1Nc2c(cc([N+](=O)[O-])cc2)C(=NC1)c1ccccc1	1	1
Nitrofurantoin	o1c(ccc1[N+](=O)[O-])\C=N\N1CC(=O)NC1=O	1	1
Oxprenolol	O(CC=C)c1ccccc1OC[C@H](O)CNC(C)C	1	1
Pentoxifylline	O=C1N(CCCCC(=O)C)C(=O)N(c2ncn(c12)C)C	1	1
Phenprocoumon	O1c2c(cccc2)C(O)=C([C@H](CC)c2ccccc2)C1=O	1	1
Phenylpropanolamine	O[C@H]([C@H](N)C)c1ccccc1	1	1
Practolol	O(C[C@@H](O)CNC(C)C)c1ccc(NC(=O)C)cc1	1	1
Promethazine	S1c2c(N(c3c1cccc3)C[C@H](N(C)C)C)cccc2	1	1
Propranolol	O(C[C@@H](O)CNC(C)C)c1c2c(ccc1)cccc2	1	1
Protriptyline	N(CCCC1c2c(C=Cc3c1cccc3)cccc2)C	1	1
Ritodrine	Oc1ccc(cc1)CCN[C@H]([C@@H](O)c1ccc(O)cc1)C	1	1
Sotalol	S(=O)(=O)(Nc1ccc(cc1)[C@@H](O)CNC(C)C)C	1	1
Sulfamethazine	S(=O)(=O)(Nc1nc(cc(n1)C)C)c1ccc(N)cc1	1	1
Sulfisoxazole	S(=O)(=O)(Nc1onc(C)c1C)c1ccc(N)cc1	1	1
Temazepam	Clc1cc2c(N(C)C(=O)[C@@H](O)N=C2c2ccccc2)cc1	1	1
Timolol	s1nc(N2CCOCC2)c(OC[C@H](O)CNC(C)(C)C)n1	1	1
Tramadol	O(C)c1cc(ccc1)[C@@]1(O)CCCC[C@@H]1CN(C)C	1	1
Tropisetron	O(C(=O)c1c2c([nH]c1)cccc2)C1C[C@@H]2N([C@H](C1)CC2)C	1	1
Venlafaxine	O(C)c1ccc(cc1)[C@H](CN(C)C)C1([O-])CCCCC1	1	1
amfebutamone hydrochloride	Clc1cc(ccc1)C(=O)C(NC(C)(C)C)C	1	1
amlodipine	Clc1ccccc1C1C(C(OCC)=O)=C(NC(C)=C1C(OC)=O)COCCN	1	1
cefprozil	S1[C@H]2N(C(C(O)=O)=C(C1)\C=C\C)C(=O)[C@H]2NC(=O)[C@H](N)c1ccc(O)cc1	1	1
cinolazepam	Clc1cc2c(N(CCC#N)C(=O)C(O)N=C2c2ccccc2F)cc1	1	1
cloral betaine	O=C([O-])C[N+](C)(C)C	0	0
cortisone-acetate	OC1(CCC2C3C(C4(C(=CC(=O)CC4)CC3)C)C(=O)CC12C)C(=O)COC(=O)C	1	1
diprophylline	O=C1N(C)C(=O)N(c2ncn(c12)CC(O)CO)C	1	1
dosulepin hydrochloride	S1Cc2c(cccc2)C(c2c1cccc2)=CCCN(C)C	1	1
encainide	O(C)c1ccc(cc1)C(=O)Nc1ccccc1CCC1N(CCCC1)C	1	1
gitoxin	O1CC(=CC1=O)[C@@H]1[C@]2(CC[C@H]3[C@@H](CC[C@@H]4C[C@@H](O[C@@H]5O[C@H](C)[C@@H](O[C@@H]6O[C@H](C)[C@@H](O[C@@H]7O[C@H](C)[C@@H](O)[C@@H](O)C7)[C@@H](O)C6)[C@@H](O)C5)CC[C@]34C)[C@@]2(O)C[C@@H]1O)C	1	1
glibenclamide	Clc1cc(C(=O)NCCc2ccc(S(=O)(=O)NC(=O)NC3CCCCC3)cc2)c(OC)cc1	1	1
idazoxan	O1c2c(OCC1C=1NCCN=1)cccc2	1	0
liothyronine	Ic1cc(cc(I)c1Oc1cc(I)c(O)cc1)CC(N)C(O)=O	1	1
phencyclidine	N1(CCCCC1)C1(CCCCC1)c1ccccc1	1	1
pirmenol	OC(CCCN1C(CCCC1C)C)(c1ccccc1)c1ncccc1	1	0
ruxolitinib	[nH]1c2ncnc(c2cc1)-c1cn(nc1)[C@H](CC#N)C1CCCC1	1	1
Bumetanide	S(=O)(=O)(N)c1cc(cc(NCCCC)c1Oc1ccccc1)C(O)=O	1	1
Capecitabine	FC1=CN([C@@H]2O[C@H](C)[C@@H](O)[C@H]2O)C(=O)N=C1NC(OCCCCC)=O	1	1
Clofibrate	Clc1ccc(OC(C(OCC)=O)(C)C)cc1	1	1
Gatifloxacin	Fc1cc2c(N(C=C(C(O)=O)C2=O)C2CC2)c(OC)c1N1C[C@H](NCC1)C	1	1
Metoprolol	O(C[C@@H](O)CNC(C)C)c1ccc(cc1)CCOC	1	1
Minoxidil	[O-][n+]1c(N)cc(nc1N)N1CCCCC1	1	1
Praziquantel	O=C1N2[C@H](c3c(CC2)cccc3)CN(C1)C(=O)C1CCCCC1	1	1
Progesterone	O=C1CC[C@@]2([C@@H]3[C@H]([C@@H]4CC[C@H](C(=O)C)[C@]4(CC3)C)CCC2=C1)C	1	1
Torsemide	S(=O)(=O)(NC(=O)NC(C)C)c1cnccc1Nc1cc(ccc1)C	1	1
Trapidil	n12ncnc1N=C(C=C2N(CC)CC)C	1	1
ethosuximide	O=C1NC(=O)CC1(CC)C	1	1
posaconazole	Fc1cc(F)ccc1C1(OCC(C1)COc1ccc(N2CCN(CC2)c2ccc(N3C=NN(C(C(O)C)CC)C3=O)cc2)cc1)Cn1ncnc1	1	1
torasemide	S(=O)(=O)(NC(=O)NC(C)C)c1cnccc1Nc1cc(ccc1)C	1	1
voriconazole	Fc1cc(F)ccc1[C@](O)([C@@H](C)c1ncncc1F)Cn1ncnc1	1	1
mycophenolate_mofetil	O1Cc2c(c(O)c(C\C=C(\CCC(OCCN3CCOCC3)=O)/C)c(OC)c2C)C1=O	1	1
Gallopamil	O(C)c1c(OC)cc(cc1OC)[C@@](C(C)C)(CCCN(CCc1cc(OC)c(OC)cc1)C)C#N	1	0
Gliclazide	S(=O)(=O)(NC(=O)NN1C[C@@H]2[C@H](CCC2)C1)c1ccc(cc1)C	1	1
Risperidone	Fc1cc2onc(c2cc1)C1CCN(CC1)CCC=1C(=O)N2C(=NC=1C)CCCC2	1	1
Trimethoprim	O(C)c1c(OC)cc(cc1OC)Cc1cnc(nc1N)N	1	1
celecoxib	S(=O)(=O)(N)c1ccc(-n2nc(cc2-c2ccc(cc2)C)C(F)(F)F)cc1	1	1
oxandrolone	O1C[C@]2([C@H](CC1=O)CC[C@H]1[C@@H]3CC[C@@](O)(C)[C@]3(CC[C@@H]12)C)C	1	1
treosulfan	S(OCC(O)C(O)COS(=O)(=O)C)(=O)(=O)C	1	0
verapamil	O(C)c1cc(ccc1OC)C(C(C)C)(CCCN(CCc1cc(OC)c(OC)cc1)C)C#N	1	1
warfarin	O1c2c(cccc2)C(O)=C(C(CC(=O)C)c2ccccc2)C1=O	1	1
Antipyrine	O=C1N(N(C)C(=C1)C)c1ccccc1	1	1
Chlorpromazine	Clc1cc2N(c3c(Sc2cc1)cccc3)CCCN(C)C	1	1
Cisapride	Clc1cc(C(=O)N[C@@H]2CCN(C[C@@H]2OC)CCCOc2ccc(F)cc2)c(OC)cc1N	1	1
Delmopinol	O1C[C@@H](N(CC1)CCO)CCCC(CCC)CCC	1	0
Desipramine	N(CCCN1c2c(CCc3c1cccc3)cccc2)C	1	1
Glibornuride	S(=O)(=O)(NC(=O)N[C@@H]1[C@@H]2CC[C@](C)([C@@H]1O)C2(C)C)c1ccc(cc1)C	1	1
Glyburide	Clc1cc(C(=O)NCCc2ccc(S(=O)(=O)NC(=O)NC3CCCCC3)cc2)c(OC)cc1	1	1
Ibuprofen	OC(=O)[C@H](C)c1ccc(cc1)CC(C)C	1	1
Imatinib	O=C(Nc1cc(Nc2nc(ccn2)-c2cccnc2)c(cc1)C)c1ccc(cc1)CN1CCNCC1	1	1
Imipramine	N(CCCN1c2c(CCc3c1cccc3)cccc2)(C)C	1	1
Isoxepac	O1Cc2c(cccc2)C(=O)c2cc(ccc12)CC(O)=O	1	0
Lacidipine	O(C(=O)C=1C(C(C(OCC)=O)=C(NC=1C)C)c1ccccc1\C=C\C(OC(C)(C)C)=O)CC	1	1
Lamotrigine	Clc1c(cccc1Cl)-c1nnc(nc1N)N	1	1
Lidocaine	O=C(Nc1c(cccc1C)C)CN(CC)CC	1	1
Maprotiline	N(CCCC12CCC(c3c1cccc3)c1c2cccc1)C	1	1
Mexiletine	O(C[C@H](N)C)c1c(cccc1C)C	1	1
Nefopam	O1CCN(Cc2c(cccc2)[C@@H]1c1ccccc1)C	1	0
Oxaprozin	o1c(c(nc1CCC(O)=O)-c1ccccc1)-c1ccccc1	1	1
Pelrinone	O=C1NC(=NC(NCc2cccnc2)=C1C#N)C	1	0
Phenylbutazone	O=C1N(N(C(=O)C1CCCC)c1ccccc1)c1ccccc1	1	1
Ropinirole	O=C1Nc2c(C1)c(ccc2)CCN(CCC)CCC	1	1
Tolmesoxide	S(=O)(C)c1cc(OC)c(OC)cc1C	1	0
Valproic_acid	OC(=O)C(CCC)CCC	1	1
Ximoprofen	OC(=O)[C@@H](C)c1ccc(cc1)[C@@H]1C\C(=N/O)\CCC1	1	0
Zopiclone	Clc1ccc(nc1)N1[C@H](OC(=O)N2CCN(CC2)C)c2nccnc2C1=O	1	1
Caffeine	O=C1N(C)C(=O)N(c2ncn(c12)C)C	1	1
Desmethyldiazepam	Clc1cc2c(NC(=O)CN=C2c2ccccc2)cc1	1	0
Diazepam	Clc1cc2c(N(C)C(=O)CN=C2c2ccccc2)cc1	1	1
Fluorescein	O1C2(c3c(cccc3)C1=O)c1c(Oc3c2ccc(O)c3)cc(O)cc1	1	1
Lomefloxacin	Fc1c2N(C=C(C(O)=O)C(=O)c2cc(F)c1N1C[C@@H](NCC1)C)CC	1	1
Miconazole	Clc1cc(Cl)ccc1CO[C@H](Cn1ccnc1)c1ccc(Cl)cc1Cl	1	1
Naproxen	O(C)c1cc2c(cc(cc2)[C@@H](C(O)=O)C)cc1	1	1
Pheniramine	n1ccccc1[C@H](CCN(C)C)c1ccccc1	1	1
Tianeptine	Clc1cc2S(=O)(=O)N(c3c(N(c2cc1)CCCCCCC(O)=O)cccc3)C	1	1
carfecillin	S1[C@H]2N([C@@H](C(O)=O)C1(C)C)C(=O)[C@H]2NC(=O)C(C(Oc1ccccc1)=O)c1ccccc1	1	1
Acetanilide	O=C(Nc1ccccc1)C	1	1
Acetazolamide	s1c(nnc1S(=O)(=O)N)NC(=O)C	1	1
Alfacalcidol	O[C@H]1C[C@H](O)C\C(=C/C=C\2/[C@@H]3CC[C@H]([C@@H](CCCC(C)C)C)[C@]3(CCC/2)C)\C1=C	1	1
Aminoglutethimide	O=C1NC(=O)CC[C@]1(CC)c1ccc(N)cc1	1	1
Aminopyrine	O=C1N(N(C)C(C)=C1N(C)C)c1ccccc1	1	1
Anastrozole	n1cn(nc1)Cc1cc(cc(c1)C(C#N)(C)C)C(C#N)(C)C	1	1
Astemizole	Fc1ccc(cc1)Cn1c2c(nc1NC1CCN(CC1)CCc1ccc(OC)cc1)cccc2	1	1
Azelastine	Clc1ccc(cc1)C[C@H]1NN([C@@H]2CCCN(CC2)C)C(=O)c2c1cccc2	1	1
Azimilide	Clc1ccc(cc1)-c1oc(cc1)\C=N\N1CC(=O)N(CCCCN2CCN(CC2)C)C1=O	1	1
Bendroflumethiazide	S(=O)(=O)(N)c1cc2S(=O)(=O)N[C@@H](Nc2cc1C(F)(F)F)Cc1ccccc1	1	1
Benorylate	O(C(=O)C)c1ccccc1C(Oc1ccc(NC(=O)C)cc1)=O	1	1
Bepridil	O(CC(C)C)C[C@@H](N(Cc1ccccc1)c1ccccc1)CN1CCCC1	1	1
Betahistine	n1ccccc1CCNC	1	1
Bezafibrate	Clc1ccc(cc1)C(=O)NCCc1ccc(OC(C(O)=O)(C)C)cc1	1	1
Biperiden	O[C@](CCN1CCCCC1)([C@H]1[C@@H]2C=C[C@H](C1)C2)c1ccccc1	1	1
Budesonide	O1[C@]2([C@@H](O[C@@H]1CCC)C[C@H]1[C@H]3[C@@H]([C@@]4(C(=CC(=O)C=C4)CC3)C)[C@H](O)C[C@@]12C)C(=O)CO	1	1
Buspirone	O=C1N(CCCCN2CCN(CC2)c2ncccn2)C(=O)CC2(C1)CCCC2	1	1
Camazepam	Clc1cc2c(N(C)C(=O)[C@@H](OC(=O)N(C)C)N=C2c2ccccc2)cc1	1	1
Carmustine	ClCCN(N=O)C(=O)NCCCl	1	1
Chloral_hydrate	ClC(Cl)(Cl)C(O)O	1	1
Chlorambucil	ClCCN(CCCl)c1ccc(cc1)CCCC(O)=O	1	1
Chloroquine	Clc1cc2nccc(N[C@H](CCCN(CC)CC)C)c2cc1	1	1
Chlorphenesin	Clc1ccc(OC[C@@H](O)CO)cc1	1	1
Cilomilast	O(c1cc(ccc1OC)C1(CCC(CC1)C(O)=O)C#N)C1CCCC1	1	1
Cinchonine	O[C@H]([C@@H]1N2C[C@@H]([C@H](C1)CC2)C=C)c1c2c(ncc1)cccc2	1	0
Citalopram	Fc1ccc(cc1)[C@@]1(OCc2cc(ccc12)C#N)CCCN(C)C	1	1
Corticosterone	O=C1CC[C@@]2([C@@H]3[C@H]([C@@H]4CC[C@H](C(=O)CO)[C@]4(C[C@H]3O)C)CCC2=C1)C	1	0
Cyclopenthiazide	Clc1cc2N[C@H](NS(=O)(=O)c2cc1S(=O)(=O)N)CC1CCCC1	1	0
Diacetylmorphine	O1[C@@H]2[C@]34[C@H]([C@H](N(CCC3)C)Cc3c4c1c(OC(=O)C)cc3)C=C[C@@H]2OC(=O)C	1	1
Dicyclomine	O(C(=O)C1(CCCCC1)C1CCCCC1)CCN(CC)CC	1	1
Dofetilide	S(=O)(=O)(Nc1ccc(cc1)CCN(CCOc1ccc(NS(=O)(=O)C)cc1)C)C	1	1
Doxazosin	O1c2c(OC[C@H]1C(=O)N1CCN(CC1)c1nc(N)c3cc(OC)c(OC)cc3n1)cccc2	1	1
Doxepin	O1Cc2c(cccc2)\C(\c2c1cccc2)=C\CCN(C)C	1	1
Ethyl_alcohol	OCC	1	1
Ethynodiol_diacetate	O(C(=O)C)[C@]1(CC[C@H]2[C@H]3[C@@H]([C@@H]4C(=C[C@@H](OC(=O)C)CC4)CC3)CC[C@]12C)C#C	1	1
Etoricoxib	Clc1cc(c(nc1)-c1ccc(nc1)C)-c1ccc(S(=O)(=O)C)cc1	1	1
Finasteride	O=C1N[C@@H]2CC[C@H]3[C@@H]4CC[C@H](C(=O)NC(C)(C)C)[C@]4(CC[C@@H]3[C@]2(C=C1)C)C	1	1
Flucytosine	Fc1cnc(O)nc1N	1	1
Flurazepam	Clc1cc2c(N(CCN(CC)CC)C(=O)CN=C2c2ccccc2F)cc1	1	1
Fluvastatin	Fc1ccc(cc1)-c1c2c(n(C(C)C)c1\C=C\[C@@H](O)C[C@@H](O)CC(O)=O)cccc2	1	1
Gemfibrozil	O(CCCC(C(O)=O)(C)C)c1cc(ccc1C)C	1	1
Genaconazole	S(=O)(=O)([C@@H]([C@@](O)(Cn1ncnc1)c1ccc(F)cc1F)C)C	1	0
Gestodene	O=C1CC[C@@H]2[C@H]3[C@H]([C@@H]4C=C[C@](O)(C#C)[C@@]4(CC3)CC)CCC2=C1	1	1
Glimepiride	S(=O)(=O)(NC(=O)NC1CCC(CC1)C)c1ccc(cc1)CCNC(=O)N1CC(C)=C(CC)C1=O	1	1
Glycine	OC(=O)CN	1	1
Granisetron	O=C(NC1C[C@@H]2N([C@H](C1)CCC2)C)c1nn(c2c1cccc2)C	1	1
Guanfacine	Clc1cccc(Cl)c1CC(=O)NC(N)=N	1	1
Haloperidol	Clc1ccc(cc1)C1(O)CCN(CC1)CCCC(=O)c1ccc(F)cc1	1	1
Hydralazine	n1ncc2c(cccc2)c1NN	1	1
Indobufen	O=C1N(Cc2c1cccc2)c1ccc(cc1)[C@@H](CC)C(O)=O	1	1
Indomethacin	Clc1ccc(cc1)C(=O)n1c2c(cc(OC)cc2)c(CC(O)=O)c1C	1	1
Indoprofen	O=C1N(Cc2c1cccc2)c1ccc(cc1)[C@@H](C(O)=O)C	1	1
Irbesartan	O=C1N(Cc2ccc(cc2)-c2ccccc2-c2nn[nH]n2)C(=NC12CCCC2)CCCC	1	1
Isosorbide-2-mononitrate	O1[C@H]2[C@H](OC[C@@H]2O)[C@@H](O[N+](=O)[O-])C1	1	1
Isoxicam	S1(=O)(=O)N(C)C(C(=O)Nc2noc(c2)C)=C(O)c2c1cccc2	1	1
Ketanserin	Fc1ccc(cc1)C(=O)C1CCN(CC1)CCN1C(=O)c2c(NC1=O)cccc2	1	0
Ketazolam	Clc1cc2c(N(C)C(=O)CN3[C@@]2(OC(=CC3=O)C)c2ccccc2)cc1	1	1
Levetiracetam	O=C1N(CCC1)[C@H](CC)C(=O)N	1	1
Levonorgestrel	O=C1CC[C@@H]2[C@@H]3[C@H]([C@@H]4CC[C@@](O)(C#C)[C@]4(CC3)CC)CCC2=C1	1	1
Linezolid	Fc1cc(N2C[C@@H](OC2=O)CNC(=O)C)ccc1N1CCOCC1	1	1
Lisuride	O=C(N[C@H]1C=C2[C@H](N(C1)C)Cc1c3c2cccc3[nH]c1)N(CC)CC	1	1
Lynestrenol	O[C@]1(CC[C@H]2[C@H]3[C@@H]([C@@H]4C(CC3)=CCCC4)CC[C@]12C)C#C	1	1
Mebendazole	O(C(=O)Nc1[nH]c2cc(ccc2n1)C(=O)c1ccccc1)C	1	1
Meclofenamic_acid	Clc1c(Nc2ccccc2C(O)=O)c(Cl)ccc1C	1	1
Meptazinol	Oc1cc(ccc1)[C@]1(CCCCN(C1)C)CC	1	1
Methocarbamol	O(C[C@@H](O)COC(=O)N)c1ccccc1OC	1	1
Methsuximide	O=C1N(C)C(=O)C[C@@]1(C)c1ccccc1	1	1
Methylergonovine	OC[C@@H](NC(=O)[C@@H]1C=C2[C@H](N(C1)C)Cc1c3c2cccc3[nH]c1)CC	1	1
Methysergide	OC[C@@H](NC(=O)[C@@H]1C=C2[C@H](N(C1)C)Cc1c3c2cccc3n(c1)C)CC	1	1
Nafronyl	O1CCC[C@@H]1C[C@@H](Cc1cc2c(cc1)cccc2)C(OCCN(CC)CC)=O	1	0
Nalbuphine	O1[C@H]2[C@@]34CCN([C@@H](Cc5c3c1c(O)cc5)[C@]4(O)CC[C@@H]2O)CC1CCC1	1	1
Nefazodone	Clc1cc(N2CCN(CC2)CCCN2N=C(N(CCOc3ccccc3)C2=O)CC)ccc1	1	1
Nicotine	n1cc(ccc1)[C@@H]1N(CCC1)C	1	1
Nilutamide	FC(F)(F)c1cc(N2C(=O)C(NC2=O)(C)C)ccc1[N+](=O)[O-]	1	1
Nilvadipine	O(C(=O)C=1[C@H](C(C(OC)=O)=C(NC=1C)C#N)c1cc([N+](=O)[O-])ccc1)C(C)C	1	1
Nitroxoline	Oc1c2ncccc2c([N+](=O)[O-])cc1	1	1
Norethindrone	O=C1CC[C@@H]2[C@@H]3[C@H]([C@@H]4CC[C@@](O)(C#C)[C@]4(CC3)C)CCC2=C1	1	1
Norgestimate	O(C(=O)C)[C@]1(CC[C@H]2[C@H]3[C@@H]([C@@H]4C(=C/C(=N/O)/CC4)CC3)CC[C@]12CC)C#C	1	1
Norgestrel	O=C1CC[C@@H]2[C@@H]3[C@H]([C@H]4CC[C@@](O)(C#C)[C@]4(C=C3)CC)CCC2=C1	1	1
Nortriptyline	N(CCC=C1c2c(CCc3c1cccc3)cccc2)C	1	1
Ofloxacin	Fc1cc2c3N(C=C(C(O)=O)C2=O)[C@@H](COc3c1N1CCN(CC1)C)C	1	1
Ondansetron	O=C1c2c(n(c3c2cccc3)C)CC[C@H]1Cn1ccnc1C	1	1
Orphenadrine	O([C@H](c1ccccc1C)c1ccccc1)CCN(C)C	1	1
Oxatomide	O=C1Nc2c(N1CCCN1CCN(CC1)C(c1ccccc1)c1ccccc1)cccc2	1	0
Oxcarbazepine	O=C1Cc2c(N(c3c1cccc3)C(=O)N)cccc2	1	1
Oxybutynin	O(CC#CCN(CC)CC)C(=O)[C@](O)(C1CCCCC1)c1ccccc1	1	1
Oxyphenbutazone	Oc1ccc(N2N(C(=O)[C@H](CCCC)C2=O)c2ccccc2)cc1	1	1
Paroxetine	Fc1ccc(cc1)[C@@H]1CCNC[C@H]1COc1cc2OCOc2cc1	1	1
Pentobarbital	O=C1NC(=O)NC(=O)C1([C@@H](CCC)C)CC	1	1
Perphenazine	Clc1cc2N(c3c(Sc2cc1)cccc3)CCCN1CCN(CC1)CCO	1	1
Phenglutarimide	O=C1NC(=O)CC[C@@]1(CCN(CC)CC)c1ccccc1	1	0
Phenobarbital	O=C1NC(=O)NC(=O)C1(CC)c1ccccc1	1	1
Piroxicam	S1(=O)(=O)N(C)C(C(=O)Nc2ncccc2)=C(O)c2c1cccc2	1	1
Polythiazide	Clc1cc2N[C@H](N(S(=O)(=O)c2cc1S(=O)(=O)N)C)CSCC(F)(F)F	1	1
Probenecid	S(=O)(=O)(N(CCC)CCC)c1ccc(cc1)C(O)=O	1	1
Procyclidine	O[C@@](CCN1CCCC1)(C1CCCCC1)c1ccccc1	1	1
Propofol	Oc1c(cccc1C(C)C)C(C)C	1	1
Proxyphylline	O=C1N(C)C(=O)N(c2ncn(c12)C[C@@H](O)C)C	1	0
Pseudoephedrine	O[C@H]([C@@H](NC)C)c1ccccc1	1	1
Pyrazinamide	O=C(N)c1nccnc1	1	1
Quinagolide	S(=O)(=O)(N[C@@H]1C[C@H]2[C@@H](N(C1)CCC)Cc1c(C2)c(O)ccc1)N(CC)CC	1	1
Remoxipride	Brc1ccc(OC)c(C(=O)NC[C@H]2N(CCC2)CC)c1OC	1	1
Repaglinide	O(CC)c1cc(ccc1C(O)=O)CC(=O)N[C@@H](CC(C)C)c1ccccc1N1CCCCC1	1	1
Salsalate	O(C(=O)c1ccccc1O)c1ccccc1C(O)=O	1	1
Stavudine	O1[C@@H](C=C[C@@H]1N1C=C(C)C(=O)NC1=O)CO	1	1
Sudoxicam	s1ccnc1NC(=O)C=1N(S(=O)(=O)c2c(cccc2)C=1O)C	1	0
Sulfamethoxazole	S(=O)(=O)(Nc1noc(c1)C)c1ccc(N)cc1	1	1
Sulfinpyrazone	S(=O)(CCC1C(=O)N(N(C1=O)c1ccccc1)c1ccccc1)c1ccccc1	1	1
Tamoxifen	O(CCN(C)C)c1ccc(cc1)\C(=C(\CC)/c1ccccc1)\c1ccccc1	1	1
Tamsulosin	S(=O)(=O)(N)c1cc(ccc1OC)C[C@H](NCCOc1ccccc1OCC)C	1	1
Tenoxicam	s1c2c(S(=O)(=O)N(C)C(C(=O)Nc3ncccc3)=C2O)cc1	1	1
Tesaglitazar	S(Oc1ccc(cc1)CCOc1ccc(cc1)C[C@H](OCC)C(O)=O)(=O)(=O)C	1	0
Testosterone	O=C1CC[C@@]2([C@@H]3[C@H]([C@@H]4CC[C@H](O)[C@]4(CC3)C)CCC2=C1)C	1	1
Tetrabenazine	O(C)c1cc2CCN3[C@@H](CC(=O)[C@H](C3)CC(C)C)c2cc1OC	1	1
Tilidine	O=C(CCC)[C@]1(CCC=C[C@@H]1N(C)C)c1ccccc1	1	1
Tinidazole	S(=O)(=O)(CCn1c(ncc1[N+](=O)[O-])C)CC	1	1
Tocainide	O=C(N(CC)CC)c1cccnc1	1	1
Toremifene	ClCC\C(=C(\c1ccc(OCCN(C)C)cc1)/c1ccccc1)\c1ccccc1	1	1
Trazodone	Clc1cc(N2CCN(CC2)CCC[N+]2=Nc3[n+](cccc3)C2=O)ccc1	1	1
Triamcinolone	F[C@@]12[C@H]([C@@H]3C[C@@H](O)[C@](O)(C(=O)CO)[C@]3(C[C@@H]1O)C)CCC1=CC(=O)C=C[C@@]12C	1	1
Trifluoperazine	S1c2c(N(c3c1cccc3)CCCN1CCN(CC1)C)cc(cc2)C(F)(F)F	1	1
Trihexyphenidyl	O[C@@](CCN1CCCCC1)(C1CCCCC1)c1ccccc1	1	1
Trofosfamide	ClCCN1P(OCCC1)(=O)N(CCCl)CCCl	1	0
Zaleplon	O=C(N(CC)c1cc(ccc1)C=1n2ncc(c2N=CC=1)C#N)C	1	1
Zileuton	s1c2c(cc1[C@@H](N(O)C(=O)N)C)cccc2	1	1
Zomepirac	Clc1ccc(cc1)C(=O)c1n(C)c(cc1C)CC(O)=O	1	1
Zonisamide	S(=O)(=O)(N)Cc1noc2c1cccc2	1	1
Zotepine	Clc1cc2c(Sc3c(C=C2OCCN(C)C)cccc3)cc1	1	1
adinazolam	Clc1cc2c(-n3c(nnc3CN(C)C)CN=C2c2ccccc2)cc1	1	1
alfentanil	O=C1N(N=NN1CC)CCN1CCC(N(C(=O)CC)c2ccccc2)(CC1)COC	1	1
alizapride	O(C)c1cc2[nH]nnc2cc1C(=O)NCC1N(CCC1)CC=C	1	1
alogliptin	O=C1N(C)C(=O)N(Cc2ccccc2C#N)C(N2C[C@H](N)CCC2)=C1	1	1
amifostine	S(P(O)(O)=O)CCNCCCN	1	1
atomoxetine	O([C@H](CCNC)c1ccccc1)c1ccccc1C	1	1
betazole	[nH]1nccc1CCN	1	1
bromfenac	Brc1ccc(cc1)C(=O)c1cccc(CC(O)=O)c1N	1	1
calcitriol	OC1CC(O)CC(=CC=C2C3CCC(C(CCCC(O)(C)C)C)C3(CCC2)C)C1=C	1	1
cephalexin	S1[C@H]2N(C(C(O)=O)=C(C1)C)C(=O)[C@H]2NC(=O)[C@H](N)c1ccccc1	1	1
cetirizine hydrochloride	Clc1ccc(cc1)C(N1CCN(CC1)CCOCC(O)=O)c1ccccc1	1	1
chlormezanone	Clc1ccc(cc1)C1S(=O)(=O)CCC(=O)N1C	1	1
chloroform	ClC(Cl)Cl	1	1
cibenzoline	N1CCN=C1C1CC1(c1ccccc1)c1ccccc1	1	0
clarithromycin	O1C(CC)C(O)(C)C(O)C(C)C(=O)C(CC(OC)(C)C(OC2OC(CC(N(C)C)C2O)C)C(C)C(OC2OC(C)C(O)C(OC)(C2)C)C(C)C1=O)C	1	1
clopamide	Clc1ccc(cc1S(=O)(=O)N)C(=O)NN1C(CCCC1C)C	1	0
conivaptan	O=C(N1CCc2[nH]c(nc2-c2c1cccc2)C)c1ccc(NC(=O)c2ccccc2-c2ccccc2)cc1	1	1
cyclobenzaprine	N(CCC=C1c2c(C=Cc3c1cccc3)cccc2)(C)C	1	1
dalfampridine	n1ccc(N)cc1	1	1
doxapram	O1CCN(CC1)CCC1CN(CC)C(=O)C1(c1ccccc1)c1ccccc1	1	1
doxycycline	OC1=C2[C@@H]([C@H](c3c1c(O)ccc3)C)[C@H](O)[C@@H]1[C@@](O)(C(=O)\C(=C(/O)\N)\C(=O)[C@H]1N(C)C)C2=O	1	1
drotaverine	O(CC)c1cc(ccc1OCC)\C=C\1/NCCc2cc(OCC)c(OCC)cc/12	1	1
entecavir	O=C1NC(=Nc2n(cnc12)[C@H]1C[C@H](O)[C@@H](CO)C1=C)N	1	1
ephedrine	OC(C(NC)C)c1ccccc1	1	1
ethynylestradiol	Oc1cc2CC[C@H]3[C@@H]4CC[C@@](O)(C#C)[C@]4(CC[C@@H]3c2cc1)C	1	1
etilefrine	Oc1cc(ccc1)C(O)CNCC	1	1
flupirtine	Fc1ccc(cc1)CNc1nc(N)c(NC(OCC)=O)cc1	1	1
fomepizole	[nH]1ncc(c1)C	1	1
glucose	O1C(CO)C(O)C(O)C(O)C1O	1	1
hydroxyurea	O=C(NO)N	1	1
ifosfamide	ClCCN1P(OCCC1)(=O)NCCCl	1	1
indecainide	O=C(N)C1(c2c(-c3c1cccc3)cccc2)CCCNC(C)C	1	1
lacosamide	O(C[C@@H](NC(=O)C)C(=O)NCc1ccccc1)C	1	1
levoprotiline	O[C@H](CC12CCC(c3c1cccc3)c1c2cccc1)CNC	1	0
lomustine	ClCCN(N=O)C(=O)NC1CCCCC1	1	1
loxiglumide	Clc1cc(ccc1Cl)C(=O)NC(CCC(O)=O)C(=O)N(CCCCC)CCCOC	1	1
miglitol	O[C@H]1[C@H](O)[C@@H](O)CN(CCO)[C@@H]1CO	1	1
miglustat	O[C@H]1[C@H](O)[C@@H](O)CN(CCCC)[C@@H]1CO	1	1
minocycline	OC=1[C@@H](N(C)C)[C@@H]2C[C@H]3C(=C(O)[C@]2(O)C(=O)C=1C(=O)N)C(=O)c1c(C3)c(N(C)C)ccc1O	1	1
molsidomine	O1[N-][N+](N2CCOCC2)=CC1=NC(OCC)=O	1	1
nevirapine	O=C1Nc2c(nccc2C)N(c2ncccc12)C1CC1	1	1
nimodipine	O(C(=O)C=1C(C(C(OCCOC)=O)=C(NC=1C)C)c1cc([N+](=O)[O-])ccc1)C(C)C	1	1
n-methyl-2-pyridineethanamine	[NH2+](CCc1ncccc1)C	1	0
nomifensine	Nc1c2c(ccc1)C(CN(C2)C)c1ccccc1	1	1
noscapine	O1[C@@H](c2c(c(OC)c(OC)cc2)C1=O)[C@@H]1N(CCc2c1c(OC)c1OCOc1c2)C	1	0
oxtriphylline	O=C1N(C)C([O-])=C2N=CN=C2N1C	1	1
phe-l-pro	OC(=O)[C@H]1N(CCC1)C(=O)[C@H](N)Cc1ccccc1	1	0
phenacemide	O=C(NC(=O)N)Cc1ccccc1	1	1
phensuximide	O=C1N(C)C(=O)CC1c1ccccc1	1	1
pyrimethamine	Clc1ccc(cc1)-c1c(nc(nc1N)N)CC	1	1
reboxetine	O1CCNC[C@@H]1[C@H](Oc1ccccc1OCC)c1ccccc1	1	1
rosiglitazone	S1C(Cc2ccc(OCCN(C)c3ncccc3)cc2)C(=O)NC1=O	1	1
salicylic acid	Oc1ccccc1C(O)=O	1	1
sodium valproate	OC(=O)C(CCC)CCC	1	1
solifenacin	O(C(=O)N1CCc2c(cccc2)[C@@H]1c1ccccc1)[C@@H]1C2CCN(C1)CC2	1	1
temozolomide	O=C1n2c(N=NN1C)c(nc2)C(=O)N	1	1
terodiline	N(C(C)(C)C)C(CC(c1ccccc1)c1ccccc1)C	1	0
theophyline	O=C1N(C)C(=O)N(c2nc[nH]c12)C	1	1
tizanidine	Clc1ccc2nsnc2c1NC=1NCCN=1	1	1
toluene	c1ccccc1C	1	0
ursodeoxycholic_acid	O[C@@H]1CC[C@]2([C@@H](C1)C[C@H](O)[C@H]1[C@@H]3CC[C@H](C(CCC(O)=O)C)[C@]3(CC[C@@H]12)C)C	1	1
ezetimibe	Fc1ccc(cc1)[C@@H](O)CC[C@@H]1[C@H](N(C1=O)c1ccc(F)cc1)c1ccc(O)cc1	1	1
abiraterone_acetate	O(C(=O)C)[C@@H]1CC2=CC[C@H]3[C@@H]4CC=C([C@]4(CC[C@@H]3[C@]2(CC1)C)C)c1cccnc1	1	1
ticagrelor	S(CCC)c1nc(N[C@@H]2C[C@H]2c2cc(F)c(F)cc2)c2nnn(c2n1)[C@@H]1C[C@H](OCCO)[C@@H](O)[C@H]1O	1	1
altretamine	n1c(nc(nc1N(C)C)N(C)C)N(C)C	1	1
bephenium	O(CC[N+](Cc1ccccc1)(C)C)c1ccccc1	0	1
bethanechol	O(C(C[N+](C)(C)C)C)C(=O)N	0	1
Edrophonium	Oc1cc([N+](CC)(C)C)ccc1	0	1
Gallamine	[I-].[I-].[I-].O(CC[N+](CC)(CC)CC)c1c(OCC[N+](CC)(CC)CC)cccc1OCC[N+](CC)(CC)CC	0	1
ipratropium	O(C(=O)C(CO)c1ccccc1)C1CC2[N+](C(C1)CC2)(C(C)C)C	0	1
obidoxime	O(C[n+]1ccc(cc1)\C=N\O)C[n+]1ccc(cc1)\C=N\O	0	0
pentolinium	[N+]1(CCCC1)(CCCCC[N+]1(CCCC1)C)C	0	1
poldine	O(CC1[N+](CCC1)(C)C)C(=O)C(O)(c1ccccc1)c1ccccc1	0	0
vecuronium	O(C(=O)C)[C@@H]1[C@@]2([C@H]([C@H]3[C@H](CC2)[C@@]2([C@H](C[C@H](OC(=O)C)[C@@H](N4CCCCC4)C2)CC3)C)C[C@@H]1[N+]1(CCCCC1)C)C	0	1
amdinocillin	S1[C@H]2N([C@@H](C(O)=O)C1(C)C)C(=O)[C@H]2\N=C\N1CCCCCC1	0	1
Amikacin	O1[C@H](CN)[C@@H](O)[C@H](O)[C@@H](O)[C@H]1O[C@H]1[C@H](O)[C@@H](O[C@H]2O[C@H](CO)[C@@H](O)[C@H](N)[C@H]2O)[C@H](NC(=O)[C@H](O)CCN)C[C@@H]1N	0	1
Cefodizime	s1c(CC(O)=O)c(nc1SCC=1CS[C@H]2N(C=1C(O)=O)C(=O)[C@H]2NC(=O)\C(=N/OC)\c1nc(sc1)N)C	0	1
Moxalactam	S(CC=1CO[C@H]2N(C=1C(=O)[O-])C(=O)[C@@]2(OC)NC(=O)[C@H](C(O)=O)c1ccc(O)cc1)c1nnnn1C	0	1
Tobramycin	O1[C@H](CO)[C@@H](O)[C@H](N)[C@@H](O)[C@H]1O[C@@H]1[C@H](O)[C@H](O[C@H]2O[C@H](CN)[C@@H](O)C[C@H]2N)[C@@H](N)C[C@H]1N	0	1
pancuronium	O(C(=O)C)C1C2(C(CC1[N+]1(CCCCC1)C)C1C(CC2)C2(CC([N+]3(CCCCC3)C)C(OC(=O)C)CC2CC1)C)C	0	1
cefoxitin sodium	s1cccc1CC(=O)NC1(OC)C2SCC(COC(=O)N)=C(N2C1=O)C(O)=O	0	1
cysteamine	SCCN	0	1
paromomycin	O1[C@@H](CN)[C@@H](O)[C@H](O)[C@@H](N)[C@H]1O[C@H]1[C@@H](O)[C@@H](O[C@@H]1CO)O[C@H]1[C@H](O[C@H]2O[C@H](CO)[C@@H](O)[C@H](O)[C@H]2N)[C@@H](N)C[C@@H](N)[C@@H]1O	0	1
Lactulose	O1[C@](O)(CO)[C@@H](O)[C@H](O[C@@H]2O[C@H](CO)[C@H](O)[C@H](O)[C@H]2O)[C@H]1CO	0	1
Zanamivir	O1[C@@H]([C@H](O)[C@H](O)CO)[C@H](NC(=O)C)[C@@H](NC(N)=N)C=C1C(O)=O	0	1
deferoxamine	O=C(N(O)CCCCCNC(=O)CCC(=O)N(O)CCCCCN)CCC(=O)NCCCCCN(O)C(=O)C	0	1
Nedocromil	O1c2c(cc3c(N(CC)C(=CC3=O)C(O)=O)c2CCC)C(=O)C=C1C(O)=O	0	1
pyrantel embonate	Oc1c(c2c(cc1C(O)=O)cccc2)Cc1c2c(cc(C(O)=O)c1O)cccc2	0	0
Amygdalin	O1[C@H](CO)[C@@H](O)[C@H](O)[C@@H](O)[C@@H]1OC[C@H]1O[C@@H](O[C@H](C#N)c2ccccc2)[C@H](O)[C@@H](O)[C@@H]1O	0	0
Iohexol	Ic1c(C(=O)NC[C@H](O)CO)c(I)c(N(C(=O)C)C[C@H](O)CO)c(I)c1C(=O)NC[C@H](O)CO	0	1
Moexipril_diacid	O(C)c1cc2C[C@H](N(Cc2cc1OC)C(=O)[C@@H](N[C@@H](CCc1ccccc1)C(O)=O)C)C(O)=O	0	1
albendazole	S(CCC)c1cc2[nH]c(nc2cc1)NC(OC)=O	0	1
physostigmine	O(C(=O)NC)c1cc2c(N([C@H]3N(CC[C@@]23C)C)C)cc1	0	1
diphemanil	[N+]1(CCC(CC1)=C(c1ccccc1)c1ccccc1)(C)C	0	1
Trospium	O(C(=O)C(O)(c1ccccc1)c1ccccc1)C1C[C@@H]2[N+]3([C@H](C1)CC2)CCCC3	0	1
penciclovir	O=C1N=C(Nc2n(cnc12)CCC(CO)CO)N	0	1
doxorubicin	O1[C@@H](C)[C@@H](O)[C@@H](N)C[C@@H]1O[C@@H]1c2c(C[C@](O)(C1)C(=O)CO)c(O)c1c(C(=O)c3c(cccc3OC)C1=O)c2O	0	1
eprosartan	s1cccc1C\C(=C/c1n(Cc2ccc(cc2)C(O)=O)c(nc1)CCCC)\C(O)=O	0	1
melagatran	OC(=O)CN[C@@H](C(=O)N1CC[C@H]1C(=O)NCc1ccc(cc1)C(N)=N)C1CCCCC1	0	0
pyridostigmine	O(C(=O)N(C)C)c1ccc[n+](c1)C	0	1
iloprost	OC1CC2C(CC(C2)=CCCCC(O)=O)C1C=CC(O)C(CC#CC)C	0	1
mannitol	OC(C(O)C(O)CO)C(O)CO	0	1
bambuterol	O(C(=O)N(C)C)c1cc(cc(OC(=O)N(C)C)c1)C(O)CNC(C)(C)C	0	1
bretylium tosilate	Brc1ccccc1[CH-][N+](CC)(C)C	0	1
lisinopril	OC(=O)C1N(CCC1)C(=O)C(NC(CCc1ccccc1)C(O)=O)CCCCN	0	1
Netivudine	O1[C@H](CO)[C@@H](O)[C@H](O)[C@@H]1N1C=C(C#CC)C(=O)NC1=O	0	0
pafenolol	O(CC(O)CNC(C)C)c1ccc(cc1)CCNC(=O)NC(C)C	0	0
Fosmidomycin	P(O)(O)(=O)CCCN(O)C=O	0	1
idarubicin hydrochloride	O1C(C)C(O)C(N)CC1OC1CC(O)(Cc2c1c(O)c1c(C(=O)c3c(cccc3)C1=O)c2O)C(=O)C	1	1
ribavirin	O1[C@H](CO)[C@@H](O)[C@@H](O)[C@@H]1n1nc(nc1)C(=O)N	1	1
Sulpiride	S(=O)(=O)(N)c1cc(C(=O)NC[C@H]2N(CCC2)CC)c(OC)cc1	1	1
didanosine	O1C(CCC1n1c2ncnc(O)c2nc1)CO	1	1
fluoxymesterone	F[C@@]12[C@H]([C@@H]3CC[C@@](O)(C)[C@]3(C[C@@H]1O)C)CCC1=CC(=O)CC[C@@]12C	1	1
Trandolapril	O(CC)C(=O)[C@@H](N[C@H](C(=O)N1[C@@H]2[C@@H](C[C@H]1C(O)=O)CCCC2)C)CCc1ccccc1	1	1
mercaptopurine	S=C1N=CNc2nc[nH]c12	1	1
methylphenobarbital	O=C1N(C)C(=O)NC(=O)C1(CC)c1ccccc1	1	1
levomepromazine	S1c2c(N(c3c1cccc3)CC(CN(C)C)C)cc(OC)cc2	1	1
Tranexamic_acid	OC(=O)C1CCC(CC1)CN	1	1
Valsartan	OC(=O)[C@@H](N(Cc1ccc(cc1)-c1ccccc1-c1[nH]nnn1)C(=O)CCCC)C(C)C	1	1
celiprolol hydrochloride	O(CC(O)CNC(C)(C)C)c1ccc(NC(=O)N(CC)CC)cc1C(=O)C	1	1
Oxytetracycline	OC=1[C@@H](N(C)C)[C@H]2[C@@](O)(C(=O)C=1C(=O)N)C(=O)C=1[C@@H]([C@](O)(c3c(C=1O)c(O)ccc3)C)[C@@H]2O	1	1
Ramipril	O(CC)C(=O)[C@@H](N[C@H](C(=O)N1[C@@H]2[C@H](C[C@H]1C(O)=O)CCC2)C)CCc1ccccc1	1	1
azithromycin	O1C(CC)C(O)(C)C(O)C(N(CC(CC(O)(C)C(OC2OC(CC(N(C)C)C2O)C)C(C)C(OC2OC(C)C(O)C(OC)(C2)C)C(C)C1=O)C)C)C	1	1
chlortetracycline hydrochloride	Clc1c2c(C(=O)C=3C(CC4C(O)(C(=O)C(C(=O)N)=C(O)C4N(C)C)C=3O)C2(O)C)c(O)cc1	1	1
gabapentin	OC(=O)CC1(CCCCC1)CN	1	1
enalapril	O(CC)C(=O)[C@H](N[C@@H](C(=O)N1CCC[C@H]1C(O)=O)C)CCc1ccccc1	1	1
Tolrestat	S=C(N(CC(O)=O)C)c1c2c(ccc1)c(C(F)(F)F)c(OC)cc2	1	1
vismodegib	Clc1ccc(NC(=O)c2ccc(S(=O)(=O)C)cc2Cl)cc1-c1ncccc1	1	1
brompheniramine maleate	Brc1ccc(cc1)C(CCN(C)C)c1ncccc1	1	1
lorcainide	Clc1ccc(N(C(=O)Cc2ccccc2)C2CCN(CC2)C(C)C)cc1	1	0
tocopheryl acetat	O1c2c(CCC1(CCCC(CCCC(CCCC(C)C)C)C)C)c(C)c(OC(=O)C)c(C)c2C	1	0
Desogestrel	O[C@@]1(CC[C@H]2[C@H]3[C@@H]([C@@H]4C(CC3)=CCCC4)C(C[C@]12CC)=C)C#C	1	1
chlortalidone	Clc1ccc(cc1S(=O)(=O)N)C1(O)NC(=O)c2c1cccc2	1	1
Almotriptan	S(=O)(=O)(N1CCCC1)Cc1cc2c([nH]cc2CCN(C)C)cc1	1	1
Clavulanic_acid	O\1[C@H]2N([C@@H](C(O)=O)/C/1=C/CO)C(=O)C2	1	1
clavulanate potassium	O1C2N(C(C(O)=O)C1=CCO)C(=O)C2	1	1
rilpivirine	n1c(Nc2c(cc(cc2C)\C=C\C#N)C)ccnc1Nc1ccc(cc1)C#N	1	1
Sibutramine	Clc1ccc(cc1)C1(CCC1)[C@H](N(C)C)CC(C)C	1	1
Tolterodine	Oc1ccc(cc1[C@@H](CCN(C(C)C)C(C)C)c1ccccc1)C	1	1
carboplatin	[Pt]1OC(=O)C2(CCC2)C(O1)=O.N.N	1	1
Urapidil	O(C)c1ccccc1N1CCN(CC1)CCCNC=1N(C)C(=O)N(C)C(=O)C=1	1	0
Carvedilol	O(CCNC[C@@H](OCc1c2c3c([nH]c2ccc1)cccc3)O)c1ccccc1OC	1	1
Clonazepam	Clc1ccccc1C1=NCC(=O)Nc2c1cc([N+](=O)[O-])cc2	1	1
Dantrolene	o1c(ccc1\C=N\N1CC(=O)NC1=O)-c1ccc([N+](=O)[O-])cc1	1	1
Enoximone	S(C)c1ccc(cc1)C(=O)C1=NC(=O)N=C1C	1	1
Methoxyamphetamine	O(C)c1cc(ccc1)C[C@H](N)C	1	1
Quinidine	O(C)c1cc2c(nccc2[C@H](O)[C@H]2N3C[C@@H]([C@H](C2)CC3)C=C)cc1	1	1
Riboflavin	O=C1NC(=O)N=C2N(c3cc(C)c(cc3N=C12)C)C[C@@H](O)[C@@H](O)[C@@H](O)CO	1	1
Trimipramine	N(C[C@@H](CN1c2c(CCc3c1cccc3)cccc2)C)(C)C	1	1
cinacalcet	FC(F)(F)c1cc(ccc1)CCCN[C@H](C)c1c2c(ccc1)cccc2	1	1
digoxin	O1C(C)C(OC2OC(C)C(O)C(O)C2)C(O)CC1OC1C(OC(OC2CC3CCC4C(CC(O)C5(C)C(CCC45O)C4=CC(OC4)=O)C3(CC2)C)CC1O)C	1	1
metyrapone	O=C(C(C)(C)c1cccnc1)c1cccnc1	1	1
perhexiline	N1CCCCC1CC(C1CCCCC1)C1CCCCC1	1	1
pizotifen malate	s1c2c(cc1)C(c1c(CC2)cccc1)=C1CCN(CC1)C	1	1
Flecainide	FC(F)(F)COc1ccc(OCC(F)(F)F)cc1C(=O)NC[C@@H]1NCCCC1	1	1
Sorivudine	Br\C=C\C1=CN([C@@H]2O[C@H](CO)[C@@H](O)[C@@H]2O)C(=O)NC1=O	1	0
ethylbenzene	c1ccccc1CC	1	0
fenofibrate	Clc1ccc(cc1)C(=O)c1ccc(OC(C(OC(C)C)=O)(C)C)cc1	1	1
mepindolol	O(CC(O)CNC(C)C)c1c2cc([nH]c2ccc1)C	1	0
mycophenolic_acid	O1Cc2c(c(O)c(C\C=C(\CCC(O)=O)/C)c(OC)c2C)C1=O	1	1
valdecoxib	S(=O)(=O)(N)c1ccc(cc1)-c1c(noc1C)-c1ccccc1	1	1
Acebutolol	O(C[C@@H](O)CNC(C)C)c1ccc(NC(=O)CCC)cc1C(=O)C	1	1
Chlorguanide	Clc1ccc(NC(NC(NC(C)C)=N)=N)cc1	1	1
Piretanide	S(=O)(=O)(N)c1cc(cc(N2CCCC2)c1Oc1ccccc1)C(O)=O	1	0
aprindine	N(CCCN(CC)CC)(C1Cc2c(C1)cccc2)c1ccccc1	1	1
Metoclopramide	Clc1cc(C(=O)NCCN(CC)CC)c(OC)cc1N	1	1
Moricizine	S1c2c(N(c3c1cccc3)C(=O)CCN1CCOCC1)cc(NC(OCC)=O)cc2	1	1
Dihydrocodeine	O1[C@@H]2[C@]34[C@H]([C@H](N(CC3)C)Cc3c4c1c(OC)cc3)CC[C@@H]2O	1	1
Amantadine	NC12CC3CC(C1)CC(C2)C3	1	1
Diazoxide	Clc1cc2S(O)(=O)=NC(=Nc2cc1)C	1	1
Diethylstilbestrol	Oc1ccc(cc1)/C(=C(\CC)/c1ccc(O)cc1)/CC	1	1
Felbamate	O(CC(COC(=O)N)c1ccccc1)C(=O)N	1	1
Isotretinoin	OC(=O)\C=C(\C=C\C=C(\C=C/C=1C(CCCC=1C)(C)C)/C)/C	1	1
Mefenamic_acid	OC(=O)c1ccccc1Nc1cccc(C)c1C	1	1
Telmisartan	OC(=O)c1ccccc1-c1ccc(cc1)Cn1c2c(nc1CCC)c(cc(c2)-c1nc2c(n1C)cccc2)C	1	1
Tibolone	O=C1CC=2C[C@H]([C@H]3[C@@H]4CC[C@](O)(C#C)[C@]4(CC[C@@H]3C=2CC1)C)C	1	1
carbazepine10_11epoxide	O1C2C1c1c(N(c3c2cccc3)C(=O)N)cccc1	1	0
etacrynic-acid	Clc1c(Cl)c(OCC(O)=O)ccc1C(=O)C(CC)=C	1	1
ginkgolide_b	O1C2C(O)(C34OC5OC(=O)C(O)C56C3(C(OC4=O)CC6C(C)(C)C)C2O)C(C)C1=O	1	1
lofexidine	Clc1cccc(Cl)c1OC(C)C=1NCCN=1	1	1
toliprolol	O(CC(O)CNC(C)C)c1cc(ccc1)C	1	0
chloropromazine	Clc1cc2N(c3c(Sc2cc1)cccc3)CCCN(C)C	1	1
naftidrofuryl oxalate	O1CCCC1CC(Cc1c2c(ccc1)cccc2)C(OCCN(CC)CC)=O	1	0
Scopolamine	O1[C@H]2[C@H]3N([C@@H]([C@@H]12)CC(OC(=O)[C@H](CO)c1ccccc1)C3)C	1	1
Tetrahydrocannabinol	O1c2c([C@H]3[C@@H](CCC(=C3)C)C1(C)C)c(O)cc(c2)CCCCC	1	0
estazolam	Clc1cc2c(-n3c(nnc3)CN=C2c2ccccc2)cc1	1	1
Atropine	O(C(=O)[C@H](CO)c1ccccc1)C1C[C@@H]2N([C@H](C1)CC2)C	1	1
Nicotinic_acid	OC(=O)c1cccnc1	1	1
ciclopirox	O=C1N(O)C(=CC(=C1)C)C1CCCCC1	1	1
Acipimox	OC(=O)c1ncc([n+]([O-])c1)C	1	1
Carbimazole	S=C1N(C=CN1C)C(OCC)=O	1	1
Chorpropamide	Clc1ccc(S(=O)(=O)NC(=O)NCCC)cc1	1	0
Clopenthixol	Clc1cc\2c(Sc3c(cccc3)/C/2=C\CCN2CCN(CC2)CCO)cc1	1	1
Dothiepin	S1Cc2c(cccc2)\C(\c2c1cccc2)=C/CCN(C)C	1	1
Ketoprofen	OC(=O)[C@H](C)c1cc(ccc1)C(=O)c1ccccc1	1	1
Nizatidine	s1cc(nc1CN(C)C)CSCCN\C(\NC)=C/[N+](=O)[O-]	1	1
Pefloxacin	Fc1cc2c(N(C=C(C(O)=O)C2=O)CC)cc1N1CCN(CC1)C	1	1
Pentazocine	Oc1cc2c(C[C@@H]3N(CC[C@@]2(C)[C@H]3C)CC=C(C)C)cc1	1	1
Perindopril	O(CC)C(=O)[C@H](N[C@@H](C(=O)N1[C@@H]2[C@H](C[C@H]1C(O)=O)CCCC2)C)CCC	1	1
Propafenone	O(C[C@@H](O)CNCCC)c1ccccc1C(=O)CCc1ccccc1	1	1
Propoxyphene	O([C@]([C@@H](CN(C)C)C)(Cc1ccccc1)c1ccccc1)C(=O)CC	1	1
Tacrine	n1c2c(CCCC2)c(N)c2c1cccc2	1	1
Zolpidem	O=C(N(C)C)Cc1n2C=C(C=Cc2nc1-c1ccc(cc1)C)C	1	1
dextropropoxyphene hydrochloride	O(C(Cc1ccccc1)(C(CN(C)C)C)c1ccccc1)C(=O)CC	1	1
methylergometrine maleate	OCC(NC(=O)C1C=C2C(N(C1)C)Cc1c3c2cccc3n(c1)C)C	1	1
zuclopenthixol	Clc1cc\2c(Sc3c(cccc3)/C/2=C/CCN2CCN(CC2)CCO)cc1	1	1
Cotinine	O=C1N(C)[C@@H](CC1)c1cccnc1	1	1
Diclofenac	Clc1cccc(Cl)c1Nc1ccccc1CC(O)=O	1	1
Oxazepam	Clc1cc2c(NC(=O)[C@H](O)N=C2c2ccccc2)cc1	1	1
benzene	c1ccccc1	1	0
palonosetron	O=C1N(C[C@H]2CCCc3c2c1ccc3)[C@H]1C2CCN(C1)CC2	1	1
sulfadiazine	S(=O)(=O)(Nc1ncccn1)c1ccc(N)cc1	1	1
Cyproterone_acetate	ClC=1C2=CC(=O)[C@H]3[C@H](C3)[C@@]2([C@@H]2[C@H]([C@@H]3CC[C@](OC(=O)C)(C(=O)C)[C@]3(CC2)C)C=1)C	1	1
Rivastigmine	O(C(=O)N(CC)C)c1cc(ccc1)[C@@H](N(C)C)C	1	1
vilazodone	Cl.o1c2c(cc1C(=O)N)cc(N1CCN(CC1)CCCCc1c3cc(ccc3[nH]c1)C#N)cc2	1	1
Chlordiazepoxide	Clc1cc2c(N=C(NC)C[N+]([O-])=C2c2ccccc2)cc1	1	1
Ciprofibrate	ClC1(Cl)C[C@@H]1c1ccc(OC(C(O)=O)(C)C)cc1	1	0
Prednisolone	O=C1C=C2CC[C@@H]3[C@@H]([C@]2(C=C1)C)[C@@H](O)C[C@]1([C@H]3CC[C@]1(O)C(=O)CO)C	1	1
Tiacrilast	S(C)c1cc2c(N=CN(\C=C\C(O)=O)C2=O)cc1	1	0
Tolmetin	OC(=O)Cc1n(C)c(cc1)C(=O)c1ccc(cc1)C	1	1
Viloxazine	O1CCNC[C@@H]1COc1ccccc1OCC	1	1
propanolol	O(C[C@H](O)CNC(C)C)c1c2c(ccc1)cccc2	1	1
tapentadol	Oc1cc(ccc1)[C@@H]([C@H](CN(C)C)C)CC	1	1
Amosulalol	S(=O)(=O)(N)c1cc(ccc1[C@H](O)CNCCOc1ccccc1OC)C	1	0
Bornaprine	O(C(=O)[C@@]1([C@H]2CC[C@@H](C1)C2)c1ccccc1)CCCN(CC)CC	1	1
Carbamazepine	O=C(N)N1c2c(C=Cc3c1cccc3)cccc2	1	1
Cicaprost	O[C@@H]1C[C@H]2[C@H](C\C(\C2)=C/COCC(O)=O)[C@H]1C#C[C@@H](O)[C@H](CC#CCC)C	1	0
Coumarin	O1c2c(C=CC1=O)cccc2	1	0
Dextromoramide	O1CCN(CC1)C[C@H](C(C(=O)N1CCCC1)(c1ccccc1)c1ccccc1)C	1	1
Ergotamine	O1[C@](NC(=O)[C@@H]2C=C3[C@H](N(C2)C)Cc2c4c3cccc4[nH]c2)(C)C(=O)N2[C@@H](Cc3ccccc3)C(=O)N3[C@@H](CCC3)[C@]12O	1	1
Ethinyl_Estradiol	Oc1cc2CC[C@H]3[C@@H]4CC[C@@](O)(C#C)[C@]4(CC[C@@H]3c2cc1)C	1	1
Fenclofenac	Clc1cc(Cl)ccc1Oc1ccccc1CC(O)=O	1	0
Flupentixol	S1c2c(cc(cc2)C(F)(F)F)\C(\c2c1cccc2)=C\CCN1CCN(CC1)CCO	1	1
Fusidic_acid	O(C(=O)C)[C@H]/1C[C@]2([C@@H](C[C@@H](O)[C@H]3[C@@]2(CC[C@H]2[C@H](C)[C@H](O)CC[C@@]23C)C)\C\1=C(/CCC=C(C)C)\C(O)=O)C	1	1
Glipizide	S(=O)(=O)(NC(=O)NC1CCCCC1)c1ccc(cc1)CCNC(=O)c1ncc(nc1)C	1	1
Letrozole	n1cn(nc1)C(c1ccc(cc1)C#N)c1ccc(cc1)C#N	1	1
Levobunolol	O(C[C@@H](O)CNC(C)(C)C)c1c2c(ccc1)C(=O)CCC2	1	1
Lormetazepam	Clc1ccccc1C1=N[C@H](O)C(=O)N(c2c1cc(Cl)cc2)C	1	1
Lornoxicam	Clc1sc2c(S(=O)(=O)N(C)C(C(=O)Nc3ncccc3)=C2O)c1	1	1
Megestrol_acetate	O=C1CC[C@@]2([C@@H]3[C@H]([C@@H]4CC[C@](OC(=O)C)(C(=O)C)[C@]4(CC3)C)C=C(C2=C1)C)C	1	1
Meperidine	O(C(=O)C1(CCN(CC1)C)c1ccccc1)CC	1	1
Midazolam	Clc1cc2c(-n3c(CN=C2c2ccccc2F)cnc3C)cc1	1	1
Nicorandil	O([N+](=O)[O-])CCNC(=O)c1cccnc1	1	1
Penbutolol	O(C[C@@H](O)CNC(C)(C)C)c1ccccc1C1CCCC1	1	1
Phenindione	O=C1c2c(cccc2)C(=O)C1c1ccccc1	1	1
Procarbazine	O=C(NC(C)C)c1ccc(cc1)CNNC	1	1
Selegiline	N([C@@H](Cc1ccccc1)C)(CC#C)C	1	1
Terfenadine	OC(C1CCN(CC1)CCC[C@@H](O)c1ccc(cc1)C(C)(C)C)(c1ccccc1)c1ccccc1	1	1
amiodarone	Ic1cc(cc(I)c1OCCN(CC)CC)C(=O)c1c2c(oc1CCCC)cccc2	1	1
antrafenine	FC(F)(F)c1cc(N2CCN(CC2)CCOC(=O)c2ccccc2Nc2c3c(ncc2)cc(cc3)C(F)(F)F)ccc1	1	1
beta-d-fructose	OC(C(O)C(=O)CO)C(O)CO	1	0
buflomedil	O(C)c1cc(OC)cc(OC)c1C(=O)CCCN1CCCC1	1	0
bufuralol	o1c2c(cc1C(O)CNC(C)(C)C)cccc2CC	1	1
busulfan	S(OCCCCOS(=O)(=O)C)(=O)(=O)C	1	1
carprofen	Clc1cc2c3c([nH]c2cc1)cc(cc3)C(C(O)=O)C	1	1
cefadroxil	S1C2N(C(=O)C2NC(=O)C(N)c2ccc(O)cc2)C(C(O)=O)=C(C1)C	1	1
cefazolin	s1c(nnc1SCC=1CS[C@H]2N(C=1C(O)=O)C(=O)[C@H]2NC(=O)Cn1nnnc1)C	1	1
chenodeoxycholic_acid	O[C@@H]1CC[C@]2([C@@H](C1)C[C@@H](O)[C@H]1[C@@H]3CC[C@H]([C@@H](CCC(O)=O)C)[C@]3(CC[C@@H]12)C)C	1	1
cicloprolol	O(CC(O)CNC(C)C)c1ccc(OCCOCC2CC2)cc1	1	0
clinafloxacin	Clc1c2N(C=C(C(O)=O)C(=O)c2cc(F)c1N1CC(N)CC1)C1CC1	1	0
colchicine	O(C)C1=CC=C2C(=CC1=O)C(NC(=O)C)CCc1c2c(OC)c(OC)c(OC)c1	1	1
ethanol	OCC	1	1
fenspiride	O1C2(CCN(CC2)CCc2ccccc2)CNC1=O	1	1
fleroxacin	Fc1c2N(CC(C(O)=O)C(=O)c2cc(F)c1N1CCN(CC1)C)CCF	1	1
loracarbef	ClC=1CCC2N(C(=O)C2NC(=O)C(N)c2ccccc2)C=1C(O)=O	1	1
lymecycline	OC=1[C@@H](N(C)C)[C@@H]2C[C@H]3C(=C(O)[C@]2(O)C(=O)C=1C(=O)NCNCCCC[C@H](N)C(O)=O)C(=O)c1c(cccc1O)[C@]3(O)C	1	1
roquinimex	OC=1c2c(N(C)C(=O)C=1C(=O)N(C)c1ccccc1)cccc2	1	1
zidovudine	O1[C@H](CO)[C@@H](N=[N+]=[N-])C[C@@H]1N1C=C(C)C(=O)NC1=O	1	1
carglumic _acid	OC(=O)CC[C@H](NC(=O)N)C(O)=O	1	1
			Note:1,drug; 0,drug-like
